# Supplementary material for: Candidate regulators of Early Leaf Development in Maize Perturb Hormone Signalling and Secondary Cell Wall Formation When Constitutively Expressed in Rice
Source: PubMed Central journal article supplement (PMC5495811; doi:10.1038/s41598-017-04361-w), 2017-07-03

**SUPPLEMENTARY INFORMATION FILE**

**CANDIDATE REGULATORS OF EARLY LEAF DEVELOPMENT IN MAIZE PERTURB HORMONE  
SIGNALLING AND SECONDARY CELL WALL FORMATION WHEN CONSTITUTIVELY  
EXPRESSED IN RICE**

Peng Wang, Shanta Karki, Akshaya K. Biswal, Hsiang-Chun Lin, Mary Jacqueline Dionora, Govinda Rizal, Xiaojia Yin, Mara L. Schuler, Tom Hughes, Jim P. Fouracre, Basel Abu Jamous, Olga Sedelnikova, Shuen-Fang Lo, Anindya Bandyopadhyay, Su-May Yu, Steven Kelly, W. Paul Quick and Jane A. Langdale

## LEGENDS

**Dataset S1 (xls).** Data used for regression analysis of vein number versus leaf width (cm).

Corresponding non-transgenic control samples are listed as 'regression' in each of 4 datasets (Kitaake T1 lines - leaf 6 & 8; IR64 T0 lines - leaf 6; IR64 T1 lines - leaf 6; IR64 T0 lines - penultimate leaf).

**Dataset S2 (xls).** Phenotyping data for IR64 T0 lines, showing measurements of vein number, and leaf width. Transgene presence as determined by PCR is indicated.

**Dataset S3 (xls).** Phenotyping data for Kitaake & IR64 T1 lines, showing measurements of vein number, distance between veins, cell number between veins and bundle sheath cell size. Transgene transcript level as determined by PCR is shown where measured.

**Dataset S4 (xls).** Primer sequences used for cloning and for RT-PCR.

**Information S1.** Sequences of all 60 genes transformed into rice.

**Information S2.** Individual datasheets for T0 rice lines summarized in Dataset S2. Each page shows the gene expression profile in maize foliar and husk leaf primordia as reported in <sup>1</sup> (green circles refer to relative expression level in samples of the shoot apical meristem plus plastochron 1/2 leaf primordia, orange circles to levels in P3/4 leaf primordia and blue circles to levels in P5 leaf primordia); construct composition and ID; number and ID of independent transgenic rice lines. Cropped agarose gel images show PCR products of representative genomic PCR reactions (detecting presence of transgene). Linear regression plots illustrate number of veins versus leaf width in each line (x axis = leaf width in cm; y axis = vein number). Representative leaf samples are shown with views of the adaxial leaf surface taken using a hand-held microscope.

**Information S3.** Individual datasheets for T1 rice lines summarized in Dataset S3. Each page shows the gene expression profile in maize foliar and husk leaf primordia as reported in <sup>1</sup> (green circles refer

to relative expression level in samples of the shoot apical meristem plus plastochron 1/2 leaf primordia, orange circles to levels in P3/4 leaf primordia and blue circles to levels in P5 leaf primordia); construct composition and ID; number and ID of independent transgenic rice lines. Where available, cropped agarose gel images show PCR products of representative genomic PCR reactions (detecting presence of transgene) and RT-PCR reactions (detecting transgene transcripts). qRT-PCR data are shown for one construct. Polynomial (Kitaake lines) or linear (IR64 lines) regression plots illustrate number of veins versus leaf width in each line. Representative leaf samples (either hand cut transverse leaf sections viewed by fluorescence microscopy or views of the adaxial leaf surface taken using a hand-held microscope) are shown in each case. Fluorescence images are visualized through autofluorescence of chlorophyll (red) and lignin (blue).

**Figure S1.** Phylogenetic tree of GRMZM2G074032 (*ZmIDD16*). Maximum-likelihood tree of the GRMZM2G074032 orthogroup (as defined by Orthofinder<sup>2</sup>). Numbers at each node are support values based on the consensus tree of 10 bootstrap replicates. Arabidopsis and rice proteins, plus the maize protein encoded by the gene analysed in this study are highlighted in yellow. Branch lengths reflect the number of amino acid substitutions per site.

**Figure S2.** Phylogenetic tree of GRMZM2G027068 (*ZmbHLH106*). Maximum-likelihood tree of the GRMZM2G027068 orthogroup (as defined by Orthofinder<sup>2</sup>). Numbers at each node are support values based on the consensus tree of 10 bootstrap replicates. Arabidopsis proteins, plus the maize protein encoded by the gene analysed in this study are highlighted in yellow. Branch lengths reflect the number of amino acid substitutions per site.

**Figure S3.** Phylogenetic tree of GRMZM2G140694 (*ZmHCA2*). Maximum-likelihood tree of one of the sub-groups of the GRMZM2G140694 orthogroup (as defined by Orthofinder<sup>2</sup>). Numbers at each node are support values based on the consensus tree of 10 bootstrap replicates. Arabidopsis HCA2, plus the maize protein encoded by the gene analysed in this study are highlighted in yellow. Branch lengths reflect the number of amino acid substitutions per site.

**Figure S4.** Phylogenetic tree of GRMZM2G480386 (YUCCA). Maximum-likelihood tree of the GRMZM2G480386 orthogroup (as defined by Orthofinder <sup>2</sup>). Numbers at each node are support values based on the consensus tree of 10 bootstrap replicates. Rice YUCCA8 plus the maize protein encoded by the gene analysed in this study are highlighted in yellow. Branch lengths reflect the number of amino acid substitutions per site.

**Figure S5.** Phylogenetic tree of GRMZM2G011463 (*ZmSAUR60*). Maximum-likelihood tree of the GRMZM2G011463 orthogroup (as defined by Orthofinder <sup>2</sup>). Numbers at each node are support values based on the consensus tree of 10 bootstrap replicates. Rice and Arabidopsis proteins, plus the maize protein encoded by the gene analysed in this study are highlighted in yellow. Branch lengths reflect the number of amino acid substitutions per site.

**Figure S6.** Phylogenetic tree of GRMZM2G098988 (*ZmSACL3*). Maximum-likelihood tree of the GRMZM2G098988 orthogroup (as defined by Orthofinder <sup>2</sup>). Numbers at each node are support values based on the consensus tree of 10 bootstrap replicates. Arabidopsis SACL3, plus the maize protein encoded by the gene analysed in this study are highlighted in yellow. Branch lengths reflect the number of amino acid substitutions per site.

**Figure S7.** Phylogenetic tree of GRMZM2G163724 (LRR kinase). Maximum-likelihood tree of the GRMZM2G163724 orthogroup (as defined by Orthofinder <sup>2</sup>). Numbers at each node are support values based on the consensus tree of 10 bootstrap replicates. Arabidopsis RDK1, plus the maize protein encoded by the gene analysed in this study are highlighted in yellow. Branch lengths reflect the number of amino acid substitutions per site.

**Figure S8.** Phylogenetic tree of GRMZM2G111045 (R2R3 MYB). Maximum-likelihood tree of the GRMZM2G111045 orthogroup (as defined by Orthofinder <sup>2</sup>). Numbers at each node are support values based on the consensus tree of 10 bootstrap replicates. Arabidopsis LMI2, plus the maize

protein encoded by the gene analysed in this study are highlighted in yellow. Branch lengths reflect the number of amino acid substitutions per site.

**Figure S9.** Phylogenetic tree of GRMZM2G114893 (Unknown). Maximum-likelihood tree of the GRMZM2G114893 orthogroup (as defined by Orthofinder<sup>2</sup>). Numbers at each node are support values based on the consensus tree of 10 bootstrap replicates. The maize protein encoded by the gene analysed in this study is highlighted in yellow. Branch lengths reflect the number of amino acid substitutions per site.

**Figure S10.** Phylogenetic tree of GRMZM2G377217 (*ZmWRKY12*). Maximum-likelihood tree of one of the sub-groups of the GRMZM2G377217 orthogroup (as defined by Orthofinder<sup>2</sup>). Numbers at each node are support values based on the consensus tree of 10 bootstrap replicates. Arabidopsis proteins plus the maize protein encoded by the gene analysed in this study are highlighted in yellow. Branch lengths reflect the number of amino acid substitutions per site.

**Figure S11.** Details of activation tagged line M0094935. **a)** Schematic of rice chromosome 3 showing insertion site of T-DNA (red arrow) upstream of Os03g50920 in line M0094935. **b)** Gel images of RT-PCR reactions showing transcript levels of 03g50920 relative to actin in 21 day old seedling shoots of wild-type (WT) and the insertion line (M0094935).

## REFERENCES

1. Wang, P., Kelly, S., Fouracre, J. P. & Langdale, J. A. Genome-wide transcript analysis of early maize leaf development reveals gene cohorts associated with the differentiation of C4 Kranz anatomy. *Plant J.* **75**, 656–670 (2013).
2. Emms, D. M. & Kelly, S. OrthoFinder: solving fundamental biases in whole genome comparisons dramatically improves orthogroup inference accuracy. *Genome Biol.* **16**, 157 (2015).

**Information File S1.** Sequences of all 60 genes transformed into rice.

>JL2\_\_GRMZM2G028046

ATGAGCAGAGGAGCTGAGAAGAAGAATTGGCCGCCGTCTCGGTCTTCTTCCTCCTCCTCTTCTT  
CACCGACGTCGTCGTGGGTCGCCAGCAGGTCCATGGCGGGGTTCTACCGCTACCCGTCCTCCA  
CTCGCACCTCCGGCAAGGACAGAACCAGCCGCCGCCAGCACCAGCTGCACCGACACAACAA  
CAAGGCGACAAGAGCAGCAGCAAGAAGAAGAGGAGGAGTATCAGCATCGGCCGGAGCATCAC  
GTGCGCGGGCTCCATCTGCAGTACCAAGGAGAGCTCGGTTCATGAGCCGGGACCGCCGCGGGC  
CCTCCAGCAGGTGCTCAGGGCACCTACGTGACGTCGACGTCAACGACGCCTCTGCCGCC  
GCCATCTCCGCCACGTCGTCCTTCAACTCGGAGACCACCGTGGCGTGCAGCACCACCGTCACG  
TCCTCGTCCTCGTCCTCGTCCGTGCGGACCTCCTTCAGGGGCGTGCACATCAGGAAGCTCTCC  
GGCTGCTACGAGTGCCACTCCGTCTTCGACCCCAGGAGCTTCGGCGCCGCCGCCTTCCCCTGC  
GCGGACTGCGACGAGGTGTTCCGCAAGGCAGAGTCGCTAGAGCTCCACAGAGCAACCAGGCA  
TGCAGTTTGGGAGCTGGGCCCCGAGGACACGAGCAGGAACATCGTGGAGATCATCTTCCAGTC  
CAGCTGGCCGGCCGGGAAGCAGCAGCAGGCCGCCGGTCTGCAAGATCGAGCGGGTACTCAAGG  
TGCAGAGCAGCGACAGGACCCTGGAGAGGTTTCGAGCAGTACAAGGAGAGCGTCAGGGAGAGG  
GCGAGCAGCGACCGGGGCAGGAAGAACAACCCTCGGTGCGTCGCCGACGGCAACGAGCTCCT  
CAGGTTCCACTGCACCACCTTCACTGCTCCCTCGGCCTCGCCGGCAGCACC GCGCTGTGCCG  
GGCGCCGCGTGAAGCTGTGCGCCATCGTCAGGGACGTTTCAGGGTCGACGACGACGGTA  
AGATTGCGACGATGGGCACCAGCGGGCGGCCACGACATGGCGCAGGCGGTGCTGTCCGA  
GTCGGACGGTGACAAGAGAGCAATGCTCGTGTGCAGGGTCGTCGCGGGGAGGGTGAAGAAGA  
AGGCCAGCGATGAGAAGAAGCCTTCAGAGGACTCTGGCTTTGACTCTGTCAGCCCCAGCACAG  
AAGGCGTCTGCTCGGATTTGGATCAACTCTTTGTCTTCAATCAGAGAGCTATACTGCCCTGCTT  
GTAGTCATATACAGTGGCTATTAG

>JL3\_\_GRMZM2G136494

ATGGTGAACGGCCGGGCAGATCGGCAGGCGTCAGGGAGGCCAATAAGACTTCCGCTGCCGC  
CATGGTGAAGACGACGACGACGACCAATAAGGAGGAGCTGGAGAGCCCGTCTACAGGTTAGC  
AGCGTTCAAGAGCCTCTTCTCGTGCAGGAACAGCCACGCGCGGCCGCGGGCGCCGGACACCG  
GCACCGGCAGCAGGAGCAAGAGGCTGGGCTGCTCCGCGCCGTCCATCTGCAAGCTCAAGGAC  
GACAGCGTGCCCGTGCCGCCAAGGAAACCACGGGCACGGCGTCGGCAGGCGAGCCCTGCA  
AGCGCCGCGCGTCCGTGAGCGGGAGCAGCGATCGGTGCGTGAAGAAGCCCCAATGTGGCGCT  
GGCAGCAACAAGCAGCTGCAGCGTGGCGGGTCGTCGTCGTCGTCGGGCGGGTCGTCGTTTCA  
GGCCGGCATGCAGCTGAGGCGGCTTTCGGGGTGCTACGAGTGCCACATGGTGGTGGCGGGCA  
GCGCCTCCATGAGGGCCACCACCATCTGCCCTGCCCGGACTGCGGCGAGGTGTTTCGTCAGG  
CAGGAGAGCCTCCAGCTCCACCAGTCCATCAGGCACGCAGTGTCCGAGCTTGGCACTGATGAC  
ACGAGCCGCAACATCATCGAGATCATCTTCCAGTCCAGCTGGCTCAAGAAGCAGAGCCCCGTG  
TGCAAGGTGCACCGCATCCTCAAGGTGAACAACACGCCCAGAACGCTGGCCCGCTTCGAGGAG  
TACCGTGACGCTGTCAAGGCCAGGGCGGGCGCCGAGCAGCTGGCGGTAGCGGGCGGCCAACA  
GCAACAGGCACCCGCGCTGCACCGCCGACGGCAACGAGCTGCTCCGGTTCCTACTGCGCCACC  
CTGGCCTGCTCGCTCGGCCTCAACGGCGCCACGCACCTCTGCGACGCCGCGGGGACCTGCGC  
AGCGTGCGGCATCATCCGCGACGGCTTCAGCAGCGGCGGGGTGCTGACCATGGCCACGAGCG  
GCCGCGCGCACGACGCTGCGGAGGCTGGCGCCGGACTGGATGAGGAAACCACTCCAAGGGC  
GATGCTGGTGTGCCGGGTTCATCGCGGGAAGGGTGAAGCGGCCAAAGAAGCGGTACCAGAGG  
AGGAGGCCGTGCGCGACGCCGCCGAGGAGTCAGAGTACGACTCGGTTGCGGGGTGCGCCGG  
GGTGTACTCCAACCTGGAGGAGCTGCTGGTGTTC AACCCAGGGCCATCCTCCCATGCTTTGT  
CGTTGTCTACAAGGCTTAG

>JL4\_\_GRMZM2G045883

ATGGCGCTCGAAGCTGTGGTGTTCCTCGAAGGAGCACCCGGGGTGTACGGCGGTCAAGGCGCG  
CCCGGCGTCTGCTGGGCTGCGGCTTCCACACCGAGGAGCTCGAGGTTCGAGGACAAGGGCGGC  
GTGTTTCTGCAAGGAGAGGCCGCCGACGCGCTGCCGCCGCCCGGTGGTGGCCGCCACCACGT  
GGGACTGGGACGCGGTGCTCTGCCCGTGTCTCACTGCACCAGCTGCAGGCGCCGTGGAGGAG  
TGCTGGGACGTGCAGCAGCAGCAGCATCAGCTCCTGTCCGTGTCCCGCCGCCCTCGTCCGC  
CGTCGCAGCGTCGTCGTTGGGCGCCGCAAGGCTGCCGCGTCGGAGGCGGCGCGGCGACGG  
CGGCGACGCCCAAGGCGGTGAGGAACACGGACGAGATGGAGAGCCAGCGCCGCAACCACAT  
TGCCGTGGAGCGCAACCGGCGGGCGGCAGATGAACGAGTACCTCTCCGTGCTCCGCTCCGCCA

TGCCGCCTTCCTACACGCAGCGGGGTGACCAGGCGTCGATCGTGGCTGGTGCCATCAACTTCG  
TCAAGGAGCTGGAGCAGCTGCTGCAGTCGCTGGAGGCGCAGAAGCGGTGCACCGAGCCACCG  
GCGCCGGCGCCGTTCCGCCGGCTTCTTCATCTTCCCTCAGTACTCCACCACCGCCGCGACGGT  
GGTGCGGTTGGCTCTAGTAGCGACAGCGCTGGCTCCGGCGGCGATCAGAGTGGCGGCGGCG  
GCGGCTGCGCGGGAGCGCGGCGAGGCGTGGCCGACATCGAGGTGTCCCTGGCGGAGAGCCA  
CGCCAACGTGAAGGTGCTCGCGGCGCGGCGGCCGCGGCAGCTGCTGAGGATGGTGGTGGCG  
CTGCAGTGCCTCGGCCTCACCGTGTCTCCACCTCAACGTGACCACCACCGCCGACCACCTGGCC  
TTGTACTCCCTCAGCCTCAAGATGGAGGACGAGTGCCGGCTGTGCGCGTGGTTCGACGACATC  
GCCGCCGCGGTGAACGAGATACTCGCCGATATCTCCGACGAGTGCGCCCGCGGGGGGCCAGG  
CCTACTGA

>JL8\_GRMZM2G131516

ATGCCACCTCCGCCACCACCACCCCTCTCACACCATATTGCCGCCGCTGTCTCCACCGCAC  
CTGCCTCCGCCCCCGCCGTCGTCCCAAATCACTTTTTGTTGCACTATCTTCATCAGTTGGATCA  
TCAAGAAGCAGCTGCAGCAGCTATGGTTAGAAAGAGACCAGCGTCTGACATGGACTTGCCGCC  
CCCCAGACGTACGTGACTGGCGACCTCTCAGATGTTACTGCAGCTGCAGCTGCAGGAGTTGG  
CGGCAGTGGCGCTCCAGCTCCGCTAGCGCACAGCTGCCCGCTCTTCCGACTCAGCTGCACCA  
ACTGCCTCCAGCGTTTTCAACACCACGCCCCCGAGGTGGACGTGCCCGCGCATCCGGCCCCCG  
CAGCCCATGCCCAAGCGGGAGGGGAAGCCACAGCGTCAACCACCGCTTGGGTGGACGGAATC  
ATCCGTGACATAATCGGGTCTCTGGAGGGGCGCGGTGAGCATTACTCAATTGATCCACAATG  
TGAGGGAGATAATCCACCCCTGCAACCCTGCAAGCCTCCTCGAGCTGCGCCTTAGGA  
GCCTGCTGGCAGCTGACCCCGCACCTTTGCCACCTCCCCCTCAGCCCCAGCAACACGCCCTGC  
TGCACGGGGCGCCAGCTGCAGCTCCGGCGGGCTTACTCTTCCACCACCACCCCACTGCCG  
GATAAGAGGAGGCATGAGCACCCGCCTCCATGCCAGCAGCAGCAGCAAGAGGAGCCTCACCC  
CGCACCCCAATCGCCAAAAGCTCCAACGGCGGAGGAAACAGCAGCAGCTGCTGCTGCTGCTCA  
AGCAGCAGCAGCTGCTGCTGCTAAGGAGAGAAAAGGAGGAGCAGCGCCGAAACAAAGGGATG  
AGGAAGGCCTGCACCTCCTCACCTGTTGCTCCAATGCGCTGAGGCTGTCAACGCTGATAATCT  
GGATGACGCACACCAGACCCTCCTTGAGATTGCTGAACTGGCGACTCCATTTGGCACGAGCAC  
ACAGCGTGTGCGAGCGTACTTCGCCGAAGCTATGAGCGCCAGACTCGTTAGCAGCTGCCTCGG  
CCTTTACGCTCCGCTCCACCTGGTTCCCCCGCGGCCGCAAGATTGCATGGTCGCGTTGCTGC  
AGCTTTTCAAGTGTTCAATGGTATCAGCCCTTTTGTGAAGTTTTACACTTCACAGCGAACCCAGG  
CCATCCAAGAGGGCCTTCGAGCGCGAGGAGAGAGTCCATATTATTGACCTGGACATTATGCAGG  
GTCTCCAGTGGCCGGGCCTTTTTACATCCTCGCTTCAAGGCCCGGAGGTCTCCTCGGGTCC  
GCTTGACAGGCCTGGGGGCCTCAATGGAGGCCCTGGAAGCGACGGGCAAAGGCTTTCTGAC  
TTCGCGGACACGCTTGGGTTGCCGTTCAATTCTGCGCTGTGCGGAAAAGGCAGGTAACGTC  
GATCCGGAAAAACTGGGTGTCACCAGGCGTGAAGCAGTCGCTGTGCACTGGCTCCATCACAGC  
CTCTACGATGTGACCGGTTTCAAGATTCAAATACCCTCTGGCTTATTCAGCGCCTGGCACCGAAGG  
TCGTACAATGGTGGAAACAGGACTTGAGTCATAGTGGCTCTTTTTTGGCGCGTTTTCGTGGAAAGC  
GATACTACTATTCCGGCCCTGTTTCGACAGCCTTGACGCCTCGTACGGTGAGGATTCCCCCGAG  
AGACACGTCGTTGAGCAACAACCTGCTTTCAAGAGAAATTAGGAACGTCCTGGCCGTGGGAGGC  
CCTGCCAGGACAGGCGACGTCAAGTTCGGCTCCTGGAGAGAGAAATTGGCCCAATCGGGCTTT  
CGTGCTGCATCACTGGCAGGGAGCGCGGCAGCACAGGCCAGTCTGCTCTTGGGCATGTTCCC  
GTCGGATGGCTACACCCTCGTGAAGAAAACGGCGCATTGAAGTTGGGCTGGAAGGACCTCTG  
TTTGTCAACCGCCAGCGCGTGGCGGCCGATCCAGGTGCCACCGTGCAGGTGA

>JL13\_AC215201.3\_FG008

ATGGTTTTCAAGGAGCAGAATAAGCGAGGAGCTTTGCATGAGAAGCTCAAGATTCTCCGCAGCG  
TACTCACTCTCATGCGGTAACCTGTCGTCATCTCCTTTTCTTTTACATGTTGTTTATTCTTTCTT  
CTTGATGATTACTCATCCATCGACCTCTTGTTATGTACGTGAACACGAATTCTCGTTTTCTCTCTC  
TCTCTCTCTCTCTCTGAAAGAACACTCATCGTGCTCTAGCTAGTTATGTAGGTGAAAGAATCT  
CAAGCTAATAATAGCTAGTGTGTCATGCACGGTAACTGTTTTTCTTTCAGTTGTTGTTTTCTTTT  
ACGTATGAGGCAATGATCGTCGTTTACATTATCATTTTTCATCAGTTTGTATCCACACAGCCATT  
CATGCCTTGCATGTTTTTCTCTGAAAGAACAGATGCTTTTCGTACCAATATTATTACATATCAGT  
CATGCTGTGTGTATATCTACGTACCATTACCTTTTTCAGACCATTCCGATGCTGTCAAGTTATAT  
GCAACACGTACGTGTGTGTCACGCAGGGGGATAAAGTGTGATAATAGCGGACGCGTCATCGT  
ACATCAAGGAACTAAAGCAGAAGATCGCGAAGCTAAGCCAAGAGATGGCATCGTCGTCTCCGC  
AGCACGCCACTACTGGTGTCTGCCAACAACAACCGTCTGTCGTGTCGGTGGTGGAGTCC  
TGCTGGACAAGAAGGGCCGTTTCTCTGTCAGTGTGTTTATGGACGAGAGCTGCGGCCCGCCGC

CGGCCGGGCTACTCGCTTCCGTCCTCGAGGCCTTCGACGACATCGGACTCACGGTGTCTCGAG  
GCTAGGGGCTACCTGCGCTGTTCCCTTTTCGGCTAGAAGCTGTAGGAGAGGTGCGATGCGACTGC  
GAACGAGTACACATTATTACACCGCGCGTACCGCCGCAAACGCGGTAGTACGCATGCATGATTT  
AATCACTTCTTTGTCTTGCTTCTTTAATCTCTCTTGTTTTATTTGCTGCTTTGTTTGTTCATTCC  
AGGAAGTAGTAGTAGATGGGGCCTCATCATCGACGCGCACGCGGTGGAGCAAGCAGTAGTTC  
AGGCAATCAAGAATTGCCCTGCAAATTA

>JL15\_GRMZM2G016477

ATGCCGCTGTGCGGGTCTGTTCCCTGCTGCTCATGCTCGCGCTGGCGCCGCTTGCCTCCCTG  
GCCGCCCCGGCGCCGGCGCCGCGGTGGCGAGGACGGCCGGGTGCAGGCGGAGATCGAC  
GCGCTCCTCGGTTCCGCGCGGCCCTGCGCGACCCCTACGGCGCCATGTCCGGATGGGACGC  
GGCCTCCCCCTCCGCGCCCTGCTCCTGGCGCGGCGTCCGCTCTCGGGCCCCATCTCGCCGGCGCT  
GGGCGCGTCTGAGCTGCAGCTCCCGCGGCTCCGCTCTCGGGCCCCATCTCGCCGGCGCT  
CGGCTCGCTGCCGTGCCTCGAGCGGCTCGGCCTCCGGTCCAACGACCTCTCCGGCGCCATCC  
CGGCGTCTGCTGCGTCACTCCCTGCGTGCCGTCTTCCCTCCAGTCCAACCTGCTCTCCG  
GACCCATTCCCCGTCGTTCCCTCGCCAACCTACCAACCTCGACACTTTCGACGTGTCCGGCAA  
CCTCCTGTCCGGCCCCGTCCCCGTCTCATTTCCCTCCCGGCTTGAAGTACCTCGACCTCTCCTCC  
AATGCGTTCTCCGGAACCATCCCGGCGAACATTGGCGCATCCATGGCGAACCTCCAGTTCTTGA  
ACCTGTCCTTTAACGGCTCCGGGGTACCGTGCCGGCGTCCCTGGGCAACTTGCAGAACCTGC  
ATTACCTCTGGCTGGACGGGAACCTTCTCGAGGGGACCATCCCGGCGGCGCTGGCCAACCTGCT  
CGGCGTCTCCACCTGAGCCTTCAAGGGAACCTCGCTCCGCGGCATCCTGCCGTCTGCGGTAG  
CCGCGATACCCACGCTGCAGATTCTCTCGGTGTGCGGGAACCAGCTCACCGGTACCATCCCGG  
CCGAGGCGTTCGGCGGCCAGGGGAACCTCGTCTCTGCGCATCGTGCAGCTCGGCCGCAACGAG  
TTCTCTCAGGTGGACGTGCCGGGAGGTCTCGCCGCGGATCTTCGGGTGGTGGACCTTGGCGG  
CAACAAGCTCGCTGGTCCGTTCCCGACTTGGATTGCTGGGGCGGGAGGGCTGACGCTGCTCG  
ACCTCTCGGGCAATGCGTTCACAGGCGAGTTGCCGCCAGCGGTCCGGCAGCTCAGTGCCTG  
CTTGAGCTGCGCCTCGGCGGCAATGCTTTCGCTGGCGCCGTGCTGCGGAGATTGGCAGATG  
CAGCGCACTCCAGGTGCTTATCTCGAGGACAACCACTTCCACCGGCGAGGTGCCATCAGCTCT  
AGGTGGTCTCCCGAGGCTCAGGGAGGTCTATCTTGGTGGGAACACTTCTCCGGCCAGATTCC  
GGCGACCTTGGGGAATCTGGCGTGGCTAGAGGCATTGTCCATACCCAGGAACAGACTCACTGG  
TCGCCTTTCTCGTGAGCTTTCAGCTGGGAAACCTGACGTTCTTGACCTATCCGAGAACAAC  
CTCACCGGAGAGATCCCTCCGGCCGTGCGCAATTTGTTGGCTCTCCACAGTTTAAATTTGAGCG  
GCAATGCCCTTTTTGGCCGCATTCCAACGACCATTGGCAACCTCCAGAACCTGCGAGTTCTTGA  
TCTCTCCGGGCGAGAAGAACCTCTCTGGCAATGTCCCGGCGGAGCTTTTCGGCCTACCGCAGCT  
GCAGTACGTGTGCTTCTCGGACAACCTCTTCTGCGGATGTTCTGAAGGTTTCAGCAGTCTC  
TGGAGTCTGCGCAATCTCAATCTCTCCGGCAATCTTTCACTGGGTCAATACCGGCGACGTATG  
GGTACTTGCCGTCACTTCAAGTGTGTCAGCCGCACACAACCATATTTCTGGCGAGCTACCAGC  
CGAGCTCGCCAATTGTTCCAACCTCACTGTGCTTGAAGCTCAGTGGCAACCACTGACCGGCTC  
CATCCCGAGGGACATCTCACGCCTTGGTGAATTGGAGGAGCTTGACCTCAGCTACAATCAGCTT  
TCAGGCAAGATACCACCAGAGATCTCCAACCTGCTCATCACTCACCTTCTCAAGCTTGACGACA  
ATCATTTTGGCGGAGACATAACCAGCCTCTGTTGCCAGCCTCTCGAAGCTACAGACGCTTGACCT  
GTCGTCCAACAATCTTACCAGGAGCATCCCTGCTTCAATTGGCTCAGATTCCCTGGCCTTTTATCAT  
TCAACGTGTACACAACAAGCTTTCCGGCGAGATACCGGCGATGCTCGGCTCCCGCTTTGGCT  
CTTCGTGAGCATATGCTTCAACTCAGACTTGTGCGGTCCGCCGTCCGAGAGCGAGTGCAGGCG  
TGTACCGGCGACGGCGGAGGCGGAGGGTGCAGCGCCTGGCTCTGCTTATCGGTGTGGTG  
GCTGCTGCGGCGTTGCTCGTTGCGCTGTTCTGCTGTTGCTGCGTGTTCAGCTTGATGGGATGG  
AGGCGTCCGTTTCGTTGAGAGCCGTGACGGTGTCAAGAAGAGAAGACGCAGCCCAGGACGCGG  
CAGCGGGTCCGAGCGGCACGAGCACGGAGAACGGCGTCCAGCCAGCCGAAGCTGATCATGTTCA  
ATTCAGGATCACTTACGCTGACACGGTTGAGGCGACCCACCAGTTCGACGAGGAGAACGTGC  
TCAGCCGAGGCCGCCACGGCCTCGTGTTCAAGGCTTGTACAGTGACGGCACCGTGCTGGCGA  
TTCTGCGGCTCCCGTCCAGGTCTGCCGATGGCGCCGTGGTGATCGACGAGGGATCGTTACAGGA  
AGGAGGCCGAGTCTCTCGGGAAGGTGAAGCACAGGAACCTCACGGTGTCCGTGGCTACTATG  
CCGGGCTCCCGCGGACGTCCGGCTGCTGGTCTATGACTACATGCCCAACGGCAACCTCGCCA  
CGCTGCTGCAGGAAGCGTCAACCGGGACGGCCACATTCTCAACTGGCCGATGAGGCACCTCA  
TCGCGCTCGGCGTCTCGCGCGGTCTTGCCTTCTGCACCAGTCCGGGGTGGTGCACGGCGAC  
GTCAAGCCGCAGAACATTCTTTCGACGCGGACTTCGAGCCGCACCTGTCTGATTTCCGGCCTCG  
AGCCGATGGTGGTGAAGTGCAGGCGCCGCGCCGCGCTCGACATCGGCTGCAACTGCAACACCA  
CCCGTGGGCTCCCTCGGCTACGTGGCCCCGACGCGGCGCTGCCGGGCGAGGCCACGAGGG



AGGGCGACGTGTACAGCTTCGGCATCGTGCTGCTGGAGCTCCTCACGGGTCGGCGCCCCGGC  
ATGTTCCCGGGGAGAAGGAGGAGGAGGAAGAGGACATCGTGAAGTGGGTGAAGCGGCA  
GCTGCAGCGCGGCCGCGTGGCGGAAGTCTGGAGCCGGCCTGCTGGAGCTGGACCCGGAG  
TCGTCCGAGTGGGAGGAGTTCTGCTGGGCATCAAGGTCGGGCTGCTGTGCACCGCGTCCGA  
CCCGCTGGACCGCCCGGCCATGGGCGACGTGGTGTTCATGCTGGAGGGCTGCCGCGTCGGCC  
CGGACATCCCGTCCCCGTCTCCGCCGACCCACCTCCAGCCGTCGCCGGCCTGA

>JL22\_GRMZM2G480386\_CDS

ATGCAGGGGCAAGTTGCTGGTGACGACGCAGGTGGTGCAGGCAGCCCTAGCAGGCGGGCGGGA  
GAGCTCGGCCGCCGCGCGCTTGGTGCCTGGCCCATCATCGTCGGCGCGGGGCGTCCGGG  
CTGGCCGTGGCGGCGACGCTGAGCCGGCACGCGGTGCCCTTACGGTGTGGAGCGTTCCGA  
CGGCATCGCCGACCTGTGGACGAACCGCACGTACGACCGGCTCCGGCTGCACCTCCCCAAGG  
TGTTCTGCGAGCTCCCGCACGCCCGCTTCCCGGCCGACTTCCCCACGTACCCGACGAAGCAG  
ACTTCTCCGGTACCTCCGCTCCTACGCCGCGCGCTTCCCGTGGCCCCGCTGTTCCGGGCGCA  
CGGTGACCTGCGCGCGGTACGACGCGGAGGCGTCTGCTCTGGAGGGTCACGGCGGTGTCTG  
GTCGTGACTGCCGCGGGCGGCGGCGGCGGCGGAGACGACGACTGAGACCGAGTACGTG  
TCGCCGTGGCTGGTGGTGGCCAGCGGGGAGAACCGCGGAGGTGGTGGTGGCCACGGTGAAGG  
GGAGGGAGAGGTTCCGGCGGGGAGGTGCTGCACTCCAGCACGTACAGGAGCGGGGAGAGGTT  
CAAGGGCATGAGGGTCTGGTCTGGGCTGTGGCAACTCCGGCATGGAGATGTGCTTGGACTT  
GTGCGAGCACGGTGCCATGCCCTTTCATGTCCGTGAGGAGCGGGGTGCACGTTCTGCCGAGAG  
AGATGTTCCGGGCGCTCAACGTTCCGCATCGCCATGAAACTGCTCCGATGGCTGCCGATCAAGA  
TGGTGGACAGGCTCCTGCTCCTGGTGGCGAGGATGGTCCCTGGGTGACACCGAGAAGCACGGG  
CTGAGGAGGCCCAAGCTAGGCCCGCTGGAGATCAAGAACGTCACCGGCAAGAGCCCTGTTCTG  
GACGTGGGAGCATGGTCTTCATCAAATCTGGAAACATCAAGATCGTGCCAGAAGTGGAGTCAT  
TCACCGGCAGCAACGGGGTGAAGTTCGTGAACGGCGACGAGATGGCCTTCCACTCTGTCTATCT  
TCGCCACCGGCTACAGAAGCAACGTCCTTGGTGGCTCAAGGATGACGGCGAGCTGTTACCG  
AGGACGGAAAGGCGAAAGCTGAGCAGCCGAGCGACGACGACAGGTGGAGGGGTCCCAACGG  
GCTGTACCGCGTGGGGTTCTCCGGCCAGGGCTTGGTCCGGCGCTGGCGCGGACGCGCTGAGG  
GCCGCCCGGACATCGCCGGGAGGTGGCAGGCGGAGGTGGCAGCAGCGGTGGCTGGAGCCA  
AGGTTCTCCGGCCTCGGTGTAG

>JL22\_GRMZM2G480386\_GENOMIC

ATGCAGGGGCAAGTTGCTGGTGACGACGCAGGTGGTGCAGGCAGCCCTAGCAGGCGGGCGGGA  
GAGCTCGGCCGCCGCGCGCTTGGTGCCTGGCCCATCATCGTCGGCGCGGGGCGTCCGGG  
CTGGCCGTGGCGGCGACGCTGAGCCGGCACGCGGTGCCCTTACGGTGTGGAGCGTTCCGA  
CGGCATCGCCGACCTGTGGACGAACCGCACGTACGACCGGCTCCGGCTGCACCTCCCCAAGG  
TGTTCTGCGAGCTCCCGCACGCCCGCTTCCCGGCCGACTTCCCCACGTACCCGACGAAGCAG  
ACTTCTCCGGTACCTCCGCTCCTACGCCGCGCGCTTCCCGTGGCCCCGCTGTTCCGGGCGCA  
CGGTGACCTGCGCGCGGTACGACGCGGAGGCGTCTGCTCTGGAGGGTCACGGCGGTGTCTG  
GTCGTGACTGCCGCGGGCGGCGGCGGCGGCGGAGACGACGACTGAGACCGAGTACGTG  
TCGCCGTGGCTGGTGGTGGCCAGCGGGGAGAACCGCGGAGGTGGTGGTGGCCACGGTGAAGG  
GGAGGGAGAGGTTCCGGCGGGGAGGTGCTGCACTCCAGCACGTACAGGAGCGGGGAGAGGTT  
CAAGGGCATGAGGGTCTGGTCTGGGCTGTGGCAACTCCGGCATGGAGATGTGCTTGGACTT  
GTGCGAGCACGGTGCCATGCCCTTTCATGTCCGTGAGGAGCGGGGTAAGTTACCAGCAGCTAAG  
CTAGCCCTCTTTTCCATCTTCTTCTTCTATATATTAATCCTCTAGCTACTAGCTGCTTAATT  
ATATATCAGCTTGCTATATACATAACTGTTGGACACACTTGTGATCCGAGTTTCATGTACTCC  
GACATACATTGTTGCCATTTATCTTACTTGATCACGTCATATCTCTAGTCGCTATCTATTTTAAGA  
AATTTAAAAAATGCAGTAACCTTTTCAGTTTCTAGCTATATAGAAGTGTGATATTTATATATAAT  
GTTGCATTGCTAGTCATTAATATATAATTCCATGAAGAAGTGAATAGGTTCTATATATGTGTGT  
GTATGGCTTTTACTACTGTGTACTGGAGCTTAATCATATATGGACCAATAATGCGCATCGTAT  
GTCGTGCTTATGAAACGAAACAGGTGCACGTTCTGCCGAGAGAGATGTTCCGGGCGCTCAACGT  
TCGGCATCGCCATGAAACTGCTCCGATGGCTGCCGATCAAGATGGTGGACAGGCTCCTGCTCC  
TGGTGGCGAGGATGGTCTGGGTGACACCGAGAAGCACGGGCTGAGGAGGCCCAAGCTAGGC  
CCGCTGGAGATCAAGAACGTCACCGGCAAGAGCCCTGTTCTGGACGTGGGAGCATGGTCTGTT  
ATCAAATCTGGAAACATCAAGGTGAGGGGCTGCTGTCAAAGGGTCACACTGAAATAAAGAAGAGT  
GACGTCGTTCTGTCATGGGAATGGAGGAGTGTACTAGGAGTGCATCCATCCATGCATCTTTCAT  
TCATTCCTTCTGTTGCTTCTTTCGCATGTCATGCCAACGCTAGCTTTTCACTTTTGAGGTTTATA  
CAACATTCTTTTCCCTATCCCTTTGTTGTTGGTGGTAGTGTGTGCGTGGGCTGATGAGTGTGAAA

ACTACTAGTTTTTACAGTTTTATCCGCATGCATGCATGCCTCTTTGCATGGACCATGGCTTTATTA  
TTATATATTTTTTACACCCCTCCCCGTCCCCGGTCTCTTCTTGGCTCTACTAGCTAGGGTGCCTGCC  
TGGTGCATGCAGATGCAGGCGTCTGTACTTGGGCGTATAGCATCATGCTTGCATGACAACAAAA  
TAACTGCTGGCTGAACAAAAATGGCATCTCCATGGACCATTGTCCGATGCCCTTATTTGCGTGCT  
GATGATGGCTAAGCTAGCAGCTAACTTTGTGGCAAATGTGCAATCATGTGATGGTGGTCCGAT  
GTATATATATTTCCATTTACCTAATTTCTGCGTTCAAACATGCATTTTATTTGTCCATACACATAAC  
ATATTTATGTGTGCACTTGTGATGATGCAGATCGTGCCAGAAGTGGAGTCATTCACCGGCAGCA  
ACGGGGTGAGGTTGCGTAACGGCGACGAGATGGCCTTCGACTCTGTCATCTTCGCCACCGGCT  
ACAGAAGCAACGTCCCTTGTGGCTCAAGGCACGTACGTGTCGCCGGCCGCGCGCCGCCGCC  
TATAGCTAGCTAACTGATCGACACTCAGCTCCTGTTACTGATCGGTACTIONACTACTACCTACGTGG  
TGGGCGTGCACATGTATGCAGGATGACGGCGAGCTGTTACCGAGGACGGAAAGGCGAAAGC  
TGAGCAGCCGAGCGACGACGACAGGTGGAGGGGTCCCAACGGGCTGTACCGCGTGGGGTTCT  
CCGGCCAGGGCTTGTCTCGGCGCTGGCGCGGACGCGCTGAGGGCCGCCGCCGACATCGCCGG  
GAGGTGGCAGGCGGAGGTGGCAGCAGCGGTGGCTGGAGCCAAGGTTTCTCGGCCTCGGTGT  
AG

>JL23\_GRMZM2G069365

ATGGAGTACAAGAGATCATCGCATGTGGAGGATGAAGACGAGGATGAGCTGGAGGAGGAGGA  
GGAAGAAGACGAGGAAGAGGAGGAGGACGAGGATGAGGAGGCCAGAAGCCATCGCTACACCA  
CGGCGGCGGCGGCACCCCTTAGGCACTCCACAGCAGCAGGAGGTGCAAGCCCAAGCTCTTGGG  
CTCGGCTCGCACGCCCTCCCTGATGGACTCCGCCGCCCTTCTCGAGGCCGCTCTTGCCTCCCAAC  
TCATCTCTGGTGACGCAGCCACCGCTGCCTCCACCAGGCTTCTGCGGCTCACCGCCAGCCG  
CCGCAGCTCCATCCGAGGAAAGCGGAGAGGGAGAGGGAGAGGGACAGAGCCGCGGGAGCGC  
AGCAGCCCCAGCTCCGGCGCCACCAAGAACCAGTGAGGAATAATAATGGCGTTCTCGGCGGCG  
GCGGTGGCGCCGCGCCCCCATCGGCGGCCTCTTCTACGTTCCGGCCTCGCGTCCGTGCGGCC  
GTGGTGGAGGCACCCAGTGGCGGTACCGTGAGTGCCTGCGCAACCACGCGGCGCGGCTTGG  
CGCGCACGTGCTCGACGGCTGCTGCGAGTTCATGCCGTCCGGGAGCGACGGGGCCGCCGCC  
CTGGCCTGCGCCGCTGCGGCTGCCACCGCAGCTTCCACCAGCGCAGGCGATCCCCGGCG  
GCGTTGCCGCGCGGCGGCGGCGGTGGTATCGCCCTCGGCGGTGCCGGTGGTGACCCCCACAGC  
CCGCGCCAGCGCCAACCTCGTCCCGTGTATGCCGCTGCTCATGGCCCCGCCGCACATGCATAC  
GCGCCCCGCCGCAGTCCCGGCGTCCCCGGCGTCCGCGCCCGCCGCGCTGACCGAGTCGTGCG  
AGCGAGGAGCTGCGAGGCCACGCGCCCGCGCACCCGGCCGCGCCGCCGCCGCCGCCGCCAC  
ACGCGCAGGTGGTGGCCCTAGCGGGGTGGGCTTCCGCTCCCCCGCGCCGAGCAAGAAGCGT  
TTCCGGACCAAGTTCACGGCGGAGCAGAAGGACCGCATGCGCGAGTTCGCGCACCGCGTCCG  
CTGGCGCATCCACAAGCCCGACGCCGACGCCGTGGACGTCTTCTGCGCCAGGTGCGGCGTCT  
CCCGGCGGTCTCAAGGTGTGGATGCACAACAACAAGCACCTCGCCAAGGTCCCGCCCTCGC  
CCCCATCCTCCCAGGCCAGGCCAGGCCAGCCCCGCGCCGCCGCCGAGCAGCATCGCCAC  
CACAACCACCACCACCTCCACCTCCGCCGACACACATCCACCATCACCACCACCCGCCGCCG  
CCGCCGACGAGGAGCAGCAGCATGATATGCATGAGTGA

>JL24\_GRMZM2G417229

ATGGAGTACAAGAGATCATCGCATGCGCAAGAGGAAGAAGAGGACGAGGAGGAGGAGGAAGA  
AGAAGACGACGAGAACGAGGAAGAAGAGGAGGATGAGGAGGAGGCCAGAGGCCTTCGCTACA  
CCACGGCGGCGGTGGCACCCGTAGGCGCTCCACAGCAGCAGGAGTGCACGCCCAAGCTCTT  
GGCCTCGGCTGCTCACACCCCTCCCAGCTGATGGATTCTGCCGCTTCTCGAGGCCGCTCTTG  
CCTCCCAACTCATCTCTGGTGTGATGCAGCCACCGCTGCCTCCACCAGGCTTCCCGCCGGCTCAC  
CGCCAACAACCGCCGCATGCGCAGCTCCATCCGAGGAAAGCGGAGAGGGAGAGGGACAGAGC  
CGCGGGAGCGCAGCCCCATGTCCGGCGCCACCACCAAGAACCAGCCAAGAATGGCGTTCTCG  
GCGGTGGCGCCGCGCCAACGTGCGCACCCCTTACGCTCGGCCCTCGTGCCCGTGGTGAAGCG  
GCCAGCTGTGGAGGTACCGGGAGTGCCTGCGGAACCACGCGGCGCGGCTTGGCGCGCACG  
TGCTCGACGGCTGCTGCGAGTTCATGCCGTCCGGGGGCGACGGGGCCGCCGCGCTGGCCTG  
CGCCGCTGCGGCTGCCACCGCAGCTTCCACAGACGCGAGGCGGTCCCCGGCGGCGGCGGTG  
GCGGTATCGCCCTCGGCGGCGGTAACCTCCACCCCCACCGCCGGCGCCAACCTCCTCCCGCGC  
CATTCCGCTGCTGCTGGGCCCGCGGCACATGCACACGCGCCCGCAGCACCACGTGCCGGCG  
TCCCCGGGTGTCCGCGCCCGCGCGCTGGCCGAGTCGTCCAGCGAGGAGCTGCGCGGCCCC  
GCGCCCGCGCCCGCGCCGCCGACGCACGCGCAGGTGGCCGTAG

>JL25\_GRMZM2G425236

ATGGATCAACAGCAGCACCAGGAGCGGCCGTGGGAGGTGTACCGGGAGTGCATGCGCAACCA  
CGCGGCGAAGCTCGGGACATACGCCTCCGACGGATGCTGCGAGTACACCCCCGACGACGGCC  
AGCCCGCAGCGATGCTCTGCGCCGCCTGCGGCTGCCACCGCAACTTCCACCGGAAGGCGTTC  
CTCGCCGACGCTGCGGGCGGGAGCGCACGGCGGGCGCGCACGGGGCAATGCTGCCCTCTCCCG  
GCGCGTCCCCGGGCTACGGCATGCACCACATGGCGATTGCTGCGGCCGGCATGGGCGGTGAC  
GCCGGCGCGCACGGCTCCGGGTCCGGGGGACAGGCGCCGGACGCGGACCAAGTTCACGGACG  
AGCAGAAGGAGCGCATGGCGCGGTTGGCGGAGCGGCTCGGCTGGCGGATGCCCAAGCGGGA  
GCCCGGCCGCGCGCTGGGGGACGACGAGGTGGGCCGCTTCTGCCGGGAGATCGGGGTACC  
AGGCAGGTCTTCAAGGTATGGATGCACAACCACAAGTCCGGTGGTGGCGGCAGCCAGGGCGA  
GGGCGCCAGCGCTGGCGCTGCCGGAGCCGCTCAGACGACGTCGTCCACGACGCGTGGC  
GGCGGCGGCGGCGGCGTGTGGAGGAGGCGGGAGCATGTCCACGGCGATGATGGGCGCCG  
ACGTCGAGGACGACGAGGAGGTGAGGGGCAGCGAGATGTGCATGTAG

>JL26\_GRMZM2G119359

ATGCACCGTGGCCGCAACCGTTCAAGAAAGCCTGTGGAATCCAAGACCGCCTCCTCGCCGCC  
CAGCTGTCCACCGTCGTACCACCACCACCACCCGGGAGGCCGCCGCCGCGACGCCCTTGA  
GTCCCTCGCGGGGGCGGGGGTAAGGCTCACGGCCTGTCCCTCGGCGGCGGGGCTGGCTCG  
TCGCACCTCAGCGTCGACGCTTGAACGCTCACTTTCGCTATGGCAGCAAGTATGGTTACATTC  
GCAGTTCCTTTTTTGTGGTTCTAGCTGTTGTTGCTATCGAATGGCCATGATGCTATAGTTTTCG  
TTGGTTCTACACTATTATCGCAAAGGAGAATCACACCGACTCACTCACTCTTCAACGGCAAATG  
CACTTCTGCCACTGGCTTCTTGCAGTATTAGCCCTTCTACTGTACAATATAGAAATCTTTTTGCAGT  
TCTGTTGTATTAAGTGAAGTGCCTGCGCTGGTATGCCCTGGGCCCTGGCTGCTTCTGCTATCTT  
AGATGTCTATAAAATTTTATATATTTGCATGCTCTGAACAACCTTGGGCTGGCGGATGCCCATGTC  
CATGCCGCTACACAACCTTAGGTCTGTACTAGTGTTCAAACAGATTTTCTTATTGGCCCCCTATTT  
TGTAATCCGTTTCTTTCGGATTCAATTGTTTTGTGGGTTTGAATTTCTATAAGGATTTGCGCATCA  
AATATTGATATGACTTCAAGACAATATTGCAGTTCATGTCTGAATTTGCATCCTGAGCTTGATTT  
TCTGTGAGTTGACTTTAATAGCTATTTATTTGCACTTGTACATCTATTCCACTTCATACCAAACA  
AACCACCATGTCTTGCCGGTTCCTGTAGGCAGAAATATGACACTAGATAGACTCCAAAGCTATA  
GTGCCAGGCTGACAAGTGTCTGTGAGTTCATAACTTTTCGTTGGCAACTTGTGATTGTCACAT  
ACTATCCATAACTAATTGACTGTGCAGGTACCCTCTTGGAGCTAAATCCGATGCTGGCGAGCTG  
AGCTTCTTCTCAGGAGCACCAGGGAACCTCAGGGGCTTACCATTGATTCTCCAGCAGATAACT  
CTTGGCACTCCCTGCCATCCAACGTGCCCCCGTTTACACTGTCCAAGGGCAGAGACTCTGGCC  
TCCTGCCCGGTGCCTACTCCTACTCCCACATTGAACCACCGCAGGTGCTCGGCCAGGTACCA  
TCGCCTCGCTGTACAGGACCAGGAGCGCCACCAGTCGTGTTTCAGCAGCGGCGGGGCCGGC  
GCTGGTGGATTGCTGGGGAGCGTGAAGCAGGAGAACCAGCCGCTGAGGCCCTTCTTCGACGA  
GTGGCCTGGGACGCGGGACTCGTGGTCCGAGATGGACGACGCGAGGTCCAGTAGGACCTCCT  
TCTCGACGACCCAGCTCTCCATCTCCATTCCGATGCCCAGATGTGAGTTGTTTCATACTGATCTC  
ATCTTAGGAACCCGACGTCCTTCTGTGTGCTTCCCAATCGTGCTTGGATGTGTTCTGATGACA  
GCAGCAATCACAATTGTTTCTGCAGGTGATTGA

>JL27\_GRMZM5G893117\_CDS

ATGATGATGATGAGCGGTGAGCGGCCACCGCGGGGCGGTACCCGTTACGGCGTCCGAGTG  
GCAGGAGCTGGAGCACCAGGCGCTCATCTACAAGTGCCTGGCGTCCGGCAAGCCCATCCCGT  
CCTACCTCATGCCACCGCTCCGCCGCATCCTCGACTCCGCCCTCGCCACGTCCCGTCCGCTCG  
CCGCTTCCCGCCGCAACCCTCGCTGGGGTGGGGGGGCTGCTTCGGGATGGGCTTCAGCAGG  
AAGCCC GCCGACGAGGACCCGGAGCCCGGGCGGTGCCGGCGCACGGACGGCAAGAAGGCGC  
TGCTCCAAGGAGGCGTACCCGGACTCCAAGTACTGCGAGAAGCACATGCACCGGGGCAAGAAC  
CGTTCAAGAAAGCCTGTGGAAATGTCTTGGCCACGCCGGCGCCGGCCTCCTCCGCCACAAGC  
GCCGCCGCCGCCACCTCCTCGTCCAGGCGCCGTCTACCACAGCCCGGCCCCCGCCGT  
GCCGTACCACGCGCCCTACGGCGCCGCGTACCATCACACGCAGACGCAGGTGACGATGAGCC  
CCTTCCACCTCCTCCACCTCGAGACCACCCACCCGCACCCGCCGCCGCCGCCGCCGCCGCC  
TACTACTACGCGGACCAGAGGGACTACGCCTACGGCAAGGAGGTGGCGGAGCGCGCCTTCTTC  
TCCGACGGCGCGGGCGAGAGGGACCGGCAGCAGCAGGCCGCGGGGCAAGTGGCAGTTCAAGC  
AGCTCGGGACGATGGAGGCGACGAAGCAGCCGTGCACCACGCCGCTGCTCGTCCCCGCCGCC  
GGGTACGGCCACGGCGCGGCGTCCCGTACGGCGTCCGTCAGGCCAAGGAAGACGAGGAGG  
AGGAGGAAACGCGGCGGCAGCAGCAGCACTGCTTCGTTCTTGGCGCCGACCTGCGGCTGGCG  
GAGCGGCCGTCCGGGGCACATGA

>JL27\_GRMZM5G893117\_GENOMIC

ATGATGATGATGAGCGGTGCGAGCGGCCACCGCGGGGCGGTACCCGTTACGGCGTCGCAGTG  
GCAGGAGCTGGAGCACCAGGCGCTCATCTACAAGTGCCTGGCGTCCGGCAAGCCCATCCCGT  
CCTACCTCATGCCACCGCTCCGCCGCATCCTCGACTCCGCCCTCGCCACGTGCGCGTGCCTCG  
CCGCCTTCCCGCCGCAACCCTCGCGTACGCGACTACTGTCTCTCTAATCTATGCGGGCCGCAT  
GTGTCTTTATTTCTGTATATTCTGGTTACGTCCGCGTTGTTGTTGCCTTTGCATGCAGTGGG  
GTGGGGGGGCTGCTTCGGGATGGGCTTCAGCAGGAAGCCCGCCGACGAGGACCCGGAGCCC  
GGGCGGTGCCGGCGCACGGACGGCAAGAAGGCGCTGCTCCAAGGAGGCGTACCCGGACTCC  
AAGTACTGCGAGAAGCACATGCACCGGGGCAAGAACCCTTCAAGAAAGCCTGTGGAAATGTCC  
TTGGCCACGCCGGCGCCGGCCTCCTCCGCCACAAGCGCCGCCGCCGCCGCCACCTCCTCGTC  
CCAGGCGCCGTCTACCACAGCCCGGCCCCCGCCGTGCCGTACCACGCGCCCTACGGCGCCG  
CGTACCATCACACGCAGACGCAGGTGACGATGAGCCCCTTCCACCTCCTCCACCTCGAGACCA  
CCCACCCGCACCCGCCGCCGCCGCCGCCCTACTACTACGCGGACCAGAGGGACTAC  
GCCTACGGCAAGGAGGTCGGCGAGCGCGCCTTCTTCTCCGACGGCGCGGGCGAGAGGGACC  
GGCAGCAGCAGGCCGCGGGGCAGTGGCAGTTCAAGCAGCTCGGGACGATGGAGGCGACGAA  
GCAGCCGTGCACCACGCCGCTGCTCGTCCCGGCCGCCGGGTACGGCCACGGCGCGGCGTCCG  
CCGTACGGCGTCGGTCAGGCCAAGGAAGACGAGGAGGAGGAGGAAACGCGGCGGCAGCAGC  
AGCACTGCTTCGTTCTTGCGGCCGACCTGCGGCTGGCGGAGCGGCCGTGGGGGCACATGA

>JL28\_GRMZM2G114893

ATGGCGACGGCGTGGGTGCGCTCGCTCAGCTGCAGGTCCTCCTACGCCGTACGGACGCCGC  
CATCGCGCCGTACCCGGCCAAGAAGCCGCCGCCGCAGCCGCTCCCCTTCTCCTGCGCCAGCG  
CCACTGCGGCGGCGGCGGACGTGATGGACGCCGTGGCGTACGCCATCATCAGGCCAGGCG  
GAAGAAGCTGGGGAGGGAGAGGGAGAGGCGGAAGGAAACGCGAGAGCCGCGGCCACGGCCC  
AAGAAGAAGCCCAAGCCCATGGCGACGAAGGACGCGGCCGCCGCCGCCGGGGCGCCGCTGT  
CGTTCATGCCGTGCGCGGCCGCCGGGCCCGCCGTGAGCTCGGCGTTCCTCACGATGGCGGAG  
CTGCCCGAGGGCCACTCCTCGCGGCGTGTGCTGGAGCTCATCTTCGCGTCCGGGTGGGCCGA  
CGCGGCGGGGCGCCCGTCCCGTCCCGTCCCGGCGGTGGAGGCGCTGTTCCGCGTGCAC  
AGCGCGCCGCGCGCGGTGGCGCGGTTCAAGAGGCGCGCCAGGCGGCCCGCGCGCGCGGC  
GCCCGGCGCGGTGCGGCGCCGACGGCAACGAGATGATGCGGTTCCAGTGCCGCGCGCCCG  
GCGGGCGGGGTGTTCCGGCGCGGGCGTCCGCTACCTGCCGCCCTCGGCGCGTCCGGTCTCTGCAGT  
GCGCACGTTTCGCTGCAGCGGCGCCGCGCACGCCAGCGCCGCCGCCGCCACCGCCACCGCC  
GGCCGGCGGGCGATGCTGGTGTGCCGCGTCATCGCCGGCCGCGTCTGCCCGCCAACCACC  
CGTCTCGCGCCACGCCACGGATCCGCTGCGACCGCCTATGACTCCGTGGACATGGGCAAC  
GGCGAGCTGGTGGTCCTGGACAGCCGCGCCGTGCTCCCCTGCTTCCTCATCATCTACAAGGTC  
TAG

>JL29\_GRMZM2G178182

ATGGCAAGCTTATTCCCACAGCTCGCGCAGATGGAGCACGGCGTAGCCGGCGCCTCCCATGGC  
GCGCCGAGCTTCTGTTCTGCAATGGCGCAGGTGCAGCCACGGCAGACTCAGCCTCGCTAGAG  
ACCTCGTCCGGTGTCTCGACACCTCCCACGAGGCGGAGGCGCTGATTCTGGCGGTAGGAAG  
GCCCCGACGAAGCCCAGGGAAGACAGCGCCAGCGCCAGCGCCAGCTTCAGCTTCAGCTCTGC  
GCACTCCAAGGACTCGAGCTCGAAGGGAAGCACCAAGAATAGGGGAGGGAAAAGAGGCAGAA  
GCAGCAAGGAGGTAGACGAGGAGGAGGAGCCCAAGGGGTACATACACGTCAGGGCAAGGAGA  
GGGCAAGCCACGGACAGCCACAGCCTTGCAGGAGAGGGTGGAGGAGGAGAGGATCAGCGAGA  
GGATGAGGGTGTGTCAGGCCCTGGTCCCTGGCTGTGATAAGGTCAGTGGAAAAGCCCTCGTTT  
TGGACGAGATCATCAACTACGTGCAGTCCTTGCAGAACCAAGTCGAGTTCCTTTCCATGAAGAT  
CGCTTCACTGAGCCCTGTGCTGTATGGCTTTGGCATGGACACTACTGACGCTTTCAGCACTGAC  
CATACTACTCAAAAATCGAAGGGATGCTCCAGCTCCACCACGAGGCGCTTGCAGGTGCCTAGCT  
CTGCCCTGAGCAGACCTCCATTTCGAGGCTATCGCGGACAGTACGCACGCCACCGCCTCTGCCT  
CCTCCCCCGGTCTACGAGCTCCACGGCGATGGCGGCGGCGGGCGGCCAGCATCTCTTTC  
CCGCAGGACGGCGGCGGCTACATGGCGCAAACAGTAGGTGGGCCAAGGCCAGAGCTGTTCAA  
CCAAGTGGTGTTCAGTAACCACATGTGCTCTTTCCAGTAG

>JL30\_GRMZM2G140669

ATGGCGTCCTTCGTGCGTGCACCACCACGGTTCCGCCGCTGGACAGGGAGGGCAAGGTCAAGAT  
GTCCGCCCTGGCCCTGAGGAGTAGCCTCAGGCCGTGCGAGGCCGCCGAGGAGGTGGGGGCC  
GGCAGGCGTGGTGCAGAGGCGCGGACATGGGCATCGCCGCCCTTTGCCGATGAGTTCTCCGT

GGAGGACTTGCTGGACCTCGAGGACCTCTGCGAAGTTGACAAGGACTGCGCCGAGCTGGGCG  
ACACGGTGCCGGCGGCGGAGTCTGTGCAGGAAGAGGACAAGGTGTCCAGTGACTCCCACGGG  
TCGTCCGTGCTGTCCTACGAGCTCATGACGCTCCCGTTCCGCACCCGATGATTGACCTCCCG  
TTGCCGGCCCATGACGCCGAGGAGCTGGAGTGGGTGTCCCGTATCATGGACGACTCGCTCGC  
CGAGCTCCCGCCGCCACCGAAGCTACCCGCGGCGCCGTTGGGAGCTGCGCGGCGGCGGCTG  
GAAGGCGCAGTGGCAGGCCCTATGCGGAGCCCGACCACGACCATATGCGCGCTGTGACGGA  
GGCGCTAGTGCCGGTGTATGAGGGCGAAGCGCAGCAAGCGCTCGCGTGGCTCCGTGTGGTGC  
TGTCCGGCGGAGCGCCCTGTGCGAGTCGACATCGTCTTCCACGGCCACCACGTCGTCCT  
GCTCCTCGTCCGCTCTTTCTCGCCGCTGTTACTCCTTCCGGCGGACCCGTCCCTCGTCCTGTC  
CTCGCACCTCCTCGACGAGACGCCGCGGCCAAGAAGAAGTCCAAGCACGGGAAGCATGGCA  
AGAGCGGCAAGCCCAAGAAGCGCGGCCGCAAGCCGAAGCACCCCAAGCCGCCCCAGTTC  
TCGGGCGGCGCCGCCTACGCGCCGGCCAGGGCGACCCGGCGCTGCAGCCATTGCGGCGTGC  
AGAAGACGCCGCAGTGGCGCGCGGGCCCGAGGGCGCCAAGACGCTGTGCAACGCGTGCGG  
GGTCCGTTACAAGTCCGGGCGGCTGCTCCCGGAGTACCGTCCGGCTTGCAGCCCCACCTTCGT  
GAGCAGCATACTCCAACCTCCACCGCAAGGTGCTGGAGATGCGCCGCAAGAAGGATGGCGA  
CCTTGGCCAGCTCCCGCTCCAGTCCCGGCCGCGCTTCTGCTTGGGCCGGCCGTGAGTCGT  
TCTAG

>JL31\_GRMZM2G472945

ATGGCGACCGTCCCAAACCCCAAGACGACCAGGGCCAGGAGGGAGCCGGCGCTGCGTCCCGG  
AAGCAACAACGTGCGGCGGCTCCGGCTCCGGCTCCGGCCGTGGCGAGCGTCAGGCGCGGG  
CCGGCGGCATCCGCCGAGAAGGAGAACCAGCCGCCAAGAGCCTCGGCCACGGGAAGGCGG  
CGGCTGCGGCGACGGCCGCCGAGCCGCCGAAGCCCGCGGAGCCGGCGCCGGTTGTAGCGCC  
ACCTCCGCCCGCGCTGAGGCCGTCGTCGCTGCAGCTCCGCATGAAGGACGAGGCGGCGGCG  
GCGGCGCTGCCCGCTTCGTCGTCGGGCCAGGGGCGAGGAGCTGCTCCCGCCGCGCTCCT  
CCAACACTACGAGGCGTGGGACCTCTCCGACAGCGAGTCCGCGCCGGCCTCCTCCTGGGCCACG  
CTCCCCAACAGGGCGCTGCTGTGCCGGCCTCTGCCTCAGGACGTCCGACGGTGCACGTGCGT  
CATCGCCAGGGAGGCGGCCACCGGCGCCAGAGGGCGTCGCGCTCTACTCCCTCTATACCAATG  
AGGGGCGAGGGCGGCAGGACCGCAAGCTGGCGGTGGCGCGGCACCCGAGGAGGAGGGGCA  
GGTCCGAGTTCGTGTCGTGGCGCAGAACCAGGACGGCATCTTCTGCACCCGCCGACACCAGCTTCC  
TCGGCGCGGTGCGCGCCAACCTGGTCCGATCCAAGTACCGAATCTGGGGCCAGGGTGACGAG  
CTCAAGAACCAGTCAAGCGGCTCCTTGCCGTTGTGCGCTTGGCCCCACCATCACCACGCTC  
ACCGGGAGTTTCAGGAGCTTGAGGGCATGGATCCCCAAGAACCAGTCCATGCAGCTCAAGGCA  
AACAGTTCTGCTCAGATCCAGCATGTCAAGTGGGCTCCCAAAGGATTGGCAGGAGAAGAAGAGC  
AGAGCTGACCAGTTGTGCTCAAGAGCCCCGTTCTACAACCATATGACAAAGCGCTACGAACTGG  
ACTTCAGAGAAAAGGGCAGGAAGGATGGGGTACAAGGTGCAAACATCGGTCAAGAATTTTCAGAT  
GACTTTGGAGGAAAATGGGAGGCAGACGGTGTGTCAGCTTGGTAGGGTTGGCAAATCCAAGTA  
CATAATGGACTTTAGATAACCCGCTGACCCGGCTACCAAGCGTTCTGCATCTGCCTGGCATCGATC  
GACGCGAAGTTGTGCTGCACCCTGTGA

>JL32\_GRMZM2G146688\_CDS

ATGACCAACAACAACAACGGCGCAATGACACGAACGCCGCGGCGAGCGGCTGGCTAGGCTT  
CTCGCTGTCTCCTCACATGGACGAGCACCAGCTCCAGCTCCAGCAGCAGCAGCAGCATGGCCT  
CTTCTTCCCTTCCGTCAGTGCAGGCGCCGCCGCTCGTACGGCCTCGGCGGCGGCTTGGCCA  
CCAGCGCGTCGCCGTAACACGCGCAGCTGGCGTCCATGCCGCTCAAGTCCGACGGCTCC  
CTCTGCATCATGGAGGCGCTCCGGAGGAGCGATCAGCAAGACCACCACGGGCCAAGCTCGA  
GGACTTCCTTGGCGCGGCGGCGGCGCAGTCGAGGCCATGGCGCTGAGCCTGGACAACCCG  
GCGGCCGCTCCAGCTTCTACTACTACTACGGAGGCGGAGGCGGCGGCGGGCCGGGGCA  
CCACCACGGGTCGTTCTGCAGCCGCCGTGCGTGGACCTGTACGGCGGGGCTCGGCCGGGT  
CCCAGCTGGTGGCGGACGACGAGGCCGCCGCGACGGCGACGGCGATGGCGAGCTGGGTGGC  
GGCGCGCGCCGAGAACGGCGCACTGCTGGCCGCCGCGGGCAGCCGCACCAGCACGCGCTG  
GCCCTGTCCATCAGCTCCGGGTGTCGCGCTCGAGCTGCGTGACGGCGCACCCAGCTCCGA  
GTACGGCGCGGCGGCGGCGGCGTGCATGGACGGCGGGCGCAAGCGCGGCGGCGGCGGG  
GCAGAAGCAGCCCGTGCACCACCGCAAGTCCATCGACACGTTCCGGGCGAGGACGTGCGAGT  
ACCGCGGCGTGACGAGGCATAGGTGGACGGGGAGGTATGAGGCGCACCTGTGGGACAACAGC  
TGCAAGAAGGAAGGCCAGAGCAGGAAGGGCCGGCAAGTTTATCTCGGCGGGTACGACATGGA  
GGAGAAGGCGGCGAGGGCCTACGACCTGGCGGCGCTCAAGTACTGGGGCCCTTCCACGCACA

TCAACTTCCCGCTGGAGGACTACCAGGAGGAGCTGGAGGAGATGAAGAACATGACACGGCAGG  
AGTACGTGGCGCACCTCAGGAGGTACGTACGTACGTTCGTTTCACTTCACCAAATGA

>JL32\_GRMZM2G146688\_GENOMIC

ATGACCAACAACAACAACGGCGGCAATGACACGAACGCCGCGGCGAGCGGCTGGCTAGGCTT  
CTCGCTGTCTCCTCACATGGACGAGCACCAGCTCCAGCTCCAGCAGCAGCAGCAGCATGGCCT  
CTTCTTCCCTTCCGTCCTGCGGGCGCCGCCGCTCGTACGGCCTCGGCGGCGGCTTGGCCA  
CCAGCGCGTCCCGTACTACACGCCGCAGCTGGCGTCCATGCCGCTCAAGTCCGACGGCTCC  
CTCTGCATCATGGAGGCGCTCCGGAGGAGCGATCAGCAAGACCACCACGGTACGTACGTACGT  
GCGCCACATCCATACTGAGCCGATGGCCTCGCGTCGACCGGCCCGCTGGTTCGTTGTTGTTGAT  
CGATCGGCGTCATTGTTGGTTCCTCAGGGCCCAAGCTCGAGGACTTCCTTGGCGCGGCGGCG  
GCGCAGTCGCAGGCCATGGCGCTGAGCCTGGACAACCCGGCGGCGCCGCTCCAGTTTCTACTA  
CTACTACTACGGAGGCGGAGGCGGCGGCGGGCCGGGGCACCACCACGGGTTCGTTTCTGACG  
CCGCCGTGCGTGGACCTGTACGGCGGGGCTCGGCCGGGTCCCAGCTGGTGGCGGACGACG  
AGGCCGCGCGACGGCGACGGCGATGGCGAGCTGGGTGGCGGCGCGCGCCGAGAACGGCG  
CACTGCTGGCCGCCGCGGGCAGCCGCACCAGCACGCGCTGGCCCTGTCCATCAGCTCCGGG  
TCGTCGCCGTCGAGCTGCGTGACGGCGCACCCAGCTCCGAGTACGGCGCGGCGGCGGCGG  
CGTCGATGGACGGCGGGCGCAAGCGCGGCGGCGCGGCGGGGCAGAAGCAGCCCGTGCACCA  
CCGCAAGTCCATCGACACGTTCCGGCAGAGGACGTTCGAGTACCAGCGGCGTGCAGAGGTACG  
TACGTACACGCCCGCGTGTGAGCTAGTTGACTGGTCCGTCGCCCGTCCGTCATGGAGCTG  
AAGCTGAAGTTGAACTAAACTAAACTGAAAGTAATTAAGCAGGCATAGGTGGACGGGGAGG  
TATGAGGCGCACCTGTGGGACAACAGCTGCAAGAAGGAAGGCCAGAGCAGGAAGGGCCGGCA  
AGGTAACAACAATTGATGAAATTCAGCAAATTTATCTATCTATCTATCTAAATCTAAATGG  
GTGTTTTTTTTGGCTGTGGGGACGATGGCGGACTGCCTGTCTGTCTGTCACGCTGCAGTTTATCT  
CGGTAAGCACTCTTTGCTGCACATAAGCACATTGATGGTGAATAAAGTAAAAAAACTGCGAG  
CTGAGCTGACTGCTGAGAGCGTGGTTCGGTATTGTATATTTTTAGGCGGGTACGACATGGAGGA  
GAAGGCGGCGAGGGCCTACGACCTGGCGGCGCTCAAGTACTGGGGCCCTTCCACGCACATCA  
ACTTCCCGGTAATAATTTTTTTTTGCTTTTGTTTTACCGTGGTGCATCATGGTAAAAATCCTACC  
ATTGCTGCGCTGATACTGTGCTGCGTGTGTGCCTGCAACCTGAATGAAGCTGGAGGACTACCA  
GGAGGAGCTGGAGGAGATGAAGAACATGACACGGCAGGAGTACGTGGCGCACCTCAGGAGGT  
ACGTACGTACGTTCGTTTCACTTCACCAAATGA

>JL33\_GRMZM2G111045\_CDS

ATGGGAAGGGCACCTGCTGCGACAAGAACAAGGGCCTCAAGAAGGGGCCCTGGACGCCGGA  
GGAGGACAAGCTCCTCGTCGACTACATCCAGACCAACGGCCATGGCAGCTGGCGCCTGCTCCC  
CAAGCTCGCAGGGCTGAACCGGTGCGGCAAGAGCTGCCGACTGCGGTGGACCAACTACCTCC  
GGCCGGACATCAAGCGCGGGCCCTTACAGCCGAGGAGGAGAAGTCCATCGTCCAGCTCCAC  
GCCATCGTCGGCAACAAGTGGTCCATGATCGCGGCGCAGCTCCCAGGCCGGACGGACAACGA  
GATCAAGAATACTGGAACACGCACCTCAAGAAGCAGCTGCGCCGGATGGGCCTCGACGAGCC  
CCCGCCCGGCCGGCCGCGGCTGCCCGCCGCGCGCCACATGGCGCAGTGGGAGACGGCC  
AGGCTCGAGGCCGAGGCGCGCCTCTCCCTCCTCGCCGCCACCGCCGCTCCTCCGGCACCCAC  
CGCGACCACCACAGCCACCACCACCGTCTGCAGCCTCCTCGTCCCTCCACCACCGTCCGCTGG  
CGCGGCCGACAACAAGGCCTCCAACCCCGCGGACATCTTCTGCGCCTGTGGAGCTCGGACAT  
CGGGGACTCCTTCCGCGCAAGACGGACACGACGCCAGCGGTGCCCGCGCTTCCGGCGCCC  
GTCGTCAAGAGGAAGGACACGGCGATCAAGCAGGAGCCGCGGGCGCTGCTGCTCGGCCTCAG  
GGACGACTCCTCGGCGGCGTCCAACGACAACGAGACGGAGGTGGCGGAGGCGCTGGAGGCG  
AAGTACCAGATGTTCTCGACTTCGCGGGCGAAGAGCTGGGATTGTTCCATGGCCGGCACGGC  
GGCTTCTCGCTGTTCCCGCCGCTCGACGTGCTGCTGAGGCGTCCCTGGACTCGGCTTTCAAG  
TGA

>JL33\_GRMZM2G111045\_CDS

ATGGGAAGGGCACCTGCTGCGACAAGAACAAGGGCCTCAAGAAGGGGCCCTGGACGCCGGA  
GGAGGACAAGCTCCTCGTCGACTACATCCAGACCAACGGCCATGGCAGCTGGCGCCTGCTCCC  
CAAGCTCGCAGGTCAGAATTCCTCTCTTTATTAGTCCCTTCTCTTCCGCGGTTTCCACCGTCCGTCG  
TCTTAGCTTAGTTCTGCCCGACCATTGGTGTGCGACTCGCACTGGCCTAAAATGCCGACCAAT  
TCCTCGCCGGAGTGAACGATGCTTACTCTATTTCTGGGATGGCAATGGCATGCAGGGCTGAACC  
GGTGCGGCAAGAGCTGCCGACTGCGGTGGACCAACTACCTCCGGCCGGACATCAAGCGCGGG  
CCCTTACAGCCGAGGAGGAGAAGTCCATCGTCCAGCTCCACGCCATCGTCGGCAACAAGTAA

GAAAACTTTTTGGCCGAGCCGAGGTAGCAACTGCCTGCCCGTCCCATTTCGATCTGTGGCACCG  
GCAGAGAGCAGCACGTTTTCTCTCTCGTCATGCTCTCATCTCACTCACTCATCATAGCTTAGAGA  
GCTCGCACTGCCGGTGTACTGCTCGGCGCAGCGCCTCACTGTGCGCAAAGCATCGCGTCGCATT  
GAATGATGCCACCTCCGTCCAAGGCATCGCGTCCAAAACCTGGCGCCTTCAGCATGCCGGATG  
TGTATTGCTATTGCCTCGCTCTCGTAGACGTAGTACTCCTATTTACTAGAGCCCTGTCTGCTCAT  
ATTTCTGCCACGGCAATTGGTGATTGGCTGATTGCTATTGGCAGGACAACCTCTCTCCCTCTCCG  
GAAAAAAAGTTTGCAAACCTATTCTCGCTGCTTGAAGAGTCAAACGGTCTAAACTTCAACTAAATTT  
ATATAAAAAAATACAAACATTTTCAGTACAAAAAGAAGTGTCAATTAATTAGGTATACACACGCTG  
GTGCTAATACTATAAACTTGGACAGTTTGATTGTCATAAATAATATTGTTGCATTCTCTCGAGAA  
CGAACGGCATAACGTTGACGGTTTTTTTTATCTGGTGTGATCCTGGTACCTCAAGGTGGTCCATG  
ATCGCGGCGCAGCTCCCAGGCCGGACGGACAACGAGATCAAGAACTACTGGAACACGCACCTC  
AAGAAGCAGCTGCGCCGGATGGGCCTCGACGAGCCCCGCCCCGGCCGGCCGGCCGGCTGCC  
CCGCCGCGCGCCACATGGCGCAGTGGGAGACGGCCAGGCTCGAGGCCGAGGCCGCGCCTCTC  
CCTCCTCGCCGCCACCGCCGCCTCCTCCGGCACCACCGCGACCACCACAGCCACCACCACCA  
CGTCTGCAGCCTCCTCGTCTCCACCACCGTCTGCTGGCGCGGCCGACAACAAGGCCTCCAACC  
CCGCGGACATCTTCTGCGCCTGTGGAGCTCGGACATCGGGGACTCCTTCCGCCGCAAGACG  
GACACGACGCCAGCGGTGCCCGCGCTTCCGGCGCCCGTCTCAAGAGGAAGGACACGGCGAT  
CAAGCAGGAGCCGCGGGCGCTGCTGCTCGGCCTCAGGGACGACTCCTCGGCGGCGTCCAACG  
ACAACGAGACGGAGGTGGCGGAGGCGCTGGAGGCGAAGTACCAGATGTTCTCGACTTCGCG  
GGCGAAGAGCTGGGATTGTTCCATGGCCGGCACGGCGGCTTCTCGCTGTTCCCGCCGCTCGA  
CGTGCTCGCTGAGGCGTCCCTGGACTCGGCTTTCAAGTGA

>JL34\_GRMZM2G377217

ATGGAGGGAGGCCAGCTGGGGACTTGCCTTCCTAGCTTCCTCGTGCCGGATCACTACGCCTTC  
CCTCTTCCGCTCCCGCCGCTACAACCTCCTAGTAGCCAACCGAACAACAAGCCTTTCCAGATGC  
CGTTTGACGACGTCCAGGAAGAGGCCGGGAACACGCCGGGATGCTCTCCTCCTCCGACCACT  
GTGGACTATACCCGCTGCAGTCACTGCCCTTCGGCAGTAGCGCCTCCGGCGGCGCCGGCGCG  
GCAGCGTGCGGTGGGAAGCCTACGGCCGTCGGTTTTATGCCAGCTGTAGTGCTGTCGGCGC  
TGAGGAGGTCTGCACCTCGGTGGCGCTACTACTAATGGTTGCAACGAGAGTAATAGCGCATG  
GTGGAAGGCCTCAGCAGCGGAGAGAGGGAAGATGAAGGTGAGGAGGAAGATGAGGGAACCGA  
GGTTTTGCTTCCAGACCAGAAGCGACGTGGATGTACTGGATGATGGCTACAAGTGGAGGAAGT  
ACGGCCAGAAGGTTGTCAAGAACAGCCTCCATCCAAGGAGCTATTTCCGGTGCCTCACAGCAA  
CTGCCGCGTGAAGAAACGGGTGGAGCGGCTGTGACGGACTGCCGCATGGTGTGACCACGT  
ACGAGGGCCGCCACACGCACTCTCCCTGCAGCGACGACGCTTCTCCGGCGACCACACCGATT  
GCTTCAGCTCCTTCTGA

>JL35\_GRMZM2G023051

ATGGAGGAGGACCCGCTCATCCCGCTGGTGCACGTCTGGAACAACGCCGCCTTCGACCATGCC  
TCCGCTCCGCTCCGCGTGGCACGCCATTCCCTGCGCCCGCGAGCGCCCGCGAGGGGG  
ACAAGGAGAACCACCGCCCCGAGCCCGACGTTGAGGCGGAGGTGACGACGTTGAGGCCGAG  
ATTTACCACATCGAGGCGGAGATCCTGCGCCTGTCTTCCCGCCTCCACCACCTCCGCACCTCCA  
AGCAGACGGAGCCGCCAAGCGTGGACAGGTGCGCGGACGCGGATGCGGGGGCTCAGTCT  
GGGCCAGCTCGACGTGCGCGCTGCCGTGACTCCGACCCGCTCACCGACAAGCAGCAGCCGA  
GCGCCGCGCAGGGCTTGA AAAAGCCTATCAAGCAGGCCCGGCGGCGCCGCGAGGCCGGAG  
CTCCAGCCTCGGGCCCTCGAGATCGTCCGACGAACCCTAGGGTCTCCTCGCTCCTCCGCCG  
CCGCCGCTGCCGCACCGAAGAGGAAGATTAGGGCGAGGGCGGCGCCGCGCGGCCGATCCT  
CAGGCCGATCAAGGAGCCTCCCGTGCAGCGGCGCCGGGGCGTCAAGCCTCGGGCCCTTGGAG  
ATCCACCACGGCGTCCGACGCAAGCCCGGGCGGCGGCGGGTCAAGCACTTCTCCAACAA  
CAGGCTCGGTGCCGTTTCGAGAGGAGGAAGGCCAGCGTTCCAAGGAGCACGCCGTCCCCGCCA  
GACCGTGGCCATCCAGCAATGCCAGGCACCCACTGGATGCCAGGCAAGGCACCGCAGCAAGC  
AGAGCCAAGGCGAGGAGCGGGAGCATAAGCCCCAGCAGGTTCAAGGAGGAGTCCACTTCCAA  
GGCTGCCGAGACAAGAGCGGGAAATGCCAAGCCTACAGAGGCGACGAGGGGAGGGAGCGAA  
GCGGTCAATCACACCAGCAATGTAGCCACGACGAAGAGGCCGCGGGGAGCTCCAAGGTGAG  
GGTTGTCCCGAGCCGCTACAGCATCCACCTGGCTCCTCCCTAGCAGCTGTGACACAAGGCAA  
CCGATGCAAGCAGTCTCTCCAGGATCGGCTACTGAGACCAGAGTAAATCTCACTGAGCCGCC  
GAACGACGAGTTGTCTCCTGAAGAACTTGCCAAGGTTGCAGAGCTGCTCCAAGGATTAGGAC  
CATGCCGCCTTCTGATGAGAGCCCGCGTGACTCGGGATGTGCCAAGCGTGTGCTGATTTGGT

CGGGAAGCGATCCTTCTTCACTGCTGCAGGGGACGATGGCAATCTCGTTACGCCCTACCAGGC  
ACGGGTGGTTGAACTTGAATCACCCGAGGCAGCAGCAGAAGAAGCAGAAGCTTGA

>JL36\_GRMZM2G109480

ATGGAGGCGGCAGTCGCGGAGACGCAGGGGATGTCGCCGTACGAGGCGGCGCGGGAGCGGA  
ACCTGCAGGAGAACAAGCGAAAGATGGAAGCCCTCAACCTGCGCCACCTCTCCGCCGTATCA  
AGGAGGCCCCCAAGACCCCTTCCCCCATGAAACCGAAGAGGCGCAGGATCATCGAGGACGCG  
GTCGTGGTTCCCTCGCTCCAGGAGGTCCCGCCGGCTTGCCAATGTCCCTGAGGTCAAGTAC  
GCAGAGATAGCACCCACACCGTGCAGATAGAATGACAAGGTCTCCTAGAAGACCAGCTGACCTC  
ATCTACTTGGCAAGACGCGGATCAATTTCCATGAAAGCTAGGCTGGAGGCAACAAGGAAGGCT  
GAGGAGCTAGAATCACAACCTCGATCCTGAAATCCCATCCTTTCGTGAAGGCGATGTTGCATTCCG  
ATGTGGTTCGAGGCTTTTGGCTGGGTCTCCCGAGCCATTTCTGTGACACTTACATGCCGAAGCA  
AGACGCCACTATCACCTTGGTGGATGAGAAGGATGAAGAATTGACACCAACTACCTTGCCTAC  
AAGAAGGGGCTAAGTGGCGGGTGGGCTGGTTTTGCGCTATACCATGCGATTGAGGATGGAGAT  
TCAACTGTTTTTTCAGTTGATTAAGCCCACGACCTTCAAGGTGCATATCGTCCGAGCAGCTACTGA  
TGATAGCAGTGAAGTAGATGAGTGA

>JL38\_GRMZM2G074032

ATGGCACTACTGGTCAAGAGCCACCAGCAAATGTTGGTCTCCTCCTCCACCACCTCCTCGTCGT  
CCCCTTCGTGGCGTCCCAGCAGCGGCACCCGCGCCACCTCCTCCTCCTCCTCCTGCC  
TCACCGACCAGCAACAGCCGTCCCAGCCAAGCGCAAGAGGCGCCCTCCCGGCACGCCGGAC  
CCCGATGCGGAGGTGGTGGCGCTGTGCGCGCGGACGCTGCTGGAGTCGGACCGGTACGTGTG  
CGAGATCTGCGGGCAGGGGTTCCAGCGCGAGCAGAACCTGCAGATGCACCGGCGGGCGGCACA  
AGGTGCCGTGGCGGCTCGTGAAGCGGGCGCCGCCGCTGCTGGCGGGCGGCGAGGACAGCGC  
CGGCGCTAATAATAGTAGCACAGCTGGTACAGGCGTTGGCGGGCGGCGGCGGCGGCCCCCGGA  
AGCGCGTGTTCGTGTGCCCCGAGCCGAGCTGCCTCCACCACGACCCCGCCACGCGCTGGGC  
GACCTGGTGGGCATCAAGAAGCACTTCCGGCGCAAGCACGGCGGGCGGCGGCGGCGAGTGGGTGTG  
CGCCCGCTGCGCCAAGGGCTACGCCGTGCAGTCCGACTACAAGGCGCACCTCAAGACCTGCG  
GCACCCGCGGCCACTCCTGCGACTGCGGCCGCGTCTTCTCACGGGTGGAGAGCTTTATCGAG  
CACCAGGACGCGTGCAACTCCAGCCGATACGCGGCGAGGCCGTGGCGGTAGCCGTGCCGG  
CGCCGCGCTCGGCGCTCCCGGTATCCGCCCGCCGTCCCGCGGCACCAGCCACGGTGGC  
ACCGGCACCGCCGCCACCGGAGCTCCAGCTCCTCCCCGCTCCGCGGCGGCATCAGCGCCGC  
TGGCTAGCACACCGACCGCCTCTGTCCACCACCACAAACGCGTCACAGGAGCAAGAACCCC  
ACGCGGGCGGCGGCGGCGACGACGACGAAGCTGCAGCTCTCCATCGGCCCCACCGTCATC  
GCGCCGGGCGCCGACGCTGCTGCGGCGACCGCCTCCGCGTGGCGAGGAGGACGACTCCG  
AGGCGAAGGAGCTGCGGCGCGCGATGAAGGAGAAGGCCGCGAGCGGACGCGGCGCGGGCGC  
GGGCGCGCGGGGAGGCCGCGCGGCGGAGCGCGCGCTGGACGAGGCCCGCCGCGCCAGGC  
AGCGCGCCCGGGCCGACCTCGAGAAGGCGTGCGCGCTGCGGGACCACGCCGCGCGCCTGCT  
CGCGCAGGTACCTGCCACGCGTGCCGCCAGCGCTCGCTCGCCGTGGCCGCGGCGCCCGCG  
GTGGCCTGCGACTCCATTATCAGGGGAGGAGGAGGAGAAGCAGGCATCTAG

>JL39\_GRMZM2G027068

ATGTTCCCGGTGGAAGTGTGCGCGCTCGCGGCGGGCGGTGCGGGAGCGGGGCGTCAGGCTG  
CCGGCGACGCCCGGGACGATGCTGCCGCCCTTTTTTCATGGGCTCCATCTGGCCCGCGACC  
GCTGGCGCCGCTGGCTCCGAGGAGGACGAGGCGGCGGCCGCCGCCGCCACGACCGC  
GCGCTCGCCGCGTCGCGCAACCACCGCGAGGCCGAGAAGCGCCGTGCGGAGCGCATCAAGTC  
GCACCTCGACCGCCTCCGCAACGTCTCGCCTGCGACCCCAAGATAGACAAGGCTTCGCTGCT  
GGCGAAGGCGGTGGAGAGGGTGCGGGACCTGAAGCAGCGGGCGGCGGGCGTCCGGGAGGC  
AGCGCCGGCGCACCTGTTCCCGACGGAGCACGACGAGATCGTTGTGCTCGCGTCCGGGACGCG  
GCGCCGTCTTCGAGGCCCTCCGTCTGCTGCGACGACCGCTCCGACCTCCTCCCGGACCTCATCG  
AGACGCTGCGCGCGCTCCGCCTCCGCACGCTCCGCTCCGAGATGGCCACCCTCGGCGGGCGC  
GTCCGCAACGTGCTCGTCCCTGGCGCGCGACGTGCTCGACGGCGGCGGCGGTGCCGTCCGG  
GAGGTGATGACGGATACGGTGGACGCGCTGCTGACTCGGCGGGCGGCGCCACGGACGGCGG  
CGGCGGCGACTTCTCAAGGAAGCCCTGCGGGCTCTGGTAGAGAGGCCAGGCGCCGCCGCGGA  
GACCGGCCCAAGAGGCGACGGGTCTCGGACATGAACATGCAAGCGGCAGCATAG

>JL40\_GRMZM2G140694



ATGATGGCCGGGGCACC GCCGATGCACATCTGCCTGGACTCGGACTGGCTCAAGGGCATCGTT  
CCCGAGGAGCCTGGGATGGGATCGTCGTACCGTCAGCGGAGCTGATCGCGTGCCCTAGGCC  
AATGCACGCCACGGCTGCCGCGGGCGGACCGGCGTCTGCGCCCCGAGCAGACCAGCCACTCA  
AGTGCCCCGCGATGCGAGTCCACGCACACCAAGTTCTGCTACTACAACA ACTACAGTCTCTCCCA  
GCCGCGCTACTTCTGCAAGACGTGCCGCCGCTACTGGACCAAAGGCGGATCGCTCCGCAACGT  
CCCGGTTGGTGGGGGATGCCGCAAGAACAAGCGCGCCAGCGCCAAGAAACCACCCGCGCCAC  
CGATGCAGCCGCCGCACATGTCGGAGACGGGCTCCACCTGTCTTCTCCGGCGTGCAGCAG  
CTGCCGCCGGCCGATCCGCTTTGCAGCCTCGGCCTTTTGGACTGGAAGTATGACCCGATCCTC  
ACAGGTTCCGGTGGCGTGCCTGGCTCGTTGGATGGCGCCAGCTCCGAGACGCACTTCGCAGG  
GACGGGCATGCTGGGCATCCAGGTGGCAGCGGGGGCGGCGAGTGCCACGCGCTGAGCGCG  
CTCCGGTACGCGGCCGGCCTGGGCGAGAACCTGCAGGTGCAGGGTCTCCCGTTTGGGGCGCG  
CGCTGAGCACGACGCGATGGAGATGAAGCCTGCGGCGACGGACAGGCTGCTCTCGCTGGACT  
GGTACAGCGAGACAAGCCGCGCGCCAGAGAGCGCCATCAGCTCGTTGGGCGCGCTGGGCCTG  
TGGAGCGGCATGCTCGGCGGTGCGCACCAGCACCATGGCTCGTCGGCGGCCATCTAA

>JL43\_GRMZM2G098988

ATGCAGGGAGACCCCGGTTACGGGTACGGTGGCTACGGCGCCGGCGCCGGCGGCTACGGCT  
ACGACTACGACGTCGCCGCAACTGCGCCGGAGGCGGCTACTACTCGGCGGCGAACGACCGG  
TACCCTGCCGCGCCTCCGCCTGCTGCAGCCTATGAGGATCCGCTCGGTGGTCGGAGGCAGCA  
CGACTTCCCGGCGCCGCTCACGGGGCTGGAGTTCCAGCCGTCGGACACCTGTCCCAAGAACTA  
CGTCATCTTCGACCAGACGTACGACCGGAGCCGGGTGATGTTCCACCCCTCCCTGGCCAACAA  
CTTCGGTTCCTCTGCCGGCGGATACGACTACGGCAACCACTGCTACGGCTACGACCAGACCTA  
CCCCGGCGAGAGCGCCTACCACGGCTGCGGCGACGACGCCGGCGCCGGCGCCGGCGGCGCTC  
TCGGTCCGGCAGAAGGAGGACACCGACGAGATCGACGCGCTCATGAGCACGGAGGAAGGCCA  
CGAAGAGGACGACGTGCTCAGCACCGGCCGACACCCGGATGCCGCGCCGGCGGCTCCCCG  
GATTCCACGTGCTCATCCGGCGGGTACGCTGGGAACAGCAGCGGCGCCGGAAGCACGAGAC  
GGGCGGCGGTGAGAAGAAGAAGGAGCGGATGAAGAAGATGGTGCGGACGCTCAAGGGGATCA  
TCCCCGGTGGCGACCGGATGGACACGCCGGCCGTGCTCGACGAGGCCGTGAGGTACCTCAAG  
TCGCTCAAGGTGGAGGTCAAGAAGGCCGGCGCGCGTGGGTCAAGCAGCTAG

>JL44\_GRMZM2G123900

ATGTTCTTGAATATACCGTGCTTTGAATTCCAGCCTTTATTAATTGATTTCGTTATACATACAGATG  
CAGATGCAGATGCAGCAGCAGTCACCGCTCCAGTGTCTCCTCGGCAGCGGCGGTGGCAGCGA  
CCACCACCACCTCATGCCTCCTCCGTCCGGCCTGGCGCCGCTGCCGGGGGGTCTGCTGACA  
CAGCGGCGAGCGGTCCGGCGGGAGGCGGCTCGTCCACCTCGGCCTCAGTGCAAGCCGCGGC  
GGGAGCGGGGGCAGGGGGCGCAGCCTCGCCCCGTGGTGTGATGGCGGAGCGCGCCCGGCTC  
GCGCGCGTGCCGCTGCCGGAGCCCGGCACGCTCCGATGCCCGCGCTGTGACTCGACCAACAC  
CAAGTTCTGCTACTTCAATAACTACTCGCTGTGCGAGCCGCGCCACTTCTGCAAGGCGTGCCGC  
CGTACTGGACCCGTGGCGGCGCGCTCCGCAACGTGCCCGTCCGGCGGCGGGTGCAGGCGCA  
ACACCAAGCGCTCCAGCAAGAAGTCGTCCCGCGGGCGGCGGCGGGCGCCACGGCGGCAAC  
CTCCTCGTCTCGACCACCTCCACCTCCACCACGGCCACTACCACCACCACCACGAGCGCGGC  
CATGGCGGCGGCGGAGGCCATCGCCGGCATGCAGGCGCAGCTGCCCCACCTCGGCCTCCCG  
CCCGCAGCGGCCCGCGCGGCGCTTGAGGCCTCGCTGGAGGGCTACCACC ACTACCTCCCGCT  
CCAGATGCAGCCGCA GTTCTG CAGCAGGCTGGCCTGCACGGCTACCATTTCCCGACGACG  
GCACCGCGTCTCGCAGCTGACGGGTTCCCGAGGGGCGTCTCGCCTCGGGGCTGCTCGC  
GCAGCTCGCGGCGGTGAAGATGGAGGAGCACGGCAGCAACGGCGGAGGTGCCATCGCGGCG  
CATCATGAGCAGCAGTCTACTGGCCCGG CAGCACCGGCGGTGGCGGTGGGTGGCCGGTGGGA  
GTTCTTGTGCGGGTTCAGCTCATCTCGTCCGGGAATGTGTTGTGA

>JL45\_GRMZM2G374986

ATGGTGAGGACGACGGTGGTCCGGCAGGGAGAGGAGCGGCGGCGTGGAGGCAGTACAACAGGT  
CCAAGGTGCCTCGCTCAGGTGGACGCCCGATCTGCACCACTGCTTTCGTCCACGCCATCCACA  
AGCTCGGAGGCCCGGACAGGGCTACGCCGAAGCGAGTGCTGCAGCTGATGGGGGTGGGAGG  
ACTCACCATATCTCATGTCAAAGCCATCTGCAGATGTACAGGAACATGAGAAATGATCTTGGAA  
TGCAAGGGACGGAGGATCAGGAGCACGTATACGTAGGTGGAGGAGGCATGCATACCAATATAC  
AGCAGCAGCGGGACCATGGGTGTGGCGATGCCCCCTGCTGCATCTGCTGCCGCCACTCGCCA  
AATAAGCCTGCAAAGGAGGAGGAGGAGGCGACGCTGTTCCAACGCCAACTGAAAAGGTGAGG  
ACGGAGACGAGGCGTGGGCGTGGCCAGCGGGAGGAGATCGATGATGGGAGCGCGAGCCCCA

AGAGGCGGCTGCTGCTGCTGCTGCGAGGAGGGCGAGGCCGCCAGGAATATGTGAGAGCGACGG  
CTCAGGCTCACCCAGCAGCGGCACGCTCGCAAGTGGCTACGACAACCTACATGCGCATGATGCA  
AGCGGCCATGGGCGTGGCTGCCGCTGCCGGCGCTGCTGCTGCTGCTGCTCCTCATCATCATCA  
TCATCATCACGCGGAGACGGTGGAGCCCCGGTCGAGGGCCGAGAATAAAGCAGCACTTGGCGC  
GGCCCCGGCGCAGACGGCGGCGAACACGCTCCTCCCAGCAGCAGGCAGCTCTTCACGTTCTTG  
GGCTTCGTGGTGGCGCCGGGCGCCGCTCCTCCCTGCTGCAGCCGTGACCACCCTTTCGA  
GATGGTCGGCACGGCTCTCACCCACCGCAGCCTCCAGACACCGCCCACCAAGGCCGCGGTGG  
CCCAACAAGTCGGTGGCGATCCCTGCTGGTCGTCGGCGGCCGCTTCCGAACACGACGACCAC  
CACCACGACCGCGACCGCGACGGCTGCTGGCTCTCGCTGTCCCTTGCGCTGGAGACGAGAAG  
CAGCCGACGCGCCGACGAGGGCGGCCGGCTCTCGCCGACGGGGAGCCGGATCAGCCTCGAC  
CTATCCTTGTCCACGATATAG

>JL46\_GRMZM2G011463

ATGGCGAAGGGCGGGCTGAGCAAGCTTAAGTGCATGATCAAGAGGTGGCACTCCTCGAGCCG  
GATCTCGCGCACGCCGTGAGGGTGTGTCGGCGCGCTCTCACGACGTGCGCGACGCTGGCGCCG  
GGTTCGCTCTGGAGAACTCGTGGAGGAAGGGCGCCGCTGCCTCGTCCGTCTTTCGCTTCGGCG  
GCGGTGGCACGGGGTGGCATCGTTCCACGGCACCGACGGCCTGCCCGGGGCCTCCACCC  
GGTCTACGTGCGCAAGTCGCGCCGCGCTACCTCATCGCCGCGGACCTCGTCGGCCACCCCC  
TGTTCCAGAACCTCGTCGACCGCTCTGGCGGCGCCGGCGTAGGGCGCCGGCGGGACCGTCGTC  
GGCTGCGAGGTCGTGCTGTTGAGCACCTCCTCTGGATGCTCGAGAACGCCGACCCGCGAGCC  
GGAGTCGCTTGCCGAGCTCGTCGAGTATTACGCGTGCTGA

>JL47\_GRMZM2G097275

ATGGGCTCCTTTGGGATGGACTGGAACCAGAAGGCCTCCGTGTTGTGGGACTGGGAGAACTTG  
CCGCCCGTAGCCGTAGGCGCGAGCGGGAGCGAGAACCCCAAGGATGGCTGCTGCGCCTCAGG  
CTTTGCATTCTGCCTGTGGCACCATTCTTCCAGCTCAGAGATGGGGTATGGCTCATCCAAGAG  
CTCCGTATCCGCGTGGGCTGATGATTCTTACCCCAAGGCCAAGGGGAAAAGCATGGAGCTCAA  
CTTCGCACCTGACAAAGTGCCTGACAAGAACTGATTGAGGGAAAGTTGACGACGCCAGGAC  
CTCTCCGTGTCGCGGGTATTGCCATCAGCAGTGCAGAGCCCGTGCTTAGCCTGAAGCTTGG  
CAAGAGAACGTATTTTCGAAGATGTCTGTGGAGGGCAGAGCGTCAAGAGTTTGCCGTCGGATAC  
GAGTGCAGTACTCCTCCTGCTTCTCCGAAGAAGACGAAGGTGACTCAAACAAGAAATCT  
TACTGTCAGGTTGAAGGCTGCAAGGTTGATCTCTCTTCTGCTAAAGAGTACCATCGGAAGCACA  
GAGTCTGTGAACCTCATTCTAAGGCTCCCAAGGTGGTTGTTGCTGGTCTGGAGCGGCGCTTTTG  
TCAACAGTGTAGCCGGTTCCATGGATTAGCTGAGTTTGACCAGAAGAAGAAAAGCTGCCCGCAGG  
CGCCTCAATGATCACAATGCCCGCAGACGGAAACCACAACCTGAAGCACTTTCTTTTGGGTCA  
CAAGGCTGTGCGCAATGTTCTATGACACAAGACAACACACAAGCCTTCTGTTTGGTCAAGGTCC  
TTATGGTCAAATGAGAAGTTGTGCAAGTTCTTTCATGGGATAACCCTGGAGGTGGCTTCAAATTTG  
CAGAGACAAAAGGTCCCTGGTTAAGAGCTGGTGGTGGTGGATGGGTTCATCAACCAAGTCAGCA  
GGTGTGGAACAACCTTATGCCACATGGTGTCCATCAAGATTTTGGTGGTTCACAGCTTTCAAAG  
GAACCAATGCAAAGGTCCTTCATCAAGGCGTTGAAGCTTCTGCGGTGCGCTCCAACCAGAACG  
GCGCCCCACAACCGGACCTTCATCGTGTCTCTCTTCTGTC AACAGCTGGGCTGGTGGTGGT  
GTACCGGTACCGGTACCGACCAGCACCCGACGGCCAGCTGCGCCACGCTGCCCTGAGCAGC  
AGCCTCGCCGCCAGCTCCGTCTCCGTGGCGCAGGCCTCGCCAGCAGGGCTGTGGCAGGACGG  
CGGCGCGGCCCTGGGCCACCACGACTACGCCACGCGTTCCAGGCTATCAACACGCCGGGCG  
GCGGGCGGCGCCGCGCTCCCATTCAGTGGGTGAGGAGCTGCTTCAGCTCCCGCGTCCGCGG  
TCCCTGTACGACGACGGCTCCTCGTCCCGCTACGACCTGATGCGCTGA

>JL48\_GRMZM2G148467

ATGGGGTGCCACGCCACGCCAGCGTGGGTAGCATACCGGCTGTA CTTCCAGCAGCAGCATCAT  
CAGCCGCCGCCGCCGCCGCCGCCGCTTCCACTTTGCTTTGAGCCCTGCCCTCAACGACGACTCG  
CGGGCCGGCAGCACAGCACGTATAGCTATGGAAGGAAACGGTGGCGCGGGCGGCCGGTAGCG  
GAAGCGCGGCACCGCCCTGGGATCTCGCCATGCACTGGGCACCCGCCGTAGTGTGCTCCTAC  
CCGCCGCAGCCCTTGGAGCTGCAGCAGCAGGAGCTTACCTGCCTCAAGCTGGGGAAGCGGCC  
CGCCTGCTGCTGGGCAGGGGGCGCCGGGCAACCAAGCGGCGCAGGTCCACGGCAATGGCGGC  
GCTGGTGGCGCAGCTGCTGAGGGTAAGAGGAAGGACAAGGCGCCTGCCGCGGCGGCCGTGA  
CGAGGTGCCAGGTGGAGGGGTGCCACCTGTGCTGGCGGACGCCAAGGAGTACCACCGGCG  
GCACAAGGTGTGCGAGGGCGCACTCCAAGGCGCCCCGGGTGCTGCTCCTCGGCGCCGAGCAGC  
GCTTCTGCCAGCAGTGCAGCCGGTTCACGCGATCTCGGAGTTCGACGACGCGAAGCGGAGC

TGCCGACGGCGTCTGGCCGGGCACAACGAGCGGGCGGCGGAAGAGCAACGCCAGCGAGGCCA  
TGGCAAGAGGGCGTTCGCGCACCCACACGGAGTGACGGCTTTCGGCCACGGCGGCTTCCCTGCC  
TCGCGCGGCCTCGTCCCCGCAGGGTTCGTCGCCGGCGGGCTGGTGTCTCTCTCTTCTGTG  
ATCGGCCAGAGGCAGCGTGGCGGGCGCCAGCGGGCCCTGGCTGGTACGGCGGGCGCGGGAG  
GACATCCCGGGCGCGCTCCAGCGCGGCGCTCGACGACCTTATCGCCGAGAACCAGCGCCGCCG  
GCTCCTCGCGCGGCAGTACTTCTGTCCTCCGACCGCTCGCCGGCGCCCAGACGGGATTTCTGTG  
CCTCTTCGACGGCGGGTTGCTCCCTCCAGCAGCAGCAGCACCCGCCCCGACCACGACCACACA  
GCCGGCTGGCACCCGCACCCCCACCCCTACAGTGGCGGTGGCGGTGGCAGCTGTGGTGGTGG  
GTACCAGTACCACCAGTGGCGCCGCGAGCGCGTGGCACGCGACGACGCTGGACCTTATGC  
AGCCGACAGCAAGCACCCGCGCTCCCGCCACCGCCGGCGCAGCGTTGTGGCCAGCAGTG  
CCGGAGAGGGCGGGCGCGAGGTTCGTCGCTCTCGCAGCGAGACCAAGGATGGCGACCGCT  
CGGGATGTAGCGGCTTGGACGCGTGGGCGCCCACTGGTGGAGCTCGTGTGCTGTGA

>JL49\_GRMZM2G028643

ATGGCAAGCCGCATCGCATCGTTCCCCTCCTTCCCTCGCCTTTGTGTCGTCACCGTCGCCACGT  
TATCCCCTCCTTCTTCCCTCCAGCAGCAGCCCGCCGCCCGCGTGGCACAGCCAGAGGGTTCT  
ATATAAGCTGCGGGTCGGACAAGGACGTGCAGGTAGGGAGCATCAAGTGGGCCAAGGATGAG  
GGCTTACCGCCGTTCGGGAACGCCTCCGCCATCAACAAGCCCCACCTCCTCCCCCTGCTCGCC  
GCGCTGCGTACTTCCCGGACGCCACCGCGCGGAAGTACTGCTACCAGTTGCCCGTCGTCAAG  
GGCACGCGTACCTTGTCCGCACCACCTACTTCTACGGCGGCTTCGACGGGGGCAAGGAACC  
GCCCGTGTTCGACCAGATCGTGGACGGCACCTGTGGAGCGCCGTCAACACCACGGACAACCTA  
CCGGCGCGGCATGTCCACCTACTTCGAGATGGTGGCGCAGGGGCAGGGCAAGACCATGAGCG  
TGTGCCTAGCGCGCCCGCCCCGACACGGCGTCCAGCCCCCTTCATCTCCGCGCTCGAGGTCATC  
GACCTCGCCGACTCCATGTACAACACCACGGACTTCAGCAGGTTACCATGACCACCGTGGTG  
CGCAGCCGCTTCGGCAGCAAGGGCGATATCGTCAGCTATCCAGATGACCCGTACAACCGGTAC  
TGGGCGCCGTTTCGCGGACGCCAACCCCATGGTGGAGAGCCACTCCTCCATCTCGCCCGACGA  
CTTCTGGAACCAGCCGCGCGCCAAGGCGCTCAAGGCCGGAATCACAACCAGCCGGGGCAAGA  
AGCTCGCCGTGCAGTGGCCGACCACGGAGCTCCCCGCGGCGACCTACTACGTGGCGCTCTAC  
TTCCAGGACCCGCGCACGGCGAGCCCCCTTACGCTGGCGCGTCTTCGACGTCGCGGTCAACGG  
CAACGACTTCTTCCGGGGGCTCAACGCCCTCCGCGGCGCGGCGTCATGGTCTACTCCAGCATGAT  
GCAGCTGTCCGGGAAGACGGAGATCTTGTCTCACGCCAACGAGACGTCCCCCGTCGGCCCCGC  
TCATCAACGCCGGAGAGATCTACCAGATCGTCCCGCTCGGCGGCAGGACCGCCACAAGAGAC  
GTGTTTGAATGGAAGACCTGGCAAGCAGCCTCAAGAACCTGCCTCCGACTGGGCTGGAGAC  
CCTTGTCTACCACAGCAACATTCCTGGACTGGGGTTGAATGCTCCAGGGATCACCCGTGCGC  
GTCTTGTCACTGGATCTAAAAAACCATGGTCTTTCAGGATCGCTACCCGACAGCATTGTACACTT  
GACAGGGATGAAAACCATCTATCTCAGTGGTAACAATCTCTCAGGCCCCATACCTGACTTGAGC  
AGCATGCACGCCCTGACTGCAGTGCGCCTTGATAGCAATCAGTTCAGTGGAAACGATCAACCCAT  
CAATGGAAAACTAGCCAATCTCAAGGAGCTACACCTGAACAACAACAATCTCACGGGCAAAAT  
ACCAGATGGTCTGAAAAACAAGCTGGACTTGATTTGAGAAGTGGGGGAACAATTTGAATGA

>JL50\_GRMZM2G163724

ATGCCACGGCTTACCTCACCTCCACCGCCATGGCCGGCACCAATGGCGCCCCCTCGCCTTCTC  
CGCCTCCCTACCACTGCCACTACCAGTACCAGCTCGACGCCACTGCTGCGACTACTAGCGCTA  
CTACAGCTACTATGCCTCGCCTCGGCGCTTAACCAAGACGGCATACTGCTGCTGTCTTCAAGC  
AATCCCTCGCCTCCGACCCCTCGGCTCCCTCTCCGGCTGGGGGTACGCCGACGTACGCCCT  
GCGCGTGGAAACGGCGTCTGCTCGCCGGACTCGCGAGTCGTACGCGTCGTCCTGCCAAC  
GCGCAGCTCGTCGGCCCCGTGCCAGGGAGCTCGCCCTCATCGAGAACCTCCGCCACCTCGA  
CCTCTCCGGCAACGCGCTCACCGGGACCATCCCGCCCCGATCTGCTCCGCGCGCCGGAGCTCC  
GCGTGTCTCGCTCGCTGGCAACGGCATTACCGGCGGCCTGCCGGAGCAGGTCCGGCCAGCTG  
CGCAGCCTCCGCGCGCTAACCTAGCCGGCAACGCTCTCTCCGGGGCCGTCCCGCAGAACCT  
CACCTGTGCCCAACCTCACCGCTGTCTCGCTCGCCAACAACCTTCTTCTCCGGCACGCTCCCC  
CGCGGGGGCTTCCCGGCGCTGCAGGTGCTCGACGTCAGCGCCAACCTGCTGAACGGCACCCCT  
GCCGTCCGACTTCGGCGGCGCCGCGCTTCGGTACGTCAACCTGTCTCCAACGGCATCGCCG  
GCGCCATACCGTCGGACATGGCCTCGCGTCTGCCGGCCAATGTCACCATCGACCTGTCTTACA  
ACAACCTCACCGGCGCCATCCCGTCCGTGCCGCGGTTCTCGGCGCAGAGGCCACGGCGTTC  
GAGGGCAACGCCGAGCTCTGTGGAAGGCCCTCGACAGCCTCTGCGGCTTACGTCCTCCTCC  
TCTGCTGCCGCGGAGCCCCAGCCCCGAACGCTACCGCGAAGTCGCCGCGGCGCATCGCGGC  
GATACCAGGGACCTACCGAGGCGCTTCCCTGGCGATGGTTCCAGCAGTGCCGCAGGCGCGT

CGGCGTCCGGGGAGCAGCGCGGCAGGATGCGGCTTGCTACCATCGTCGCCATCGCCGCCGGT  
GACGTGGCTGGCATCGCCGTCCTGTTCTGTTGTGGTCATGTACGTTTACCAGGTGAGGAGGAAG  
AGGCAGCGTCAGGAGGTGGCGGCCAAGCAGAGGACGGGCGTCGTGTTCAAGAAGCCGGATCC  
CGACGAGTCTCCGGACGCTGTCAGCCGGAGCCTTTCTGCTGCCTGCGCAAGAAGGCCGGCG  
ACGACAGCGACTACTCGGAGGAAGTCACGGACACGTCGCCGGCCTCCTTCGCAGATCACAAGA  
ACGGCAAGGCGGCCGGAGCTGAAGCGGCGAGCAATAAGAAGATGGGCGGGGACGGCGCGGT  
GCTAGTGACGGTGGACGGCGGCGCGGAGCTGGAGCTGGAGACGCTGCTGAAGGCCTCGGCG  
TACATCCTTGGCGCCGCCGGCAGCAGCATCGTGTACAAGGCCGTTCTGGCCGACGGCGCGGC  
GCTGGCGGTGCGCCGGATCGGCAGCAGTGTTCGGGGTCCGGCGCTTCGGCGAGCTGGAC  
GCGCACATGCGCGCCGTGGCGAAGCTGCGGCACGACAACATCCTCCGCCTGCGCGGCTTCTA  
CTGGGGCCCTGACGAGATGCTCATCATCCACGGCTTCGCCATCAACGGCAATCTCGCCAACCA  
CTCCGTTAAAAGTACGTTATCTATTTCGGAATTCGGTCCATCATCATACCCACCCCGGGCCGTT  
GCCAAAATGACAATAAATGGCCGCATGCAGGGAAGCAGGGGTCGTCGCCGATCAACCTCGGGT  
GGAGCGCGCGGCTCCGCATCGCGCGCGGCGTGGCGAGAGGCCTGGCGTACCTCCACGACAA  
GAAGTGGGTGCACGGCAACGTGAAGCCAAGCAACATCCTGCTGGACGCGGACATGGAGCCGC  
TGCTGGCGGACCTCGGCGTGGACCGGCTGGTCCGCAGCGCGGACGGCGGCGGGCTGACGAA  
GCCGTCGTCGGCGGCGCTGGCGGGTTCGGTTCGGCGGGAGCAAACGTTTCGGCCAAGAGCCTC  
CCCGACCTGTCGCCGCCGCCAGCCACGTAGGCGGCACGGCCGCGCAACCGGCGAGCCCGG  
CCGTCGACACGGCGGCGCACTACCGGGCGCCGGAGGCCGTGAGGAGCCCAGGGCGAGCGG  
CAAGTGGGACGTGTACTIONCGTTCGGCGTGTCTCTGCTGGAGCTGGTGGCCGGGCGCGCTGA  
CGAGCCTGGAGCTGTGCCAGTGCCTGCGCGGAGGGGAAGGCGCAGGCGCAGGCGCTCGG  
GGTGGTGGACCCACGCTGCGCCGCGAGGTGGAAGGGCGGGAGGAGGAGGAAGCGGTG  
GCGAGCTGCCTCCGGCTGGGCGCCGCGTGTGCGCCATGGTGCCGAGCAAGAGGCCGTCCAT  
CAGGGACGCGCTGCAGGCCGTGGAGAGGATGATACCTGCTGCGGTTGCTTCGTCAACATC  
CACGGCAGCATCACACCGTCATTGA

>JL51\_GRMZM2G178102

ATGAAAGAGAGAGAGAGAGTGAACAGAAAACATCTATTGCTGCTGCAGAGCAGCAGTACTGTAC  
TGCTATTAACAAGCCAGAGCTCTGCTGCTACTGTCTCTCCTCCTCCTCACTCCACCCTGC  
CCACTCCCATCCCACGCGAGCACAACCACCACCTACTCCCTACTCCCTACACTACTCCCCCGC  
AAGCACGCCAGCGCCATGGCCATGGCGGCAGCGCGCACGGGGGCTGCTACTCCGCCTCCG  
CTTCCTCCTCCTCCTGCACTACTAGCGGGTCCGCTGGCGACGATGGCGGCGGTGGCGAGCA  
GGGAGAGGCTCTCCCCGGGCGCCGCGCCGAGGTGGACGCGGGCAAGTACGTGCGGTACAC  
GCCGGAGCAGGTGGAGGCACTGGAGCGCGTCTACAGCGAGTGCCCAAGCCCAGCTCGCTGC  
GCCGGCAGCACCTCATCAGGGACTGCCCATCCTCCGCAACATCGAGCCCAAGCAGATCAAGG  
TCTGTTCCAGAACCAGCAGATGCCGGGAGAAGCAGCGCAAGGAGTCTCTCGTCTACAAACCG  
TGAACCGGAAGCTGAGTGCATGAACAAGCTGTTGATGGAGGAGAATGACCGGCTGCAGAAGC  
AGGTTTCCCGTCTCGTCTTTGACAACGGGTATATGAAGAATCGACTCCACAGTCTTCTGTAGC  
CACCACCGACACAAGCTGTGAGTCTGTGGTGACAAGTGGTCAGCACAACCAACAGCAAAACCC  
AGCAGTTCTGCATCCTCCACAAAGGGATGCGAACAACCCAGCAGGTCTACTCGCTATTGCTGAG  
GAGACATTGGCAGAGTTCATGTCCAAGGCGACTGGAAGTCTGTCAACTGGGTGCAAATGGTT  
GGGATGAAGCCTGGTCCGGATTCCGTTGGAATCATCGCTGTTTCGCACAACCTGCAGCGGCGTA  
GCAGCACGAGCTTGGCGCCTTGTGAGCCTTGAGCCACAAAGGTTGCTGAGATCCTTAAGGAT  
CGTGCATCGTGGTATCGCGATTGTCGGCATGTTGATGTCCTCCATGTTATCCCTACGGGTAACG  
GTGGAACGATTGAGCTGATCTATATGCAGACTTATGCACTGACAACCTCTCGCGGAACCACGAGA  
CTTTTGGACGCTCCGATACACTAGTGGTCTTGACGATGGCAGTCTTGTGATCTGCGAAAGGTCA  
TTGACTCAGTCCACTGGAGGTCTTCTGGACCTAACACTCCAAATTTTATCAGAGCTGAGGTGCT  
TCCTAGTGGTTATCTGATTCGACCCTGTGATGGGGGAGGTTCCATGATTTACATTGTGGATCATG  
TTAATCTGAATGCTTGTAGTGTGCCTGAGGTTCTTCGGCCACTCTATGAATCCCCTAAGATACTG  
GCACAGAAGATGACTGCGGCGGCGTTGCGACACATTAGGCAAATTGCACATGAGTCAAGTGGT  
GAAATGCCCTATGGTGTGGGCGACAGCCGGCTGTTCTCAGAAGTTTCAGTCAAAGGCTCAGC  
AGAGGCTTCAATGATGCTGTGAGTGGCTTTCCAGATGATGGCTGGTCTTGTGTTTGAACACCG  
ATGGTGTGAGGATATTACAGTTACAATCAACTCATCTCCAAATAAACTTGTGGGTCTCATGTC  
AGCGCTTCCCATTATTTTCTGCTATGGGGGGTGAATCATGTGCGCAAAAGCATCGATGCTGC  
TGCAGAATGTGCCACCTGCTCTACTTGTGCGATTTTTGAGGGAGCATCGGTCTGAATGGGCTGA  
TCCTGGCATCGATGCTTATTCTGTGCGCTTTTGGAGGGCCAACCCATACACTGTTCCAGGTTTAA  
GGGCTGGTGGGTTTATGGGCAACCAGGTTATACTGCCCTTGCACGCACCTTGGAGCATGAAG  
AGTCCTTGGAGGTTATTAGGCTTGAAGGACATGGCTTTAGCCATGAGGAGGTGCTTATGTCCCG

GGATATGTTTCTTCTACAGCTGTGCAGTGGCGTCGACGAGGATGCACCTGGTGCCTGTGCACA  
GCTTGTCTTTGCTCCTATTGATGAATCTTTTGCCGACGATGCACCGTTGCTGCCCTCAGGCTTCC  
GTGTGATACCGCTTGATGCTAAGACGGATGTGCCAACGGCCACCACACGCACGCTTGACCTTG  
CCTCTGCGCTCGAGGTTGGATCAGGTGGAAGCGGCATGCGCGCTTCATGCGATGGTTCGGCA  
CGTGCGCCACGAGATCGGTCTGACCATCGCCTTCCAGTTCTCGTTGAGAACCACCTTCGCG  
AGAGCGTGGCGGCAATGGCCAAGCAGTACGTGAGGGGCGTGATGGCTCCGTGCAGAGGGTG  
GCCATGGCGATCGCTCCTTCTCGCCTCGGTTGCGGTATCGAACTGAAGCATCCGCCGGGCTCT  
CCCGAGGCACTTGCCTAGCTACGTGGATTGGCAGGAGCTACAGGGCGCACACTGGAACGGA  
GATCCGCTGGTTCGGACACCGAAGGCGCGGACTCTCCACTGATGCTGTTCTGGAAGCACAGCGA  
CGCGATACTCTGCTGCTCTGAAGCCGCCGGCTTTCACGCTCAAGTTGCGCAACAGCGCCGG  
CTTCGACATCCTGGAGACGACGATGGTGAACATCCAGGACCTGCCGCTGGAGGCGGTCCCTCGA  
CGAGGAGGGCCAGAAGGCCCTGTCCGCGCAGCTCCCCGCGATCATGCAGCAGGGCCTGGCGT  
ACCTCCCCGGTGGCGTGTGCAGGTGAGCATGGGGCGGCAGGCGTTCGACGAGCAGGCAGTG  
GCGTGAAGGTGGTGGGTGACGACGGCGCCCCGAGTGCCTGGCGCTCATGCTCGCCAACTG  
GACCTTCATCTGA

>JL53\_GRMZM2G163975

ATGATGGCAGCCTCGTCGTCGTCGTCCTTCAACCTCAGTGATCATCTCGTTCAAGATGACCTCC  
CGTGGCCTGCTTCTTCTTCTTCTTCTTCCCTCCAGCTGCCATTTGCTCCTTCTCATCCTCCTCACGGC  
GCCATTATTGGAGGCAGCCAGCAATGGTGGCAGCAACCTCAAATGCTAAACTGTGCAGACCGG  
CATCCCTCCGACGAGCTTGAGGTCCTCCTCTCAGCACAAGGCAGCCACCACCACCACCACCAT  
CCTTCTTCTTCAAGTATCCATCCTCAGCTAAGCTCGCTGCTAATGATGCAAGACCTAGGGTTCCA  
ATGGAGCAGCTGCGGCAGCTTCGTGGACACCTCCTCGTCGTCGCCCCATGCCACCACCCTGGT  
GAACGGCCAGCAGCACGACGGCCACAACAAGATCAAGGAGTGGGACCGCCCGCTCACTGCTA  
ATAACTCATCAAGGTCATCGTGTGCGAGCACAGCTATGGCTTGCCGAGATGTCGTCCTCGACGG  
CGGCGGCGGCGGCGGCGCCTCCCTGCCATGGCCGCGCTCGCCGCCGATCTTGACGACGGCACC  
GTGCTCCCGGCGAGCGTCAACGTCCCCCGGACGACGACGACGCGCCAGAGGGCATTCCCGGC  
GGCGCCGCCACCTCTCCCCGGCGACGCGTTCGAGATACTGGCTTCGTGAGGCTATGCAAGAC  
CCTGCTGCTTAGCCAAGCTTCTTCTTCCGTAAGTACTGCTCCATAATGGCACGACGATGCCTTTGTTGA  
GATCAGAGCATGTGCCCTATGGCCCTCCTGCTCCTGCTCATCCCCAAGGACCATCCATCGGCAA  
CTACAAGCAGTGCATGCAGATGGGCGCGTCTTGTGGAGGCCGCGCGCAGCACGAAGCGGCAT  
GTCAAAGCATGGCGGCGGCAGCAGCACGCCAGCACTGCCAGTGGTGGCGTCGTGAAGAAG  
CCTCGAGTCGAGCAGCGGTCCCTCCACCATCGTCCCTTCTTTCAAGGTAAGGAAAGAGAAATTAG  
GGGACCGGATCGCTGCTTTCAGCAGCTCGTCTCACCGTTTGGCAAGACTGATACCGCATCTGT  
GCTCATGGAGGCCATCGGTTACATCAAATTTCTTCAAGATCAAGTCGAGACTCTGAGCCGCCCC  
TACCTGAAATCCTCCAGAAGTAAGAAGCCCAGGCCGACACCGCGGGGTTCTTCAAACGCGAGC  
GCTGGGGAGCTGGAGGAAACGAGGCCTGACCTCCGCAGCAGAGGGCTCTGCCTGGTGCCTCT  
CTCGTGCACGTCTACGTGACCAACGAGAACGGAGTCTGGGTTCCACCGAATTTTAGGGCAA  
CTAA

>JL54\_GRMZM2G077219

ATGAGCGCGGGTGCAGCCCCGGTCCGTGCTCGTCGTCGTCCTTCTTCCGCTGCCTCTTCTCGTC  
TCCATGACCCACGGCGGCCACCAGCAGCCGGCGCATGTCGGAGCGGACCCGCGCTCACCACC  
GATCGATGGCGGCGAGCACGCAGAGCAGCGGCAGCAGCTTAGCAGGCTGGGCTCCAGGCCG  
CCGTGCTGCGACCGCAAGTGCGGCGCGTGCAGCGCCGTGCAAGGCCGTGCAGGTGCGCGCCG  
GCGCCGGCGCCGCGGCGGAGCGCCGCCTCCGCCCGCGCTGCGCCAACTACGAGCCCGTCCG  
GTGGAAGTGCAGGTGCGGCGCCGCGCTTTCGACCCTTGA

>JL55\_GRMZM2G082586

ATGGCACTGGAGGCCGTGGTGCTTTCCAGCAAGGCAGTCGCTTTGGGTGTGGTGCCATGGCA  
GCAGGAGGGCCTTGAGTGGCCTGTTTTTATGTTGAATGGAGGGCGTGTCGAGATCGGTAGT  
GGCGCTGGCGGCGGCCGGGACGTGGCCGGGTGCTCGCCGCCACAGCTCCTGCAGGAGCCGG  
CTGCCCGCGCGCTGCCTGTGGCGTTCGTCGGTGGGGAGCGCGAGTGGCGGCGCCGGTTCAGGA  
TGCCCCGGCGGCACTTGCTGTGACCGCGACAGCGGCGGCGGAACCGGAAGAAGGAAGCGG  
CGAAGGATGAGGCCACTGAAGAACGAGGAGGAAGTGGAGAGCCAGCGCATGGTCCACATTGC  
CGTGGAGCGCAACCGGCGCAAGCAGATGAACGAGTACCTCGCCGCGCTCCGCTCCCTCATGC  
CGCCCGCCTACACGCAACGGGGCGATCAGGCGTCCATCGTCGGCGGCGCGATCAAATTCGTC  
AAGGAGCTGGAGCAGCTGCTCCAGTCGCTGGAGGCGCAGCAGAGGGCTTCTCCCGGGCGGCA

GGGCCCGCGTGCGCCGTCGATCCGGACGACGCAGGGCCGTTTCGCGGACTTCTTCACCTTCC  
CGCAGTACTCAATGTGCGCTGCCGCGGGCCCATCAGAGAACCCCGGCCGACGCCGAC  
GCCGAGCAGGAGGCGTCCGGGTCAAGCCGTCGGGCGTGGCCGACGTGGAGGCGACCATGG  
TGGAGAGCCACGCCAACCTGCGGGTGTGTCCCGGCCGCCGAGGCAGCTGCTGCGGCT  
GGTGCTGGGGCTCCAGGGCCACCGCCTCACCGTGTCCACCTCAACATGAGCAGCGCCGGCC  
ACATGGTGCTCTACTCGTTCAGCCTCAAGGTGGAGGATGATTGCCCGCTCACCTCAGTGGATGA  
GATTGCAGGTGCGGCTCATCAGATCGTCGAGAAGATCAACGAAGAACAAGGCGGCGGCAGCTT  
AGAGTAA

>JL56\_GRMZM2G171365

ATGGTGCGGGCAAGACGCAGATGAAGCGGATAGAGAACCCGACCAGCCGCCAGGTACCTT  
CTCCAAGCGCCGCAACGGCCTGCTCAAGAAGGCGTTCGAGCTCTCCGTCCTCTGCGACGCCGA  
GGTCCGCTCGTCTCTTCTCCCGCGCGGCAAGCTCTACGAATTCCGCCAGCGGAAGTGCAGCA  
GAAAACGATTGAACGTTATAGAACATACACAAAGGATAATGTCAGCAACAAGACAGTGCAGCAG  
GATATTGAGCGAGTAAAAGCTGATGCGGATGGCCTGTCAAAGAGACTCGAAGCACTTGAAGCTT  
ACAAAAGGAACTTTTGGGTGAGAGGTTGGAAGACTGCTCCATTGAAGAGCTGCACAGTTTGA  
AGTCAAGCTTGAGAAGAGCCTGCATTGCATCAGGGGAAGAAAGACTGAGCTGCTGGAGGAGCA  
AGTCCGTAAGCTGAAGCAGAAGGAGATGAGTCTGCGCAAGAGCAACGAAGATTTGCGTGAAAA  
GTGCAAGAAGCAGCCGCTGTGCCGATGGCTTCGGCGCCGCTCGTGCCCGGCAGTCGACA  
ACGTGGAGGACGGTCACCGGGAGCCGAAGGACGACGGGATGGACGTGGAGACGGAGCTGTA  
CATAGGATTGCCCGGCAGAGACTACCGCTCAAGCAAAGACAAGGCTGCAGTGGCGGTCAGGTC  
AGGCTAG

>JL57\_GRMZM2G098813

ATGTTACTTGCTCTTGTTCGATCATACCGCAAACCTCGCAGCGCTGTCCGACGAGCGCGACGCCG  
CGGCCAGCGGCGGCGGCATGGCAGAAGGCGAGGCCGCGCAGGAGGATGGTGACGACGACCCG  
CGGCAAGAAGGGCAAGAAAGGGGTCTTGGCACGAGGAAGGGCAAGAAGGCGAGGAGGAAG  
AAGGAGCTGAGGCCGCTGAACGTGCTGGACGACGAGAACGACGGGGACGAGTACGGCGGCG  
GGTCCGAGTCGACCGAGTCGTCCGCGGGAGGCTCCGGGGAGAGGCAGCGGGAGCACCCGTT  
CGTGGTCACCGAGCCCGGCGAGGTGGCGAGGGCCAAGAAGAACGGGCTCGACTACCTCTTCC  
ACCTGTACGAGCAGTGCCGCGTCTTCTGCTCCAGGTGCAGTCCATCGCTAAGCTGGGCGGCC  
ACAAATCCCCTACCAAGGTGACCAACCAGGTGTTCCGGTACGCGAACAAGTGCGGGGCGAGCT  
ACATCAACAAGCCCAAGATGCGGCACTACGTGCACTGCTACGCGCTGCACTGCCTGGACGAGG  
AGGCCTCCAACGCGCTGCGCCGGGCGTACAAGTCCC GCGGCGAGAACGTGGGCGCCTGGAG  
GCAGGCCTGCTACGCGCCGCTCGTCGAGATCGCCGCGCGCCACGGCTTCGACATTGACGCCG  
TCTTCGCCGCGCACCCGCGCCTCGCCGTCTGGTACGTGCCACCAGGCTGCGCCAGCTCTGC  
CACCAGGCGCGGGGGAGCCACGCCACGCTGCCGCGGACTCCCGCCGCCCCCGATGTTCTA  
G

>JL58\_GRMZM2G039074

ATGGCTACTACTACTGCCGACGCCCCCGACCTCTCGCTGCATATCAGCCCTCCCTCGCCGCC  
GATGATGCTAGGAGCAGTGACGTGCTCTTCTCCAAGCAGACGTTGTGCCTCGGACTCGTTCAGA  
CGACGACGGCGGCGGCATGATCAGGATGGCCAATGCGACGACGTCCAGCAGCAGCAGCGG  
CAGCGACTGCACCAGCAGCCTAGCCAGATCCAGAGGTTCAAGAAAACCTCGTCATCGTCGGCG  
GCGTTGTTATCTGCCGGAGGAGGCACGACGAGATCTGGGAACGGCAACAGCGGGGGCGGGAA  
GAGGAGCTCCAGAGCGCCGAGGATGAGGTGGACCACGGCTCTTCATGCACACTTCGTCCATGC  
CGTAGAGCTCCTTGGCGGCCATGAGAGAGCAACGCCAAAGTCAGTGCTGGAGCTGATGAACGT  
TAAGGATCTCACATTGGCTCATGTAAAGAGCCACTTGCAGATGTATCGAACAGTGAAGGGAAACG  
ACGGCAGACAGATCATGTGCTGCAGGCCATGTCCAGATGAGAGACATGGGCTTTCTGCACAGG  
GGTTGTGAACTGAATGGCTTCGAAGCGTTTAGCAACGGTACTTCTAATGCTACCGCCAATAATA  
GAATGCAGGCAGTGCCGGGTGCGCCGGCAGGGGAAGCATGCTGAGGTAGCCTGGTTCTTGCGG  
CCACCCTTGGCACACCAGAGTAGTGGTGGTGGTGGTGGTGGTGGGGCGGTGCCGCTTCCGCT  
GCCGCTGCCCTGCCCTACCTCATGTCTGCCACCACAACCGCTACTTGCTCTCACAGAATCAG  
GGATGGAGGACCAGAGGCGCGCATCAGCAAGACGCTGCCGCCCGCCCGCGCTCGTCCTAGG  
CCAGCAGGACAGTGCGCGGCGTCTGCATCCAGGCTTCCCCGACACGGCCATCAGCAGCAGCA  
GACCGTCATCCTGGAGCGCAGGCGTGGCAAGCCGCTGGTCTGTCGTCGACGGCGGCGGCGCCT  
TCGCCGTCAAGTGGCAGGAGTAGCATCAGCAGCGGCACGGAACAGCCAGCAGCATGCAGCTG  
GACGATGATGACGACGAACAAGCAGCAGCAGCAGCCGCCCGCTCGACGTATCATCATCAAG

GGTCGTCGCGGTACCGAACCTGGAGATGAGCCTGGGGAGGCAGGGGTGGCAACACGACCTGC  
AGGATCATCATCCGACAGCAGCAGCAGCAGCAGCGCAGCGGGGAGTCCACGGCGCCAAAAGAG  
CTGACCCCCGGCCTCCTCAAGTGCTTGTGA

>JL59\_GRMZM2G139324

ATGATGATGATGATGATGGACAGGCAGCTCGTCAGGCAATGCGACATGGAGGTCATGAGGATG  
GCCATGCTCAAGCACGAAGAGACCTTCCGGCAGCAGGTTTACGAGCTGCACCGCCTGTACCGC  
ATACAGAGGGAGCTGATGAGCGACCTAATAACGACCCGATACGACGACGAGCCGCTGCTGCTG  
ACGACCGCCGGCCGGCGCAGCAAGCAGCCGCGCCGGGCGCTGGACCTGCAGCTGCCAGCCG  
ACGAGTACATCGTCAGCGCCGACGAGGAGTCGGACGCCGCCGGCGCGGAGCTGGAGCTGAC  
GCTGGCCGTTCGGCGGGCGCTGCGCAGCCGGCGGCCGGCCGGCGCAAGAGCAACAGGGCGCCG  
GAGGCAATTAGCAGAGCGGCAGCAGCGCGACAACAACGACGCCGCCGCCGCCGGCGCGCGC  
TCCTCGCCGTTCCGGTCCGACTGCTCCGGCGCGAGCGCCCTGTCGTCGCCGCCGCCCTTCGTC  
GGCCGAGTACTACTCCGACGACGGGCCGGCGGCCGGCGGCGTGCCAGAGGGCCGTTGCGTTC  
GACCTTGAGAGAGAAGGCGACGGCGTGATGAGGCAGCAGCACGCGCCGTGGCTGGCGCAGT  
GCCAGCAGTACCTCAGCCTGAGGATGACATGA

>JL60\_GRMZM2G061314

ATGTCATACCCCGGCTCCTCTGCTTCTCGGTTCCCGCCGTTCCATGTCCGCCACAAGGTGCC  
GCCACAAGGGCAGACCGGCGGCAGAGGTTGTACCGATCGCTCTGGCCACGTCGCCGGCCGG  
ACCATCAACCACCGCGCGGAGCATCAAGCAGCTGCCATTCAAAGCCCGTTGAAGCATCGAAG  
GATTTCCAGCCGTGAGCGTGTGCGGTGGCGGCAGCGCCGGGTCGCCGGGATGGGCAAGATG  
AACTGCTTCTCCGGCCTGCTCAGCGGCAAGAGCAAGGCATTCAAGGGTGGCAACAAGGGCGCT  
TACGCCAAGAAGGGCGGCCAGTGGTGGCAACGATTGCCCAAGGTGAAGCCGGTAGAGTTCGTA  
GACATGGCGGGCACTGCTGTGACGACTTCGTTCGGCAGACGCGGCGGAGGCAGCGTTCATGC  
GTCCGCATGCAGCAGTAGCTTTGTCGTTACGCAGCCACCGAGCTGCCACGCCATGCCACTGC  
CGAGAACGGTGAAGACGAGGCCGCGGTTAAACAAGGACTCATCCTCCGCCGGCGCTGGCTCGC  
CCGGTTACAGCATTGGCCGCATGTCGCCAACGGCATCGCCGAAGCTGACGCGCTCCTGCTCCA  
ACATGGAGACGGCGAGGTCTGTCCCCCGCCAGGGTCCGACTCCGACCTGCCGGCGAGGTCA  
CGCTCCACAACGACCTGCTGAAGAACCTGCCCCCCGGAAGGCCGACGACCGCCCGCAGCGG  
CTTGAGCCCGACGGCGTCTTCAGGTCTCTGCTGCTCCGCCGACCGCGTCTGCTGAAGAAACG  
GTCGTCGCGGCAGGTGCTCCCGTCCCGGAGCCGGAAGCTGTGGTGGCAGACGTTCTCTGGA  
GCCACCGCAACCTGCACCGGCCGGGCGCGAGCGCGACCACTCCACGCTGCCGTCTGCGTGG  
AAAGACGGCCGTCCCGTGCACCACGGGTACACGTCCGACACGCTGGGCACTGCCACCGCGGA  
CGCCAAGAACAAGGGCGTTCGTCGCGGTGGAGGAGGACCCCGTCCCGAACCAGTGGGTGCGGT  
TCTCCGCCGAGGCGTCTCCACTGGACCGGGTACGCGCGTGGGTGAACAGCCTCGGGGACGCC  
TCGTTCCACGCCGTGACGAGGAGGACGACGCCACGCTGCACGGCGCGCGACCGCGGCCCC  
GACCGAGACGCTCTGAGATCGTGGAGCTGTGGACGGCCGGCGGCAAGAGGCAGCCACAGGC  
GAAGCGGCGCGCCGCGGACGAGGCCGCCCGCCAGGCGAGCGGCGTCTGTCACACGCTC  
AACGCCTTCTCCTCCGTGCGGCACATCGCCGGCATGGGGTCCGGACCGTCCCGATGATCGCC  
GCCTTCTCGACCCTCCGCGCCGTCAACCTGTCTGGAAACATGATTGTGCAAATCACCGCTGGAT  
CGTTGCCCAAAGGCCTGCACTCACTGGACCTGTCGCGGAACAGCATTGCAGTCATCGAGGGGC  
TGCGGGAGCTGACGAGGCTGCGGGTGTCAACCTCAGCTACAACCGGATCTCAAGGATCGGC  
CATGGCCTGTCGAGCTGCACGGCCATCAGGGAGCTGTACCTGGCCGGGAACAAGATCAGCGA  
CGTGGAGGGGCTCCACCGCCTGCTGAAGCTGGCCGTCTGGACGTGAGCTTCAACAAGATCAG  
CACGGCCAAGTCCCTGGGCCAGCTCGTGGCCAACTACGGCTCGCTGCGGGCGATCAGCCTGC  
TGGGCAACCCGGTGCAGGCGAACACCGGCGAGGACACGCTCCGCAAGGCGGTGTCCGGCCCT  
GCTCCCGCGGATCGACTACCTGAACAAGCAGGCCGTGAAGCCGCAGCGCGCGCGGAGGTGG  
CCAAGGACAGCGTCGCGCAGGCGGCGCTCGGGAACAACGCCGGGGGAGCTCGCGGAGGGC  
GCTGGCGCGCCGCTCAGCCAGAGCCCCGGCTCGTTCGTCGGGCAAGGGCCGGGGCCGGGGC  
GGCAGGGAGGGGAACGGCAGCCGCAGGGGCAGCAGGAGCAGGTTCTGTCAGGAGGCCCCAGA  
GCTCGAGCTACCAAGGAGATGAGGCCAAAACATGACAACGGTGTGGGCTTGAAGAGGGAGAAG  
AAACAAGTCCGTGCGTTTAA

>JL61\_GRMZM2G151955

ATGCACTGCCGCCCTGCCCGTCCCAGCTCTCGCTCGTCTTTCTCCTCCTCCTCTCGCTCGCAC  
CCATCATTTCCGGCACTCCCCTTCCCGGAGCCAGCTCTTCCGATGGCGTGCAGCGGCCTCCGCC  
TCTCGCTCCCCGCCGCGTCTCGCCCTCCTCCTCCTCCCCTCCGCGCTCGCTTCCGAGCCCC

TCAACCCCGAAGTGCAGGCGTTGATCGCCATCAGGCAGGGGCTGGTCGACCCGCACGGCGTG  
CTCAGGAGCTGGGACCAGGACTCGGTGACCCCTGCAGCTGGGCCATGATCACCTGCTCCCC  
GCAGAACCTCGTCATCGGCCTGGGAGTGCCGAGCCAGGGCTTGTGCGGGACTCTGTCCGGGA  
GGATCGCCAACCTCACCCACCTCGAGCAAGTGCTGCTGCAGAACAAACATCACGGGGCGGC  
TGCCGCCGGAGCTGGGCGCGCTGCCGAGGCTGCAGACGCTGGACCTCTCCAACAACCGCTTC  
TCCGGCCGCGTGCCCAACACGCTGGGCCGCATCACCACCCTCCGATACCTGAGGCTGAACAAC  
AACAGCTTGTCCGGGCCGTTCCCCGCGTGCCTGGCCAAGATCCCGCAGCTCTCCTTCTGGAC  
CTGTCCTTCAACAACCTCACTGGCCCCGTCCCGCTTTCGACACGGACCTTCAACGTCTGG  
GCAACCCGATGATATGTGGGAGCAACGCCGGCGCAGGGGAGTGCGCCGCCGCGCTGCCGCC  
GGTCACCGTACCCTTCCCGCTGGAATCCACTCCGGGCGGCAGCAGGACAGGGACAGGGGCGG  
CGGCAGCGGGCAGGTCAAAGGCTGCTGGCGCGCGGCTGCCGATCGGGCTAGGGACAAGCCT  
GGGCGCTCCTCCCTTGTGCTCTTCGCCGTGTCCTGCTTCTGCGGGCGAAAGCGCCGGCA  
CACGGGGGGGGCGGCCCTCCTCCGTTCTCGGCATCATCCACGAGCGGGGCGGCTGCGACCTGG  
AGGACGGCGGGCGGCGGTGGCGTGGTGGCGGGCGGCGCGGCTGGGGAACGTGCGCCAGT  
TCGGGCTGCGGGAGCTGCAGGCGGCCACGGACGGGTTACGCGCCAAGAACATCCTGGGCAAG  
GGCGGGTTCGGGAACGTGTACCGCGGCCCGCTCGCCGACGGCACCACGGTGGCCGTGAAGC  
GGCTCAAGGACCCCAAGCGCTCGGGCGAGGCCAGTTCGCGACGGAGGTGGAGATGATCAGC  
CTCGCCGTGCACCGCCACCTGCTGCGCCTGGTCCGCTTCTGCGCCGCCCTCGGGCGAGCGCCT  
CCTCGTCTACCCCTACATGCCCAACGGCAGCGTCGCGTCGCGGCTGCGAGGGAAAGCCGGCGC  
TGGACTGGGCGACGCGGAAGCGGATCGCGGTGGGCGCCGCGCGCGGGGCTGCTGTACCTGCA  
CGAGCAGTGCACCCCAAGATCATCCACCGCGACGTCAAGGCCGCCAACGTGCTGCTGGACG  
AGCACACGAGGCGGTGCGCGGCCACCGTGGGCCACATCGCGCCCGAGTACCTCTCCACGGG  
GCAGTCGTCGGAGAAGACGGACGTCTTCGGCTTCGGGATCCTGCTGCTGGAGCTCGTCACGG  
GCCAGCGCGCTCCAGCTCGGCAAGGCCTCCGGCGCCCTGCACAGCCAGAAGGGCGTCATG  
CTGGACTGGGTGAGGAAGGTGCATCAAGAGAAGATGCTTGACCTGCTGGTGGACCAGGACCTG  
GGCCACACTACGACAGGATCGAGGTGGCCGAGATGGTGCAGGTGGCGCTCCTCTGCACGCA  
GTTCCAGCCGTGCGACCCGGCCCAAGATGTCCGAGGTGGTCCGGATGCTGGAGGGAGACGGCC  
TGGCCGAGAAATGGGAGGCCACGAACCGGCCGGGCGTGGCCGCGGGGGCGCCGTGCCACGA  
CGCGCTCGGCTACGACCACCGCAACGACTCCAACGGCTCCGTCTTCTTCAACGACTTCCACGA  
CAACGACAGCAGCCTCAGCAGCGACGAAGCGCGGTGATCGACATGGTGGAGGAGATGGAGC  
TGTCGGACCAAGGTAG

>JL62\_GRMZM2G159953

ATGGCCGCGCTCACCTCCGGTTATTGCCGCTCTTGCTGCTAACGCTGACAGCGGCGGCCAAG  
AACGTCACCCTCGACTCTGCCATACTATCCTTCGCGGACCTCACGCTGCTGGGGGACTCCTTCC  
TCCGCAACGGCTCCGTCTGGCTCACCCGGGATACCGACGTGCCCTCCTCCAGCGCCGGCACC  
GTGCTCTGCACCCAGCCCGTTCGCGTTCCGGGGCCCCGACGCCACGGCCTCCAATGCCACCGC  
CGCCGTGCGATCGTTCGCGGCCAGGTTCTCCTTCGTCATCGCCAACCCCAACGCGGGCGCCG  
CGGGGGGCGACGGCATCGCGTTCTTCATCTCCCCGACCGCACCCACGCTCGGGCGCACCCGGC  
GGTACCTCGGCCTTTCAACTCCTCCAACCTCCGCCGACCCAAGAACGGCTCCGCGTCCGCC  
ACCATTGTCGCCGTGAGTTCGACACCATGGCCAACCCGGAGTTCGCCGACCCAGCGACAAC  
CACGTGCGCCTGGACCTCGGCTCGCCGGTCTCCGTACCGCGGGCCGACCTCGCCGCATCTGG  
GGTCGACCTCAAGAGCGGCAACGTACGACGGCGTGGATCGACTACCGCAGCGCGGACCGCC  
GCCTGGAGGTGTTCTGAGCAGCTACGCCGTGGCCGCCAAGCCGAAGCGGCCGGTCTCTCC  
GTGCTGTGACCTCTCGCCGTACATCAAGGAGGCCATGTACGTCCGCTTCTCGGCGTCCACA  
GAGGGGAGCACGCAGCAGCACACCATCAAAGGGTGGACCTTCCAGACGTTCCGGCTTCCCGCC  
CACGGCCAACCTTTGAATCCAATGCCACCAGCAACTCTTCAGAGCCGGCCGCGCCAGC  
GCCACCGCCAGCCTCCAACGCCCCCAACAGCCACAAGAGGAGGGTCCGGATCGCGCTTGGAA  
TCTCCGGCCCCGTTGCGCTTGCCCTCGCCTTTCATCTTCTTCGCTGGGTCTCCATCAAGAAGCT  
CATAGAACTCACCTCCCGGACCGACGCCGCTTTCGACCGAGCTGGTCAAGGGCCCCGAGGAA  
GTTACGCTACAGGGAGCTGAGCGCGGCCACCAGAGGGTTCACATGAGCAGGGTCTCGGCA  
AGGGCGCGTTCGGGACTGTGTACAAGGCCGCCATGCCGGGAGCTGCCGCCACCACCTACGCC  
GTTAAGAGGTCGACGCAGGCGCACAGAGCCGGAGCGAGTTCGTCGCCGAGCTATCCGTAT  
CGCGTGCCTCCGGCACAAGAACCCTTGTCCAGCTTGGAGGGTGGTGGAGGAGAAAGGCGAGC  
TGCTGCTGGTGTACGAGTACATGCCCAATGGAAGCCTGGACAAGGCCCTTACGGCGAGCCTT  
GCACGTTGTCGTGGCCGCAGAGATACCGGTGCGCCGCCGCATCGCGTCCGTGCTGCTGAC  
CTCCACCAGGAGTGCAGCAGCGCTCATCCACCGGGACATCAAGACCAGCAACATCCTGCTG



GACGTCAACCTGAGCCCGCGCCTGGGCGACTTCGGGCTGGCCAGGCTCATGGACCACAACAA  
GAGCCCCGTGTCCACGCTACCGCGGGGACCATGGGCTACCTCGCGCCGGAGTACCTTCAGT  
CCGGCAAGGCCACCGAGCAGACCGACGTGTTACAGCTACGGCGTGGTGTCTCTCGAGGTGTGC  
TGCGGGAGGCGGCCCATCGACAAGGACGAGCGCGGGGGGGCGGCAGGGGGCGGCGGGGGC  
AAGAACGTGAACCTGGTGGACTGGGTGTGGCGCCTCCACGGCGAGGACAGGCTCATCGAGGC  
CGCGGACGCACGGTTGGCCGGCGAGTTTGACAAGGCCGAGATGCTGCTGCTGCTGCTCGTGG  
GGCTGAGCTGCGCCAATCCCAACTGTGAGGAGCGTCCC GCGATGCGGCGGGTGGTGCAGATC  
CTCAACCGAGAGGCGGAGCCTGCGCCC GTGCCGCCAAGAAACCACTGCTGGTGTTCAGCTC  
CAGCGCGTCCGCGAAGCTGCAGGAGATCGCCTTCTCCTGTGGCGATGACGTCCGAGGCGGCT  
ACTCCGTTGCCAAGCCTGCATCACCAAAGTCCGAGGGAGCCGACATTGAACGCTGA

>JL63\_GRMZM2G039934

ATGGCCGCCACCACGGGCACCTCGTCCTCGCCGCCGACGCTCCCGGTCCACGGCGGCCTCCT  
GCTCCTGCTCCCTCTCCTGACCATTACCTCCGCCGCGTCGTCGGCGCCGCTGCCCTCCTCGC  
GCTGCTCTCCCTGAAGTCGTCCCTGCACGACCCGGCCGGCGCACTGCGCGCTTGACGTACG  
CCGCTGCGGCGTCCGCGGGGCGCCACGCGGTGCTGGCGCCGCCGTGGTGC GCGTGGCCGG  
GCGTGTCTGCGACCCGGCCACGGGGGACGTGCGCGGGCTCGACCTCTCCCGCCGCAACCTC  
TCCGGCACCGTCTCCGCCACCGCGGCCAGGCTGCTGGCCCGCACGCTGACGTGCTCAACCT  
CAGCGCGAACGCGTTCGCGGGGGAGTTCCCGCCGTCGGTGTTCCTGCTCCGGCGGCTCCAGT  
CGCTCGACGTGAGCCACA ACTTCTTCAACGGCACGTTCCCGGACGGCGTCGCCGGGCTCGGC  
GGCTCGCTCGCCGCGCTCGACGCCTACAGCAACTGCTTCGTCGGCTCACTGCCGCGCGGCCT  
CGGCGAGCTCCGCCGGCTGCAGAGTCTAACCTCGGCGGCAGCTTCTTCAACGGGACCATCC  
CAGCCGAGATCGGCCAGCTCCGTTGCTGCGGTTCTGACCTCGCCGGGAACGCGTTAACCC  
GGTCCGGTCCCTTCGGAGCTCGGCGGCCTCGCGTCGCTCGAGCAGCTCGAGATCGGATACAA  
TGCATACGACGGCCGCATTCCCACGGAGCTCGGCAACCTGACGCAGCTCCAGTACCTCGACAT  
CGCGGTGCGCAACATGTCCGGCCCCTGCCACCGGAGCTCGGCAAGCTCGCGCGGCTCGAGA  
AGCTCTTCTGTTCAAGAACC GGCTCGCCGGTGCATACCGCCGCAAGTGGTCCCGCCTCCGCG  
CGCTGCAGGCCCTCGACCTGTCTGACAACCTGCTCGCCGGCACCATCCCGGCAGGACTCGGG  
GATCTTGGCAATCTCACAATGCTGAACCTCATGAGCAACTTCTTTCCGGTACAATCCCGAAGG  
CGATCGGCGCGCTGCCGAGCCTCGAGGTGCTGCAGCTCTGGAACA ACTCGCTCACCGGACGG  
CTGCCGGAGTCGCTCGGCGCGAGCGGGCGGCTCGTCCGGGTGGACGTGTGACCAACTCCCT  
GTCCGGCCC GATTCTTCCGGGATGTGCATCGGCAACCGTCTCGCCCGCCTCATCCTCTTCA  
CAACCAGTTCGACTGGACCATCCCAGCGAGCCTGGCCA ACTGCTCGTCGCTCTGCCGAGTCCG  
GCTGGAATCTAACCGCCTGTCTGGCGAGATCCCGGTCCGGTTCGGCGCGATCCGTAATCTGAC  
ATACCTGGACCTGAGCTCCA ACTCACTCACCGGCGGCATTCTGCTGATCTCGTGGCTTCTCCG  
AGCCTCGAGTACATCAACATCTCCGGCAACCCCGTCCGGCGGCGCGCTCCCGAACGTGTGCTGG  
CAGGCGCCGAACCTGCAAGTGTTCGCAGCGAGCAAGTGCGCCCTGGGCGGGCGAGGTCCCGGC  
GTTCCGCGCCGCGGGGTGTTGCAACCTGTACCGGCTGGAGCTGGCAGGGGAACCATCTCACTG  
GTGCCATCCCTAGTGACATCAGCACCTGCAAGCGGCTGGTGGAGCTTGAGGCTGCAGCACAATC  
AGCTCAGCGGCGAGATCCAGCAGAGCTCGCCGCCTTGCCGTGATCACTGAGATCGACCTGT  
CCTGGAACGAGCTCAGCGGCGTCTCCCGCCGGGCTTCGCTAACTGCACCACGTTGGAGACCT  
TCGACGTGTCCTTCAACCATTTGGTGACCGCTGGCTCGCCGTCAGCGTCTGACCCAGGCGCCC  
GTGAGGGGACCGTTCCGGCGCACCGCGGCAATGTGGGTTTCTGCCGTGGCAGTGTCTTGGCG  
GGGATGGTGGCGCTCGTCTGACCGCTCGCTGGCTGCAGTGGCGCGAGGACGGCACTGGCG  
CGCGGGGGGTTGGTAGCAGGGGGCGGCGCAGGTGCACGCCCAACGTGGTCTCGGACCGTG  
GCGGATGACCGCGTTCAGAGGCTCGACTTACC GCGGACGACGTGGCGCGGTGCGTTGAGG  
GGAGCGACGGCATCATTGGCGCCGGGTATCGGGGACGGTGTACCGCGCGAAGATGCCGAAC  
GGGGAGGTCATCGCGGTGAAGAAGCTGTGGCAACCGTCCGGCGCAGAAGGAGGGAGGAGCTCA  
GGCGCCGGAGGAGCCACCAAAGCGGAAGGACGAGGCAGACGCGGACGACGGCAACAGGAGC  
ATGCTCGCCGAGGTGGAGGTGCTGGGTACCTCCGGCACCGCAACATCGTCCGGCTGCTGGG  
GTGGTGCACCGACGGCGAGGCGACGCTGCTGCTCTACGAGTACATGCCGAACGGCAGCCTGG  
ACGAGCTCCTGCACGGCGCCGTGTGCAGGGGCAAGCAGGCGGGGCTGGACTGGGACGCGCG  
CCACCGGATCGCCGTGGGCGTCCGCGCAGGGCATGAGCTACCTTACCACGACTGCGTGCCGG  
CCGTGGCGCACCGCGACCTCAAGCCTAGCAACATCCTGCTCGACGCAGACATGGAGGCGCGC  
GTGGCGGACTTCGGCGTCCGCAAGGCGCTCCAGGGCGCCGCGCCCATGTCCGTCTGCGCCG  
GCTCCTACGGCTACATCGCACAGAGTACACGTACTCTCCAAGTAGACGAGAAAAGCGACGT  
GTACAGCTTCGGCGTGGTGTGCTGCTGGAGATCCTGATCGGCCGGAGGTCCGTGGAGGCGGAGT  
ACGGCGAGGGGAAGCAACATCGTGGACTGGACGAGGCGTAAGGTCCGCCCGGCAACGTGATG

GACGCGGCGGAGTGGGCGGACCAGCAGACCCGCGAGGCGGTGCGGGACGAGATGGCGCTGG  
CGCTGCGGGTGGCTCTGCTCTGCAACCAGCCGGTGCCCGCAGGAGCGGCCGTGATGAGGGAC  
GTCGTGCCATGCTGCAGGAGGTCAGGCGCGGCCGGAAGATACTAGCTCCTGGGATGGCCAA  
GAAGCAGCCAAAGATTAATTAA

>JL64\_GRMZM2G046316

ATGCCACTCCAGGTCCACCCCTCCTCCTGCTCCTCTTGGTCAGCTCGCTTCCCTCCTGCGCCA  
TCTCCTCCGGTTCCTCCTCTTGCGCCGGCCGCGACGACGCGGCCATCGTCGCCGCCGCGTTC  
CGGCACGTGCGCAACTTCCGGGCCCGAGGACGAAAGCATGCCAGCCGGTCAGAGCGCTCCG  
CCTCCCGTGC CGGAACCTCACCGGCGCGGTGTCGTGGGCGGCGCTGGCAAACCTGTCCGCGC  
TCGCCGCGGTTGACCTCTCGGGCAACGCGCTCCAGGGCGCCATCCCGGGCGGGTTCTGGCGC  
GCGCCATCGCTCCGCGCGGTTGACGTCTCCCGCAACCAGCTCGGTGGCGCGCTCCGGGTGGA  
GCCAAACCCGCAGCTCCAGTCGCTCAACGTATCCGGCAACCGCTTACC GGCGTCGACGGGG  
TGGAAGGGCTCTCGGGGCTCGTCGCGCTTGACGTGTCAACGAACAGGATCCGGGCGGTGCCG  
CGGGGTCTGCGGCGTCTGACACGGTTGAAGCGGCTCGACCTGTCCTCGAACGGGATGCGGGG  
GTGGTTCCCGGCGACTTGCCGCCGCTCGGTGGGGTGC GTTCGTTGAACGTCTCGTACAACAA  
GTTCTCCGGCGTGGTGGACACGGGCGCCGTCACGAAGTTCGGCCACTCGGCGTTCGTTACG  
CCGGCAATGCGTCGCTGGTGTCTCGGGCCACTCGACAGAGCCACGGCGGCCACGGCCATCA  
CCTCCTCATGGAAAAAGCAAAAAGAACGGTGGTTCGGCCGGGACGTGACGGAGAGCAAGGC  
GACGAGGAGTAGCAAGAAGAGGAAGCATCTGAGCATCGTGGCGGTGGCGGTGATCTGCGGGG  
TGGTGTCCCTGGCCATGCTGCTCTGCCTGGTTCGGTGC GTGGCGTGCGGCGTCTGAAAGTCC  
AGGCAGAAGGGAGGAAAAGACGACGACGAGAAGAAGCCACAATGGGGCGAGAAGGGCGAGGA  
GGAGAAGGAGGAGGACGTGGTGGTTCGCGGGCGGCCAGGGGTGCATCGGCAGCGCCCGTGGTG  
CTGTTGAGCGGCCGCTGATGCAGCTCACGCTGGCCAACTGGCCGCGGCCACGTCCGGGCTT  
CGGCCGCGAGTCGCAGCTCGCGGAGCGCGGCGGCCGCGAGCGGCGCAGCGTACAGGGCCGTG  
CTCCCGGCGACACGACGTGCTGCTGCGCGTCTGGAGGGCGCCATGGCCGGGCTCGGCG  
AGGACGACAACCCGGCGGCCGCTGCCACCGCATTCCGGGAGCTCGCGCGCCTCCGCCACCCC  
AACATTCTTCGCTCCTTGGCTACTGCATTGCAGGCAAAGAGAAGCTGCTACTGTACGAGTACA  
TGGAGAAGGGCGATCTGCACCGGTGGCTGCACGAGCTGCCAGCGGGTTCGGCCGGACATGGAC  
GACACGGGCAGCGGCACATTTGGGAGGCGGCGGAGGTCAAGCGGTCCATCTCCGACTGGCC  
GACCCGGCACCGCATCGCGCTGGGGGTGCGCCGGGGCCTGGCGTTCCTGCACCAGGGATGG  
GCCGGCGGGTTCGGGGCGCGCGGCGGTCTGTCACGGCCACCTGGTGC CGACCAACGTTCTGC  
TGTGCGACGACCTGGAGCCCCGATCTCAGACTTCGGGCACAACAACGACCCGCCGTCGGCG  
GCGACGCCCGAGGGCGACGTGTACGGGTTTCGGCGTCTGGTGTGGAGCTGATGACGGGGC  
AGGCCGGGTGGGACGAGGCGTCCGTGAGCTGGGCGCGGGGCATCATCCGCGACGGCAAAGG  
GCTGGACATCGTGGACCCTAGGGTGC GGGACGAGGCCGCCGGGGCGGAGGCGGAAGCGGAG  
CGAGAGATGGTGGAGTGCCTGCGGGTGGGGTACCTCTGCACGGCGCACGCGCCGGACAAGC  
GGCCGACAATGCAGCAGGTAGTGGGGTGTCAAGGACATCCGGCCGGCGCCTCCACACCC  
GTCCGGGCAGCTGA

>JL65\_GRMZM2G034155

ATGCGTCTGCCCTTGCCATTGCCATCGCCAAGCCCCATGCGCCGCGCCACCTCCCCCTCCCC  
CTTCCCCTTCTTCCCCTTGTCTTACTCCACCTCCTCTTCGCGGGCTCCTCTGGCTCGCCTTCGTC  
AGAGGTCGCCTTCTTGACGGCCTGGCTCAACACCACGGCCGCGCGCCCGCCGGACTGGTTCG  
CGGCCGATTGTCCCCGTGCAACTGGTCGCACGTCTCCTGCGCCGGCGGGACAGGCGAGACG  
GGCGCCGTCACGTCCGTGCTTCCAGTCCGTGCACCTCGCGGTCCCGCTCCCGGCGGGCCT  
CTGCGCCGCGCTGCCGGGGCTCGTGTGCTTTGTCGTCTCGGATGCCAACCTCACAGGCGGGC  
TCCCCGATGACCTGTGGCGGTGCCGCCGCTCACCGTGCTAGATATCAGCGGCAACGCGCTCA  
CCGGCTCCATCCCGTCATCGCTCGGGAACGCCACGGCGCTCGAGAACTTGGCGCTCAACTCCA  
ACCAGCTCTCCGGGCCATCCCGCCGGAGCTTGC GGCGCTTGCGCCACGCTCAGGAACCTG  
CTCCTCTTCGACAACCGCCTGTCCGGGGAGCTCCCGCCGTCTCTCGGCGACCTGCTCTTGCTC  
GAGTCGTTGCGCGCCGGCGGCAACCATGACCTGGCGGGCTTGATACCCGAGTCTTCTCCAG  
GCTGTCCAGCCTCGTCTGCTCGGCCTCGCCGACACCAAGATCTCCGGCCCGCTCCCGGCGT  
CGCTGGGCCAGCTCCAGAGCCTCCAGACGCTGTCCATTTACACCACGGCGCTCTCCGGCGCCA  
TCCCGCCGGAGCTCGGCAACTGCTCCAACCTCACAGCATCTACCTCTACGAGAACTCGCTGT  
CCGGCCCTCTGCCACCGTCGCTCGGCGCGCTGCCGCGGCTGCAGAAGCTGCTGCTGTGGCAG  
AACGCGCTCACGGGCCCCATCCCGGAGTCTTTCGGCAACCTCACTTCGCTCGTCTCGCTCGAC  
CTCTCCATCAACTCCATCTCCGGCACCATCCCGGCGTCTCGTCTCGGGCGGCTGCCGGCGCTGCA

GGACCTCATGCTCAGCGACAACAACATCACCGGCACCATCCCGCCGTTGCTCGCCAACGCCAC  
GTCGCTGGTGCAGCTGCAGGTGCACACCAACGAGATCTCCGGCCTCATCCCGCCCGAGCTTGG  
TCGCCTCTCTGGCTTGCAGGTGCTCTTCGCCTGGCAGAACCAGCTGGAGGGCGCCATCCAGC  
GACGCTCGCGTCCCTGGCGAACCTCCAGGCGCTCGACCTCTCGCACAACCACCTCACCGGCAT  
CATACCGCCGGGCTCTTCTGCTCCGCAACCTCACGAAGCTGCTGCTCCTGTCCAATGATCTC  
TCCGGGCGCTGCCGCTGGAGATCGGCAAGGCTGCCAGCCTCGTGCCTTGCCTCGGTGG  
CAACCGCATTGCGGGGTGCATCCCCGCGTCCGTGTCTGGCATGAAGAGCATCAACTTCCTCGA  
CCTCGGAAGCAATCGGCTAGCCGGTCCGGTGCCGGCCGAGCTGGGCAACTGCTCGCAGCTCC  
AGATGCTTGACCTGAGTAACAACCTCGCTCACGGGGCCGCTGCCGGTGTGCTCGCCGCGGTG  
CACGGCCTGCAGGAGCTCGACGTCTCGCACAACAGGCTTAACGGCGCTGTACCAGACGCGCTC  
GGCAGGCTGGAGACGCTGAGCAGGCTCGTGCTCAGCGGCAACTCGCTGTCCGGACCGATAACC  
GCCGGCGCTCGGTCAGTGCCGCAACCTGGAGCTCCTCGACCTGAGTGACAACGTGCTCACCG  
GAAACATCCCCGACGAGCTCTGCGGCATCGACGGGCTAGACATCGCGCTGAACTTGAGCCGGA  
ACGCCCTCACCGGGCCGATCCCGGCGAAGATCTCGGAGCTGAGCAAGCTCTCAGTGCTCGAC  
CTCTCGTACAACGCGCTCAACGGAAACCTTGCGCCGCTCGCCGGGCTCGACAACCTCGTCACG  
CTCAACGTGTGCAACAACAACCTTCTCCGGGTACCTCCCGGACACGAAGCTCTTCCGGCAGCTCT  
CGACGTCCTGCCTCGCAGGCAACTCTGGGCTCTGCACCAAAGGCGGGGACGTATGCTTCGTGA  
GCATCGACGCCAACGGTAACCCGGTGACGAGCACAGCCGAAGAGGGCGCAGCGCGTGCACCGC  
CTCAAGATCGCCATCGCGCTGCTGGTGAAGTGCACGGTGGCGATGGTCTCCTCGGCATGATGGG  
CATACTGCGAGCGCGGCGGATGGGCTTTGGGGGGAAGAGCGGCGGCCGAGCAGCGACTCC  
GAGAGCGGCGGCGAGCTGTGCTGGCCGTGGCAGTTCACGCCGTTCCAGAAGCTGAGCTTCTC  
CGTGGACCAGGTGGTGAAGGAGCCTGGTGGACGCCAACATCATCGGCAAGGGCTGCTCCGGCG  
TGGTGTACCGCGTGAGCATCGACACCGGCGAGGTGATCGCCGTGAAGAAGCTGTGGCCTAGC  
ACCCAGACCGCGGCGACGTCCAAGGACGACGGCACGAGCGGGCGCGTCCGGGACTCGTTCTC  
GGCGGAGGTGCGCACGCTGGGCTCCATCCGGCACAAGAACATCGTGCGGTTCTCGGCTGTT  
GCTGGAACAAGAGCACCCGGCTGCTCATGTACGACTACATGGCCAACGGCAGCCTCGGCGCG  
GTGCTCCACGAGCGGCGCGGCGCGGGCGCGCAGCTGGAGTGGGACGTGCGCTACCGCATCG  
TGCTCGGCGCGGCGCAGGGGATCGCGTACCTGCACCACGACTGCGTGCCTCCGATCGTGAC  
CGCGACATCAAGGCCAACAAACATCCTCATAGGCCCTCGACTTCGAGGCATAATTGCCGACTTCG  
GCCTGGCCAAGCTCGTCGAGGACGGCGACTTTGGACGGTGTGTCACACCGTTGCCGGCTCCT  
ATGGCTACATTGCCCTGAGTACGGGTATATGATGAAGATCACAGAGAAGAGCGACGTGTATAG  
CTATGGCGTGGTGGTGTGGAAGTGTGACGGGGAAGCAGCCGATCGACCCGACGATCCCAG  
ACGGCCTGCACGTGGTGGACTGGGTGCGGCGGTGTAGGGACCGCGCCGGCGTGTGCGACCC  
GGCGCTCCGGCGACGGTGCAGTTCGGAGGTGGAGGAGATGCTGCAGGTGATGGGAGTGGCG  
CTGCTGTGCGTGAGCGCGGCGCCGGACGACCCGGCCGACGATGAAGGACGTGGCGGCCATGC  
TCAAGGAGATCCGGCTCGAGCGTGAGGACGTGGCCAACGTGGACGTCCTCCTCAAGGGAGGC  
TCGTGCTCCTCATCATGTTTCATGCCAACGCCGCGGCGATAGCTGACAAGGCCACGTGCTCA  
ACGTCCAGCACGCCGCGGTGCCCGCAGGGTCCGAGCAACAGCTGCAGCAGTAGCAGCTTCTC  
TGCCATCTACTCCTTGTCCAACAAGGCCAAGTCACCCTTTGGCTGA

>JL66\_GRMZM2G114276

ATGCCCGCTCGCGGTGCTTGTTCCTGCTGCTCATGCTGGCGCTGGCGCCGCTCGCGTGCCT  
GACCGCGCCGGCGCCGGCGCCGGTGGCGAGGACAGCCGGGGTGCAGGCGGAGATCGACGC  
GCTGCTCGCGTTCGCGCGGCTGCGCGACCCCTACGGCGCCATGTCCGGGTGGGACGCG  
GCGTCCCCCTCCGCGCCCTGCTCCTGGCGCGGCGTGCCTGCGCGCAGGGCGGCGCGTGC  
TCGAGCTGCAGCTCCCGCGGCTCCGTCTCTCGGGCCCCATCTCGCCAGCGCTCGGCTCGCTG  
CCGTACCTCGAGCGGCTCAGCCTCCGGTCCAACGACCTCTCCGGCGCCATCCCGCCGTGCT  
GGCCCGCTCACCTCCCTGCGCGCCGTCTTCTCCAGTCCAACCTCGCTCTCCGGCCCCATTCC  
CCAGTCTTCTCGCCAACCTCACAGCCTCGACACCTTCGACGTGTCCGGCAACCTCCTGTCC  
GGCCCCGTCCCCGTCTCGCTTCTCCAGCTTGAAGTACCTCGACCTATCCTCCAACGCCTTCT  
CCGGAACCATCCCGTGAACATTAGCGCCTCCACCGCCAGCCTCCAGTTCTTGAACCTGTCTT  
CAACCGACTCCGGGGCACCGTCCCGGCGTGCCTGGGAACTTGCAGGACCTGCACTACCTCTG  
GCTGGACGGGAACCTTCTCGAGGGGACCATCCCGGCCGCGCTGGCAAACCTGCTCGGCGCTGC  
TCCACCTGAGCCTTTCAGGGGAACTCGCTCCGCGGCATCTTGCCGTCTGCGGTGCGCGGATA  
CCACGCTGCAGATTCTCCTGTCGCGGAACAGCTCACCGGCGCCATCCCGGCGGCGGCG  
TTTGGTGTGTCAGGGGAACTCGTCCCTGCGCATTGTGACGCTCGGCGGCAACGAGTTCTCTCAG  
GTGGACGTGCCGGGAGGTCTCGCCGCGGATCTTTCAGGTGGTGGACCTGGGAGGCAACAAGCT  
AGCTGGTCCATTCCCGGCTTGGCTTGTGGGGCGGGGGGACTGACGCTGCTCGACCTCTCGG

GCAATGCGTTACACGGAGAGTTGCCGCCAGCGCTCGGGCAGCTCACTGCGCTGCTGGAGCTG  
CGCCTCGGCGGTAATGCTTTTCGCTGGCGCCGTGCCTGCGGAGATTGGCAGATGCGGCGCACT  
CCAGGTACTIONGATCTCGAGGACAATCACTTCACCGGCGAGGTGCCGTGAGCTCTTGCGGCTCT  
CCCGAGGCTCAGGGAGGTCTATCTTGGTGGGAACACTTTCTCCGGCGAGATTCCGGCGAGCTT  
GGGAATCTGTCTGGCTAGAGGCATTGTCCATACCGAGGAACAGACTCACTGGTGGCCTTTC  
TGGTGAGCTCTCCAGCTGGGGAACCTGACGTTCCCTGGACCTATCAGAGAACAACCTCGCCGG  
TGAGATACTCTGGCCATCGGTAACCTGTTGGCTCTCCAGAGCTTAAATTTGAGCGGCAATGCC  
TTTTCTGGTCACATTCCACGACCATTAGCAACCTCCAGAACCTGCGAGTTCTTGATCTCTCTGG  
TCAGAAGAACCTCTCTGGCAATGTCCCGGCGGAACCTTTTTGGCCTACCGCAGCTGCAGTATGTG  
TCATTTCGAGACAACCTCTCTGGTGTGTTCTGAAGGATTCAGCAGTCTTTGGAGTCTGC  
GCGACCTCAATCTCTCCGGCAATTCATTCACTGGGTCAATACCGGCGACATATGGGTACTTGCC  
GTCACCTCAAGTGCTCTCGGCCTCACACAACCACATTTCTGGGGAGCTGCCACCGGAGCTTGC  
CAATTGTTCCAACCTTACTGTGCTTGAGCTCAGTGGCAACCAGCTGACCGGCTCCATCCCGAGT  
GACCTCTCGCGCCTTGGTGAATTGGAAGAGCTGGACCTCAGTTACAATCAGTTTTAGGCAAGA  
TACCACCAGAGATATCCAATTGCTCATCACTCACCTTCTCAAGCTTGATGACAATCGTATTGGC  
GGAGACATAACCAGCCTCTATTGCCAACCTCTCAAAGCTGCAGACGCTTGACCTGTCGTCCAACA  
ATCTTACCGGCAGCATCCCTGCATCGTTGGCTCAGATTCTGGCCTTGTGTCAATTCAATGTGTCA  
CACAAACGAGCTTTCTGGTGAGATACCGGCAATGCTCGGCTCCCGCTTTGGTTCTGCTTCAGCGT  
ATGCTTCAAACCCAGATTTGTGTGGGCCGCCATTGGAGAGTGAGTGCAGGAGAGCAGCGGCGGC  
GGCAGAGACGGCAGAAGGTGCAGCGCCTGGCTCTGCTAATTGGTGTGGTGGCTGCTGCCGTG  
CTGCTCCTTGCGCTGTTGTGCTGTTGCTGCGTGTTTAGCTTGCTGCGATGGAGGCGTCGGTTCA  
TTGAGAGCCGTGATGGTGTGAAGAAGAGGAGACGCAGCCCGGGACGCGGCAGTGGGTGAGT  
GGCACAAGCACGGAGAACGGTGTGAGCCAGCCGAAGCTGATTATGTTCAACTCAAGGATCACTT  
ATGCCGACACTGTTGAGGCAACCCGCCAGTTTGACGAGGAGAACGTGCTCAGCCGAGGCCGC  
CATGGCCTCGTGTTCAAGGCTTGTACAGTGACGGCACCGTGTGGCGATTCTGCGGCTCCCG  
TCCACGTCTGCGGATGGTGCCGTGGTGAATTGATGAAGGGTCTGTTAGGAAAGAGGCCGAGTCT  
CTCGGGAAGGTGAAGCACAGGAACCTGACTGTGCTCCGTGGCTACTACGCCGGTCTCCGCCG  
GATGTCCGGCTGCTGGTCTACGACTACATGCCCAACGGCAACCTCGCCACGTTGCTGCAGGAA  
GCGTCGCACCAGGACGGGCACATCCTCAACTGGCCAATGAGGCACCTCATCGCGCTGGGCGT  
CTCGCGCGGCTTGCCTTCTGCATCAGTCCGGCGTGTGCACGGCGACGTGAAGCCGCAGA  
ACATCCTCTTCGACGCCGACTTCGAGCCGCACCTGTGCGGACTTCGGCCTGGAGCCGATGGTGG  
TGACCGCGGGTGCCGCGCGGCAGCCGCCGCCGCGTGCACATCAGCTGCGACACCCGTGGG  
CTCGCTCGGGTACGTGCCCCCGACGCGGCCGCGGCCGGCAGGCCACGAGGGAAGGCGAC  
GTGTACAGCTTCGGCATCGTGCTGCTGGAGCTCCTGACGGGCCGGCGCCCCGGCATCTTCGC  
CGGGGAGGAGGAGGACATCGTGAAGTGGGTGAAGCGGCAGCTGCAGCGCGGCGCCGTGGCG  
GAGCTGCTGGAGCCGGGCTGCTGGAGCTGGACCCGGAGTCTCCGAGTGGGAGGAGTTCT  
GCTGGGCATCAAGGTGCGGCTGCTCTGCACCGCGTCCGACCCGCTGGACCGCCCGGCCATGG  
GCGACGTGGTGTTCATGCTGGAGGGTCCGCGTCCGGCCGGACATCCCGTCTCCGCCGAC  
CCCACCTCCAGCCGTCGCCGGCCTGA

>JL67\_GRMZM2G059117

ATGGCCACTGCTACTGCCACCTCCCCTGCTCTCCTCCTACTCCTCCTCTTCTGCTCATTGGCG  
GGGCGCCACCAGCGACCAAGGCTGACATGCCGATGCCGGTGAACGAGGAGGTGCTGGGGCTG  
GTGGTGTTCAGTCCGGCGCTGTCCGACCCGACCAGCGCGCTGGCCACGTGGACGGGGTCGGA  
CGCGACGACGCCCTGCGCCTGGGCGCGCGTGGAGTGCAGCCCGGCCACCTCCCGCGTGCTC  
CGCCTCGCGCTCGACGGGCTCGCGCTGTCCGGCCGCATGCCCGGGACCTCGACCGCCTGCC  
GGCGCTCCAGTACCTCTCCCTCGCCCCGAACAACATCTCCGGCCCCGCTCCCGCCGGGCTCTC  
CCTCCTCGCCTCCCTCCGCTCCCTCGACCTCTCTACAACGCCTTCTCCGGCCCCGCTCCCCGA  
CGACATCGCGCGCCTCGCCTCCCTCCGCTCCCTCGACCTCACCGGCAACGCCTTCTCCGGCCC  
GCTCCCGCCCCGCTTCCCGGAGACGATCCGCTTCTCGTGCTGTCCGGCAACCAGTTCTCCGG  
CCCCGTGCCGGAGGGGCTGGCGTCTGGGAGCCCGCTCCTGCTCCACCTCAACGTGTCCGGCA  
ACCAGCTGTCCGGCTCGCCGGACTTCGCGGGCGCGCTCTGGCCGCTCCAGCGCCTGCGCAGC  
CTCGACCTCTCCCGCAACCAGTTCTCCGGCCCCGTCACCGGCGGCATTGCCAGGCTCCACAAC  
CTCAAGACCCTCATCCTCAGCGGCAACCAGTTCTTCGGAGCCGTCCCGGCGGACATCGGCCTG  
TGCCCGCATCTCAGCGCCATCGACCTCAGCTCCAACGCGTTCGACGGCCACCTCCCTGACTCC  
ATCGCCAGCTCGCCTCGCTGGTCTACCTGTCCGCGTCCGGGAACCAGGCTCTCCGGCGACGT  
CCCCGCTGGCTCGGCAAGCTGGCAGCGGTGCAGCACGTGGATTTATCCGACAACGCGCTCA  
CCGGAGGCTTCCGGACTCGCTCGGCGACCTCAAGGCGCTCAGGTACCTGAGCCTATCCAGG

AACCAGCTCTCGGGCGCCGTCCCGGCTCCATGTCCGGGTGCACCAAGCTCGCCGAGCTGCA  
CCTGAGGGGCAACAACCTCAGCGGCAGCATCCCGGACGCTCTGCTCGACGTGGGGCTCGAGA  
CGCTCGACGTGTCGTGAACGCGCTCTCGGGCGTCCTCCCCTCGGGCTCCACCAGGCTGGCC  
GAGACGCTGCAGTGGCTCGACCTCTCCGGCAACCAGCTCACTGGCGGCATCCCCACCGAGAT  
GTCGCTCTTCTTCAAGCTCCGGTACCTCAACCTGTCCCGCAACGACCTCCGCGCGCCGCTGCC  
GCCGGAGCTCGGCCTGCTCCGCAACCTGACGGTGTCTCGACCTGCGTAGCACTGGGCTGTACG  
GCGCCGTGCCAGCCGACTTCTGCGAGTCCGGTAGCCTCGCCGTGCTCCAGCTCGACGGCAAC  
TCCCTCTCCGGCCCCATCCCCGACAGCATCGGAAACTGTTCTTCCCTGTACCTCCTGAGCTTGG  
GGCACAACGGCTTGACGGGGCCGATCCCGGCGGGCATCTCGGAGCTGAAGAAGCTGGAGATC  
CTGCGGCTGGAGTACAACAAGCTGAGCGGCGAGATCCCGCAGCAGCTGGGCGCGCTGGAGAA  
CCTGCTGGCCGTGAACATCTCGCACAAACCGGCTGGTGGGGCGGCTGCCGGCGTGGGGCGTGT  
TCCAGAGCCTGGACGCGAGCGCGCTGGAGGGCAACCTGGGCATCTGCAGCCCGCTGGTGACG  
GAGCCGTGCAGGATGAACGTGGCCAAGCCGCTGGTGTGACCCCAACGAGTATACGCAGGG  
CGGCGGCGGCGGCGACAACAACCTGGAGACGGGCGGCGGCGGTGGTGTAGAGGCGCCGAGG  
AAGCGGCGGTTCTGATGAGCGTGTCCGCCATGGTGGCCATCTTCGCGGCGGTTCGCGATCGT  
GCTCGGCGTCATCGTGATCACGCTGCTCAGCGTGTCCGCCCGGCGGAGGGTTCGAGGCTGCGG  
GTGTTGGAGGCCCTGGCCACGACCGGAAGGAGGTGGACGAGAGCATCGTACCACCAGCTCG  
ACGACGACGACCAAGTCATCGTCTCGCCGCCGCCCGGGGCAAGGTAAGGAAAAGCTCGC  
CACCGGCAAGATGGTGACGTTCCGGCCCGGAGCAGCCTCCGGTTCGGAGGACCTCGTGGCG  
GGCGCCGACGCGCTGCTGAGCAAGGCAACAGAGATCGGGCGCGGCGGCTTGGGCACGGTGT  
ACCGCGCGGCGGTGGGCGACGGGCGGGTGGTGGCGGTGAAGAAGCTGGCGGCGGCTCACCT  
GGTGCGGTTCGCGCGAGGAGTTCGAGCGGGAGGTGCGCGTGTGGAAAGGCGCGGCACCCA  
AACCTGCTGGCGCTGAGGGGCTACTACTGGACGCCGACGCTGCAGCTGCTGATCACGGACTAC  
GCGGCGCACGGCAGCCTGGAGGCGCGGCTGCACGGCGGCGGAGAGGCGGCGCCGATGACG  
TGGGAGGAGCGGTTCCGCGTGGTGTCCGGGACGGCCCGGGCGCTGGCGCACCTGCACCAGG  
CGTTCGGCCGGCGCTGGTCCACTACAACGTGAAGCCGAGCAACATCTTGCTGGCGGACGCG  
GAGTGCAACCCGGCGGTGGGCGACTTCGGGCTGGCGCGGCTGCTGCATGGCAGTGGCAGTG  
GCAGGCAGGTGGCGATGGCGGGCAGCCGGTTCGGCAGGGCGGCGGCGGCGGGATGGGGT  
ACGTGGCCCCGGAGCTGGCGTGCCAGAGCCTGCGGGCGAACGACAAGTGCAGCTGTACGG  
GGTGGGCGTGTGATCCTGGAGCTGGTGACGGGGCGGCGCGGTTGGAGTACGGGGACGAC  
GACGTGGTGGTGTGACTGACCAGGTGCGCGCGCTGCTGGAGCACGGCAACGCGCTGGAGTG  
CGTGGACCCGGGCATGGGCGGACGCGGGCACGTCCCGGAGGAGGAGGTGGTGCCGGTGTG  
AAGCTGGGCATGGTGTGCGCGTCCGAGATCCCGTCCAACCGGCCGTCCATGGCGGAGGTGGT  
CCAGATCCTGCAGGTCATCAAGGCGCCCGTGGGCGGCGGTGGCAGAATGCAAGCCTCCTTCT  
GA

>JL68\_GRMZM2G089819

ATGCCGCGCGCCACGGAGGCTTCCACCGCGCCTCGCCACCGCCGCTGTGGCATCGCCG  
CGCGTCCACGCTCCTGTTCTCCTCCTGCTGCTCTCCGCTCCTCCTACCATCGCCAGCACCAC  
CGCCACCACGCCACGGGCGACGGCGTGGTGTGATCAGCCAGGCCGACTACCAGGGCCTGCAAGC  
CATCAAGCACGACCTCTCGGACCCCTACGGCTTCTGCGCTCCTGGAACGACAGCGGGCTCGC  
CGCCTGCTCGGGCGCGTGGGCGGGCGTCAAGTGCCTCCTAGGCAGCGTTCGTGGCCATCACGC  
TCCCCTGGCGCGGCCCTCGGCGGCATGCTCTCCGCGCGCGGCCCTCGGCCAGCTCGTCCGCCTC  
CGCCGCCTCAGCCTCCACGACAACGCCATCGCGGGCCCGTCCCGTCCCTCGCTCGGCTTCT  
GCCGGACCTCCGCGGCGTCTACCTCTTCAACAACCGCTTCTCCGGGACCCTCCCCGCCTCCAT  
CGGAGGGTGGTGTGCGCCTGCAGGCCTTCGACGCCAGCAACAACCGCCTCACGGGCGCGGTCC  
CCGCCGCGTCCGCAACTCCACCAGGCTCATGCGCCTCAACCTCAGCCGGAACGCGCTCTCC  
GACGCCGTACCCGTGCAGGTGCTGCGCTCCGCCTCGCTCATGTTCTCGACCTCTCCTACAAC  
AACCTCTCGGGCCCCATCCCCGACGCCTTCGCGGCTCCTACAGCTCGCCTTCGAAGCTGCGC  
CTCAACAGGGACGCCATCACCGGGAGCTACCAGCTCGTCTTCTCAGCCTCGCGCACAACCTCC  
CTCGACGGGCCCATCCCGGAGTCCCTCACCAAGCTCACCAAGCTGCAGCAGCTCCACCTCTCC  
GCCAACAGCCTCAACGGCACCATCCCGGCGCAGCTCGCCGCGCTACCGGACCTCAAGGCGCT  
GGACCTCTCCGGGAACGCGCTGGCCGGCGAGATCCCGCCCGGGCTCGACAACCTCACCGCCA  
CGTCCAGTCTTCAACGTGTCTACAACAACCTCTCCGGCGCGGCGCCGCGCTCGTGGCGC  
GCAAGTTCGGGGAGCCCGCGTTCACCGGGAACGTCTCCTCTGCGGCTACTCTGCTTCCACGC  
CCTGCCCGGCGTCCCGTCCCGCGCGCGGCGTCCCGCGCGCAGGAGCCGCGCGCGGAGG  
CCGCAAGTTCAGCAGGAAGGCGCTCGTGTCTCATCGTCCCGGGGTGCTCGTCCGGCGTCTCG  
TCCTGCTGCTCCTGCTGCTCCTGCTCTGTTCTGAGCAGGAACAAGAGGTCTCCAGCGG

TACTGCTGGAACACGGAGCGGGAAGCAGGCGGCCAAGGAGACCGGTGGTGTGCTGGCGCCGCC  
GCCGCGGCGGCCGGGCGTGGCGAGAAGCCCGGTCCGCGCGGCCGGAAGTGGAGTCCGGT  
GGCGATGTGGGCGGCAAGCTGGTGCACCTTTGATGGGCCGCTGGCGTTCACGGCCGACGACCT  
GCTTTGCGCCACTGCCGAGATCATGGGGAAGAGCACCTACGGCACGGTGTACAAGGCCACGCT  
GGAGGACGGCAGCCTGGTGGCCGTCAAGCGGCTGCGGGAGAAGATCACCAAGGGGCACAAG  
GAGTTCGAGGCCGAGGCGGCGGTGCTGGGACGGATTGCGCCACCCCAACCTGCTGGCGCTCAG  
GGCATACTACCTGGGACCCAAAGGGGAGAAGCTACTCGTCTTCGATTACATGCCCAACGGCAG  
CCTCCACTCGTTCTTGCACGCTCGCGCTCCCAACACGCCGGTGGACTGGGCGACGCGGATGAC  
GATCGCCAAGGGCACGGCGCGTGGCTTGGCCTACCTCCACGACGACATGAGCATCGTGCACG  
GCAACCTGACGGCCAGCAACGTGCTCCTGGACGAGCAGCACAGCCCCAGGATCTCCGACTTCG  
GGCTGTGCGGGCTGATGACGACGGCGGCAAACCTCGAACGTGCTGGCGGGCGGCCGGGCGCGCT  
GGGGTACCGCGCGCCGGAGCTGTCGAAGCTGAAGAAGGCGAGCGGCAAGACGGACGTGTACA  
GCCTAGGCGTCATCATCCTGGAGCTGCTGACGGGCAAGTCCCCCGCGGACAGCACCAACGGC  
ATGGACCTGCCGCAAGTGGGTGGCGTCCATCGTGAAGGAGGAGTGGACCAGCGAGGTGTTTCA  
CCTGGAGCTGGTGCAGCGACGCCGCGCGGGGACGGCCGCGGACGAGCAGCTCATGGACACG  
CTGAAGCTCGCGCTGCACTGCGTGCACCCGGCGCCGGCGGTGAGGCCGAGGGCGCACGAGG  
TGCTGCGGCAGCTCGAGCAGATCAGGCCTGGTGGCAGCGAGGGCGGCGCTGGGCCAAGCGA  
AGAAGGTGGTGGTGGCGCCGCGCCGCCCATGTGCCGGCGGCTTCTGCTTCTGCGGGAGACG  
ACGACGAGTAG

>JL69\_GRMZM2G344857

ATGGAGAGGAGCTGTTTTGACCCGCGTGTGCGCACAGGGCTAACTCCAAAGCTCAGGTCAACGAG  
CTGCTGCTGGTCTGGAGGACAGCAACTGATGCCTTTGCCGTGCCATGGAAAGAATTGAAAAGGT  
ATCAACCATCTGCTGGCCTGGAAAAAGCTTGGAGCAGGAAGAGAGAAATGGTGGCATGGCAAT  
ATGGCATGCATTCCCATGCGCAGTGCACAACACAATGCCTGGACTGGATTCAATTCAACGGCCG  
AGGCGCTGCCTCCGCTTCCCTCAAATGTTGCGCTCCCGAGCTCTCCTCGGCAGCCTCCCACC  
CCCGAGTCGCCCCGACAACCTCCTCCAGCCTCCAACCACCGAGAGCGTAGAACTCGTAATCCA  
AGGCCAGCGCGCGCACGCCATTGCCTCGCCCCGTCCCGCTCCGGCGCCCCCCCCACCGCCAGC  
ATGCACAGGCTCGCCCCGCCCGGTGCTGCTGAGACGACGTACCTATACTATACACATACACA  
CGGACACACCAACGACGCCAACGTGGCGACGTCGGCGAGGAAGATGAGCCAGCTCCCCGCC  
CCGGCCAGCCGGCTGTGGGAAGCGAGCATCCGCAAGCTCCAGACCATCCGCCGCGCGACGAC  
AGCCACAGGGCCCCGCGGCCGACGGCGCCGATGGCGGGGCGGCCCTCACGCCAGTCTCCTC  
TCCATCAATTCTCCTCCGCGTCCAGCACTATCTACCAGTACCACCACGAGGACGGCGAGGACA  
GCGACACGAGCACCAGTGGCGGCAACGATTCGGAAGCCGGCGAGGACGAGGACGCCGGCGA  
GCCACGCACGCGGAGCAGCTGCTGCCAGCGGGGACTTCTACCAGGGCGACCTGCGCGGG  
GACCAGCCGCACGGCGCGGGCAAGTTCTCTGGACCGACGGCAGCATGTACGAGGGCTCCTG  
GCGCCGCGGCCGCGCGTCCGGCCGCGGCAAGTTCTCATGGACCTCGGGGGCCACCTACGAG  
GGCGACTTCGCCGGCGGGTACATGCACGGCCAGGGCACCTACATCGGCGAGTTCGGGGACAC  
CTTCGCGGGGCTCTGGGCCAACAACCTCCGCCACGGCCGGGGCACGCAGGCGTACGCCAACG  
GCGACGTGTACGACGGCCACTGGCGCGACGGCCTGCAGGACGGCCACGGGCGCTACATCTGG  
CGCCACGGCCACGAGTACATCGGCACCTGGAGGGCCGGCGACATGCACGGCTGCGGGACCGT  
GATCTGGGCGGACGGCGACCGCTACGACGGCGCCTGGGAGGACACCAGGCCCAAGGGCCAG  
GGCACGTTCCGCTGGGCCGACGGCGGGATGTACATCGGCACCTGGTGCAGGAGGCGGGCG  
CCGTGCACGCCGACGGCGTCTACTACCCGCGTCCGGTGGCCCCGCGGTGCCCGTGCCCGC  
GAGCCCTGCGACCCCATCACGGCGCTGCTCCAGGAGCTAGAGGTGTGCGAGGGCAAGACGGC  
GTCGCTCATGCCGTGCGAGAAGGTCTCACGTGGCCCCGGCGTGGAGGCCGTGCGAGAAGAAGC  
CGGTGTGGCGCCCCGCCAAGGTTAGCCTTGACCAAGGCAGGAGGTCCAGCGTGAGCAGGAGG  
AGCAGCGCGTGGACCTGGACATGCTGCAGCCGGCCGCCGCGGAGGGTGGCGAGACCG  
AGGAGGTGCGCGCGGACAGGTGCTGCCTGCGGACGTGCTGCTGATGCGCACGCCGCCGAG  
GCCGGCAAGAAGCAGGGGGAGACCATCTCAAGGGGCACAGGAACCTACGAGCTCATGCTCA  
ACCTGCAGCTTGGCATCAGGCACGCTGTTGGTAGGCAGTCAGCGCCAAATACGCTGGATCTCA  
AGTCATCGGCATTTCGATCCAAAAGAGAAGATATGGACAAGGTTTTCTCCCGAAGGATCAAAGCA  
TACTCCTCCTCACCAGTCTGCGATTTCCGGTGGAAAGACTACTGCCCCCTGGTTTTTCAGGACT  
CTGCGCAAGCTCTTCGACGTGATCCAGCAGACTACATGATCTCCATTTGCGGGGACGAGGCG  
CTCCGGGAACTGTCGTCTCCTGGTAAGAGCGGGAGCTTCTTCTACCTCACGAACGATGACAAGT  
ACATGATCAAACGATGAAGAAGGCAGAGGTTAAAGTGCTCCTTAGGATGCTTCCAGCCTACTA  
CAAACACGTCCGCTTTTTTCGAAAACACTCTGATCACTAAATTCTTCGGCCTGCACTGCGTCAACG  
TCAAGCTTACAGGAGCTATCCAGAAAAAGGTCCGGTTTTGTTATAATGGGGAACCTTTTTCTGCTCC

AGCTACGCGATCCACAGGCGCTTCGACCTGAAAGGGTCCTCGCATGGTCGCATGACTGACAAA  
CCCATCGATCAGATCAGCGAGCACACAACGTTGAAGGATCTCGATCTTAATTTTCATCTTCCGGCT  
GCCAGGGACCTGGTTTGAGGAATTCTGCAGGCCAAGTGGACAAAGACTGCGAATTAAGTGGAGGC  
GGAGAGGATCATGGATTATAGTCTTTTGGTCCGTATTCACTTCAAGGACAGATGCAAAGACAGC  
AGCAATGGTGACAATGGGACGTCACAGAATGCTGAAGATTCTGAAGAAAACAGGTAA

>JL70\_GRMZM2G087243

ATGAGCTTTGGGAGCTGTCCGGCCGTGGCCGGGGGCGCGACGGCAGAGGAGCTGCTTGAACG  
GGCGCGGGGGCTGGTGCCACCCGCCCTGGCCGCTGCGCGCGCGGCCACTGGCTTCGGTGGG  
CGGTGGAAGGCTATCGCAGCGAGGCTGGGGAGGCTGCCGCAGTGCCTGTCCGACCTGTCTAG  
CCACCCCTGCTTCTCCAAGAACTCGCTCTGTCCGGAGCTGTTGCAGTCGGTGGCTGCAACGCT  
AGCGGAGGCCCGCAGCTCGGTGCGCGCTGCCACGAGCCTCCGAAGGCGGGGAAGCTGCAG  
ATGCAGAGCGACCTCGACGCGCTGGCCGGGAAGCTGGATCTCAACCTCAGGGATTGCTCTCTT  
CTTGTCAAGACTGGTGTGTTGTCTGACGCGACGGTTCCCGCGGCCCGGCTGAGACAGCGTGC  
GCTGCTGGCGCACAGGTGGACGTGCGGGAGCTGCTTGCCAGGCTGCAGATTGGGCACGCAGA  
GGCGAAGCACCGGGCTGTGGATGGCCTGCTCGATGCTCTGCGCGAGGACGAGAAGAGCGTGC  
TGTCGGCGCTCGGCCGTGGCAACGTGGCCGCACTCGTGCAGCTGCTCACGGCGACGACACCC  
AAGGTTAGGGAGAAGGCCGCCACTGTTTTGTGCTTGCTCGCCGAGTCTGGCAGCTGCGAGGGC  
TACTGGTGTGAGAAGGCCGCGCTGCCACCGCTCATCCGGCTGGCTGAGTCCGGTAGCCTTGTT  
GGGCGGGAGAAGGCCGTATCACGCTGCAGCGGCTGTCCATGTCGGCCGACATTGCCCGTGC  
GATCGTCGGCCACAGCGGCTTCCGCGCTCTCATCGACATGTGCCAGACCGGGGACTCGATCAC  
ACAGTCCGCCGCGTCCGGAGCGCTCAAGAACATCTCTGCGGTGCCAGAAGTCCGGCAAGCGC  
TGGCCGAGGAAGGCGTGGTGCAGTCATGATCAACATCCTCGACTCCGGCGTCTGTTCTCGGCT  
CCAAGGAGTACGCCGCGGAGTGCCTGCAGAACCTCACGTCAAGCAACGACAACCTGCGGCGC  
GCCGTCTGTCCGAGGGCGGCCTCCGTAGCCTGCTCGCCTACCTCGACGGGCCACTGCCGCA  
GGAGCCACCGTGGCCGCGCTCCGGAACCTGGTACCCTTGTCCACCTGACAGCCTGGTGT  
CACTTTGCGTGTCTCCCGCGCCTCGCACACGTGCTCCGCGACGGTTCGGTGGGTGCCAGCAG  
GCTGCCGCGGGCACCATCTGCAAGGTCTCCGGCAGCATGGACATGAAGCGGCTGGTGGGCGA  
GCACGGGTGCGTCTGCTCCTGGTGCGCCTGCTGGAGGCCAAGTCGAACGGCGCTCGCGAGG  
CCGCGGCGCAGGCGGTGGCGAGCCTGATGGGGTGCCCGCGAACGCGAGGGACGTCAAGAA  
GGACGAGAAGAGCGTGCCCAACCTGGTGCAGCTGCTGGACCCGAGCCCCAGAACACGGCCA  
AGAAGTACGCCATCTCCTGCCTGCTGGCGCTTTCGGCGAGCAAGCGGTGCAAGAAGCTGATGG  
TCTCTCACGGCGCCATCGGGTACCTGAAGAAGCTCTCGGAGAAGGACGTGGCCGGCGCGAGG  
AAGCTGCTCGAGAAGCTGGACCGCGGTAGGCTTCGCAGCCTGTTACGACAGGAAGTAG

>JL71\_GRMZM2G133716

ATGGCGGCGGGCGGACGGGGACGCCTTGATCGCGGCGTTTTCGGGTGTCCAAGGGCGGCATCGT  
GCTCAAGCACATTTTCTCAACGCACCACCGCCGGAGGCGATGTGCGGGTCCGGCGGAAGAG  
AAGTGGAGAGTGATGAGGAGGACCCGCGGTGATGGTGGTTCGGCACCCCGACTGCCACGTG  
CTCGTCGACCACCCAGCGTCAGCCGCTTCCACCTCGAGCTACGGTGGCCGACGTCGACAGAGT  
CTCATCACCGTACCGACCTCCACTCCGTGCACGGGACATGGGTTTTCGGGGCGACGGATCCCA  
CCCAACACGCCAGTGGATCTCGCTACCGGTGACACGCTGCGGCTCGGGGCGCTCTAAGAGGGA  
GTATAAGCTGCTCTGGCTGTGCTTTCGTGAGGCATTTGAGATGGACGATCTGATGTATATGCCA  
TCGCTGCCTGAGGAGGACAAAGAGGAGCCATATGTTAAGGAACCAAGCAGCAAGTTATTGCCT  
GGGCACAGGGATTCAAGTGAACATGGAGACCCATCAGGATACAAGTGAACAAATTGTGTCTGAAG  
ACATTGCATTTCCAGCCAAAGTGGCCCCCTCAGCACCTCATTGTCTGAGTTCCTTCAACCTTTT  
TTTGTGGAAGAGCATTCACTTTCCCAATTTTCATGAGAAAAGAAACGGAGTGACAGAGGAAAAGTT  
GGTCGACAAGAATCAAATTTGAGAATCTTTGGTTCGTTGATCATAACAGGAAATGCCAGGCACAC  
TGACAAATGCTGGAAAATCAATCCAGTCAGGCGAGCAGGAGGATGCCTCAAACAAAGTGTCCAA  
GAGGTCCAAGTTGAAGTCAAGTCAATCACTTCGTGTTGACACAGGCAGGAGCAGCGAGAGAAG  
CAGCACTCTGAGCCATAGCTTTTCAAGAAGGGAGACCAAAATGATATTGTTGTATGTTCTCAGAGCT  
GTGGGACAGAATGTGCGGTATGTATAGCTTTATTTGGTATTTCTGAAATTGAAAAGGCTGAAGAA  
AAGGAAGAGTTGATTGCTGAAGATAACGTTGACATGAATCCCCCGGCCAGCATGATCATGGAGG  
GAAATATGAACGAGAGAAAACCTGATAATTATATCCACAAAGATCCAATTGGTGCAAAGCTGCAG  
AAGAACTAGGCTTATTAGATTCTGCTCTCCCTTTGCATTTCAAAGATGATGTGTTCCGCCGACAA  
GGAAATTCACAATGGAATGTTGCTAGTGTTACATACAGAATCTGAGCTTCTTTCAGAATATCTTAT  
AATACCAGAAGTGAAGCACGATGACTTGAACCATCTTAAGTGGAGGAAGGTCTCTCAAAAAGC  
GAGAATATAAACCCAAATAAGATTACTGAGGGCCCTGGGAACTGTCAGCTCGAAGGGACCATTC

GTGGGAATCTATTTGACAATTTGGATACTGATGGAATTGAAGAAGGTGAAGAGATCTGCCCACT  
GGACAAGGATGAAATCACCCCAATGGATCAGGTAACATAATAATGGAGAGGAGCAATATAGTT  
TTAAAGCCTACCATTTCCCAACAGTTGATGGATTCTATTTCCCCTCTCAATTTAGATCATGGCGAC  
TTTTCTGAAAATGAGAACTCCATGCTGAACACTGGAGATCAGATGAAATTAATGAACCTGTCTC  
TGAGAATCTTAACCCATTAATTCCAACACTGATGAAAAATATCTGAAGAGCCAAACGGAGGAGTGTA  
TGCCCATTTTCATATCTGGAATTCAAAGATGATATCCTTCTGGATAGGGAAAACACTCAGTGCTGGCT  
CCGAGAAAGTACGAGGCTATGTCCCCTGTGAGGCAGGAAAATCTGTTCTCAGACAAAGAGAAC  
GTGACTCCTGCCTCTAAGGTGAAGACCGTTGTTAGGGGAGTTCTTGGTACAAGGATGGATAATT  
CAGTGTCAGCAGCAAATGCTTCAAATAAGAATAAAGTTCTTGGGTCAAGGGTGCATAATTCAGTG  
TCAACAGAGAATAGCTCAAATAAGAAGCAATGTGAATTATCATCGAAGTCCAAAAAAGTCCACAC  
AGTAGATTTTGTATGTTTTCTATTCCGATAAGGAGAACTTGACTCCTATATCTTCAGGAGGCATGA  
AAGCAAGGAAGTGTTTTCCCAAGGACCTCTCAGTCGACTTAGACCAAGATCAGGAAGCATTCTG  
CTCAGACAAGGAGAACTTGACACCCTATCTTCTGCAGCTCGGAAAACAAGGGACATGTCTGGA  
AACCTTACACGAGTTGAAAGTGCGGTCAAAAGAAAAGGGTTGTTGGTAGGCTCCCCTTCCAGA  
CTCTTGTGTCAAATTCTCCTTTGAGACCTGCTAGCTCGCATGATTGTACCTGTGCTGTTGCTAGA  
CCAGCTGGCGTTGCTGCTGGTGAAGTGGCGATCAAGTTAGAAGATAAATTGAACGATCTCTCAT  
GTAATGGCCACGAATCAGGTAGTGCTGGAGAAGGCATGAAAACCTGGACCATGGTGGCTAATA  
CAGACAGTCTTCTTGATGACGAGTCTAGGAAGGCTATTATGCTGCTAAAAGGCTTAAAAGGAACT  
CGCCTGTTTCATACCAAGGATTGTGATCAGGGAGTTGGATTCCATGAAGCAGCGGGAGGGCCTG  
TTCAGACGGTCAACGAAGGCGACCTCCATCCTGCAATGGATCGAGGAGTGCATGGCAAGGGAG  
AGCTGGTGGATCCACGTCCAGAGCTCGGCCGACATGTTCCCGGTAGCACCAACCCCGCCCGC  
GACCCCTTCAGCGCAGCGCATCGACGAGGAGATCGAGATCAGCTCCGGCTCCTTCAACCCGAT  
GATGGCGTTGTTCCGCCCTCGAAGCTCCGCCGCGCTCGCGGATATGATATCTCCAGACCCGA  
GGACCGCGTCCCTCGACTGCGCCCTCCTCGTCAGTAGGGTCCGGAGCAACGAGAAGGTCGTGG  
TGCTGTCAAACAGCGTCACGCTCAAGATCAAAGCCATGGCAGAGGGCCTGCCATGCGAGGGAG  
CCAAGGAGTTCGCGGAGTCCCTCGTGGACCCGTCTCCAGGCGGTTTCATGTGGGCGGCCAGC  
GCCCCACGGGGGTCCGCCCTGGTCTGCTGGACGCGTCCGCGCTGGCGGAGAACTACTACAA  
CAGCCGCCACCACGCTATGAAGCGGAGGGTTCTGGTGGCGGCGAGGCCCTCCGAGTCCGAGG  
CCGCCAAGGGCCTGAAGCTGATCCTGCGTCACAATTCCTGTACGCGCAGGCCACGGACGCC  
GTCAACAAGACGCCGCTGGTATCGCTGGCCGCGGTGTGA

>JL72\_GRMZM2G469304

ATGTTCCAGTCCTCGGTACTCCAGTCCAGACATGAGGATCTGTATGGTGCAGCACCATCAGGAT  
TCAGGACAGTAGTGCGGCTAGTGCCTGTGGCGACCTTGCATTTGCCACTGCGAGTACCGGTCC  
AAGTTCTTGAAGCGATTGAATGATCAATTCGTTCATGCGCCGTGCTCTTGAGAAAGCTCTAGGT  
TACAAGCCTTGTGCTATCCATGCATCAAGTGAGAACTGCATTCCAAAGCCGACTGAGGAGCTAA  
TAAAGGAGATTGCAGTTCTCGAGCTAGAGGTCATATGCTTGGAGCAACATCTCCTAACACTATA  
AGAAAGGCATTTGAGCAACAATTTTCCCCTGCAAGTTCTGCTTGTGACATGGAGAGCAACAAGC  
AGCCAGCAAGGTCCTTTTCAGGCATACTCTCTGAAGCTCCAGAGCTGAGCTTCTCGACCCCAAG  
GAAGCATCATCAGCTAAACCAGTCCAGTCCAATGGTCCCTGGCACGCAAGTCCACGCCCTACAGCT  
TCTACAAGCGAGACTAGCAATGAGAAGATCAATATCGGACGCAGCCATTCCTCGCTCCTGCACC  
GCTCCGTTAGGGTATCTCCGTCCGCCAAACAATCTCGCTAGAGCTCTGAAACCATGCCATACTTC  
GCCTCTATCTTTTGTGAGGAAGGGAAATGCATGGATCCTGGCGTGGTGAAGTTTGGCAGACATC  
TTGGGGACCAGGGTCCGCGGACCATGTTCCCAACGCCGAACAAGATATCCGAGGACATGATC  
AAATGCATTACGGCCGTATACATGAGGCTGAGAGACGTCGCCGCGTGCAGCACGCCTTCTTC  
CCCTCACCGTGCTCATCCTTTTCTTCGGCGAGCGGGCTGTCTTCAAATACACCGCGGACATAT  
GGAGCCCCAGGTGCAGGAAAGAGAGCTTCGTTGAGGAGTGGCAGGACAACGGGTTAGGCAAC  
GGTGAATCTAGGGAGCTGGCCCTGCCATATGATTCTGTGGTAGAGGTGTCTGCTCTTTGCAAAG  
GTGATCAGAGGTCCGCTGACGTGAAGGATATGCTGCGCAAATACATGTCACTTGTGCAGCTTCT  
CGAAAGCGTTGATCTCAGCGGGATGAAACATGAAGAGAAGCTCGCTTTCTGGATCAACGTGCAT  
AATGCGATGATGATGCATGCCATATAGAGTACGGGATCCACAGAGTAACAGCAAAGGATAC  
TGCTTACCAAGGTGTCGTACATCATTAGTGGCCAAAGAGTGAACGCGGAGCTGATAGAGTACCA  
GATCCTGTGCTGCCGAGCGCACTCTTCTGGACAGTGGCTTCGGCTGCTGCTATAACCCGAAATG  
GAAGTCCAGGGACAAGGACGAGCTGCAAGGCTTCGCCGTGGACCGCCCCGAGCCGCTGGTGC  
ACTTCGCACTGTCTCCGGTAGCTACTCGGATCCAGTGGTGCAGGCTGTACAGCCCCAAGAGCG  
TGTTCCAGCAGCTGGAGGCGGCGAAGGAGGAGTACGTCCGCGCCAACGTGGGCGTCCGCGG  
GCGGGGGCAGCACAAAGATCATCCTCCCAAGGCCCTGGAGCTGTACGCGAGGGACGCCGGGC  
TGGGCGCGCAGGAGGTGGTGGCCGCGGTTCGAGTGCCACCTGCCCGAGGGCCTCCGGGACGC



CGTGCGCCGGAGCCAGCAGCAGGCCGGCCGGGCGCGCGCCGTGGAGTGGAAGCCCCACAAC  
CTGGCGTTCGGTACCTGCTGGCCAAGGAGCTGGTTCGGCGGGTCCCCCGCGTGCAGCCGGCC  
GCTGGAGCCGGTCAGTGCGCCGCTGCGGGCTGGTCCGTGA

>JL73\_GRMZM2G002280

ATGGCGTCCAGAGATGCGGGCGCCAGCCCCAGATCCGCGCCGCATCGCCCTGGAGCGGTGGC  
GCCAAGGACGGCGCCGACCTGCTCAGCCCGCGGTTCCGTTACGCCCGCGCTGGCCGGGT  
GGGACGAGGAGTCCGTCTTCTCGCCGCGATGGTCGTCGAGGACACTCCCGTCCGCGAGTCC  
CGTCGCAAGAGGGCGGGCCTCCACCTCCTCCGCCGGCGGCAGCGCCGGATCCAGCACCAGGAA  
GATGAGGCCGCGTAGGCAGTCTCCGGCCAAGATCCCGCCGGTGGTTCTCGCGCTCGACGATG  
ACGACGACGACGACGCGGCAGATGGCAAATCGATAGTGAATGCTGCCACCAAGGAGGAAGAGA  
AAGTTGTCGTTGTGGGCGACAAGGAGGCGTCCGGATCTGGCGACAAGGCGGGCGTCCGGATCT  
GGCGACAAGGCGGTGGCCACGGGAAACCTGCCGTGCATGGATCGCCTCCGGGAGGAGCTCTC  
TTGCGCTATTTGCTGGAGATCTGCTTTGAGCCGACCACCACGTCTTGTGGGCACAGCTTCTGC  
ATGAAATGCTTAATACATGCTGCATCCAAGTGTGGAAAACGGTGTCCAAAATGCAGGCAATTCAT  
CAGCAACTCAAGATCGTGCACCATCAACACAGTGTCTGGAACACCATTAGCTGTTGTTTCCC  
GGTGAAGTTGAGGCAAGAAAGAATTGACCTCACCATGCGATAAGGACGCGAGCCGCGAGCCCA  
CTCAGAGCTAATAGGCTATCACAAGGTGGCAATGGTATGAGAACTAGAAGTAGGAGCAGGAGCA  
GCAGCACCGAAGCTAGAACAAGAAGCAGCTACAGGAGCTTCATGGAACCCGGCAGTACAACAA  
GCACCAACACTGGTGCGAACCTCATCAGCGCACAAGTCAACACAAGAAGCAGGAGGGGCTTCG  
TCCAGGCCTCGCAGCTGCTGTTGCCTAGGAGGAGCGCAGTAAGGTTGGACCAATCCGAAGATG  
CTGCGTTGGCTTACAGGTTGCAACAGGAGGAGTTCATGAATGCCTTTGAGGAGCCTGAGCAGG  
AGAGGCAGCAGCCACGGAACGCCGTGTCCACAGCAGGACACTCTGAGAGCCATCGCCTCC  
CGAGCCGTCCGCCTCCGTGCTCGAGGCTGGCATGTTAA

>JL74\_GRMZM2G462623

ATGGCCACCGCCCACCGGCTGAATACCTCCACTGCTCCACACGTCCCTGTGCCGCCGTATCTT  
GGTGCCTCTTGCTCCTAGGTAACATACATCTCTGTCCCTCCCTAGGAGACCGAGACAGCACCG  
TAATGGCGTCCCCCTGCGGCGATGCTGCGGGCGGACGCCGAGCTCACCAGCCTGCGCATCAGC  
GAAGGAGCTGGGATCCCTCCGCTTCCCGGACGGCGAAGCGTCGGCGGCAATGCAGCTGAGGG  
AGAAGAGGAGGGTGATAAGAACAAGAAGGCGAGGAAGGGGAAGGCTGGTACGCAGCGGATCG  
CCGGGTGGGGGCTCCGCGAGTTCAGCAAGATAGTTTCTAAAAGGTTGAGACCAAGGACGGA  
CTACTTACAGTGAGGTTGCAGATGAAATTTGTGGAGAGCTGAAGTTGACTCTTATTGGTCAAGAG  
TTTGATGAGAAGAATATCAGGAGGAGAGTGTATGATGCTTTTAAATGTGCTAATTGCACTACGTGT  
TATCACAAAAGATGAAAAAGAGATAAAATGGATGGGCTTGCTAATTTCCAATATGAAAAGATAAA  
GTTGGAGGAAACTCGCAAAGAACTCATGATCAGGATTAAGAACAAGAAAAAACTTCTCCAGGAA  
ATTGAAAGACAGTTTGTGACCTCCAGAATATCAAGTTTCGCAACCAGTTTCTACAGAGGCCAGC  
AGAGAGTGTGAATGGTATCTGCCTTCCATTCTTATTGGTCAAGGCATCCAGAAAAGCAAGGGTG  
GAGATTGAGATCTCAGAAAAGTCAAGTTTGTGTTTGGACTTCAACTGGTACTACCAGAACTC  
AAAAGTATGCTCCCTCCAAATTA

>JL75\_GRMZM5G850129

ATGATGCTGAGCGGGCACGGCGGGGAGGCGCCTGTTACGGCGTTCGAGTGGCAGGAGC  
TCGAGCACCGGCGCTCATCTTCAAGTACATGGCCTCGGGCGCGCCCGTGCAGCACGACCTC  
GTCCTACCGCTCCGCCTCGCCACCGGCGTGCACACCGCGCCCTCCCTCGCCTTCCCGCCGCA  
GCCTTCGCCGTGCTGGCGTACTGGGGCTGCTACGGCGCGGGGGCGCCGTTCCGGCCGCAAG  
GCGGGCGGAGGACACGGAGCCGGGGCGGTGCCGGCGGACGGACGGCAAGAAGTGGCGGTGC  
TCCAGGGAGGCCACGGCGACTCCAAGTACTGCGAGAAGCACATTCACCGCGGGAAGAGCCG  
TTCAAGAAAGCCTGTGGAAGTGACCTCCTCCCCCGCCGCGGCCCCGCTGCGGGCGTACCGAC  
CGTCCGCGATCTCCACCATCTCGCCGCCCGCGCGGGCCGACGCGCCGCGCCGAGCCTCGCC  
TACCCGCAGCAGCATCTCCTCCACGGCGCCTCCTCCGCAGCAGGAGCAGCAGCCCGCGTCCC  
CGCTGGCGCTCTCCAGCTCCACCTCGACGCGAGCCTGCACGCGGGCGGGCGGGCGGGCGTCCG  
CCATCGCCGCGCCGTCTACCACAGGTACGCCCACTACACACCGCCAGCGTTCGTCGCTCTTC  
CCGGGCGGGGCTACGGCTACGACTACGACTACGGGCAGTCCAAGGAGCTCAGGCGACGGCA  
CTTCCACGCGCTCGGGGCCGACCTGAGCCTCGACAAGCCGCTGCCCGAGCCCGACACCGGCT  
CCGACGAGAAGCAGCCCTGCGGGCGTTTCTTCGACGAGTGGCCGCGGGAGAGCGGGCGACATG  
GCCGCGGACGACGCGACGCGAGCTTTCATCTCCATCCCCGCGGCTTCGCCCTCCGACCTCGCT  
GCTACCTCCGCCTCCGCCGCCGCGCGGATTCCACAACGGGGAGTGA

>JL76\_GRMZM2G061734

ATGGATTGGGATCTCAAGATGCCGGTCTCCTGGGACCTGCCCGACCTGGAGCACGACGCCATG  
CCGCCGCCGCCGCCCGTCTCCGCGGCCCTCCACCGCGGCGGCGTTCGGGCATTGCCGCCGAC  
CTGCCGCGCCTTCTCCGCGACGGCGCCGAGCCGGGCGGAGTGCTCCGTCGACCTCAAGCTC  
GGCGGGCTAGGCGAGTTCGGGGCGGCGGACGGCACGGCCACGAAGGAGCCGGCGGCTGCAA  
CCGCAGCTCCGTCCGCCAGCCCGATGAAGCGCCCGCGCTTGGGGCCCGGCGGCGCCGGCGG  
GGCGCAGTGCCCGTCGTGCGCGGTGGACGGCTGCAAGGCCGACCTGAGCAAGTGCCGCGACT  
ACCACCGCCGCCACAAGGTCTGCGAGGGCGCACTCCAAGACGCCCGTCGTGTCGTGCGCCGGC  
CGCGAGATGCGCTTCTGCCAGCAGTGACGAGGTTTCACTTGTCTCTAGAGTTTGATGAGGCC  
AAGCGCAGTTGTAGAAAGAGGCTTGACGGGCACAACCGGCGCCGACGGAAGCCGCAGCCAGA  
TACCATGAACTCTGGGAGCTTTATGACAAGTCAACAAGGCTTGTTCGAGTGACAGGGACAAGG  
TTCTCGTTCGTTCCCGGCTCCAAGGCCGAGCCAAGCTGGTCTGGAGTCATCAAATCCGAGGAC  
AGCTCATACTACACACACCACCCGGTGTCTCAGCAACAGGCCGCACGTCCGCCGGCACCTCCACG  
TCGCCGGCCTACTCCAAGGAAGGCCGGCGCTTCCCGTTCCTCCAGGACGGCGACCAAGTCAG  
CTTCAGCGCATCAGGCGCCGGGACGCTCGAGGTCTCCACGGTGTGCCAGCCCCTCTCAAGA  
CGACCGCCGCCGTGGCCCCGCCGCCGCCGAGAGCAGCAAGATGCTCGCCCCCGTGTGGA  
CTCGGATTGTGCTCTCTCTTCTGTTCATCCCCGCCAACTTTCAGCGTCGACGTGAGCCGG  
ATGGTCCAGCCCGCGGAGCGCATCCCCATGGCGCAGCCCCTCGTCCCCGGCCTCCAGCACCA  
CCAGTTCGGCGGCTCCCCGGTGGCCGACTGGTTCGCCGGCTCCGGCGCCGTCCCTGCCGCG  
GGCACCGGCGGGTTCGCCTGCCCCACAGCGTGGAGAGCGAGCAGTTCAACACAGTCCTAGT  
GCCGAGCTCCGACGGCGGCCACGAGATGAACTACCACGGCATATTCCACGTCCGGCGGCGAGG  
GCTCCTCCGACGGGACGTCCCCTTCGCTCCCGTTCGTGGCAGTAG

>JL77\_GRMZM2G318592

ATGGAGTTCGGCTTCCGCGCAGGAAACAGCACGCAGCGCCGCCCTTCCCCGATCGACGCGT  
CACAGCACAGCAAGCCGGACCCTTCCACGGCGACCACCCGCCGCCCTCGCCGTTGCAGTGGG  
AGGCTGCGGCCCGGCGCGAGCGGATCAAACGCGAGGTGGAGCGCCGGCTCATCGAGGAGGA  
GGTCCGCCTGGAGCTCGCCCTTGAGCGCGCCCGCCTCCACGGTGGTTTTGGCCCCGCCCGT  
TCTCGGGACCGACGGCTCCGTGTCGCGGTGCCGCCTCCACCTCCACCTCCAGGCCGGTTC  
TCCAGGGCCGACGGCCATCGATGACGCCGGCAATGTCGTGGGACAGCCCTCGGGCGGCTCGC  
GAGATTTGAGCAACCGATGCTCCTCAGTGAGACGGGAACGTGGTCCCTGCTGCCGAAGCCGAG  
GCATACGCTCCGGCTGCGCGAGATCGCGCCCAGCGAGAGCTCCGAGGTTCTTTTCATCAGCAAC  
AAAGGCTTCTGGCGTGAAGAGGAAAGCAGCAGCTGCGATTTCCGCAACAACGACTGAACAACA  
ACCAACGGGAGTACAAGACCCGAGTTCCGGGCAATGGAGCTGCGCAATCTGCCAGGTGAGCG  
CGACCAGCGAGGCCAACCTGAACGAGCACCTCCAAGGGAAAAAGCACAGGGCAAAGCTGGCC  
CGATGCGGAGCGACCAAGGCGACGACGGATCCTCCTCCTAACAGAAGCGGCGATGGCGCAGT  
AGCAGTAGCAGCAGGCCCGAGCGACGCGCCGAAGAGGATCCAGATCCTGGTCGACGGGGAGG  
CGCACCAGGTGTCAGAGGAGCAGCTGCGTGTGGTTCGAGCGCTGCAGGGTCCGGCTGCACC  
AACGCCGCCGCATGGTCGACCATCTGCGGGGCAAGAGGGCACAGCCTGTGCAACAAGGTCTG  
GACGGCGATAAAGGCCGTGAGGAGGAGCAGCTAA

>JL78\_GRMZM2G095899

ATGGAGGACTCGAGCCAGTTCATGCAGTGGGCCCTGAGCACGCTGCAGCACGATGAGCTCCCA  
CCGGCGACGCCGCCGGCGGCCATCGCCTACGACGACAATGACTGCAACACCTTCTCATCAGTC  
CCGGCGCTGGGGTACTCCGCTGCATCAGTCAACAGCATGGTCCCGGCGGAACCACCAGCACA  
GGAAGGCCACCGGGCCACCGCCGCCACCAACAGCTGGAGCTCGGCCGACACCGCGTCCGTCA  
CGGCCGCGCAGCGTGACGCCTGGTCGCCGTCTTCGCAGCAGAACTCGGTCAATTGTGCCACG  
CCCCGCAGCAGCGGCAGCAGCCAGCCGTGAGCTGGGACTTCCATTCCGGCGTCCGGCTCCGGC  
GTCGGCGCAGCTAATAATCAAAGAAGCCAGGTCAACTCTGCCACGGCCGCAAGGGCAGAGAG  
CGCCGCTGGCGGCATGCCGGTGCCACAGCCACAGATGGTTCAAACGGGTCCGCCGCCGACGA  
GGAGGGCCTCTGCCAAAATGTCGTGCGCTTCTTCGTCTGCGCCGCCGTGCTCCCAGGATCACA  
TCGTGCGGGAGCGGAAACGCCGGGAGAAGATCAACCAGCGTTTCATTGAGCTCTCGGCAGTCA  
TCCCCTGCCTCAAGAAGATGGACAAGGCGACTATCCTATCCGACGCGACGAGGTACGTGAAGG  
AGTCCAAGAAAAGCTCAAGGCACTGCAACAAGGCGGAAGCTGCAACGCCCGGGGCGGCACG  
GAGTCGGCGCCGGTGTGTCAGAAGCCGCGCATAGCGGCGCCGGGGGATGACGACAAGGA  
CCGCGGCGGCGCGCCTTCCCCTTCTGCGCGCCGCCTGGGGTTCGGCGGACACCAGGGAAC  
GCGCTGCCGGAGATCGAGGCGAGGATCTCGGACGGCAACGTGTCGTGATGCTGAGGATCCACTG

CGAGGACGGCAAGGGGGTGCTCGTCAGGCTGCTGGCCGAGGTTCGAGGGACTCCGCCTCAGCA  
TCACGCATACCAATGTCATGCCCTTCTCGGCCTGCATCCTCATCATAAACATAATGGCAAAGGTG  
GCGGAGGGCTTCAACGCCACGGCGGATGGCATTGTAGGGAGGCTTAATGCAGTGCTAGCAGCT  
GGACCAACGTGTTAG

>JL79\_GRMZM2G015666

ATGGCACTGGAGGCCGTGGTGCTATCCCAGTCCCAGTTCAGCAAGGCAGTCGCTTTGGGTGC  
GGTGCCATGGCAGCAGGAGGGGCTTGGAGTGATCTGTTGTTTAGTGGAACGGAGGGGTTGTTT  
GAGATGGGTGGCGCCCGCCGGCCGCGGCTGGAACGCGGCCGCGAGCTCGCCGCCGAGCTCC  
TGCAGGAGCTGGGTGACAACGGTGCTGCCGGCTCACTACCTGTGGCGTCTGCCGGGAGTGCG  
AGTGGCGGCCGCGGTGAGGATGCCCCGGCAATGGCTGCGGCAGCGGCGTCCGGAAGGAGGA  
AGCGGCCGAGGATGAGGCCAGTGAAGAACGAGGAGGAAGTGGAGAGCCAGCGGATGATCCAC  
ATTGCGGTGGAGCGCAACCGCCGCAAGCAGATGAACGAGCACCTCGCCGCGCTCCGCTCACT  
CATGCCGCCGGCCACACGCAACGGGGCGATCAGGCATCCATCGTCGGCGGCGCGATCAACT  
TCGTCAAGGAGCTGGAGCAGCTGCTGCAGTCGCTGGAGGCGCGGAGGCGTTCCCCGCAGTGC  
GCTGCCTACGCCGTGATCCCGACGACGCGGGGCGTTTCGCGGACTTCCCTCACCTTCCCGCA  
GTACTCGATGTGCGCCGTCAATTGCGGCCCCAGAGAACAACCTGGCCACCACCGTGAGGGCGGCG  
CCGTGCGCCGAGCAGGAGGCGTCCGGGTGCAAGCCGTGCGCCGTGGCCGACGTCGAGGCGAC  
AATGGTGGAGAGCCACGCCAACCTGCGGGTGCTGTCCCGGCCGCGGCCGAGGCAGCTGCTGC  
GCCTGGTGCTGGGGTCCAGGGCCACCGCCTCACCGTGCTCCACCTCAACATGAGCAGCGGC  
GCCACATGGTGCTCTACTCGTTTAGCCTCAAGGTGGAGGATGATTGCCAGCTTACCTCCGTGG  
GTGAGATTGCGGCTGCGGCTCATCACATCGTCGAGAAGATTAATGAAGAGCAAACAAGGCTG  
CAGCTTAG

>JL80\_GRMZM2G126018

ATGGCGACCGGCGGCGGCGGTGGGAGCGACGACTTCCACGGGCTCACGTTCCGGCCAGAAGAT  
CTACTTCGAGCAGGACGCGGGGCGCCGCCGGGGGAGCGCGACGGGCGGCAGGAAGGGGAA  
GGGCGCCGCGGCGTCCGCGAGCGCCGCCAGCCGCCGCGGTGCCGGGTGGACGGGTGCGG  
CGTGGATCTGAGCGCCGTCAAGCAGTACTACTGCCGGCACAAGGTGTGCTACATGCACTCAA  
GGAGCCGCGCGTCTTCGTGCGCCGCATCGAGCAGCGCTTCTGCCAGCAGTGACAGAGTTCC  
ACCAGTTACCTGAATTTGACCAAGGGAAACGAAGCTGCCGCCGCCGCCCTCATTGGTCACAACG  
AGCGCCGGAGGAAGCCACCACCTGGACCACTCACCTCACGATACGGCCCCGCTTGCTGCATCAC  
TAGTTCAAGAGCCTGGTAGGTTGAGGAGCTTCTGCTCGACTTCTCGTACCCGAGGGTTCCAAG  
CAGCGTGAGAGATGATGCGTGGCAATGGCAAGGGATGCAGCATGGCGGCGACAGGATGCTGC  
TGGGTACCGCCAGCGCCATCCAGTGGCATGGGAACCAAGAACCTCACCCACCACATCGCAGCG  
CAGCTGCGGGCTATGGCAACCATGCGTACAACAACCTGCCATGGTGGCGGCGGCTTGGTAGCAG  
CAGCAGCGGGGGCGTCAATGCTCTCCTCTGCCTTCGAGCCCCCGCCTGGCGGTGGCGGATGT  
GTCGCAGGAGCTACCGCGGCCGACTCCAGCTGTGCTCTCTCTTCTGTCAACTCAGCCATGG  
GATACGCCACCCAAAGTGGCAGCAGCCACCACAACCGGTCCCAGCGATGTCCGCGGCTGC  
AGGCGCCTTCGAAGTGGCGCCGTGCTCGTGGCGAGCAGCTACACGGCGTGCAGCTCCT  
GGTCTGGCTCACGGGACCCTGCCGACGGCGCCAGGAAAACGCGCAGCGTCACGATGATGGC  
CTGCACCTGGTCCATCCACCAGGCCCGCTCCACCACGGCCACTTCTCCGGCGAGCTCGAGCTC  
GCCCTGCAGGGAAGCGGCCCGCCGCATGTGACCATGGCGGCGGCACCTGCTTACGCCATTC  
TGACACCAACGCGATGAATTGGTCCCTGTAG

>JL81\_GRMZM2G312419

ATGGCCGCTTCTTCGGTGCTGCACCGCCGCCGGCTCTCGCTTCGTTCCGCCACGAGGAGGA  
GCAGCATCAGGACGCCGCCGAGGAGGTGTACCACGTGGACGATGTCGACGAGGGCAGCGGTG  
ACGGCCGTGGCCACGGCGGCGCCGGCCAGGGGAAGCTGTGCGCCAGGGGCCACTGGCGCCC  
CGCCGAGGACGCCAAGCTCAAGGAGCTCGTCGCTCAGTTTGGGCCCCAGAAGTGAACCTCAT  
CGCCGAGAGGCTGGACGGCAGATCAGGGAAGAGCTGCCGCCTGCGGTGGTTCAACCAGCTGG  
ACCCGCGGATCAACCGGCGCGCCTTCTCGGAGGAGGAGGAGGAGCGGCTCCTGGCGGCGCA  
CCGCGCGTACGGCAACAAGTGGGCTCTCATCGCGCGCCTTCCCGGGCCGACCGACAACG  
CCGTCAAGAACCACTGGCACGTCCTCATGGCGCGCAGGCAGCGGGAGCACTCGGGCGCGCTC  
CGCCGCCGCAAGCCCTCCTCGACCTCGCCCTCGCCGGCGCCGGCGCCGGCGCCGACCTGG  
CGCCCGTGTGCTCCTCCACCACCACCACCTACGCCGGCGGCTCCCCTCCCATGCCGCCGT  
TGCACGCCGCCGACGCCACACGCAGTACACGGCGGCGCGGCGGACACCCGCGCGCACAG  
CGGCGGCGAGTCCGACGAGACCGCCTCCACGTGCACCACCGACCTTTCCCTCGCCTCCGCCG

CCCCCTGCTTCTACCAGAGTGGCTACGACGTGGCCCCGCGCGCCGCGGGCGTTTCGCACCGAGC  
GCGCGCTCCGCCTTCTCCGCGCCGCGGGCGACGGCGCGCTCCGACGACAAGGTCTCGCTGCC  
CTTCTTCGACTTCTCGGCGTCGGCGCGGGCGTGA

>JL82\_GRMZM2G478876

ATGGACGCCGCCGGGCCCATCGGCAGCCAGTGGCTCCGGCTCCAACCTCCAAGACCTCCCT  
CCTCGGCATGCCGGTTCATCGCGATGGCCGCCGCCGCGGCACTCGTCGTCTGCTCGTCC  
TCTCCGCGGTTGTCGCCGCTGTTCTACTCGCGCGCAGGCGGGGCGCAAGGCCGCCCTCGCTG  
TCGCGCGTCGAGCACGCGCCGTCTCCGCCTCCGCCTCCGGCTCCTCCCGCGCCCGC  
GTCGTCCGCGCGCAGGGAGAAGGTTCGGCGCGGACCAGGTTCGCCGGGGCGGGCGCCACCTCC  
TCATCTGGCGTTGCCAGCTCCTCCGCGGCCGCGAGCTCGCTCGAGTCGCCGGTGAAGAGGAA  
GGCGGAAGCGGTTCAGGGCCGCGGGCGGGCGTGGACATGGAGATGGAGATGGGGTGGGGGAG  
GTGGTACGACCTCACGGAGCTGGACGTGCCACGGGCGGGTTCTGCCAGAGAACGTGGTCCG  
GGGAGGGAGGCTACGGCACCGTGTACCGCGGCATCCTTGCCGGCGGGCGAGGTCGTCCGGT  
CAAGGACTTGTGGATCACAAGGGTTCAGGCCGAGAAGGAATTCAAGGTGGAGGTTGAAGCCAT  
CGGCAAAGTGAGGCACAAGCACCTTGTGGTCTCATCGGGTACTGCGCAGAAGGCCCTAAACG  
GATGCTCCTTTACGAGTTCGTGAAAACGGGAACCTGGAGCAGTGGCTGCACGGCGACGTCCG  
TCCGGTCAGCCCTTTGACCTGGGAAATACGGATGAAGATCGCCGTCGGAACGGCCAAAGGCAT  
AGCGTACCTGCACGAAGGCCTGGAACCGAAGGTGGTGCACCGCGACATCAAGTCGAGCAACAT  
CCTGCTGGACAAGAAGTGGAGCCCCAGGGTGTTCGGACTTCGGCATGGCCAAGGTGCTGGGGT  
CCGGGTCCAGCTACGTGACGACCCGCGTGTGGGCACGTTTCGGGTACGTGGCCCCCGAGTAC  
GCGTCCACGGGCATGCTGAACGAGAGCAGCGACATCTACAGCTTCGGCGTGCTGCTCATGGAG  
CTCATCTCCGGGCGCAGCCCCGTGGACTACAACCGCCCCGCCGGCGAGGTCAACCTGGTGGAA  
GTGGTTCAGGGGCATGGTGGGCAGCCGGCGCGTGGAGGACCTGGTGGACCCGCGCATCGCC  
GCGCCGCCGCCGCCGCGGGTGTCAACCGGGTGTGCTCGTCTGCCTCCGCTGCATCGACGC  
CGACGCGCACAAGCGGCCCAAGATGGGGCAGATCGTGCACATGCTCGAGGGGCGACGAGTTCC  
CCTTCGCGACGGAGCACCGCTCGCCGAGGGCGTCTCACCGGACGTTCGATGGCCACGCGGCCG  
TCGCTTCTGTTCGGAGAACGTAGGTGCCACTGACGACTCAGACAAGTCCATGTGGAGATGA

**Information S2.** Individual datasheets for T0 rice lines summarized in Dataset S2. Each page shows the gene expression profile in maize foliar and husk leaf primordia as reported in <sup>1</sup> (green circles refer to relative expression level in samples of the shoot apical meristem plus plastochron 1/2 leaf primordia, orange circles to levels in P3/4 leaf primordia and blue circles to levels in P5 leaf primordia); construct composition and ID; number and ID of independent transgenic rice lines. Cropped agarose gel images show PCR products of representative genomic PCR reactions (detecting presence of transgene). Linear regression plots illustrate number of veins versus leaf width in each line (x axis = leaf width in cm; y axis = vein number). Representative leaf samples are shown with views of the adaxial leaf surface taken using a hand-held microscope.

GRMZM2G123900

ZnF DoF

Gene ID: JL44

Foliar expression

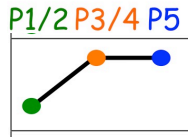

Husk expression

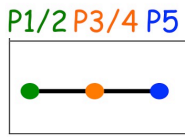

Construct: ZmUBI<sub>pro</sub>:cDNA (ID# IRS1085)

Nineteen independent T0 lines:

IR64-IRS1085-001 to IR64-IRS1085-019

### Genomic PCR

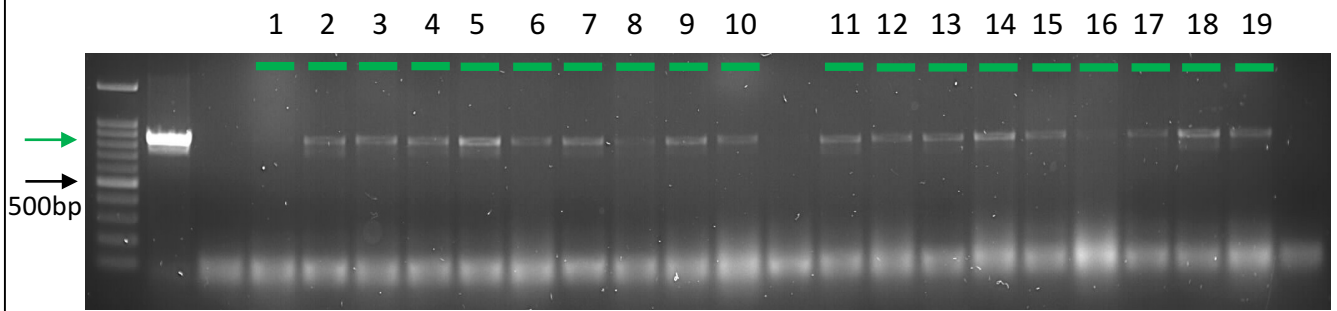

### Number veins versus leaf width

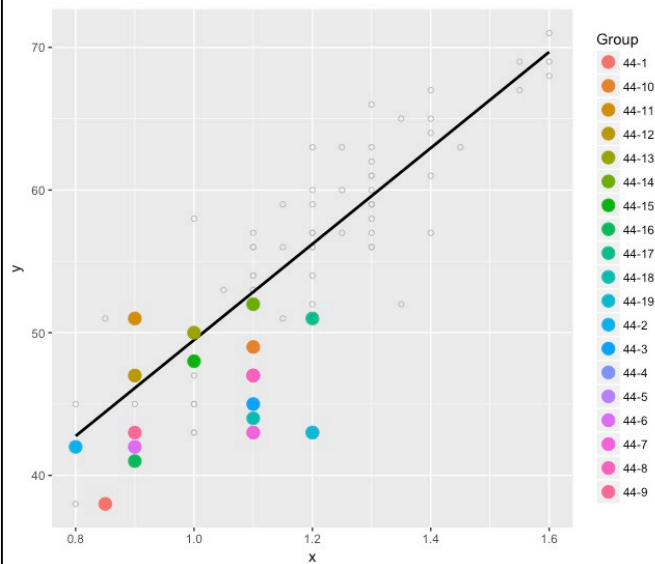

Representative surface image of segregating WT leaf

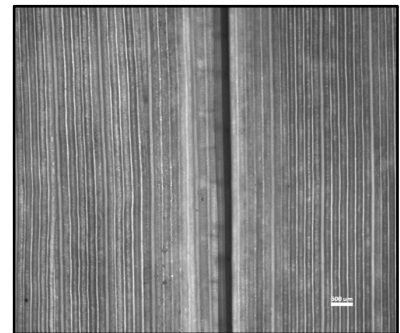

Representative surface image of line 15 leaf

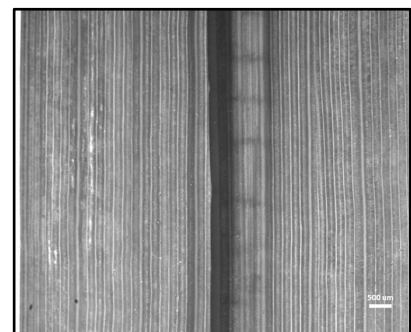

GRMZM2G374986

Myb

Gene ID: JL45

Foliar expression

P1/2 P3/4 P5

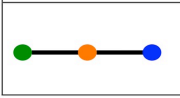

Husk expression

P1/2 P3/4 P5

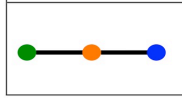

Construct: ZmUBI<sub>pro</sub>:cDNA (ID# IRS1086)

Thirty five independent T0 lines:

IR64-IRS1086-001 to IR64-IRS1086-035

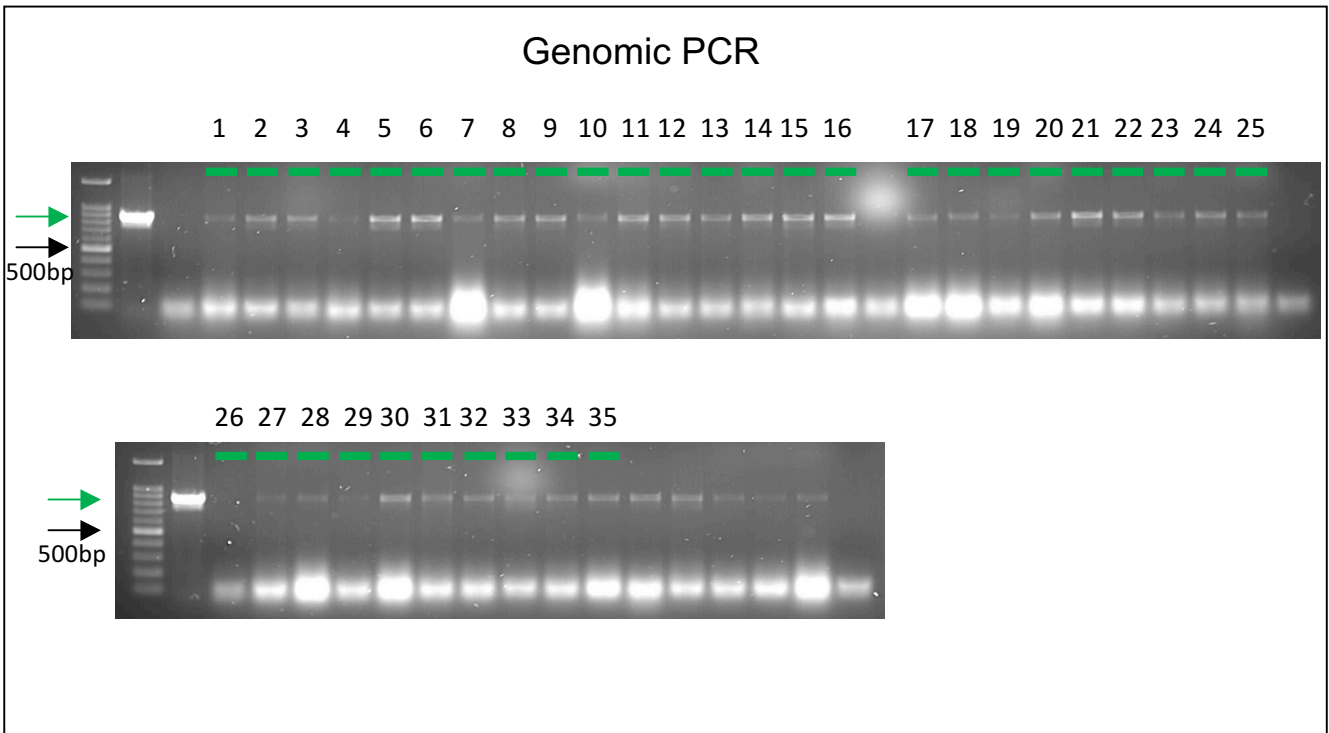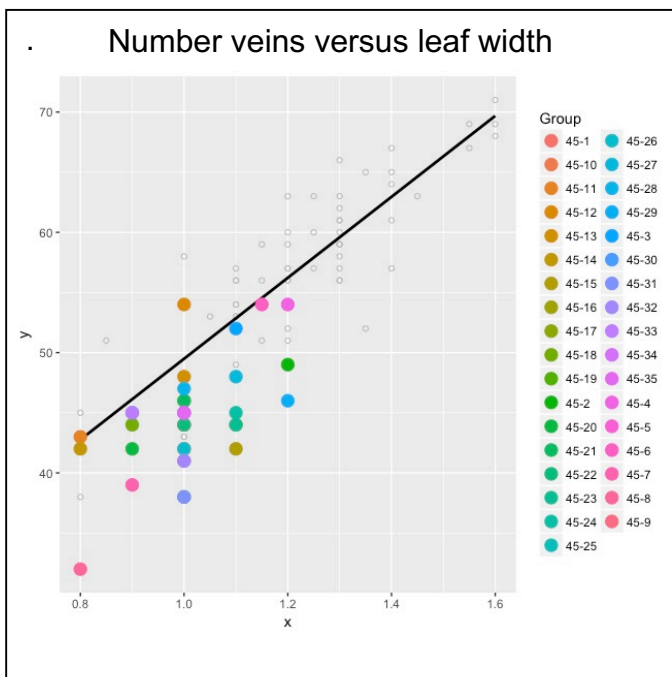

Representative surface image of segregating WT leaf

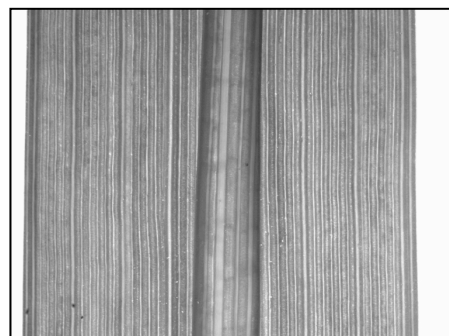

Representative surface image of line 35 leaf

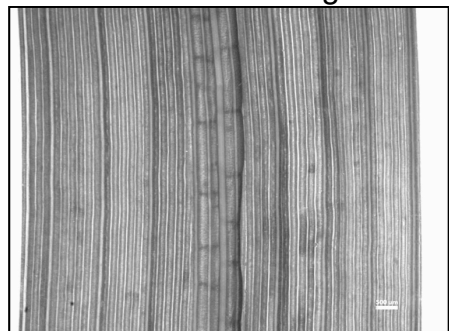

GRMZM2G163975

AP2 domain

Gene ID: JL53

Foliar expression

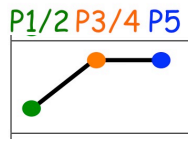

Husk expression

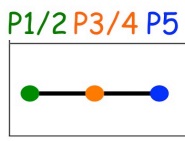

Construct: ZmUBI<sub>pro</sub>:cDNA (ID# IRS952)

Twenty independent T0 lines:

IR64-IRS952-001,002,005,007,008,013,014,017-020,023-025,028-031,034,035

### Genomic PCR

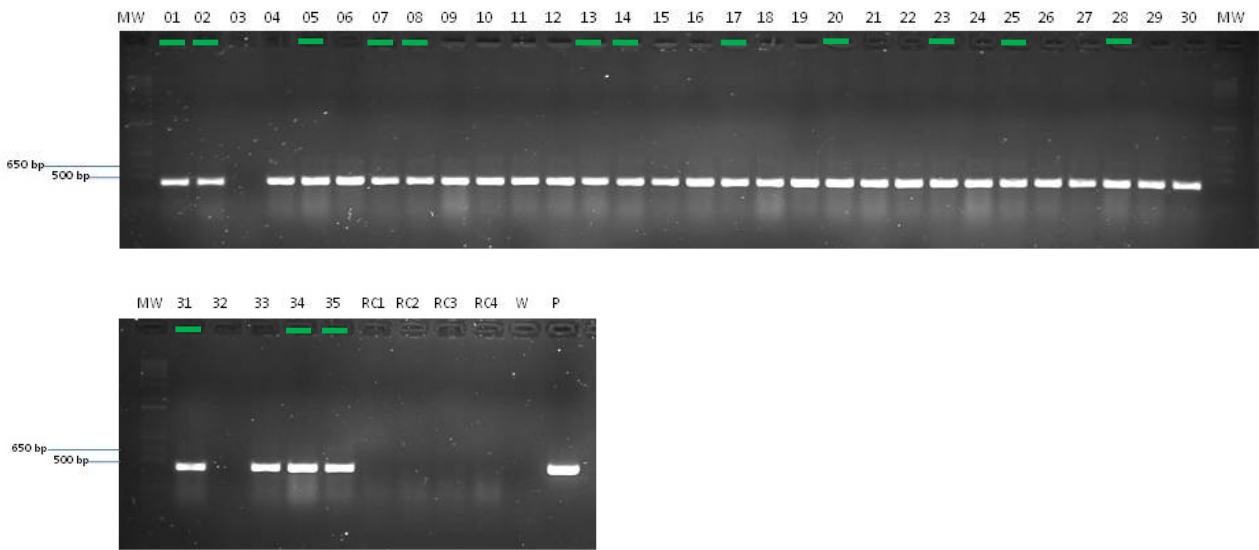

### Number veins versus leaf width

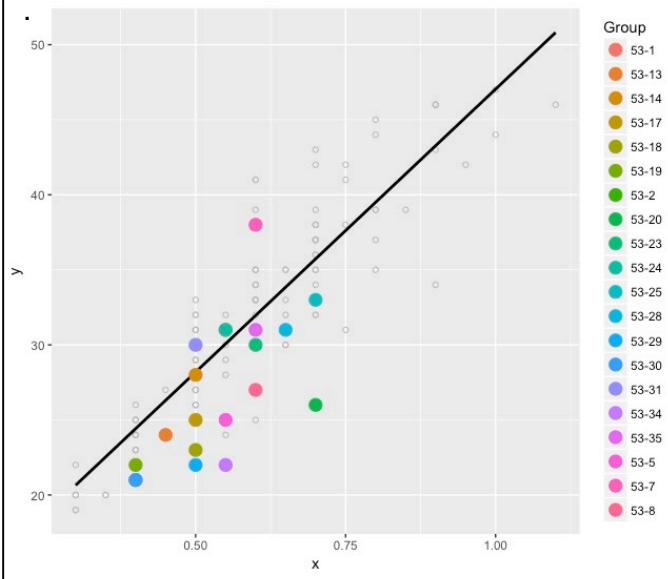

Representative surface image of segregating WT leaf

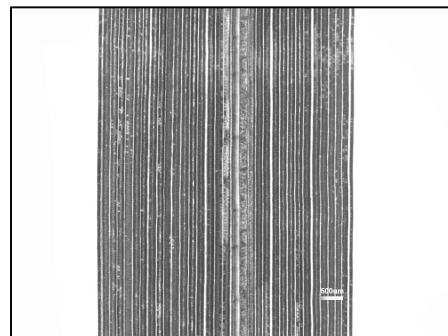

Representative surface image of line 14 leaf

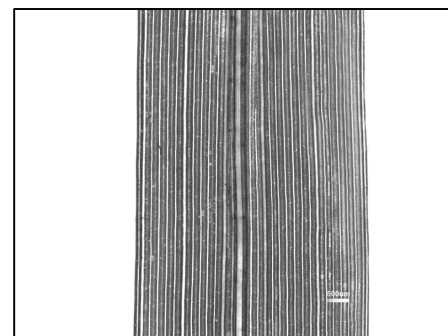



GRMZM2G077219

unknown

Gene ID: JL54

Foliar expression

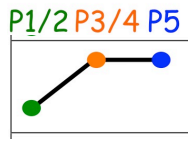

Husk expression

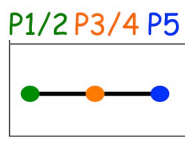

Construct: ZmUBI<sub>pro</sub>:cDNA (ID# 1010)

Seventeen independent T0 lines:

IR64-IRS1010-002-004,007-009,015,016,018,019, 021,022, 028-030, 034,035

### Genomic PCR

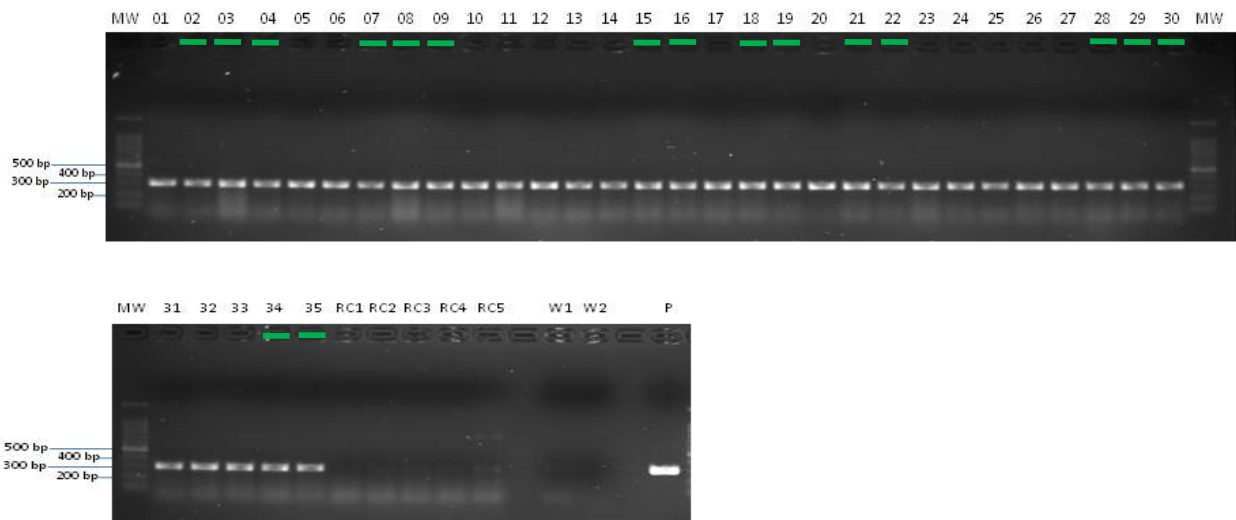

### Number veins versus leaf width

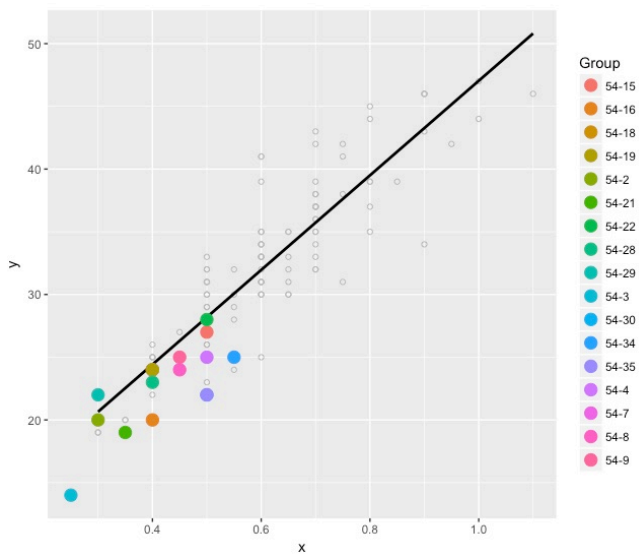

Representative surface image of segregating WT leaf

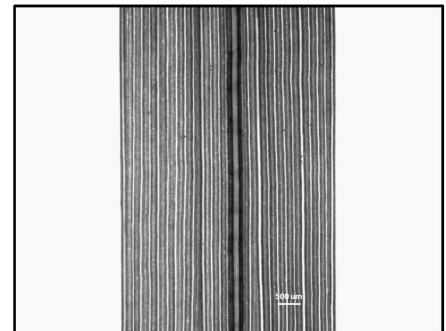

Representative surface image of line 19 leaf

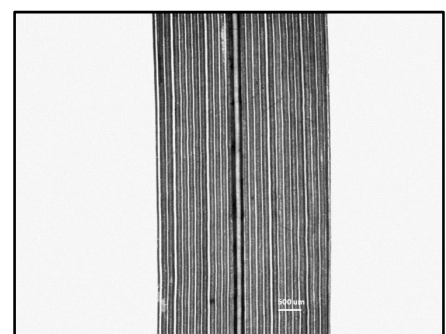

GRMZM2G082586

bHLH

Gene ID: JL55

Foliar expression

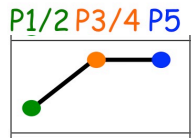

Husk expression

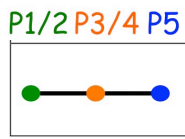

Construct: ZmUBI<sub>pro</sub>:cDNA (ID# 878)

Ten independent T0 lines:  
IR64-IRS878-001-009, 011

### Genomic PCR

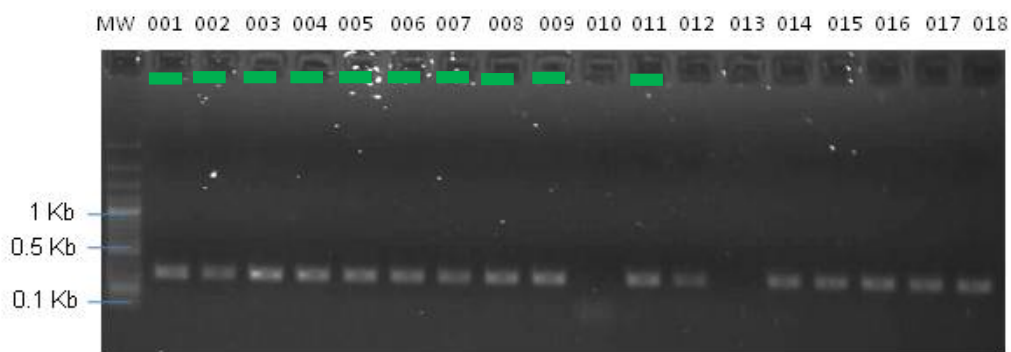

### Number veins versus leaf width

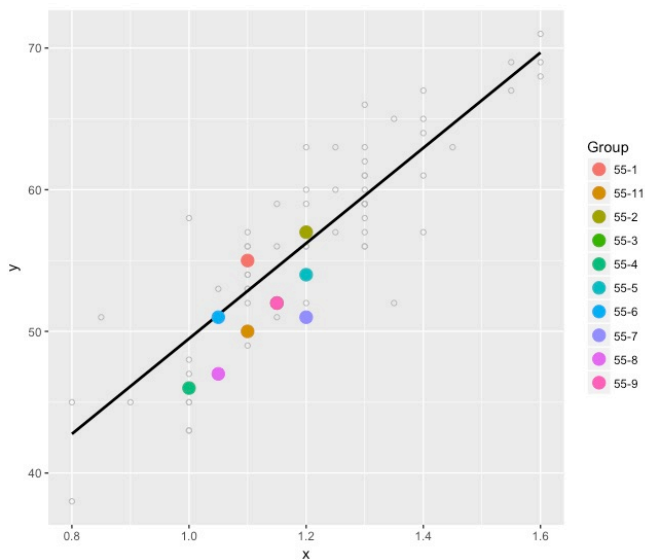

Representative surface image of segregating WT leaf

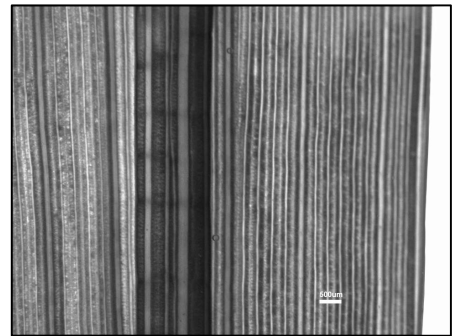

Representative surface image of line 1 leaf

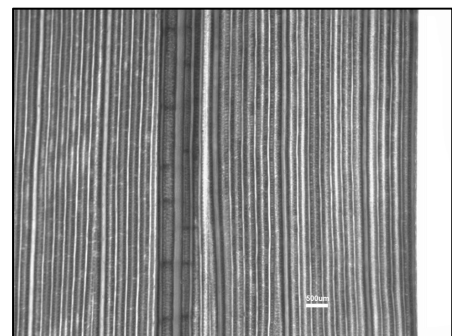

GRMZM2G171365

MADS box

Gene ID: JL56

Foliar expression

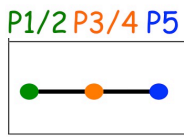

Husk expression

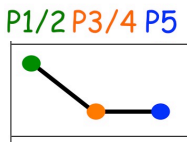

Construct: ZmUBI<sub>pro</sub>:cDNA (ID# 921)

Thirty four independent T0 lines:  
IR64-IRS921-001-004,006-035

### Genomic PCR

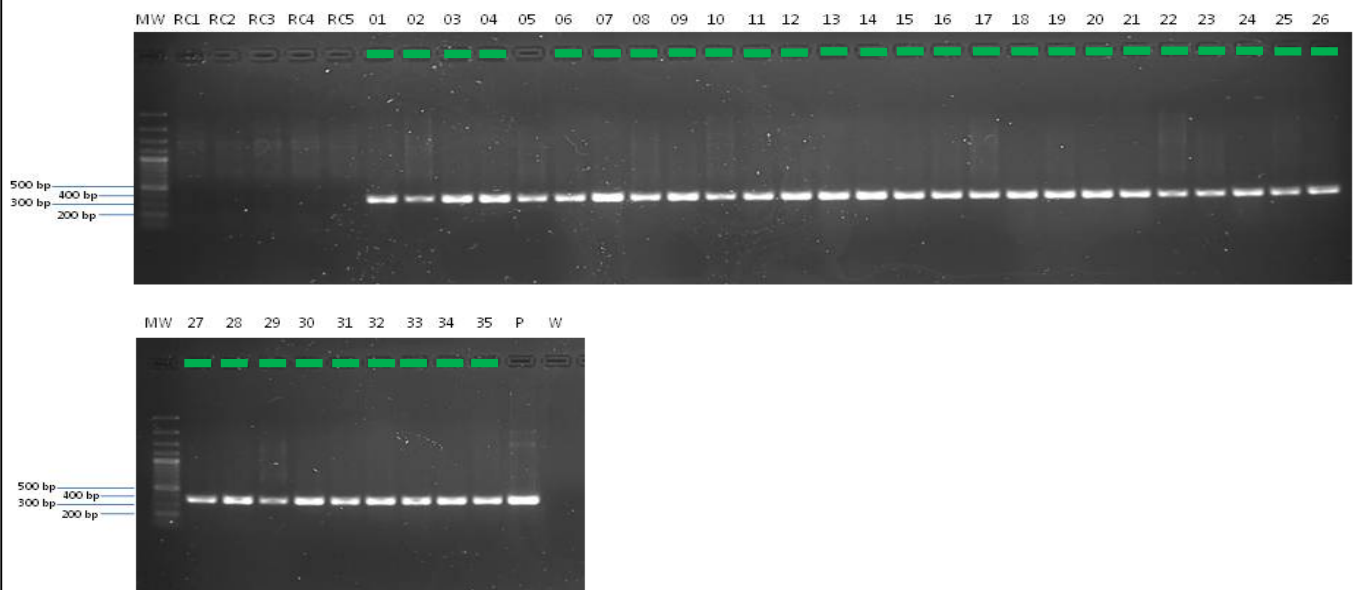

### Number veins versus leaf width

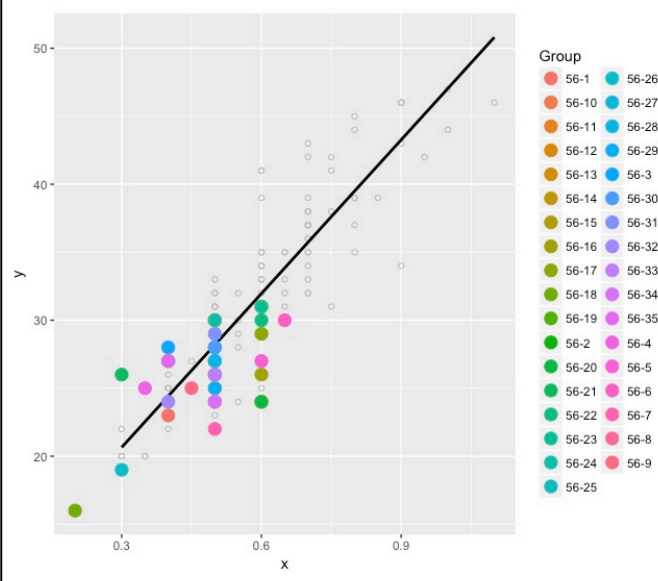

Representative surface image of segregating WT leaf

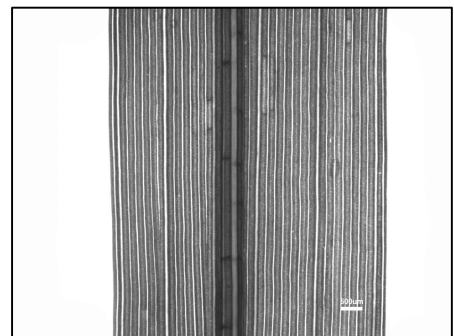

Representative surface image of line 30 leaf

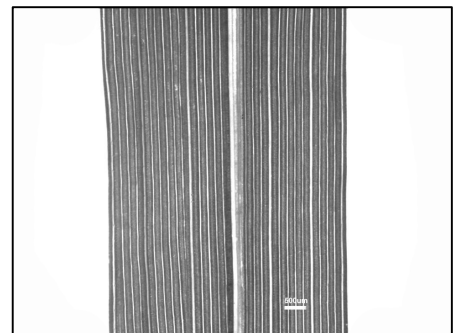

GRMZM2G098813

LFY-like

Gene ID: JL57

Foliar expression

P1/2 P3/4 P5

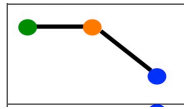

Husk expression

P1/2 P3/4 P5

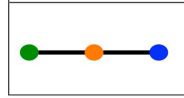

Construct: ZmUBI<sub>pro</sub>:cDNA (ID# 922)

Thirty four independent T0 lines:  
IR64-IRS922-001-033, 035

### Genomic PCR

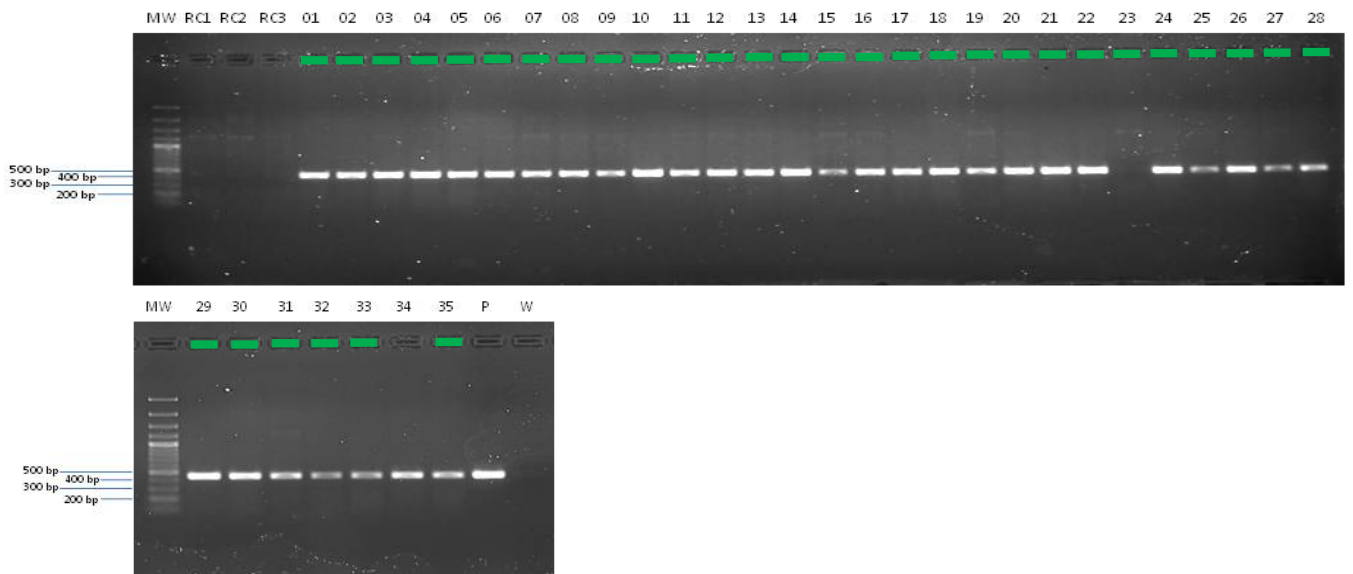

### Number veins versus leaf width

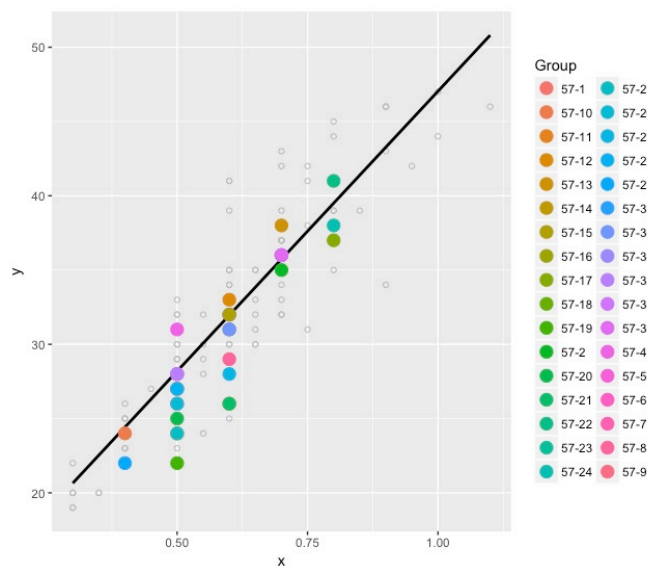

Representative surface image of segregating WT leaf

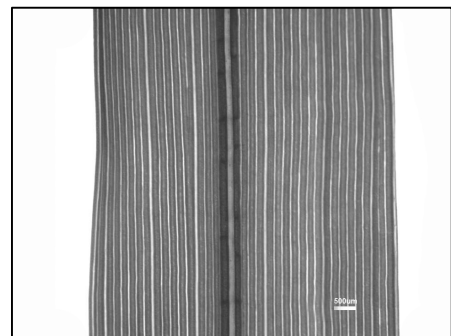

Representative surface image of line 12 leaf

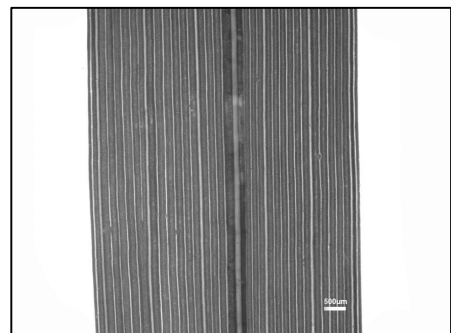

GRMZM2G139324

unknown

Gene ID: JL59

Foliar expression

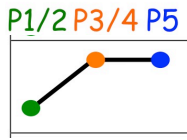

Husk expression

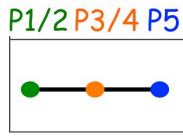

Construct: ZmUBI<sub>pro</sub>:cDNA (ID# 1004)

Thirty five independent T0 lines:  
IR64-IRS1004-001-035

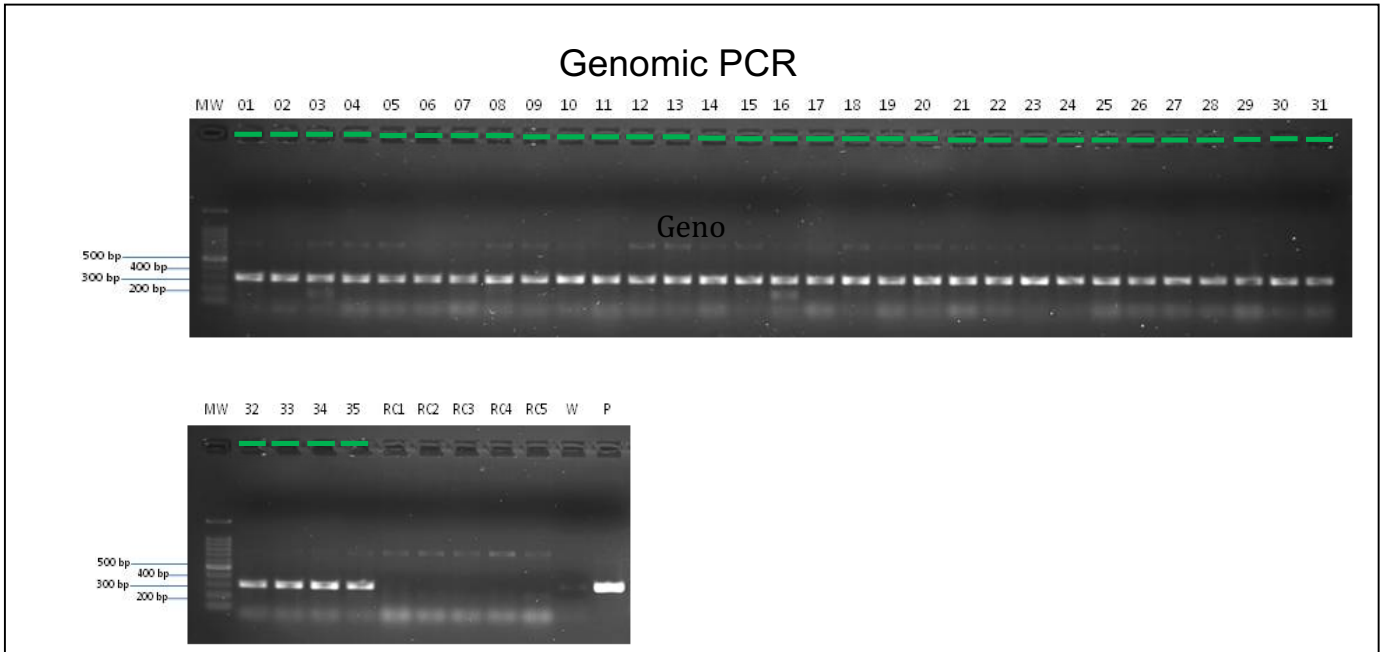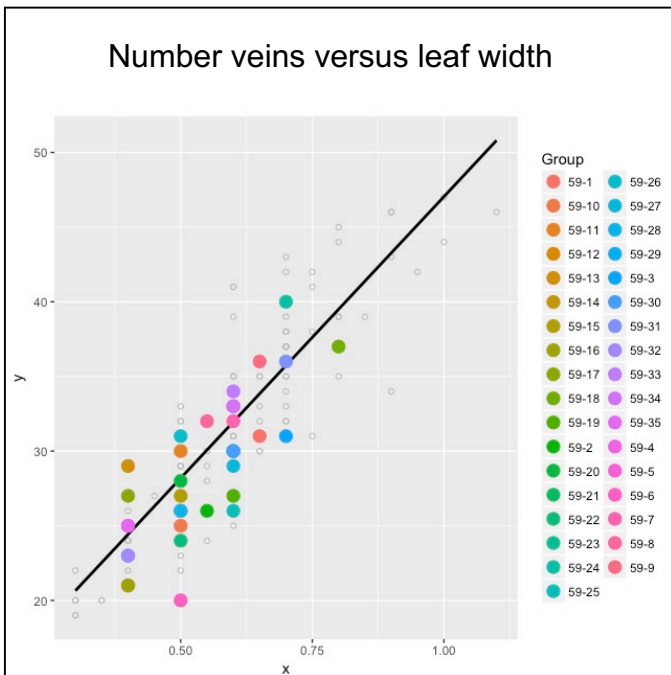

Representative surface image of segregating WT leaf

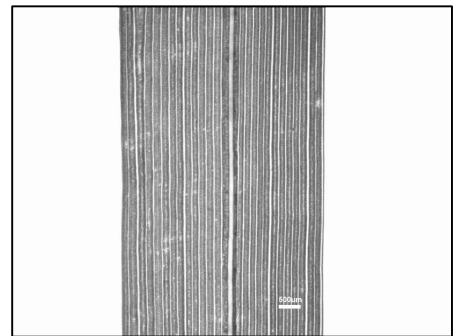

Representative surface image of line 5 leaf

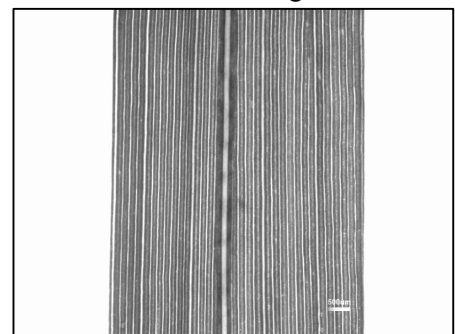

GRMZM2G061314

LRR binding protein

Gene ID: JL60

Foliar expression

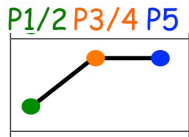

Husk expression

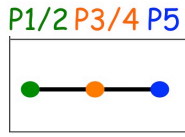

Construct: ZmUBI<sub>pro</sub>:cDNA (ID# 945)

Twenty eight independent T0 lines:  
IR64-IRS945-001-028

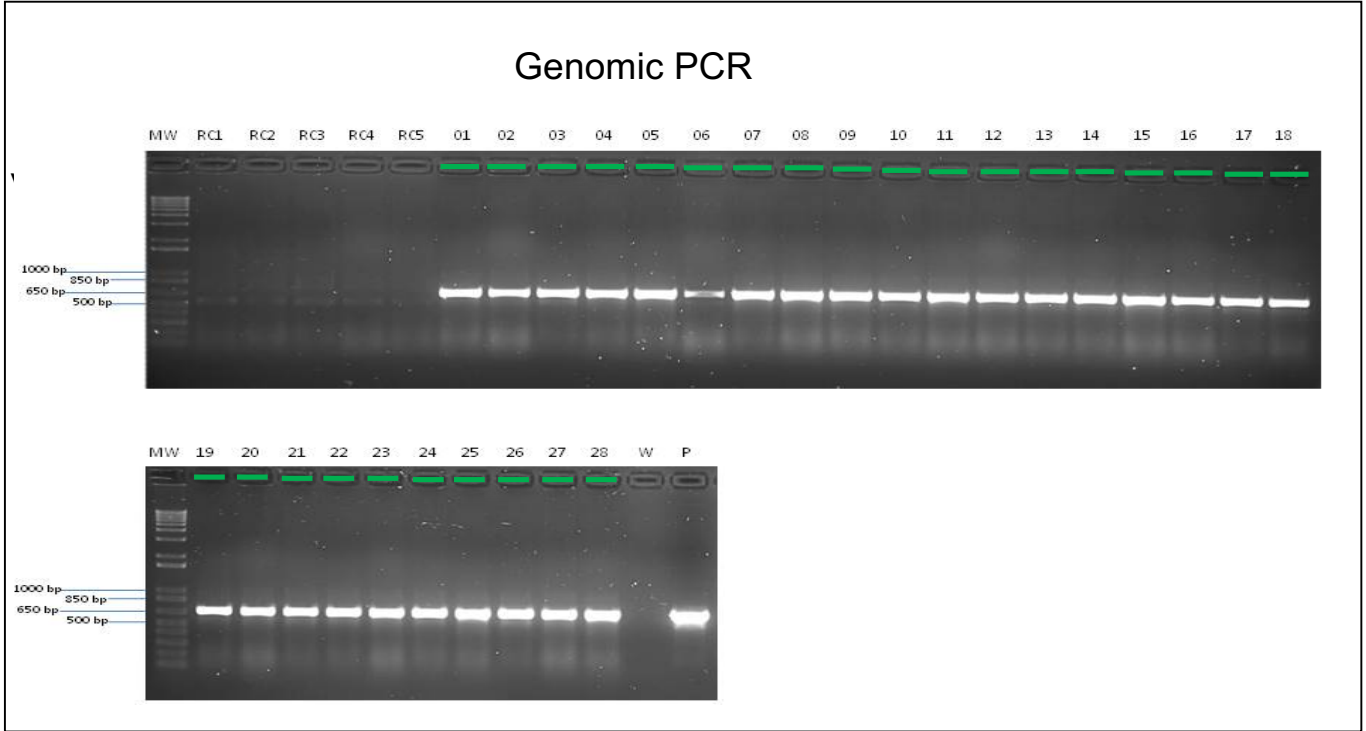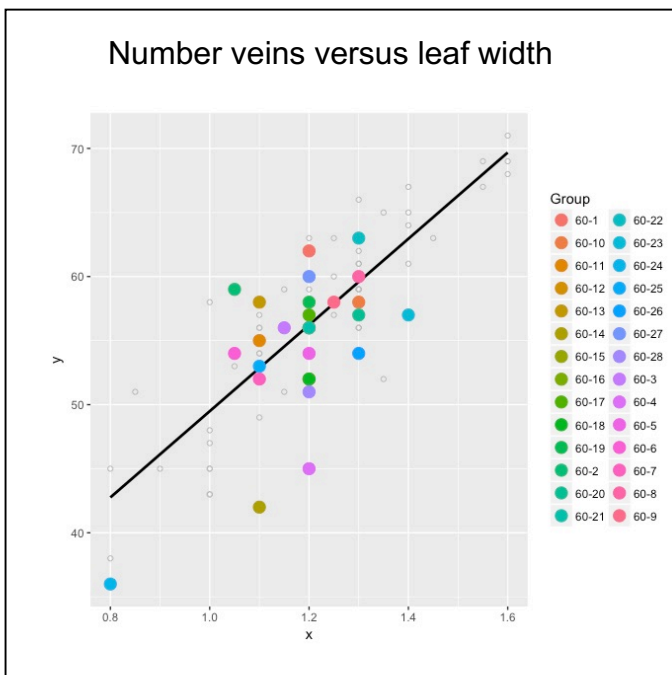

Representative surface image of segregating WT leaf

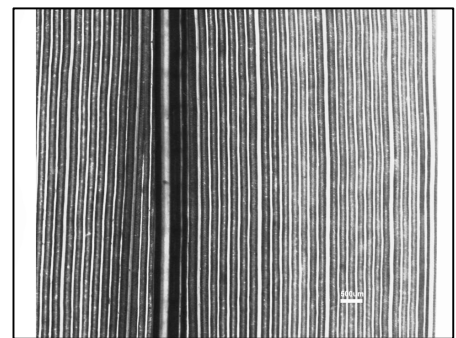

Representative surface image of line 16 leaf

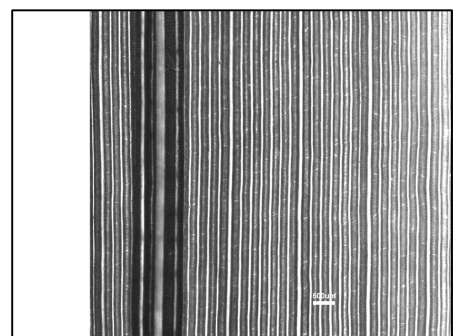

GRMZM2G151955

LRR RLK

Gene ID: JL61

Foliar expression



Husk expression



Construct: ZmUBI<sub>pro</sub>:cDNA (ID# 1078)

Thirty four independent T0 lines:  
IR64-IRS1078-001-009, 011-035

### Genomic PCR

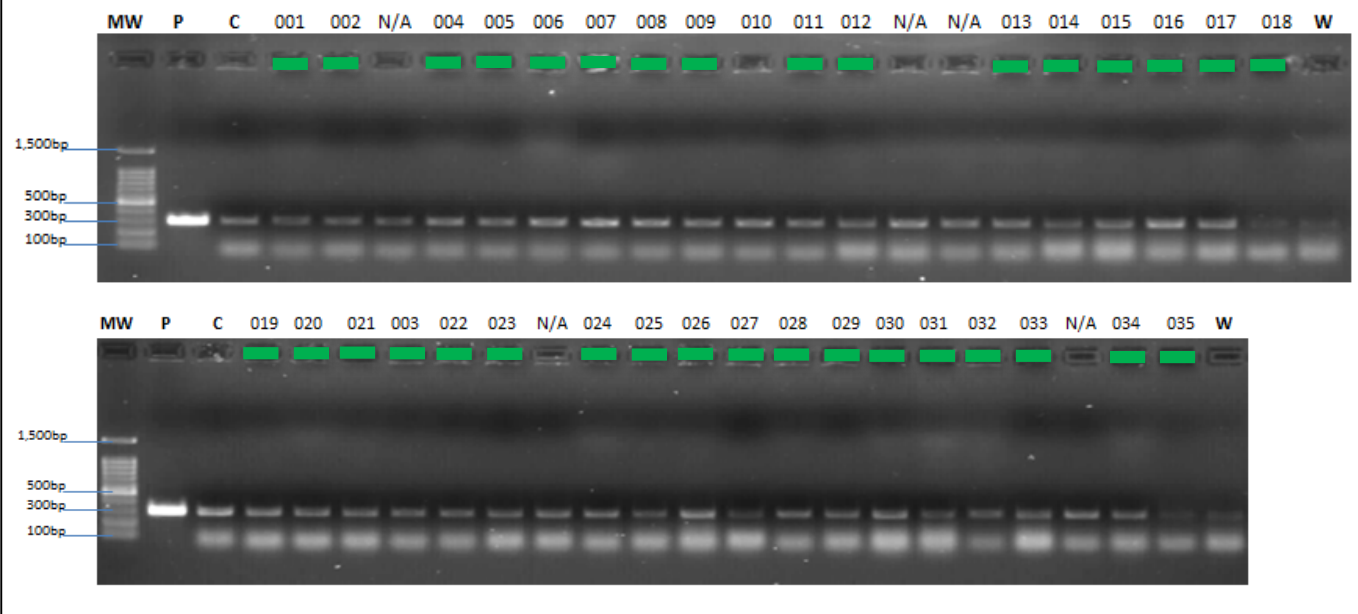

### Number veins versus leaf width

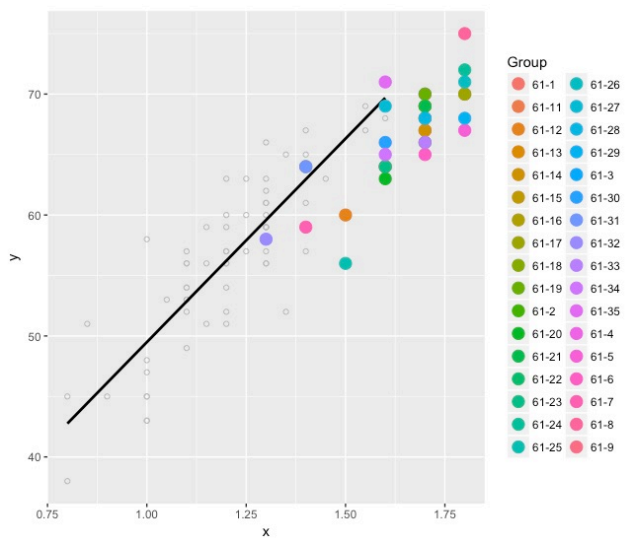

Representative surface image of segregating WT leaf

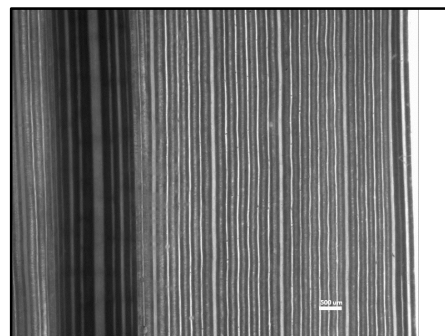

Representative surface image of line 3 leaf

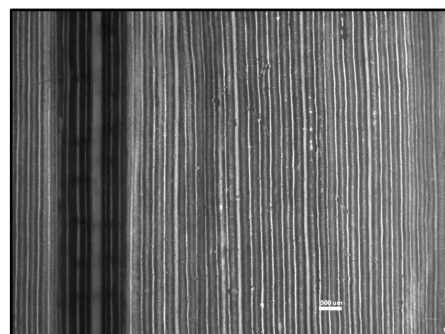

GRMZM2G159953

Lectin family RLK

Gene ID: JL62

Foliar expression

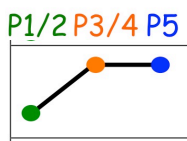

Husk expression

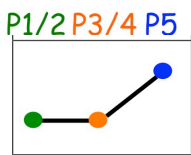

Construct: ZmUBI<sub>pro</sub>:cDNA (ID# 913)

Ten independent T0 lines:  
IR64-IRS913-009-016A, 017B, 018

### Genomic PCR

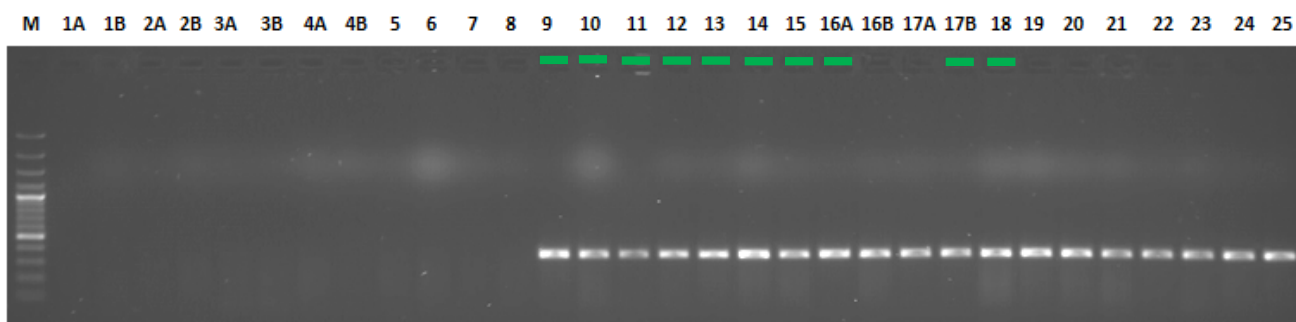

### Number veins versus leaf width

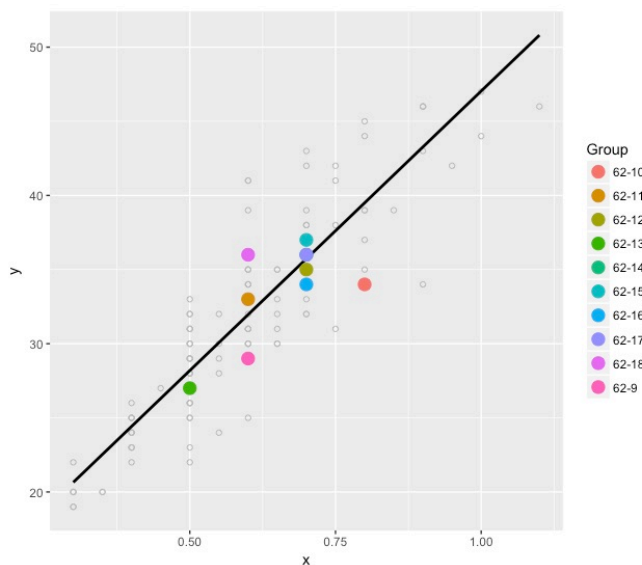

Representative surface image of segregating WT leaf

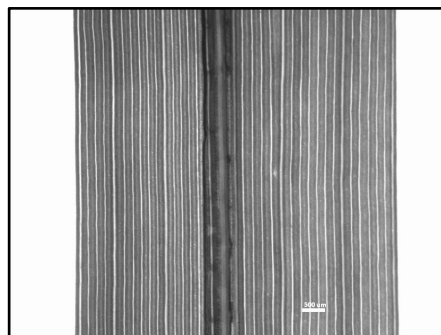

Representative surface image of line 12 leaf

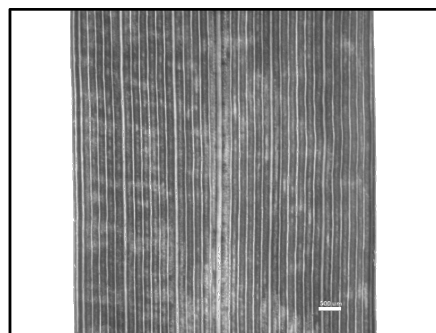



GRMZM2G039934

TDR/PXY LRR RLK

Gene ID: JL63

Foliar expression



Husk expression

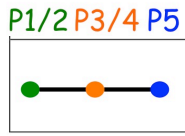

Construct: ZmUBI<sub>pro</sub>:cDNA (ID# 1011)

Thirty five independent T0 lines:  
IR64-IRS1011-001-035

### Genomic PCR

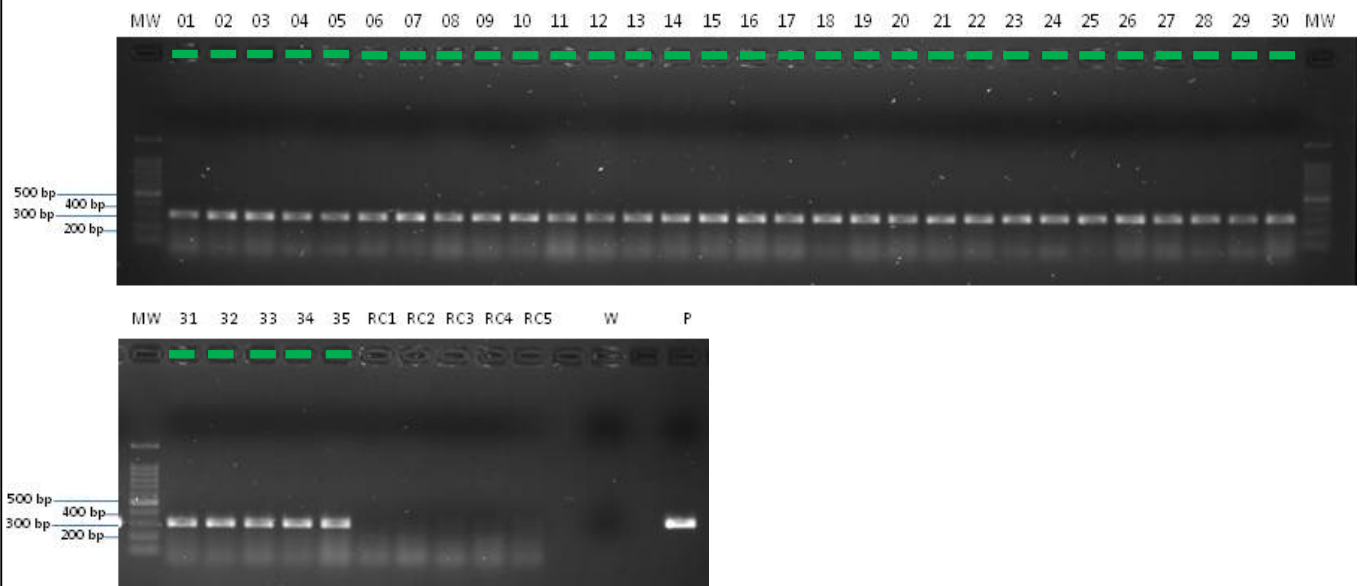

### Number veins versus leaf width

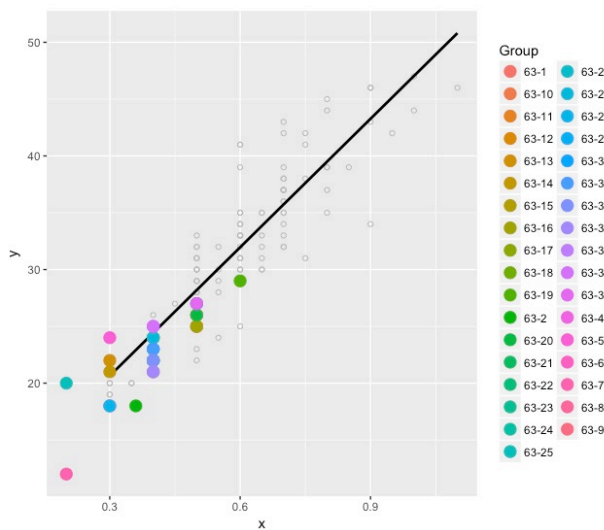

Representative surface image of segregating WT leaf

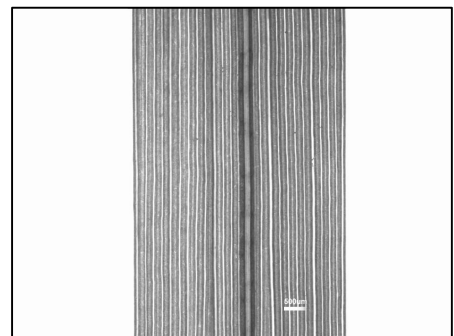

Representative surface image of line 23 leaf

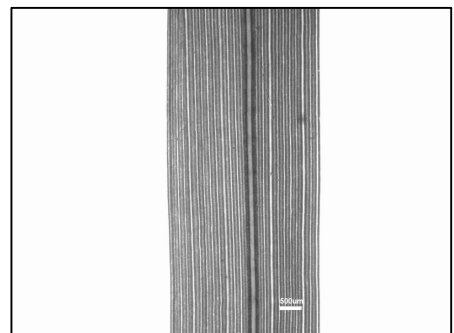

GRMZM2G046316

LRR-RLK

Gene ID: JL64

Foliar expression

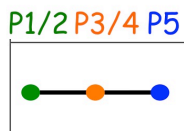

Husk expression

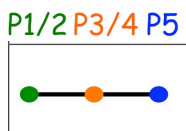

Construct: ZmUBI<sub>pro</sub>:cDNA (ID#1106)

Thirty five independent T0 lines:  
IR64-IRS1106-001-035

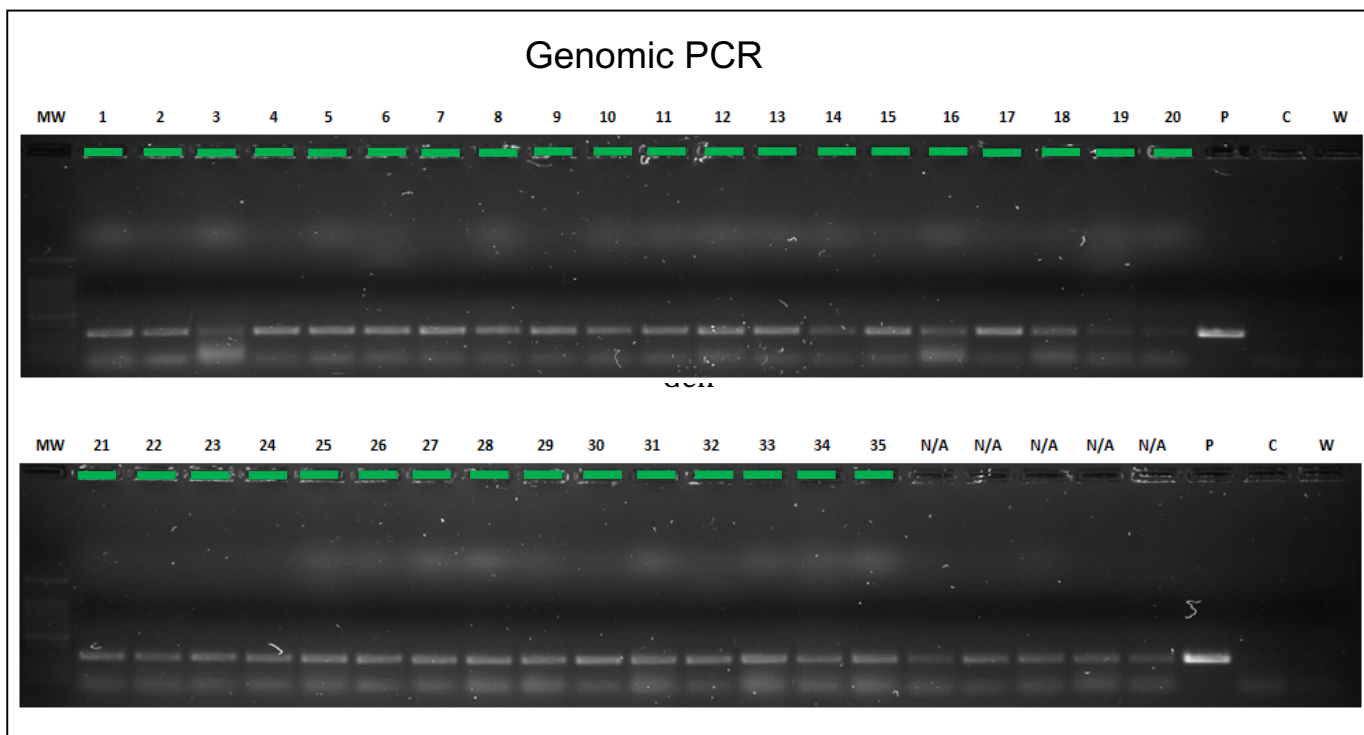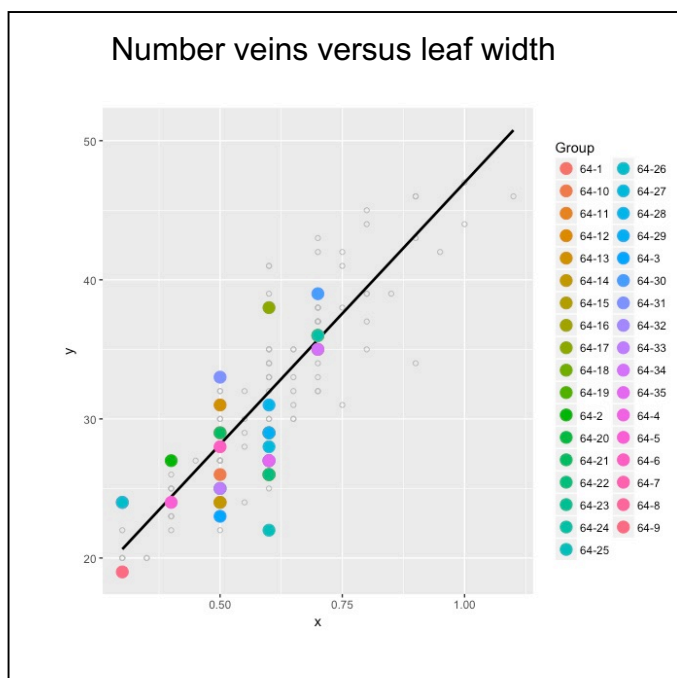

Representative surface image of segregating WT leaf

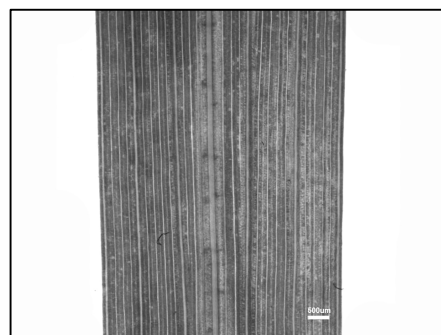

Representative surface image of line 23 leaf

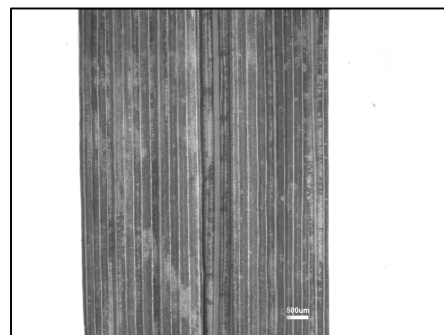

GRMZM2G034155

LRR-RLK

Gene ID: JL65

Foliar expression

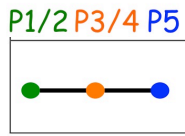

Husk expression

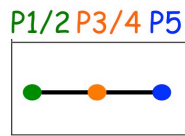

Construct: ZmUBI<sub>pro</sub>:cDNA (ID# 1005)

Thirty five independent T0 lines:  
IR64-IRS1005-001-035

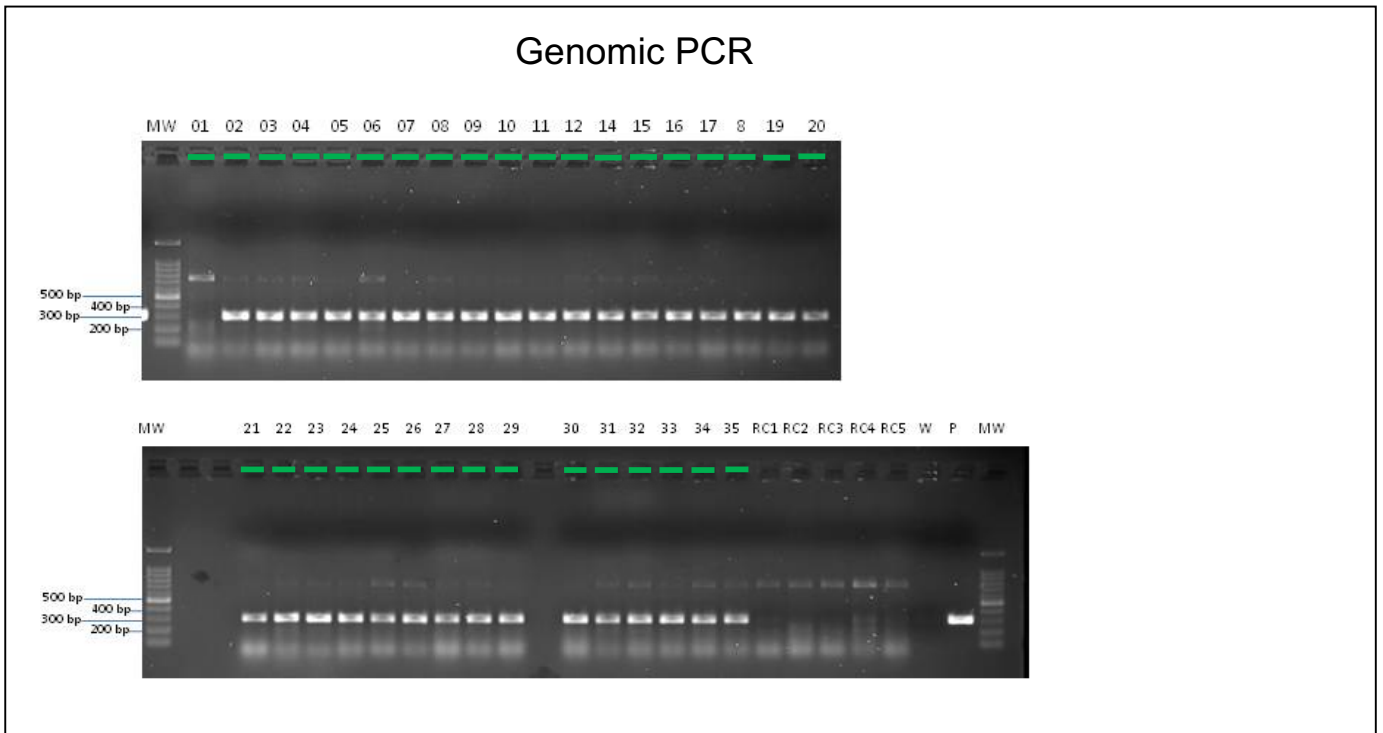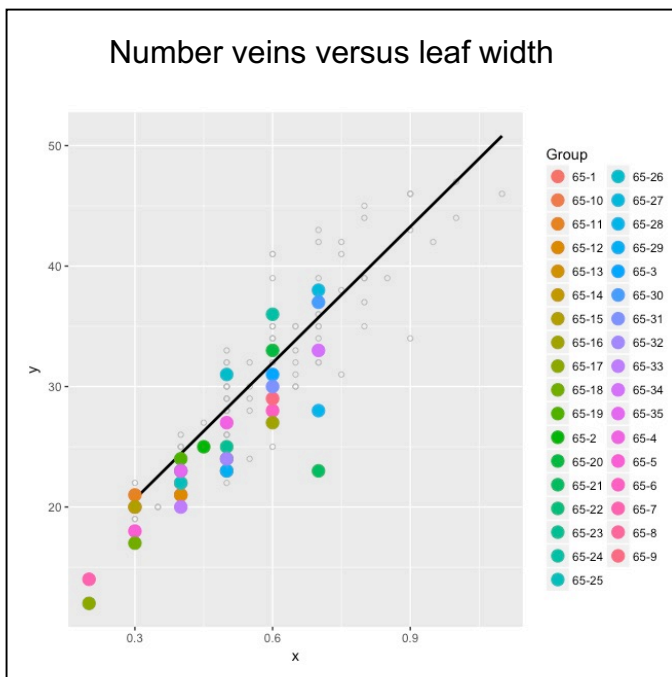

Representative surface image of segregating WT leaf

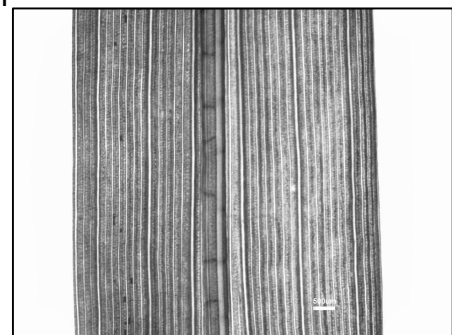

Representative surface image of line 4 leaf

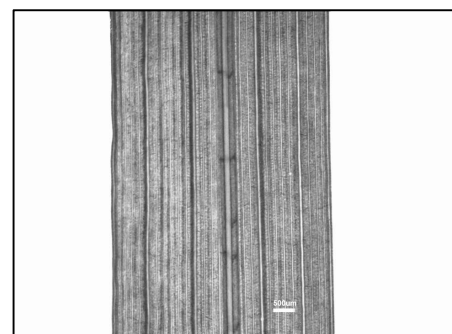

GRMZM2G114276

LRR-RLK

Gene ID: JL66

Foliar expression

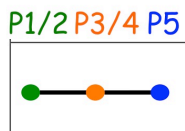

Husk expression



Construct: ZmUBI<sub>pro</sub>:cDNA (ID# 959)

Thirty five independent T0 lines:  
IR64-IRS959-001-035

### Genomic PCR

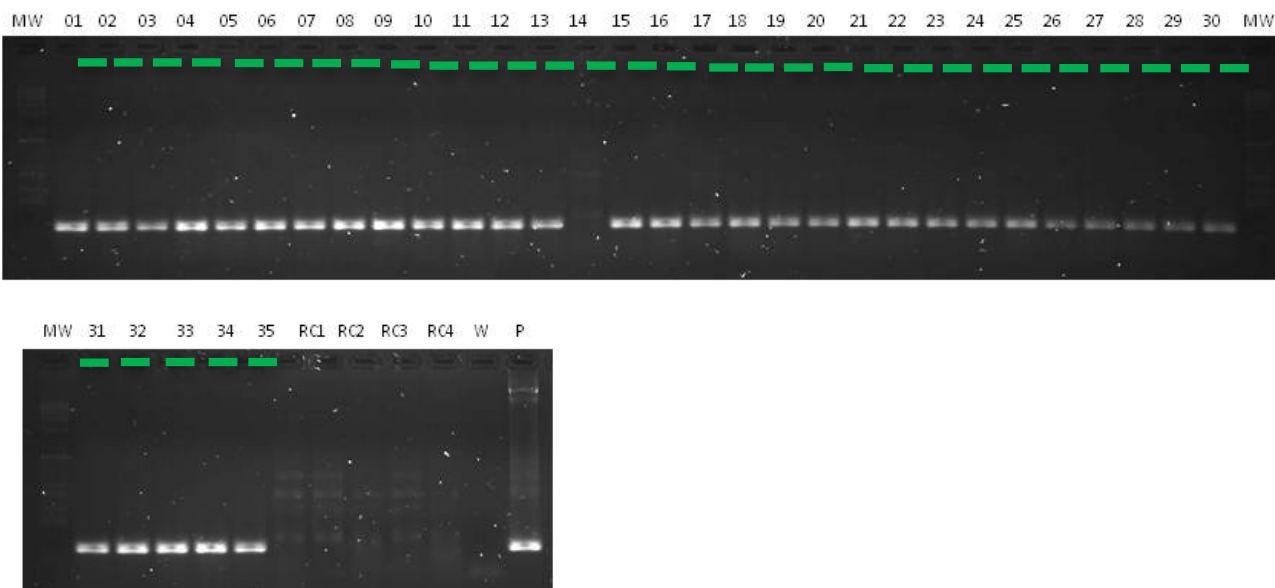

### Number veins versus leaf width

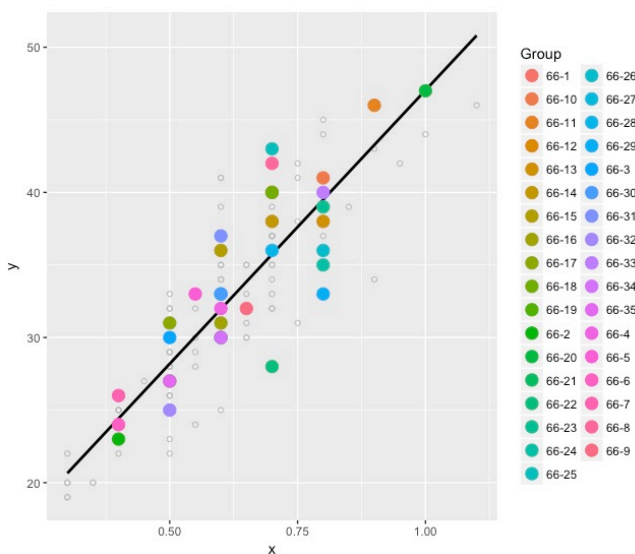

Representative surface image of segregating WT leaf

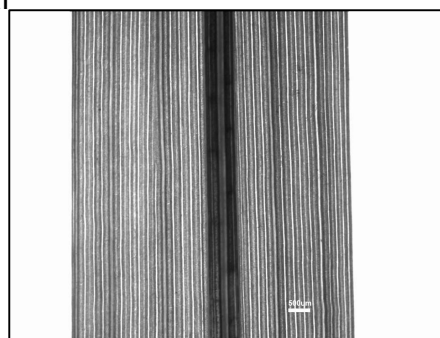

Representative surface image of line 9 leaf

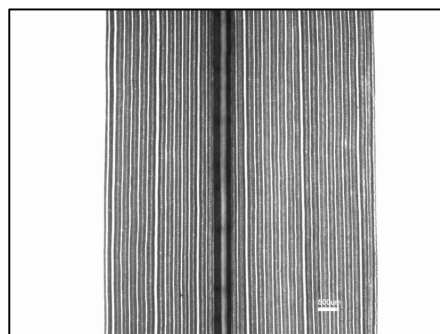

GRMZM2G059117

LRR-RLK

Gene ID: JL67

Foliar expression



Husk expression

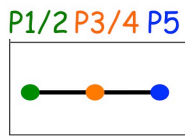

Construct: ZmUBI<sub>pro</sub>:cDNA (ID# 1006)

Thirty four independent T0 lines:  
IR64-IRS1006-001-031, 033-035

### Genomic PCR

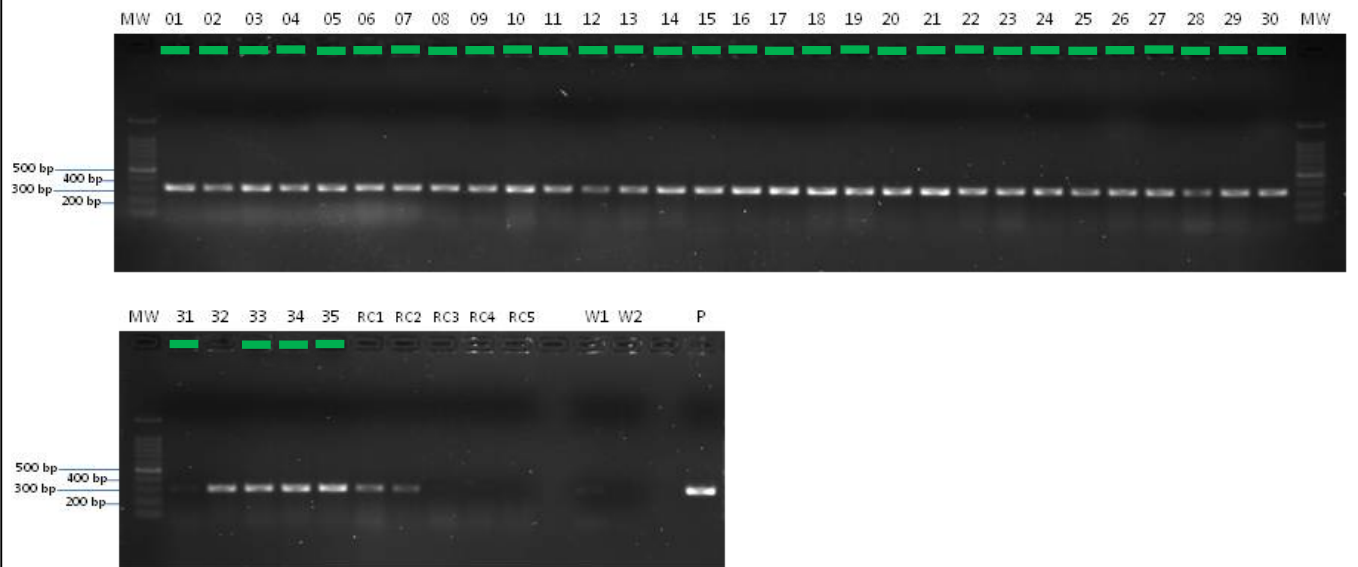

### Number veins versus leaf width

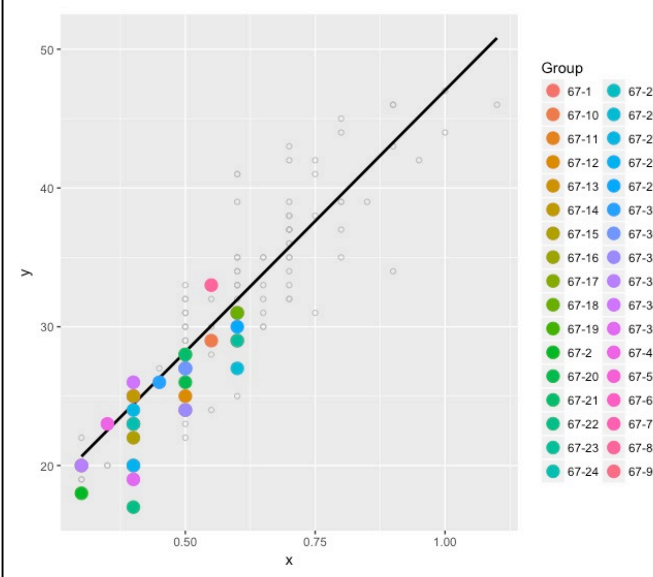

Representative surface image of segregating WT leaf

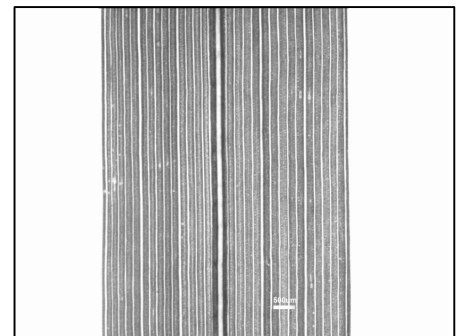

Representative surface image of line 3 leaf

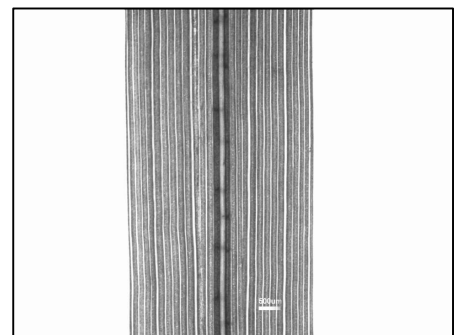

GRMZM2G089819

Brassinosteroid LRR-RLK

Gene ID: JL68

Foliar expression

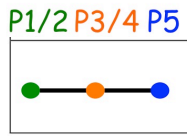

Husk expression



Construct: ZmUBI<sub>pro</sub>:cDNA (ID# 953)

Thirty five independent T0 lines:  
IR64-IRS953-001-035

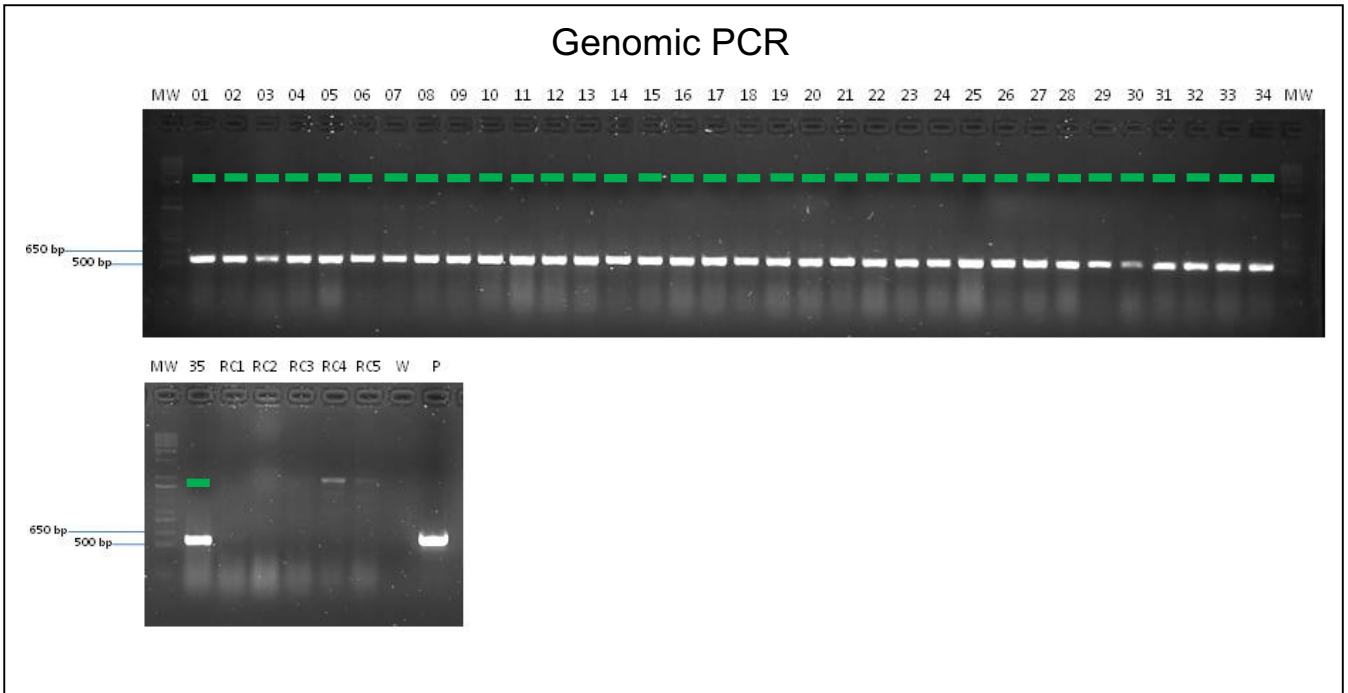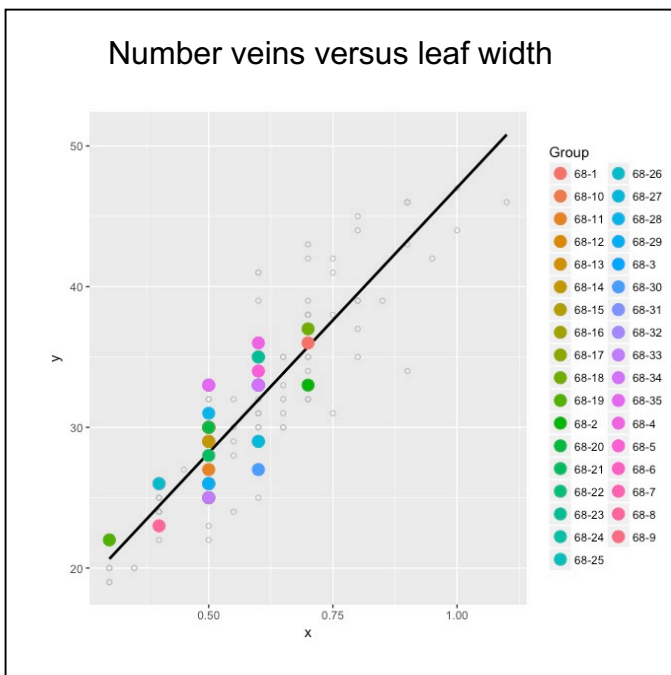

Representative surface image of segregating WT leaf

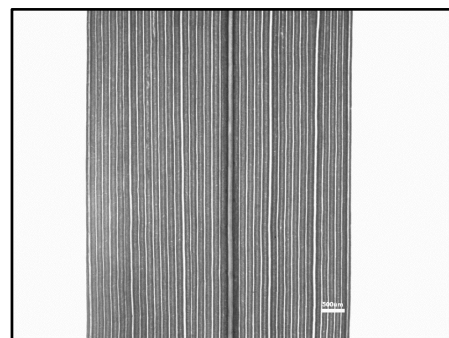

Representative surface image of line 14 leaf

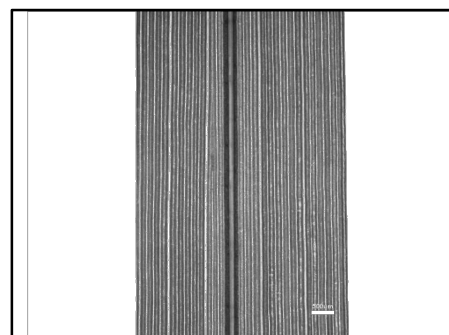

Foliar expression

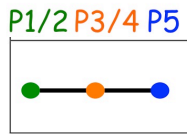

Husk expression

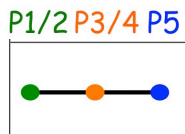

Construct: ZmUBI<sub>pro</sub>:cDNA (ID# 1007)

Thirty five independent T0 lines:  
IR64-IRS1007-001-035

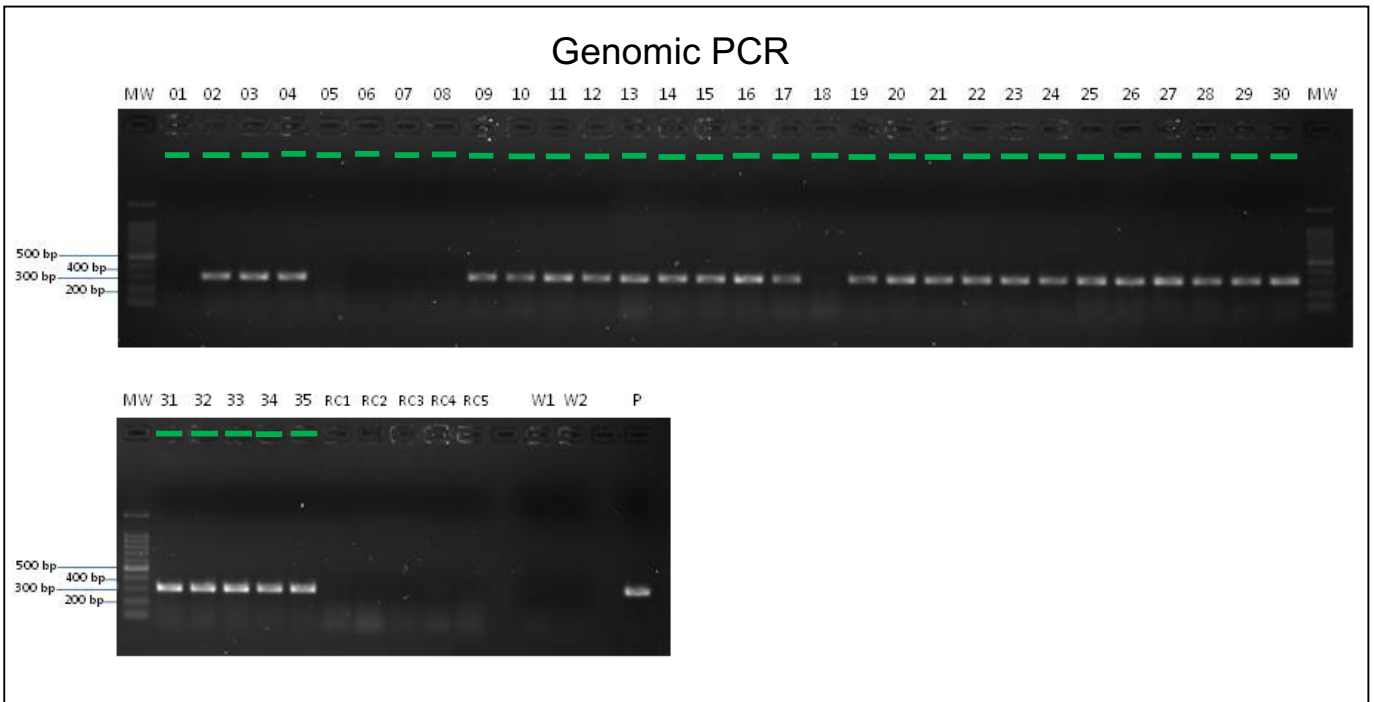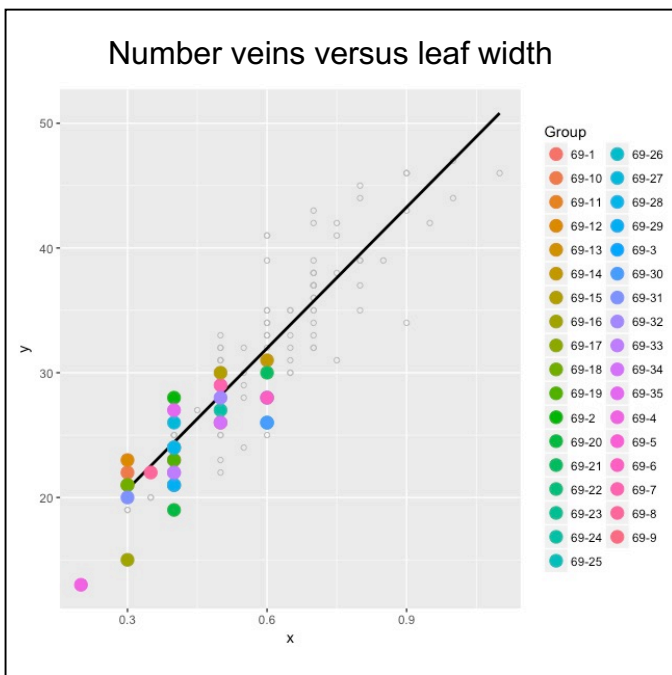

Representative surface image of segregating WT leaf

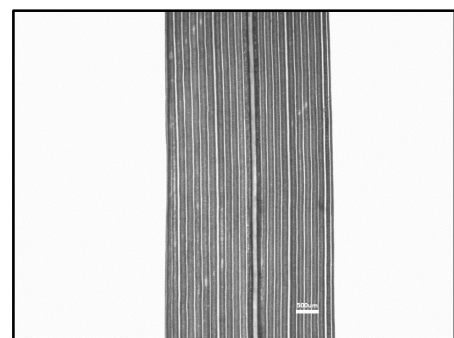

Representative surface image of line 27 leaf

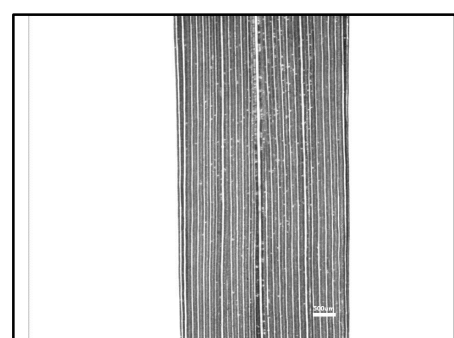

GRMZM2G087243

Armadillo like

Gene ID: JL70

Foliar expression



Husk expression



Construct: ZmUBI<sub>pro</sub>:cDNA (ID# 929)

Thirty four independent T0 lines:  
IR64-IRS929-001-026, 028-035

### Genomic PCR

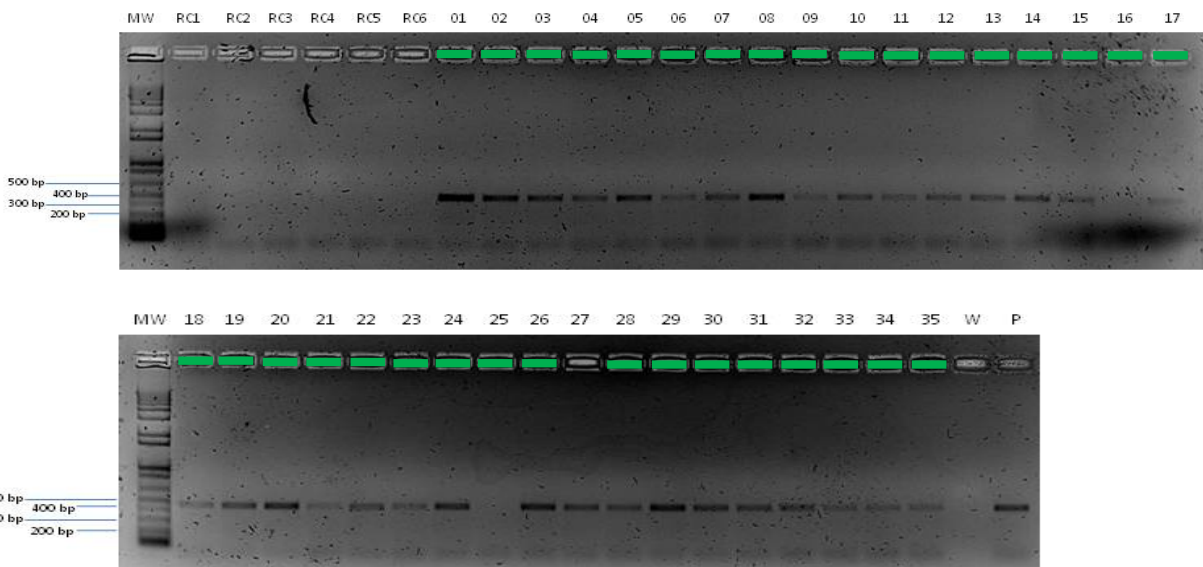

### Number veins versus leaf width

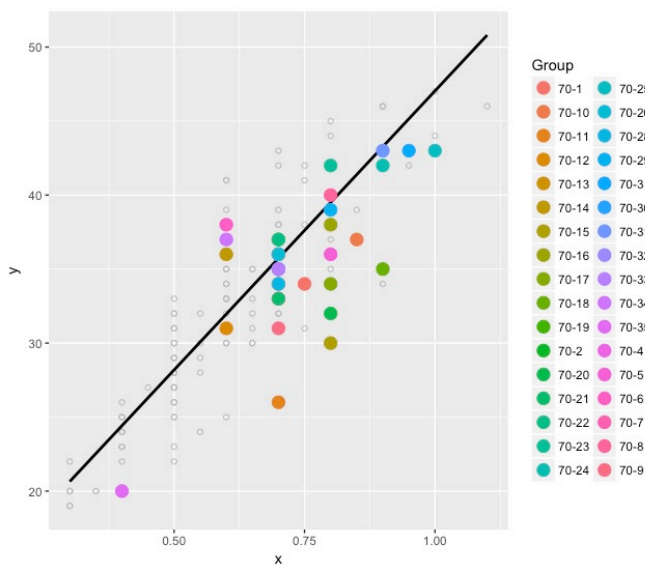

Representative surface image of segregating WT leaf

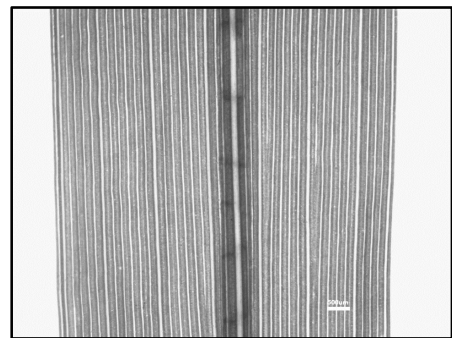

Representative surface image of line 2 leaf

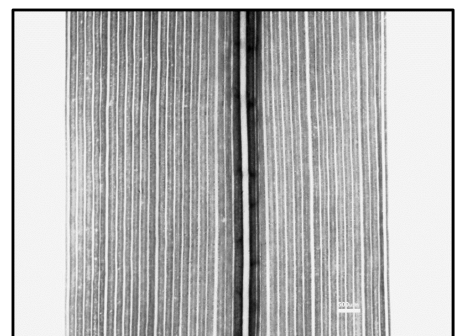



GRMZM2G133716

Forkhead domain

Gene ID: JL71

Foliar expression

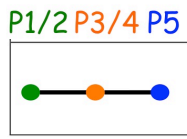

Husk expression

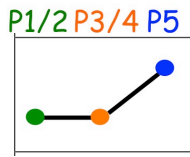

Construct: ZmUBI<sub>pro</sub>:cDNA (ID# 986)

Twenty nine independent T0 lines:

IR64-IRS986-001-009,011,012,014,016,017,020-027,029,030,031-035

### Genomic PCR

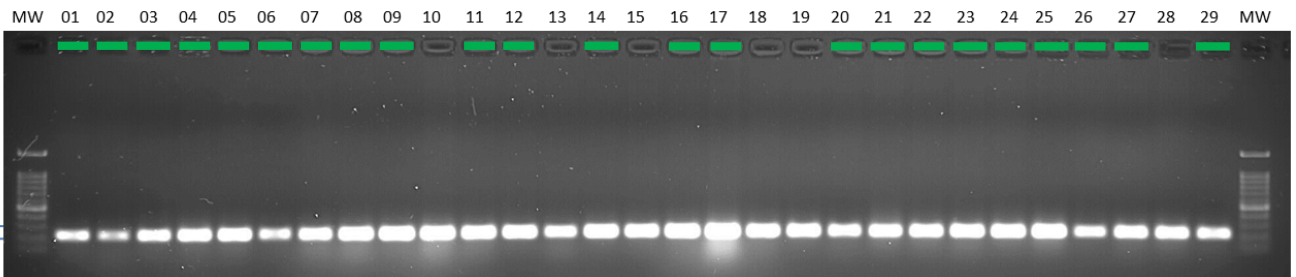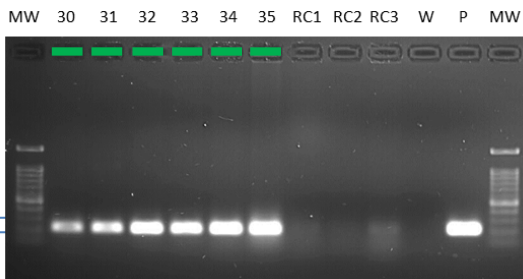

### Number veins versus leaf width

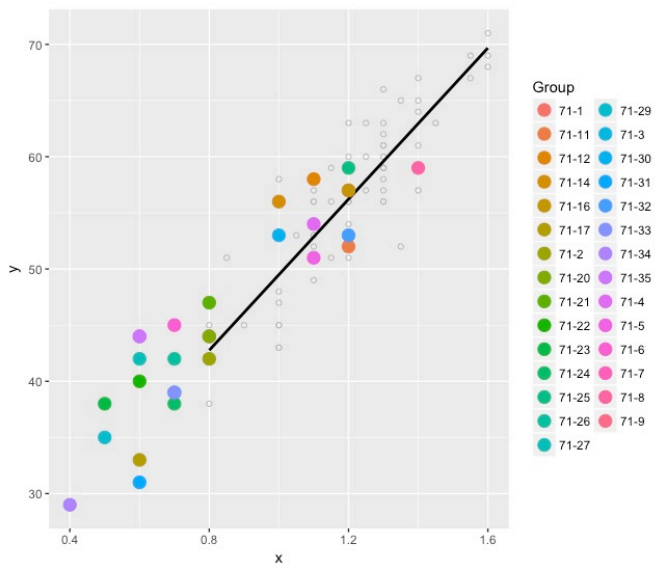

Representative surface image of segregating WT leaf

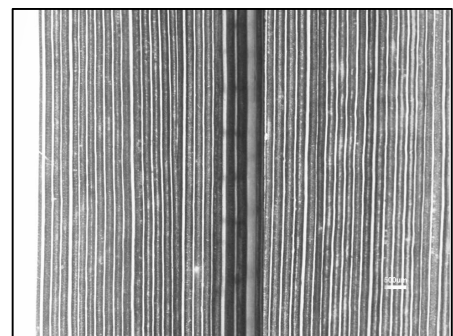

Representative surface image of line 21 leaf

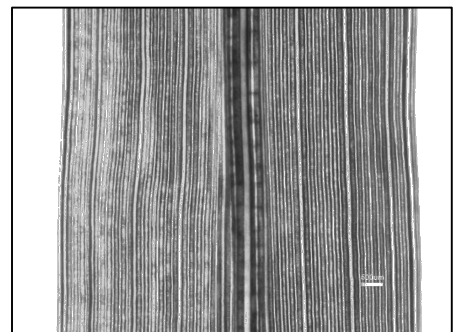

GRMZM2G469304

Ternary complex factor

Gene ID: JL72

Foliar expression

P1/2 P3/4 P5

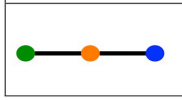

Husk expression

P1/2 P3/4 P5

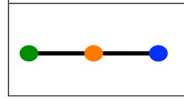

Construct: ZmUBI<sub>pro</sub>:cDNA (ID# 1008)

Thirty five independent T0 lines:  
IR64-IRS1008-001-035

### Genomic PCR

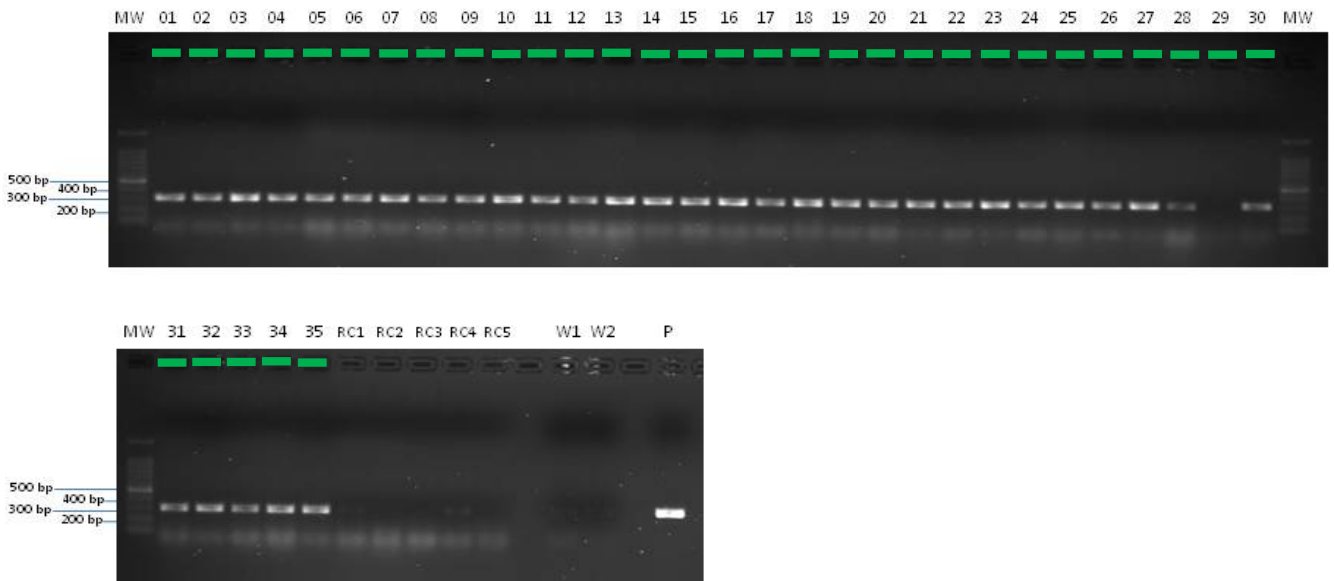

### Number veins versus leaf width

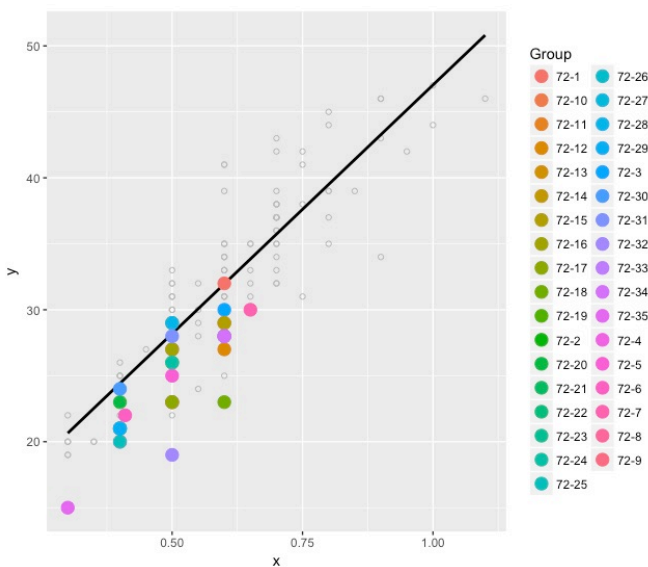

Representative surface image of segregating WT leaf

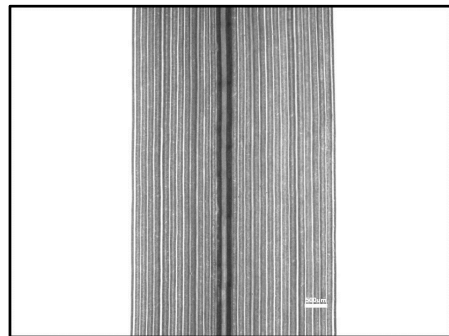

Representative surface image of line 5 leaf

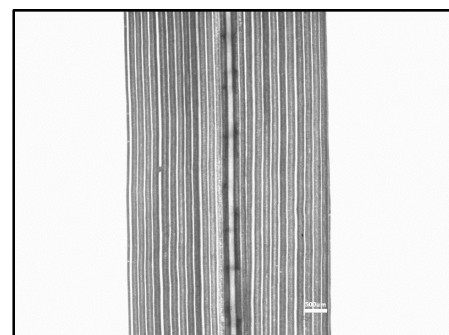

GRMZM5G850129

Growth regulatory factor

Gene ID: JL75

Foliar expression

P1/2 P3/4 P5

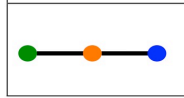

Husk expression

P1/2 P3/4 P5

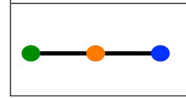

Construct: ZmUBI<sub>pro</sub>:cDNA (ID# 948)

Five independent T0 lines:

IR64-IRS948-009,022,024,026,028

### Genomic PCR

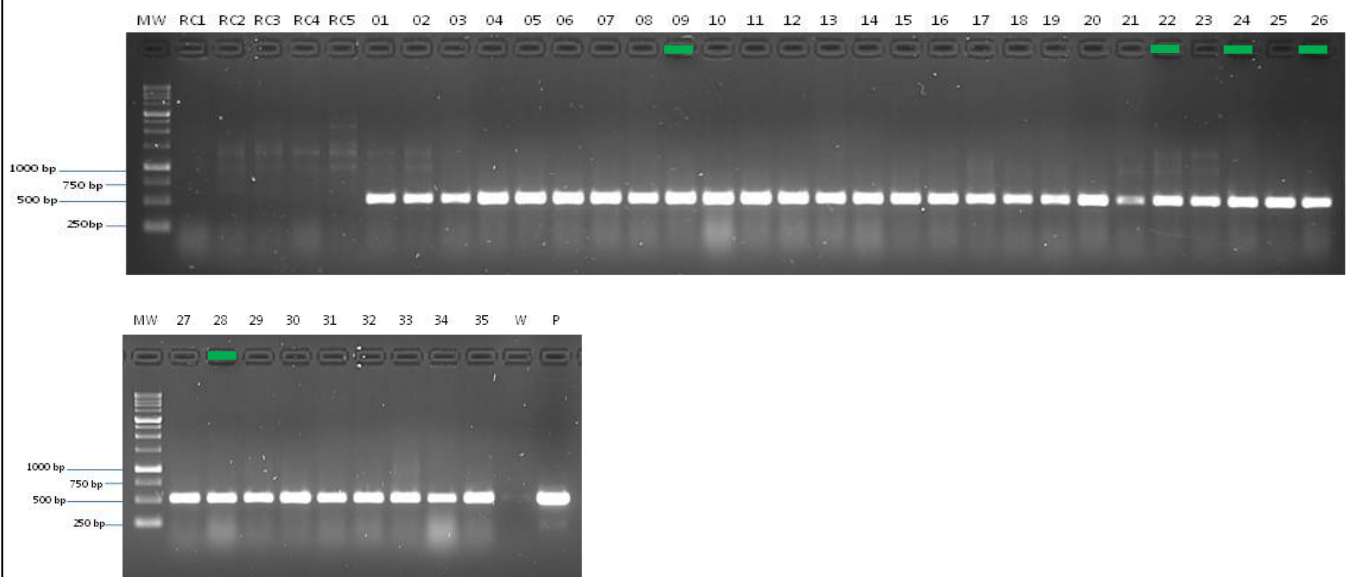

### Number veins versus leaf width

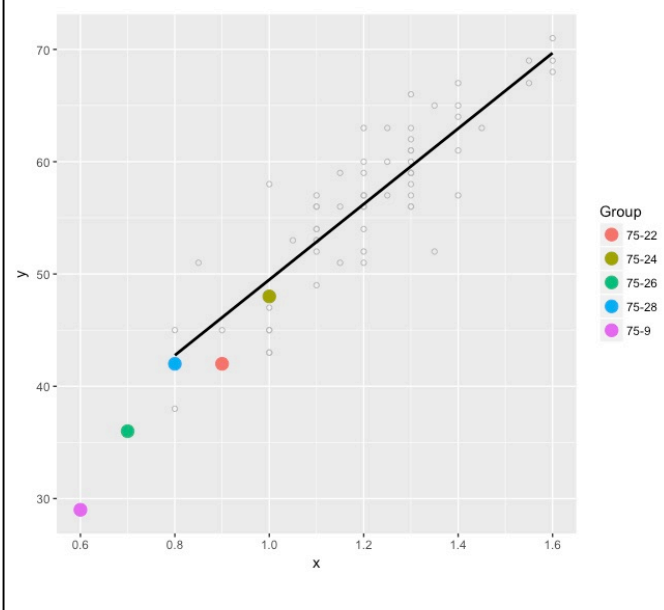

Representative surface image of segregating WT leaf

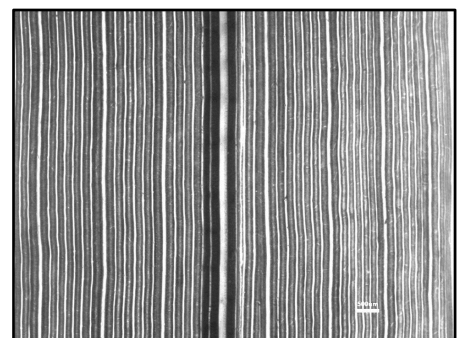

Representative surface image of line 22 leaf

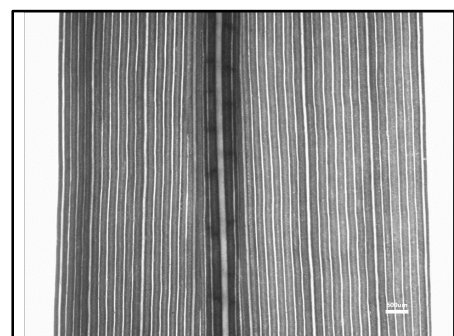

GRMZM2G061734

SBP domain TF

Gene ID: JL76

Foliar expression

P1/2 P3/4 P5

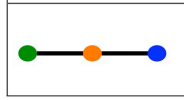

Husk expression

P1/2 P3/4 P5

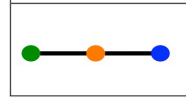

Construct: ZmUBI<sub>pro</sub>:cDNA (ID# 960)

Thirteen independent T0 lines:

IR64-IRS960-002,006,007,011,012,017,018,020,022,025,031,033,034

### Genomic PCR

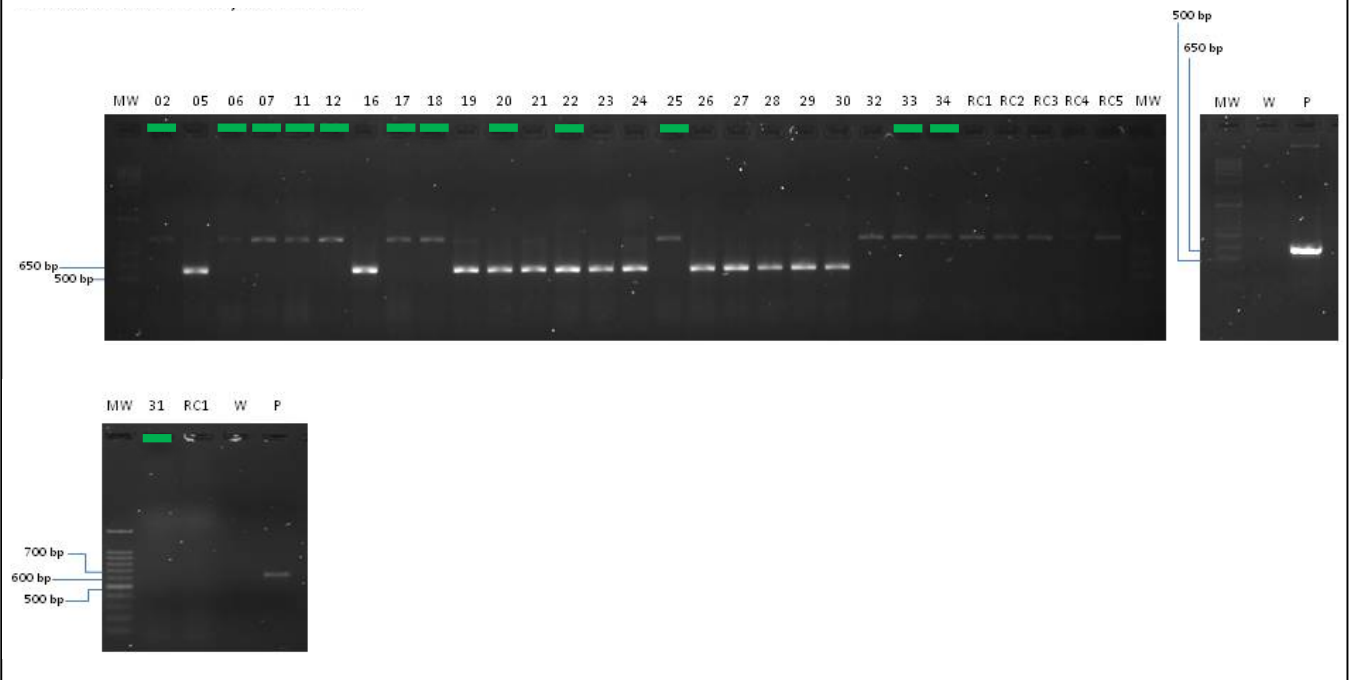

### Number veins versus leaf width

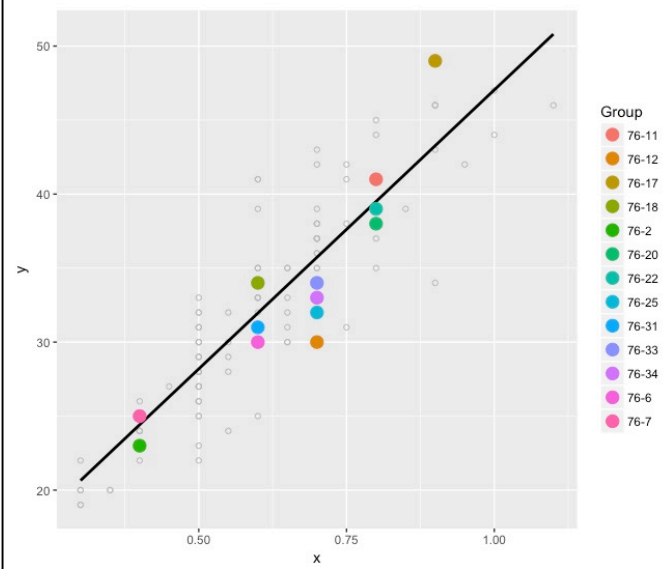

Representative surface image of segregating WT leaf

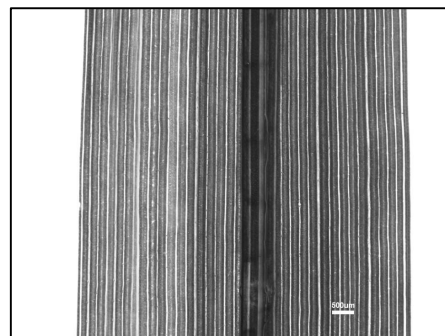

Representative surface image of line 34 leaf

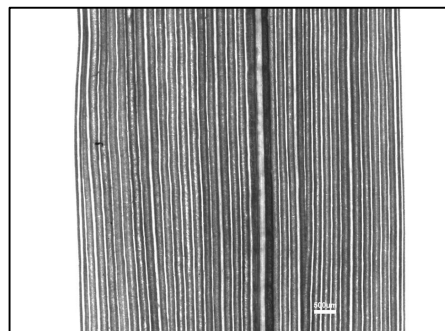

GRMZM2G318592

ZnF C2H2

Gene ID: JL77

Foliar expression

P1/2 P3/4 P5

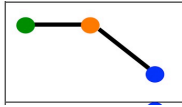

Husk expression

P1/2 P3/4 P5

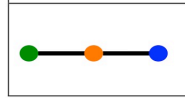

Construct: ZmUBI<sub>pro</sub>:cDNA (ID# 1009)

Thirty five independent T0 lines:  
IR64-IRS1009-001-035

### Genomic PCR

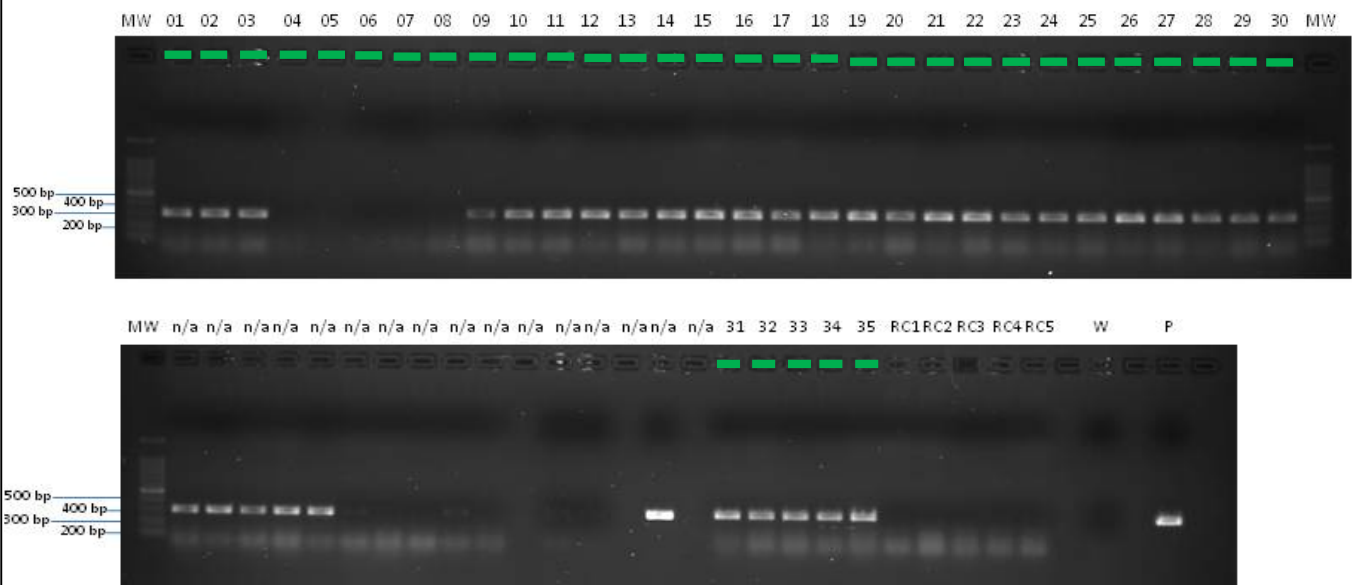

### Number veins versus leaf width

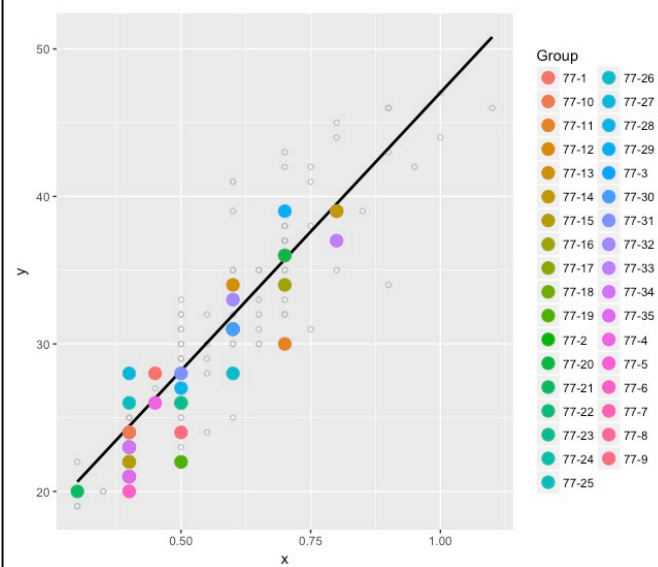

Representative surface image of segregating WT leaf

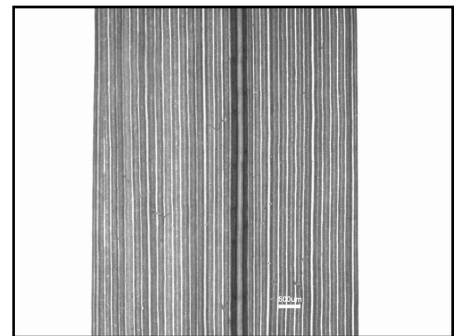

Representative surface image of line 3 leaf

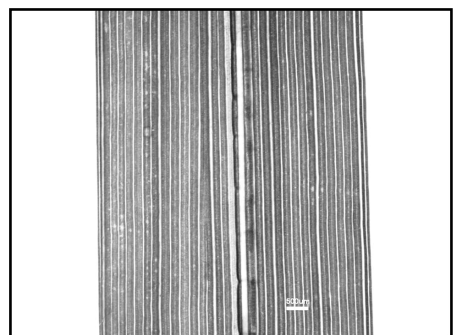

GRMZM2G095899

bHLH

Gene ID: JL78

Foliar expression

P1/2 P3/4 P5

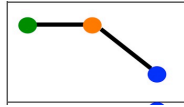

Husk expression

P1/2 P3/4 P5

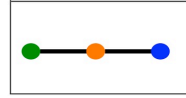

Construct: ZmUBI<sub>pro</sub>:cDNA (ID# 942)

Ten independent T0 lines:

IR64-IRS942-001,003,004,007,009,010,012,013,018,019

### Genomic PCR

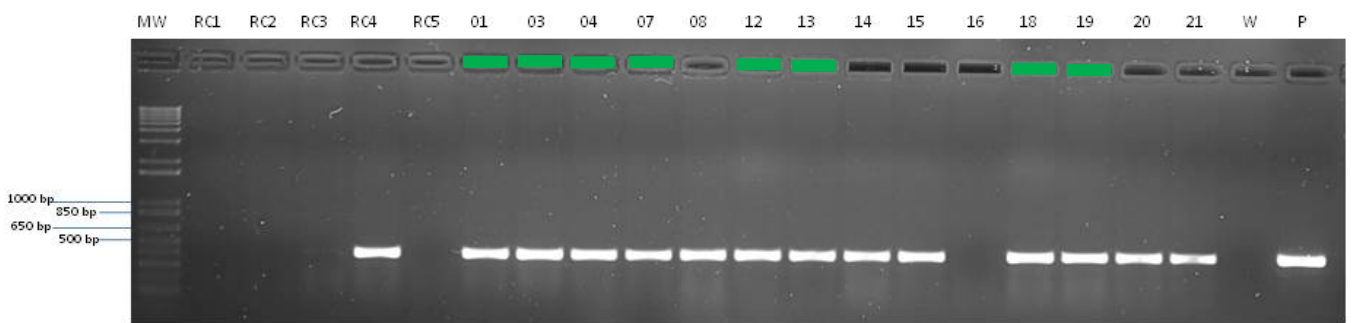

### Number veins versus leaf width

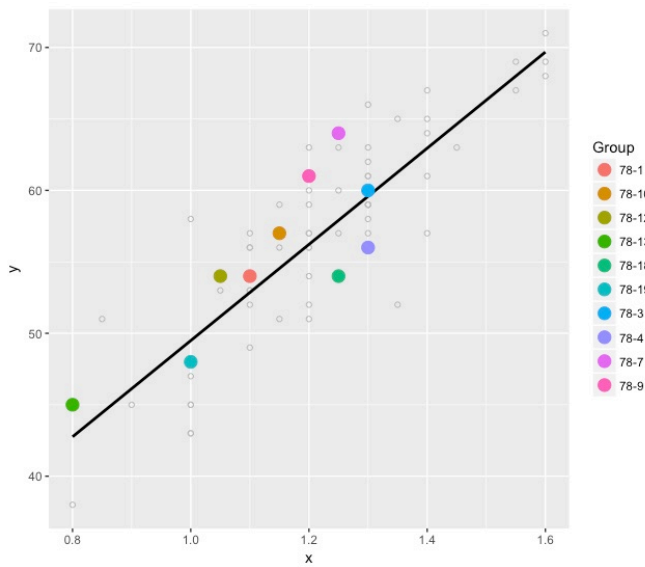

Representative surface image of segregating WT leaf

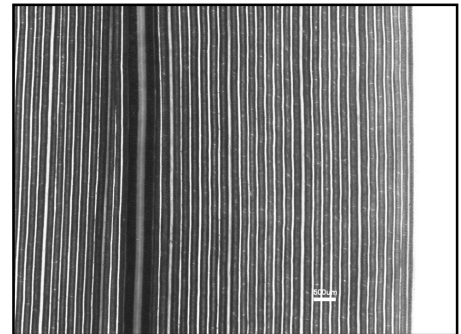

Representative surface image of line 10 leaf

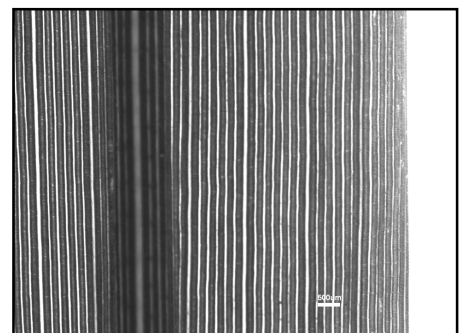

GRMZM2G015666

bHLH

Gene ID: JL79

Foliar expression

P1/2 P3/4 P5



Husk expression

P1/2 P3/4 P5

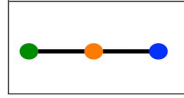

Construct: ZmUBI<sub>pro</sub>:cDNA (ID# 946)

Thirty five independent T0 lines:  
IR64-IRS946-001-035

### Genomic PCR

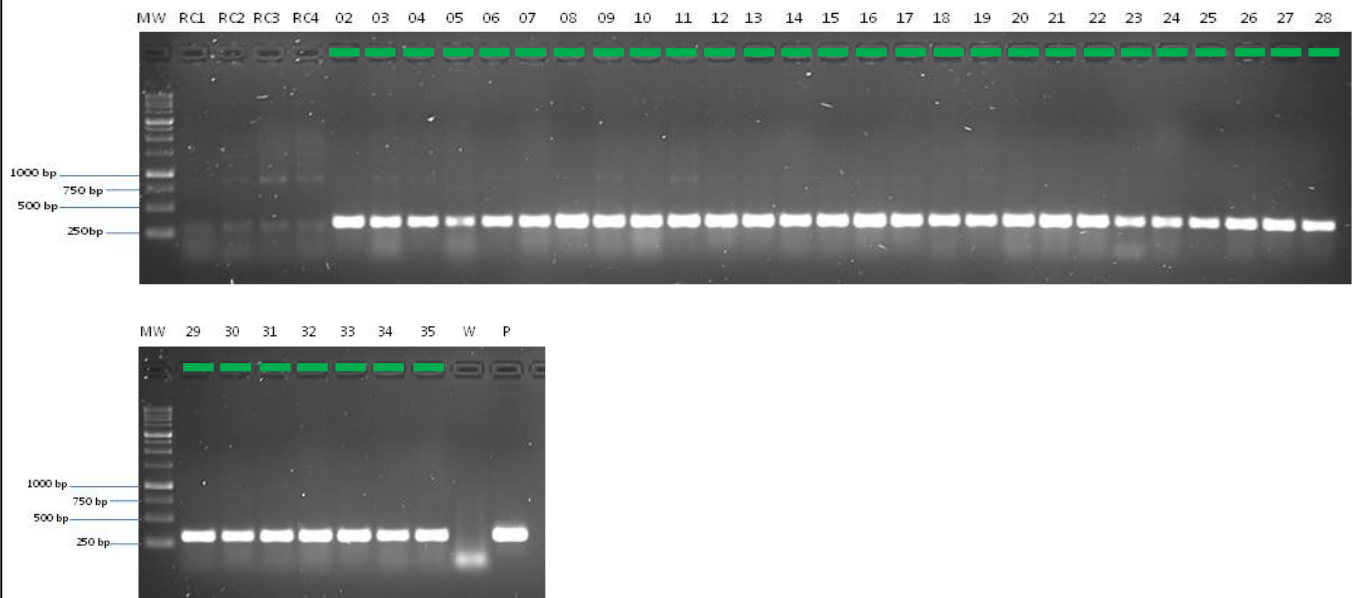

### Number veins versus leaf width

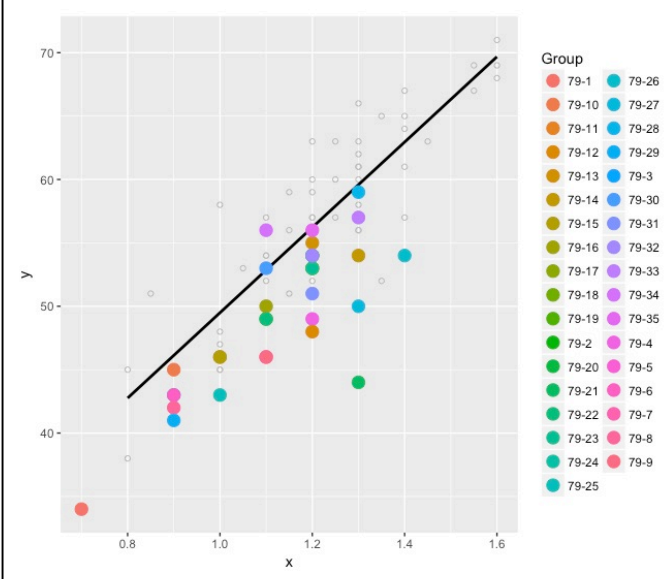

Representative surface image of segregating WT leaf

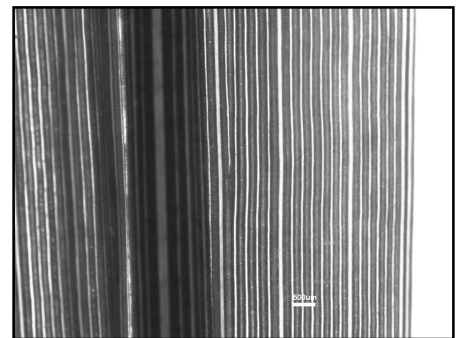

Representative surface image of line 2 leaf

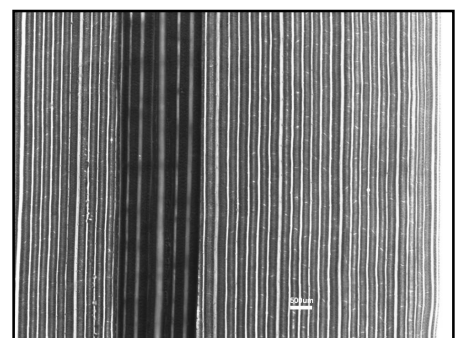

GRMZM2G126018

SBP domain TF

Gene ID: JL80

Foliar expression

P1/2 P3/4 P5



Husk expression

P1/2 P3/4 P5



Construct: ZmUBI<sub>pro</sub>:cDNA (ID# 954)

Twenty seven independent T0 lines:

IR64-IRS954-001-004,007,010,012,014-018,020-025,027,028,031,032,034-039

### Genomic PCR

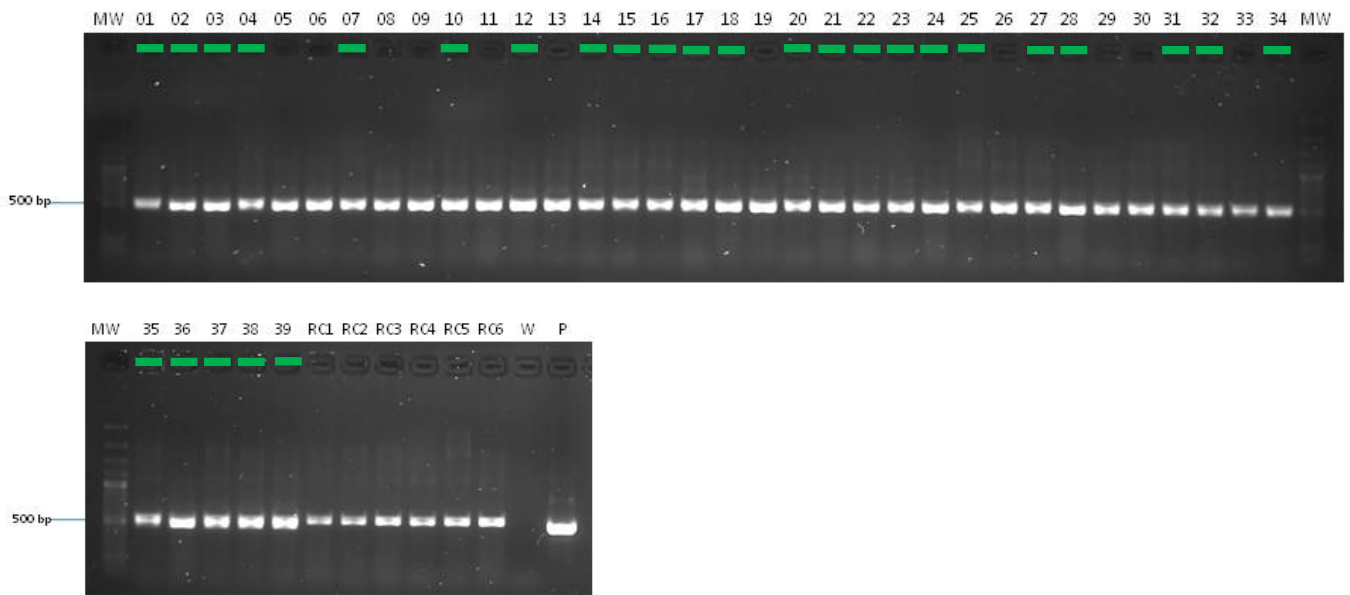

### Number veins versus leaf width

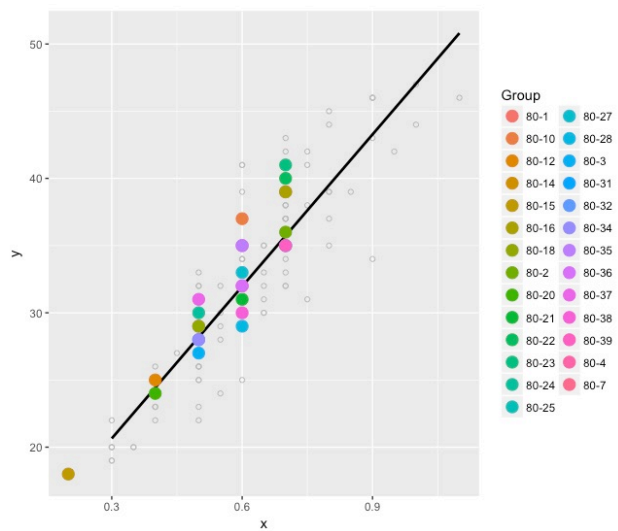

Representative surface image of segregating WT leaf

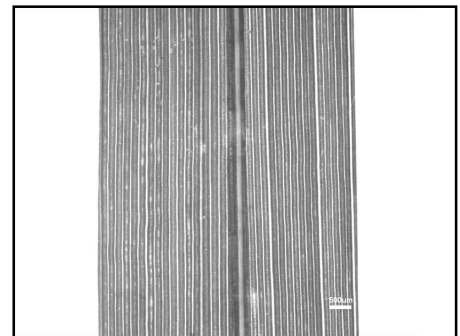

Representative surface image of line 21 leaf

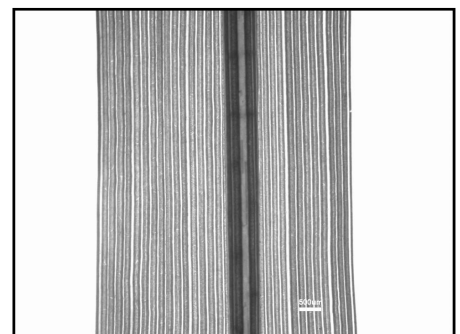



GRMZM2G312419

R2R3 Myb

Gene ID: JL81

Foliar expression

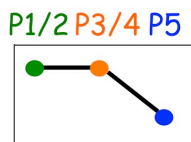

Husk expression

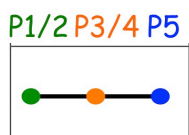

Construct: ZmUBI<sub>pro</sub>:cDNA (ID# 961)

Seventeen independent T0 lines:  
IR64-IRS961-001-017

### Genomic PCR

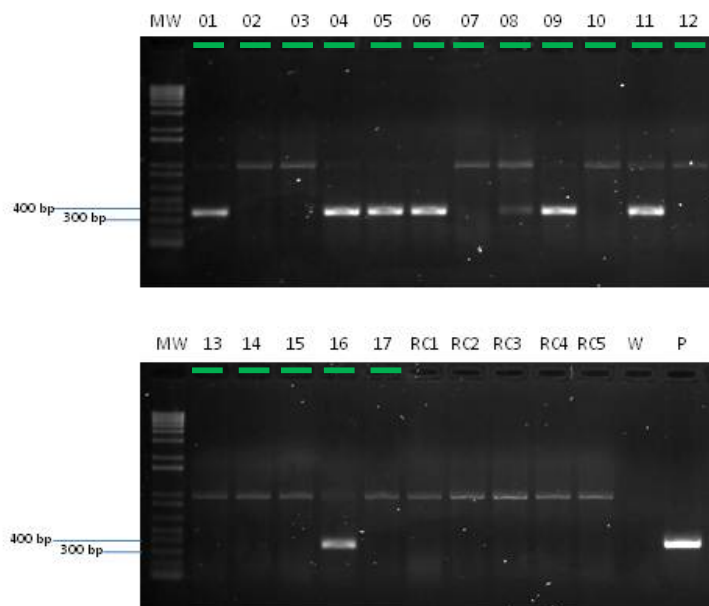

### Number veins versus leaf width

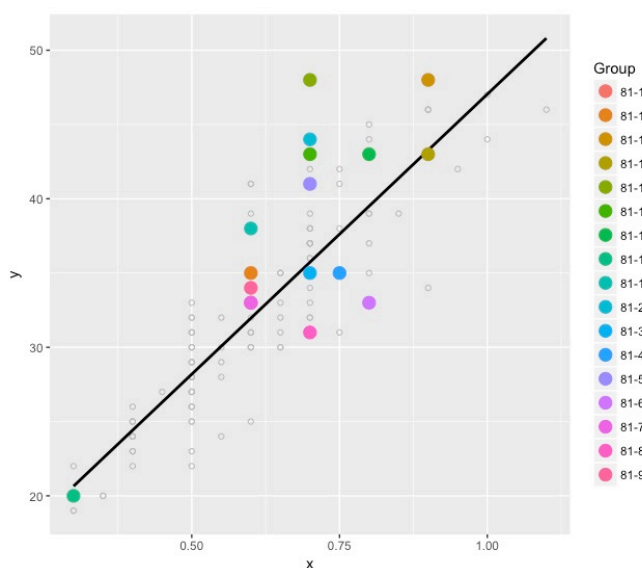

Representative surface image of segregating WT leaf

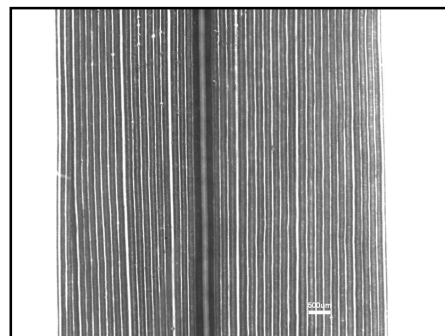

Representative surface image of line 5 leaf

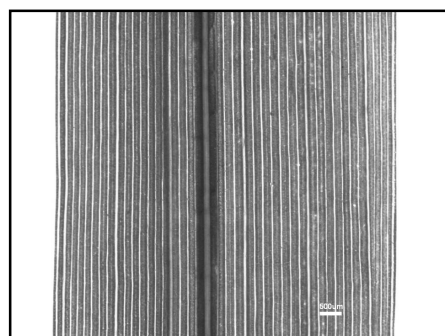

GRMZM2G478876

Serine threonine kinase

Gene ID: JL82

Foliar expression

P1/2 P3/4 P5



Husk expression

P1/2 P3/4 P5



Construct: ZmUBI<sub>pro</sub>:cDNA (ID# 940)

Thirty one independent T0 lines:  
IR64-IRS940-003-016,018,019,021-035

### Genomic PCR

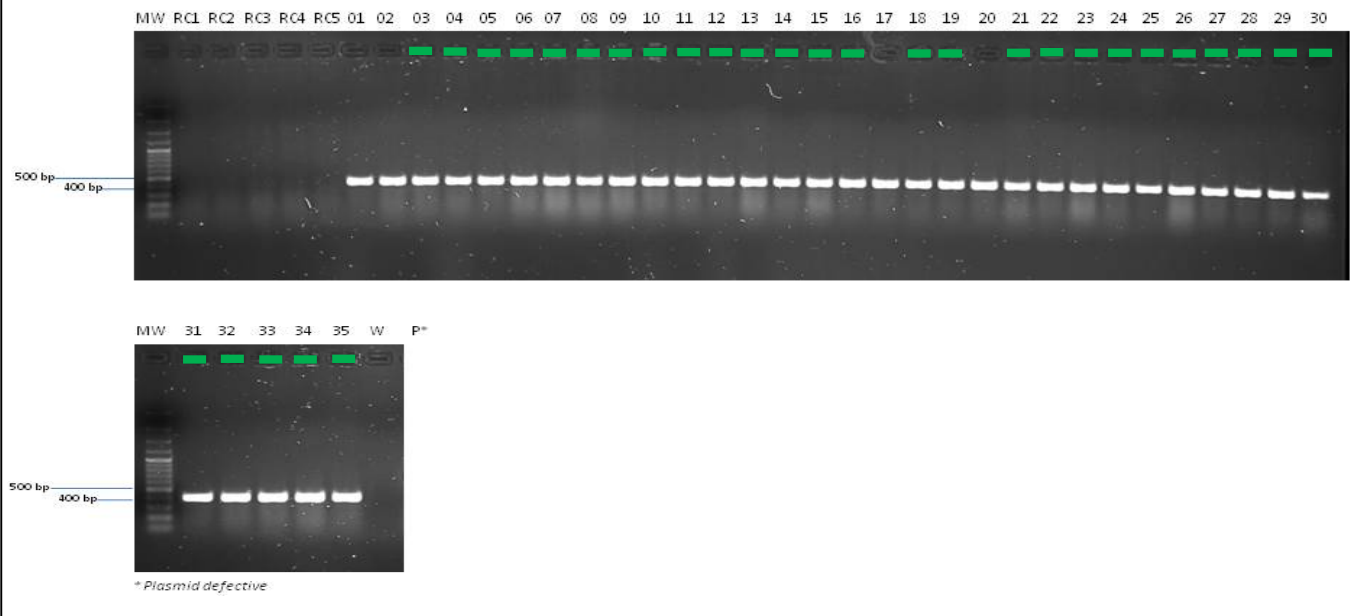

### Number veins versus leaf width

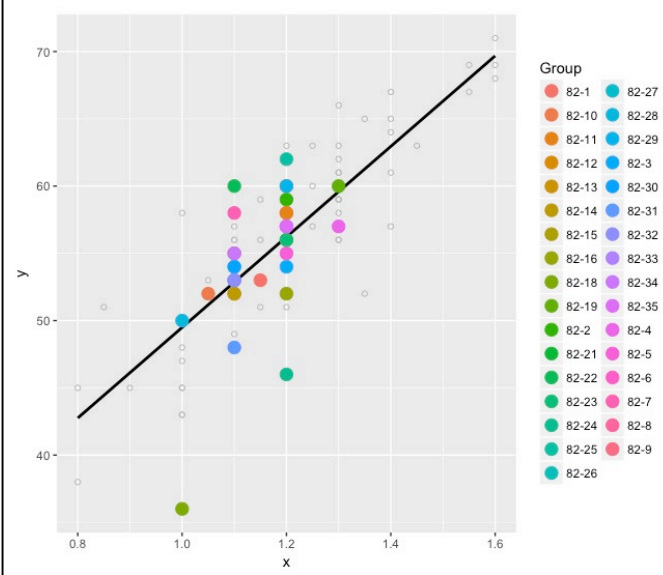

Representative surface image of segregating WT leaf

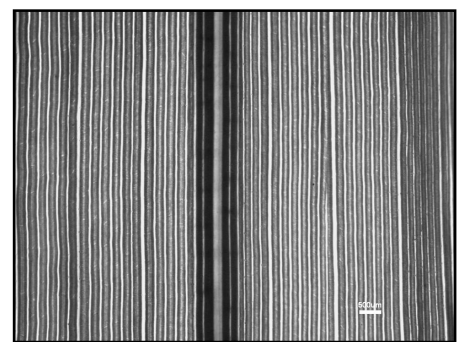

Representative surface image of line 21 leaf

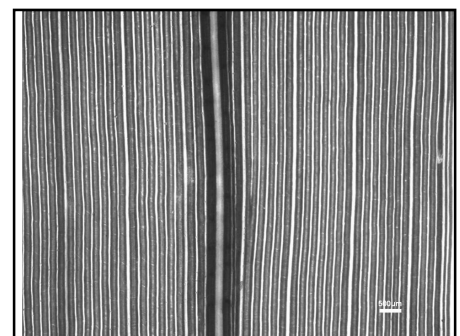

**Information S3.** Individual datasheets for T1 rice lines summarized in Dataset S3. Each page shows the gene expression profile in maize foliar and husk leaf primordia as reported in <sup>19</sup> (green circles refer to relative expression level in samples of the shoot apical meristem plus plastochron 1/2 leaf primordia, orange circles to levels in P3/4 leaf primordia and blue circles to levels in P5 leaf primordia); construct composition and ID; number and ID of independent transgenic rice lines. Where available, cropped agarose gel images show PCR products of representative genomic PCR reactions (detecting presence of transgene) and RT-PCR reactions (detecting transgene transcripts). qRT-PCR data are shown for one construct. Polynomial (Kitaake lines) or linear (IR64 lines) regression plots illustrate number of veins versus leaf width in each line. Representative leaf samples (either hand cut transverse leaf sections viewed by fluorescence microscopy or views of the adaxial leaf surface taken using a hand-held microscope) are shown in each case. Fluorescence images are visualized through autofluorescence of chlorophyll (red) and lignin (blue).

GRMZM2G028046

MYB-interacting protein (ZmMIL1)

Gene ID: JL2

Foliar expression

Husk expression

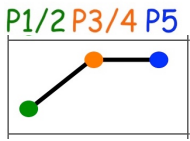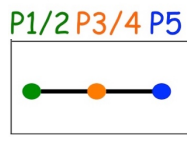

Construct: ZmUBI<sub>pro</sub>:cDNA (ID# 76CC)

Two independent T1 lines:

ZmMIL1-1 (76CCS1 – 8 individuals)

ZmMIL1-2 (76CCS2 – 7 individuals)

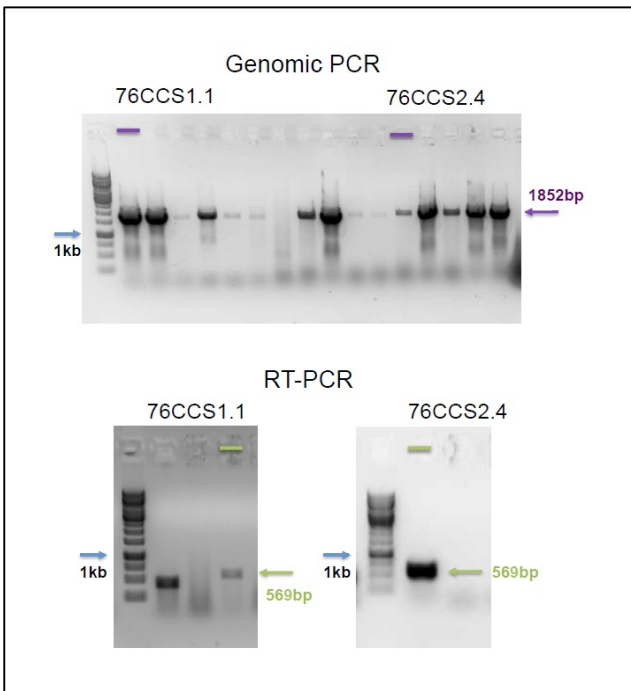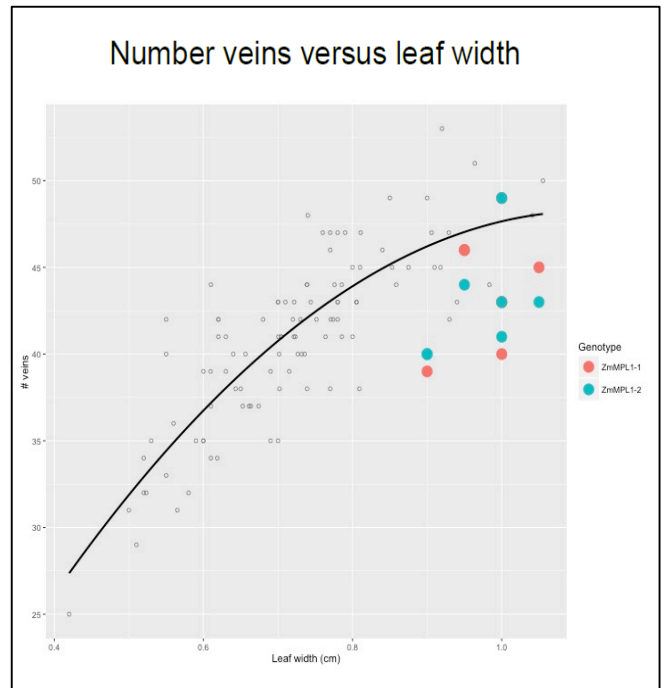

Representative leaf cross sections:

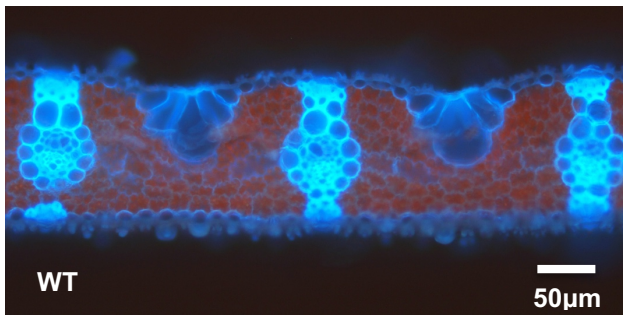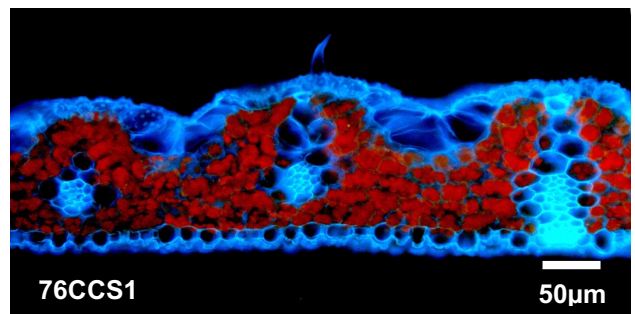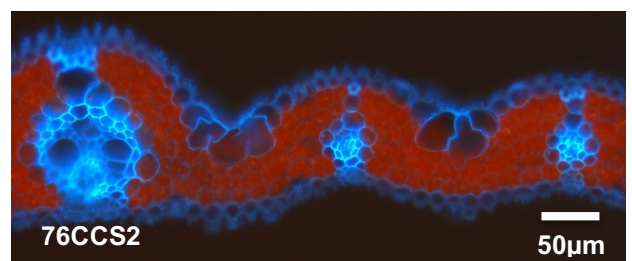

GRMZM2G136494

MYB-interacting protein (ZmMIL2)

Gene ID: JL3

Foliar expression

Husk expression

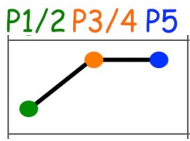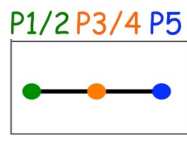

Construct: ZmUBI<sub>pro</sub>:cDNA (ID# 84CC)

Three independent T1 lines:

ZmMIL2-1 (84CCSR1 – 7 individuals)

ZmMIL2-2 (84CCS201 – 6 individuals)

ZmMIL2-3 (84CCS204 – 2 individuals)

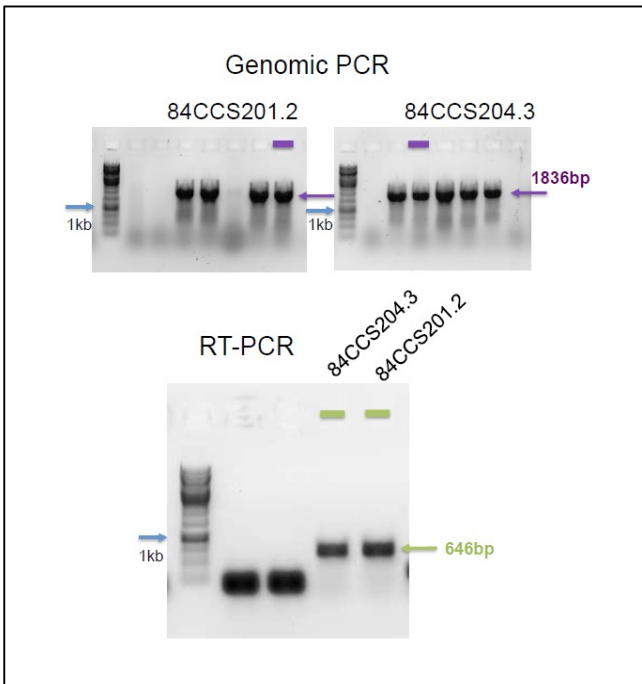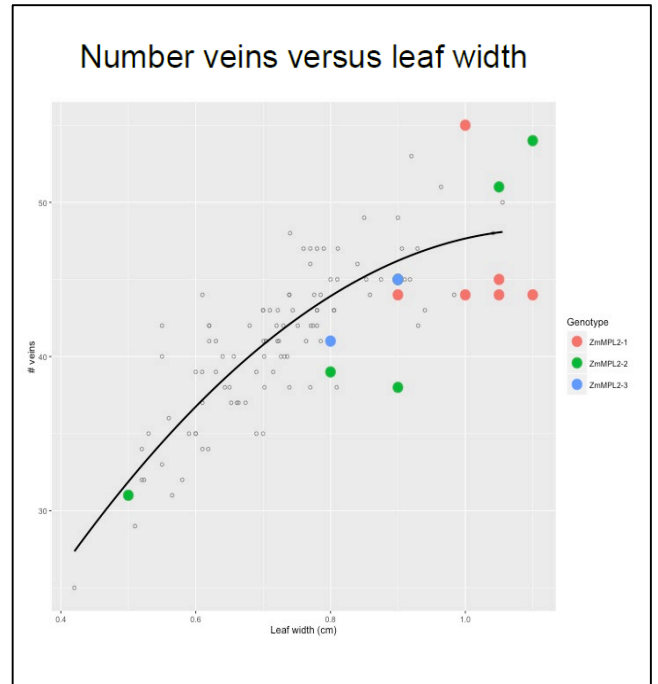

Representative leaf cross sections:

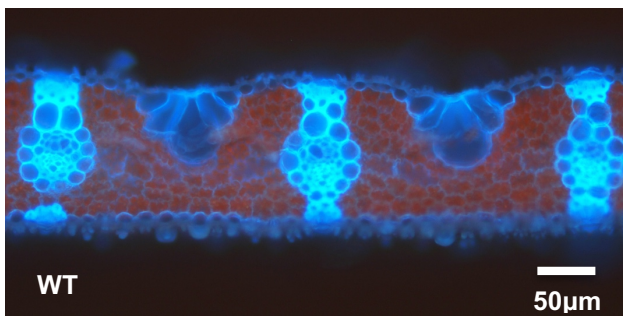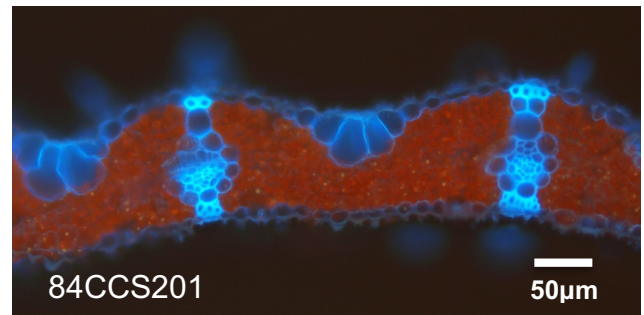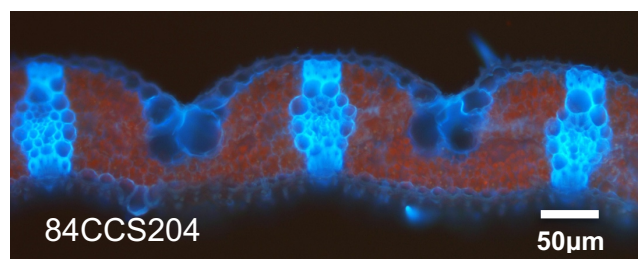

GRMZM2G045883

bHLH (ZmSPL1)

Gene ID: JL4

Foliar expression

Husk expression

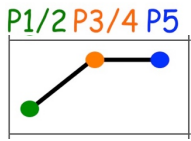

Construct: ZmUBI<sub>pro</sub>:cDNA (ID# 79CC)

Two independent T1 lines:

ZmSPL1-1 (79CCSR16 – 1 individual)

ZmSPL1-2 (79CCSR21 – 3 individuals)

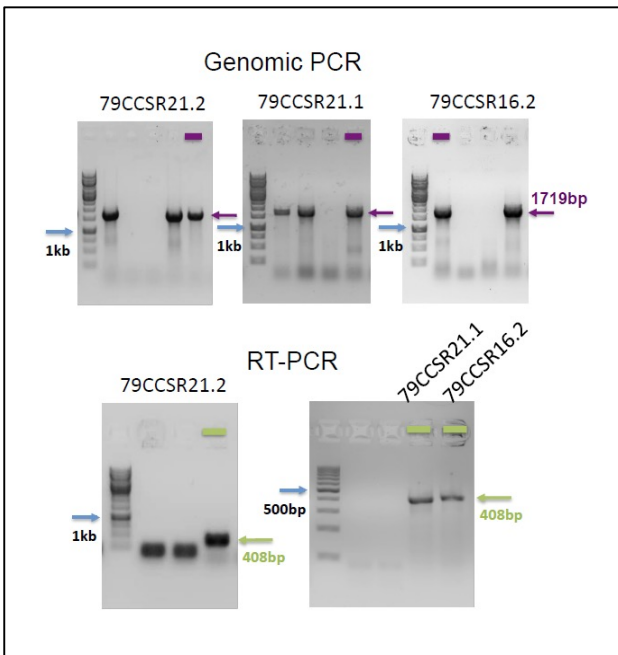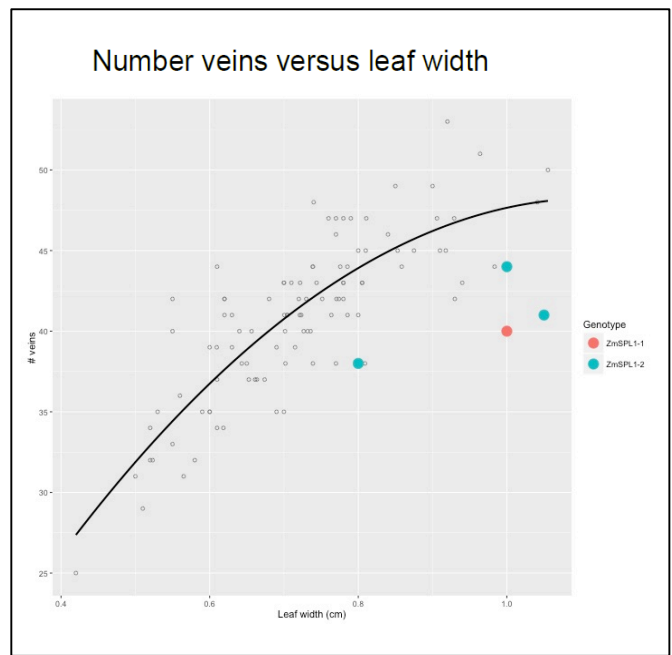

Representative leaf cross sections:

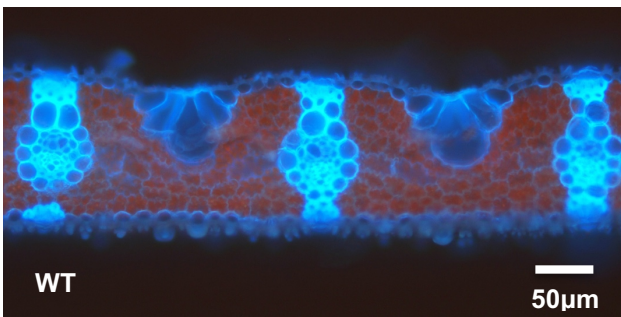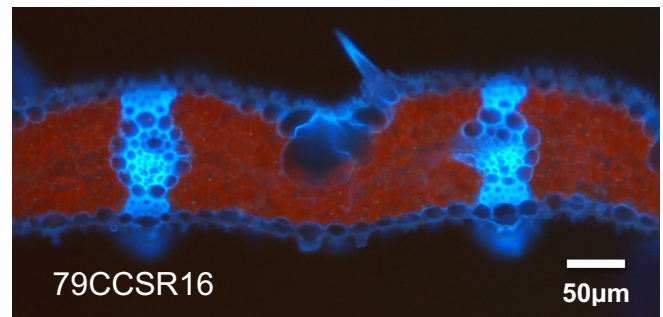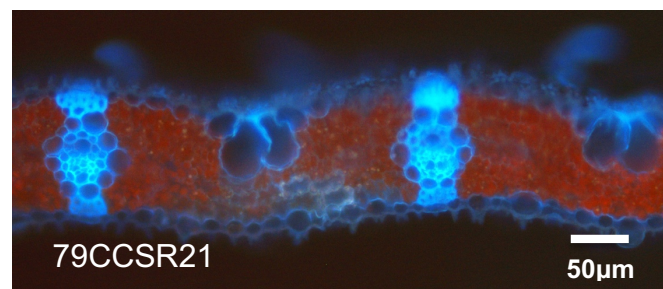

GRMZM2G131516

GRAS (ZmSCR1)

Gene ID: JL8

Foliar expression

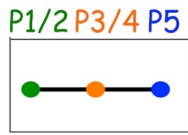

Husk expression

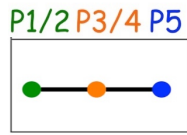

Construct: ZmUBI<sub>pro</sub>:cDNA  
(rice codon optimised) (ID# MS154)

Three independent T1 lines:  
ZmSCR1-1 (1B – 3 individuals)  
ZmSCR1-2 (5A – 3 individuals)  
ZmSCR1-3 (7C – 3 individuals)

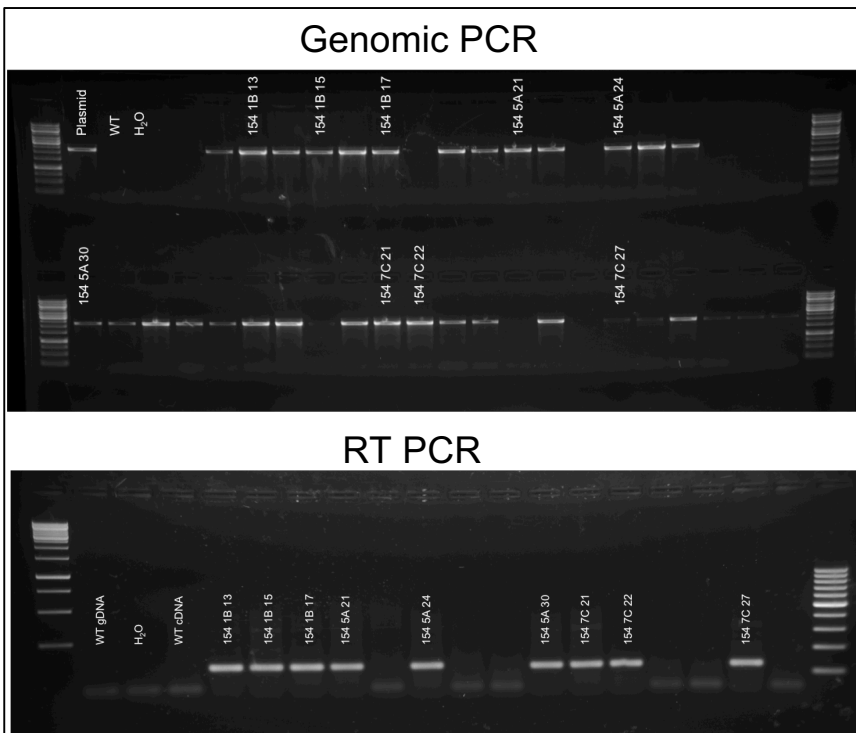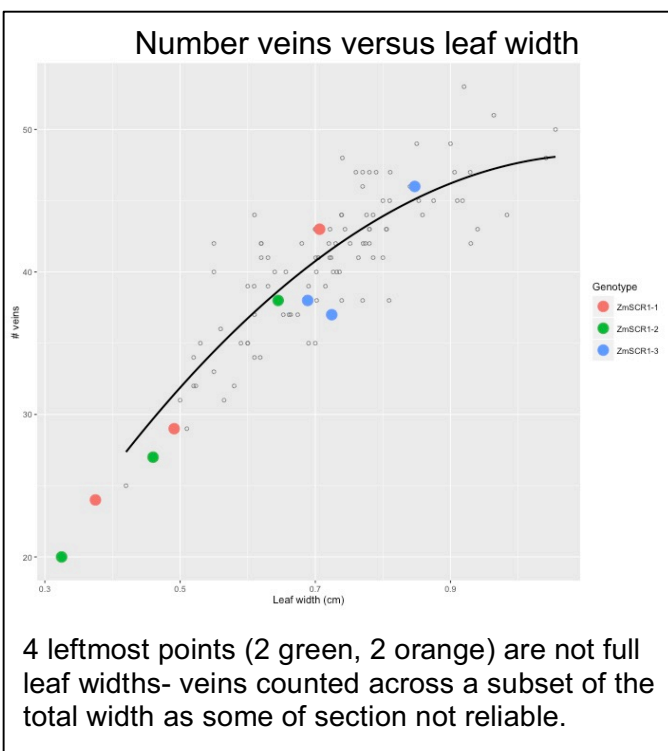

Representative leaf cross sections:

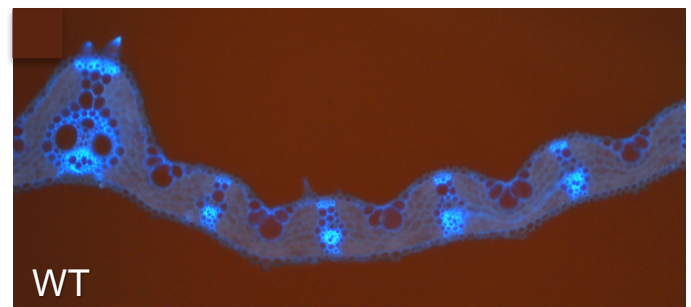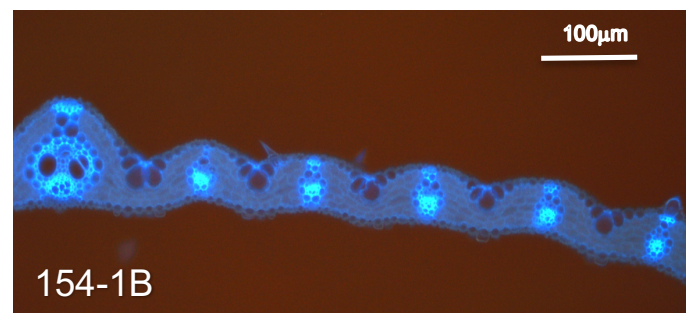

AC215201.3\_FG008

bHLH

Gene ID: JL13

Foliar expression

Husk expression

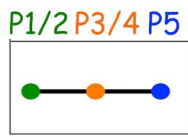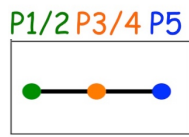

Construct: ZmUBI<sub>pro</sub>:cDNA (ID# R1B6)

Two independent T1 lines:

13-1 (R1B618.1 – 10 individuals)

13-2 (R1B623.1 – 10 individuals)

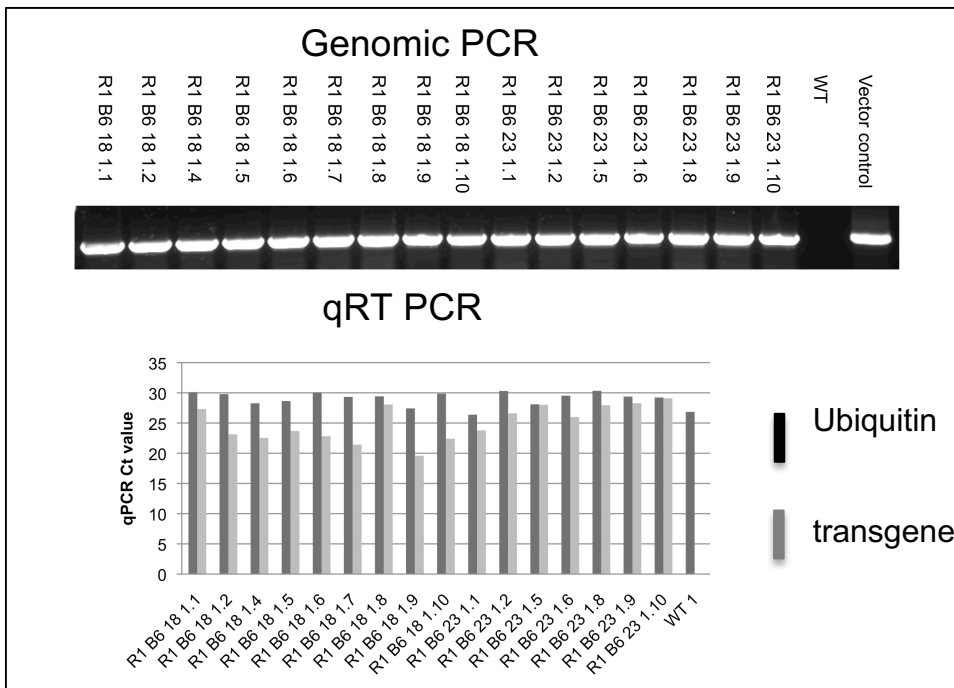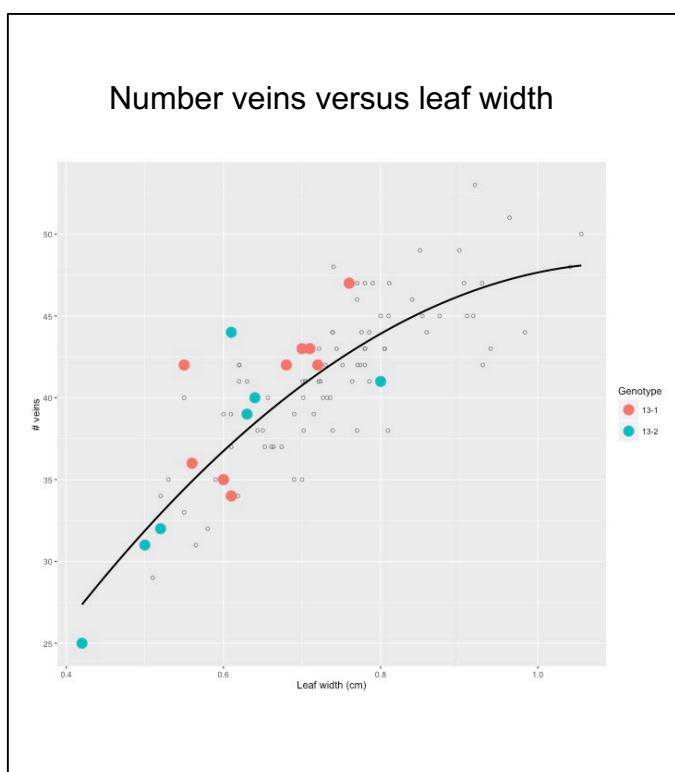

Representative leaf cross sections:

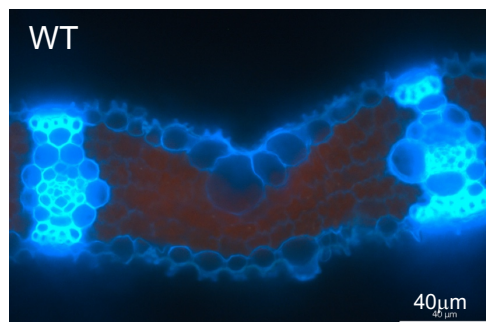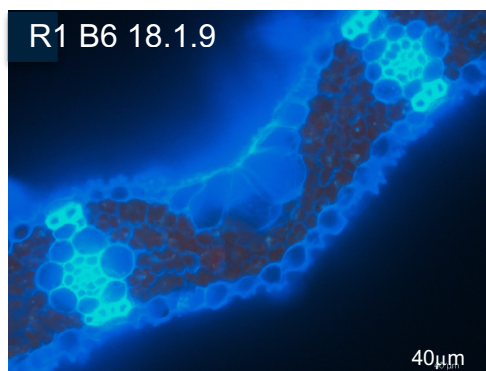



GRMZM2G016477

LRR kinase

Gene ID: JL15

Foliar expression

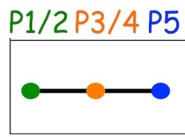

Husk expression

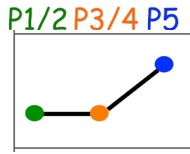

Construct: ZmUBI<sub>pro</sub>:cDNA (ID# MS80)

Three independent T2 lines:

15-1 (MS80-10 – 1 individual)

15-2 (MS80-12 – 2 individuals)

15-3 (MS80-13 – 2 individuals)

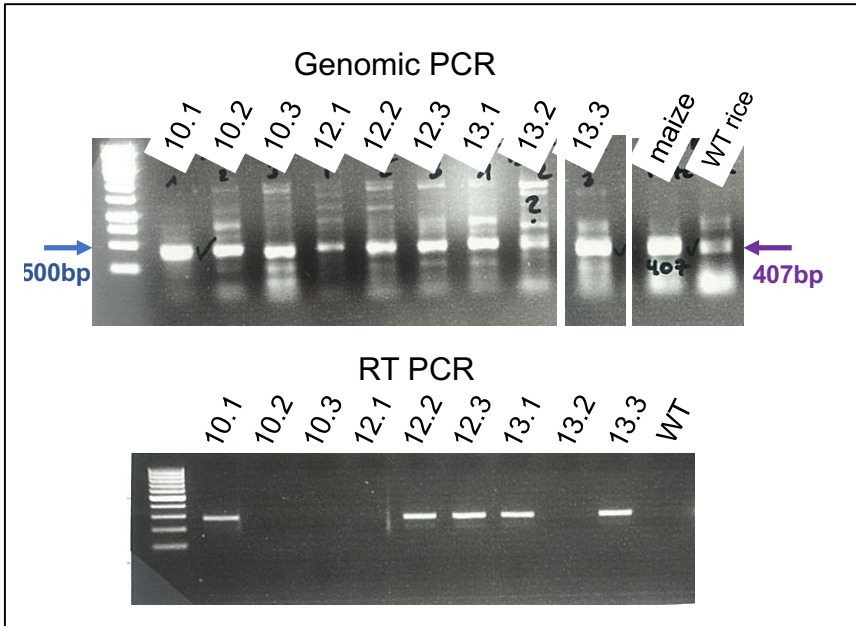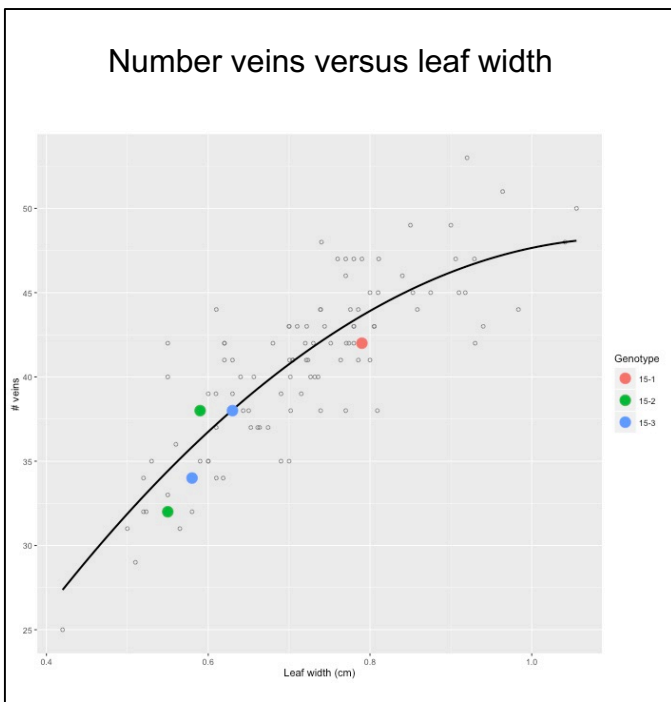

Representative leaf cross sections:

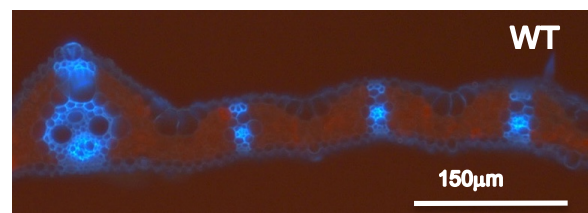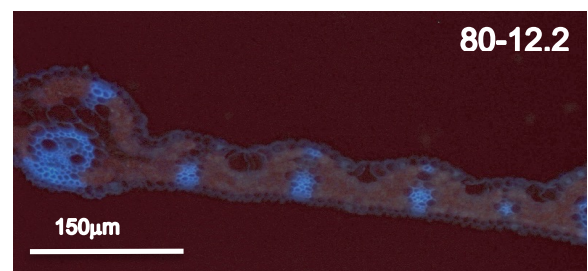

GRMZM2G119359

Growth Regulating Factor

Gene ID: JL26

Foliar expression

P1/2 P3/4 P5

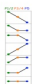

Husk expression

P1/2 P3/4 P5

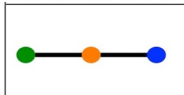

Construct: ZmUBI<sub>pro</sub>:cDNA (ID# 70CC)

Two independent T2 lines:

26-1 (70CCS3 – 5 individuals)

26-2 (70CCS101 – 7 individuals)

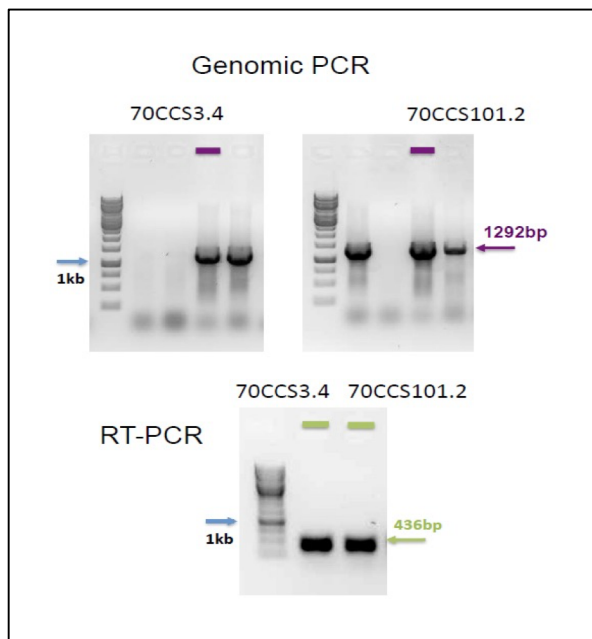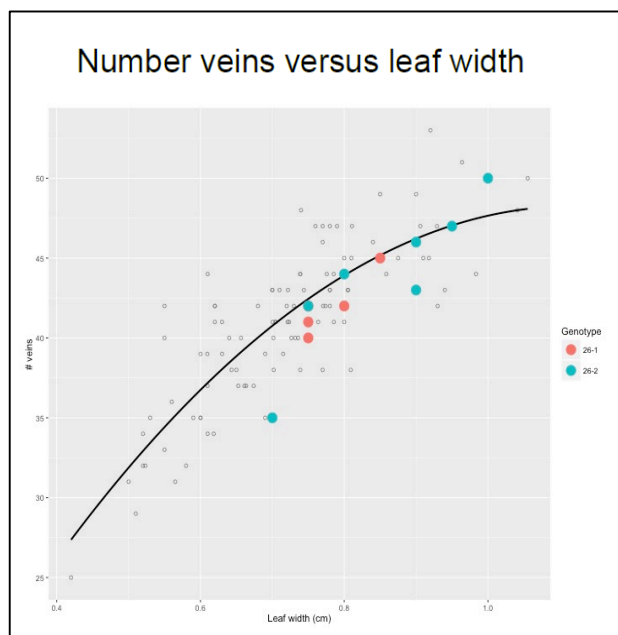

Representative leaf cross sections:

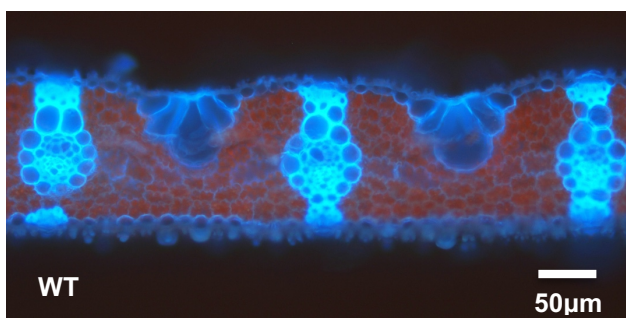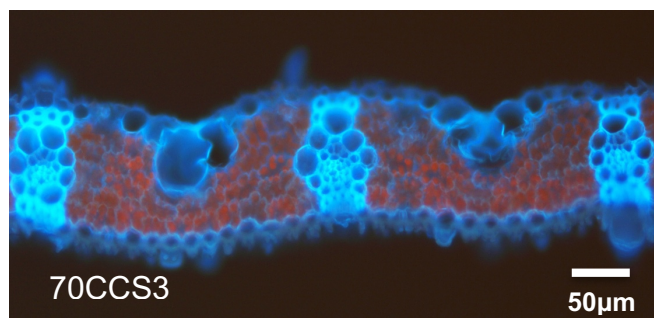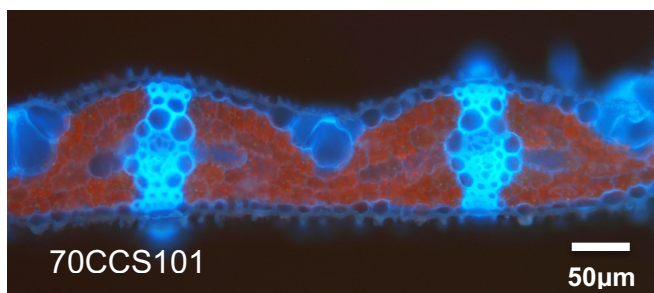

GRMZM5G893117

Growth Regulating Factor

Gene ID: JL27

Foliar expression

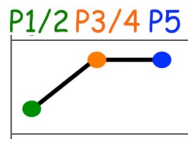

Husk expression

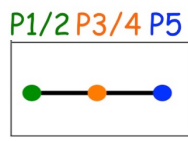

Construct: ZmUBI<sub>pro</sub>:cDNA (ID# 71CC)  
ZmUBI<sub>pro</sub>:gDNA (ID# 71GC)

Four independent T1 lines:

27-1 (71CCS11 – 1 individual)

27-2 (71CCS16 – 1 individual)

27-3 (71GCS1 – 3 individuals)

27-4 (71GCS3 – 7 individuals)

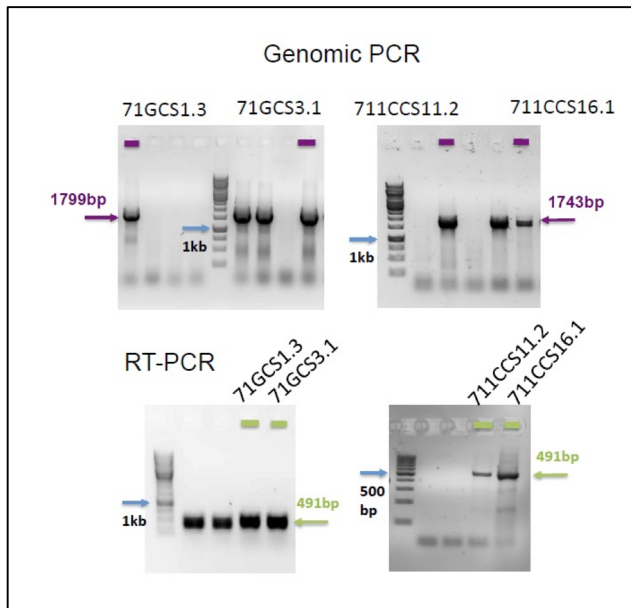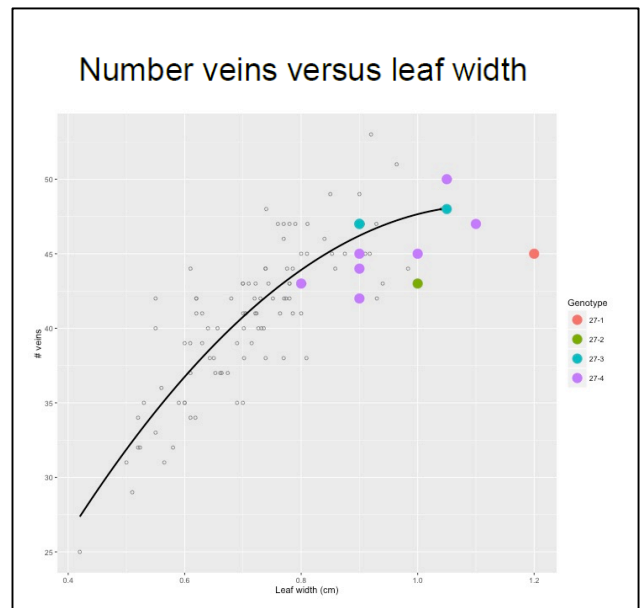

Representative leaf cross sections:

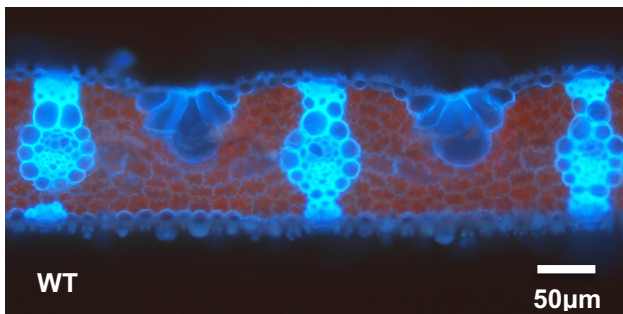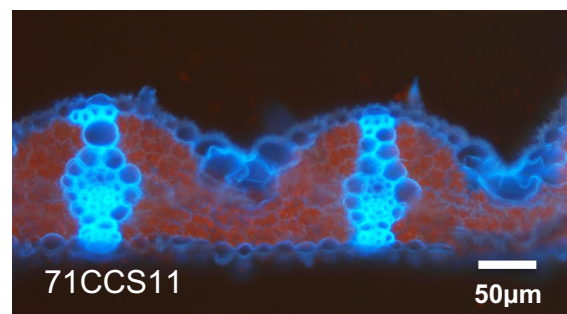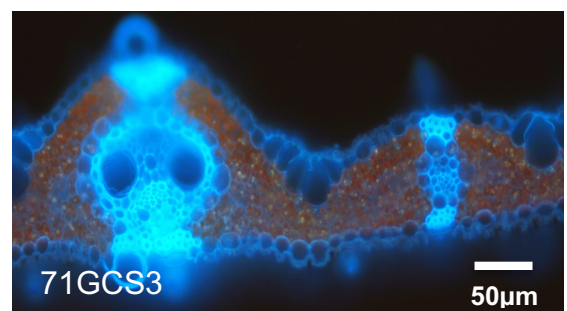

GRMZM2G178182

bHLH

Gene ID: JL29

Foliar expression

P1/2 P3/4 P5

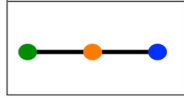

Husk expression

P1/2 P3/4 P5

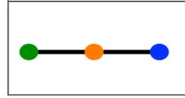

Construct: ZmUBI<sub>pro</sub>:cDNA (ID# 73CC)

Two independent T1 lines:

29-1 (73CCS1 – 6 individuals)

29-2 (73CCSR19 – 3 individuals)

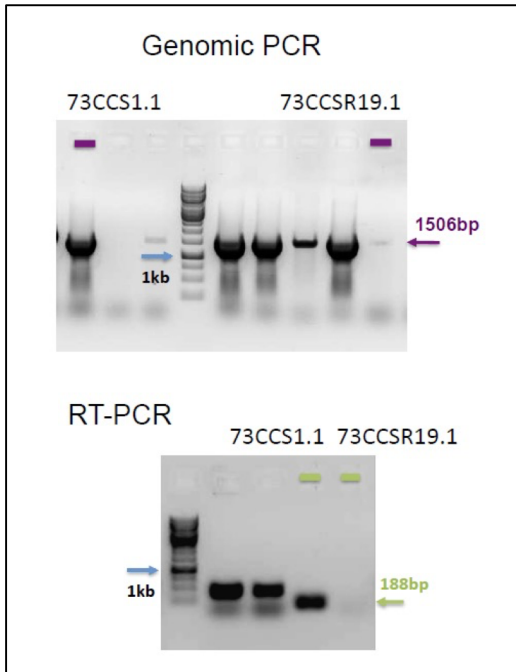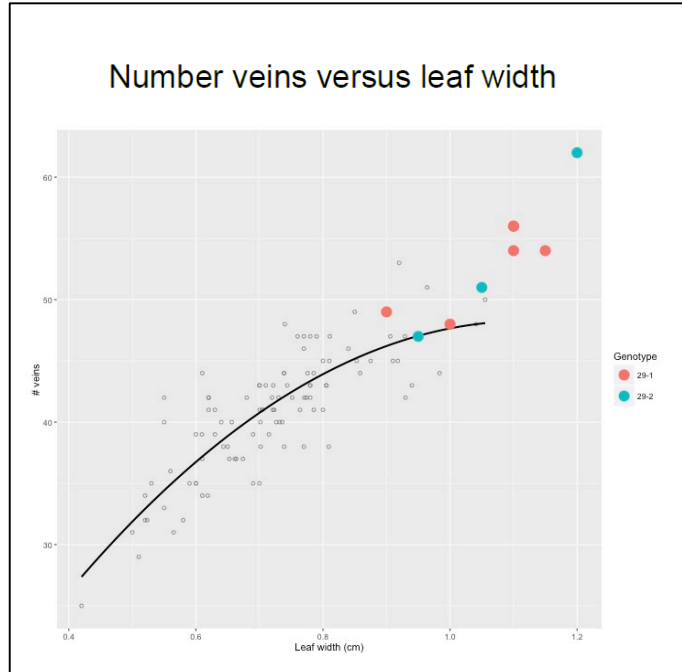

Representative leaf cross sections:

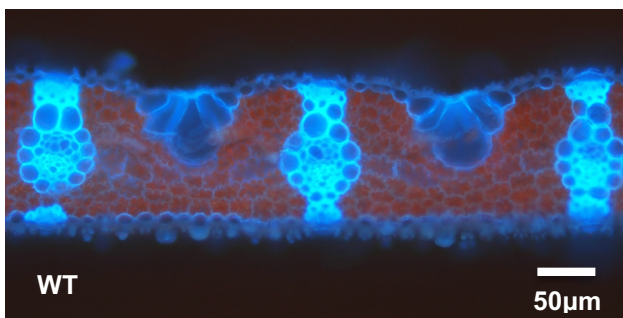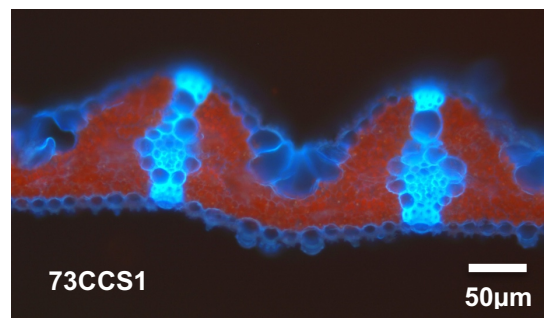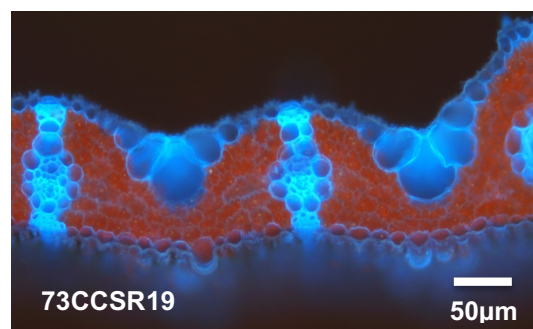

GRMZM2G140669

GATA ZnF

Gene ID: JL30

Foliar expression

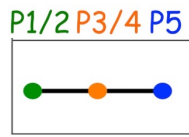

Husk expression

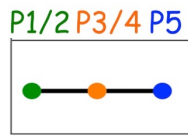

Construct: ZmUBI<sub>pro</sub>:cDNA (ID# 74CC)

Two independent T1 lines:

30-1 (74CCS1 – 1 individual)

30-2 (74CCS10 – 1 individual)

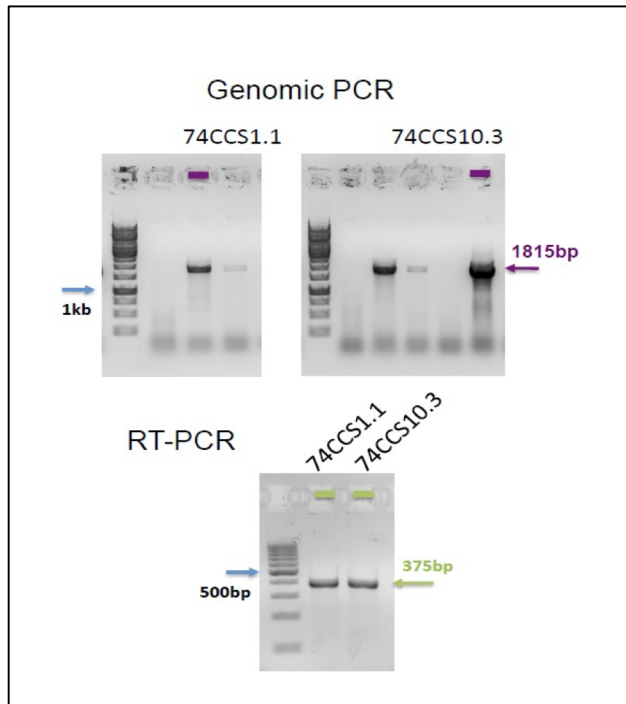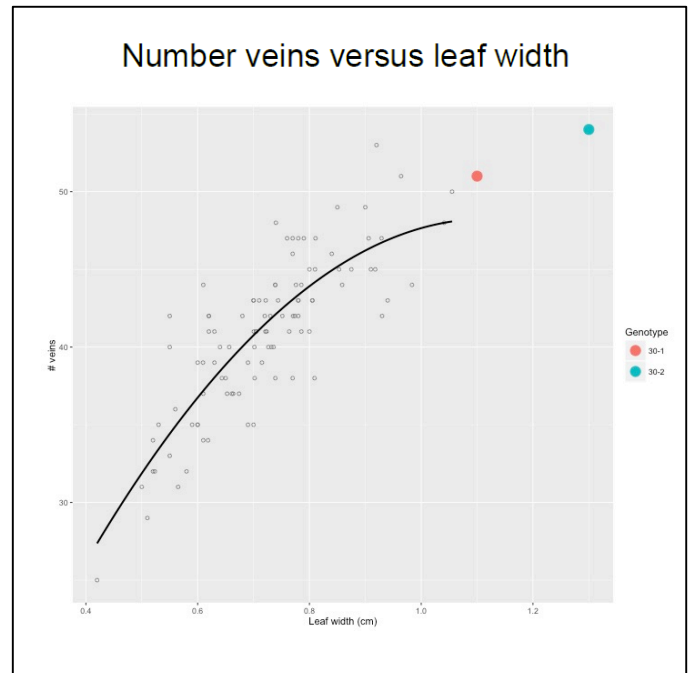

Representative leaf cross sections:

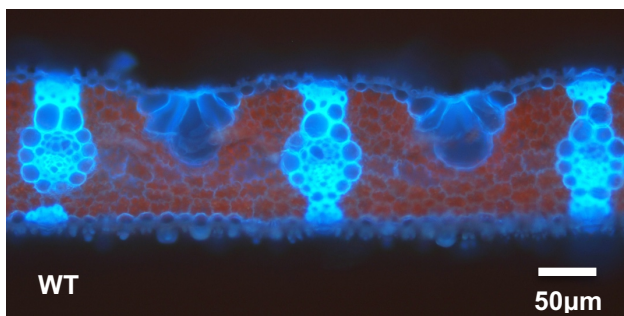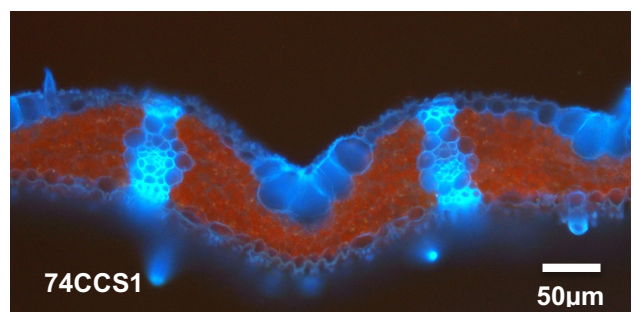

GRMZM2G472945

TUBBY-like

Gene ID: JL31

Foliar expression

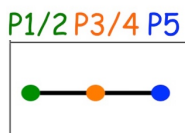

Husk expression

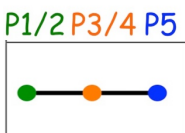

Construct: ZmUBI<sub>pro</sub>:cDNA (ID# 75CC)

Two independent T1 lines:

31-1 (75CCS6 – 3 individuals)

31-1 (75CCSR15 – 11 individuals)

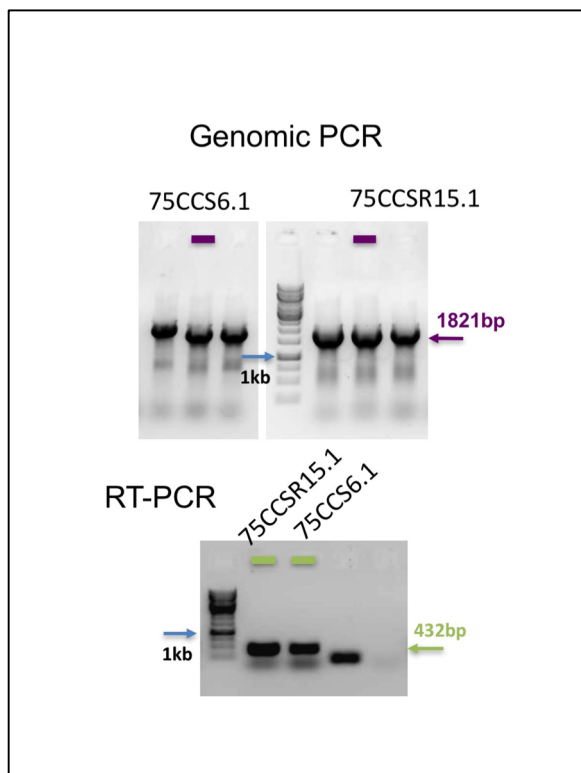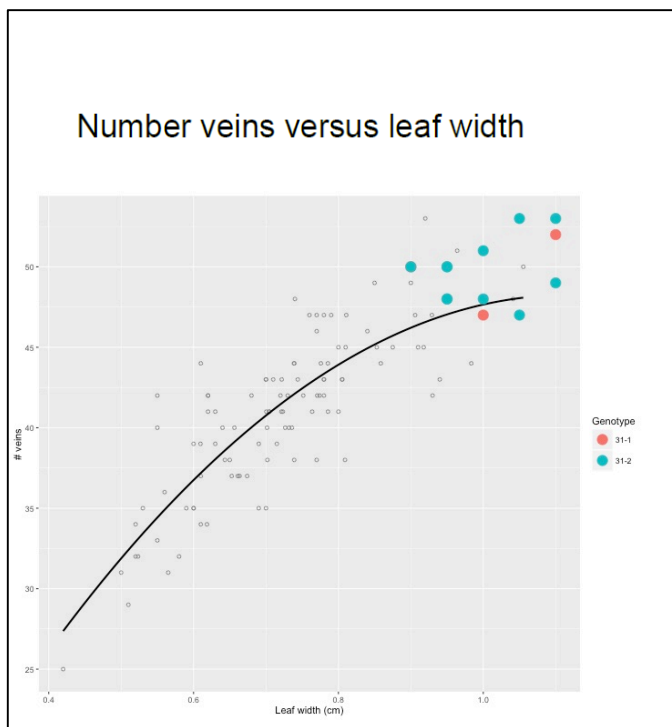

Representative leaf cross sections:

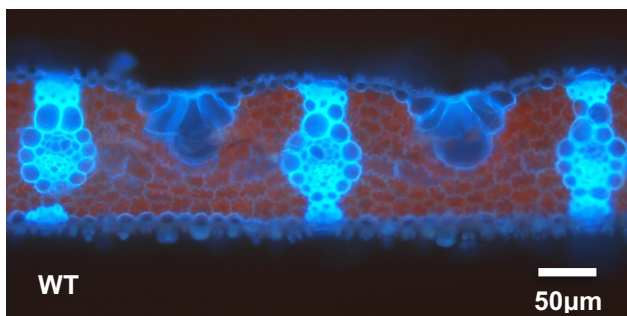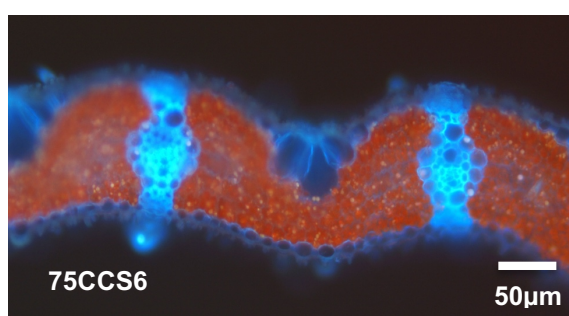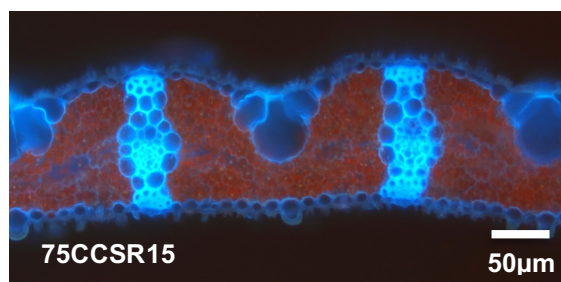

GRMZM2G146688

AP2

Gene ID: JL32

Foliar expression

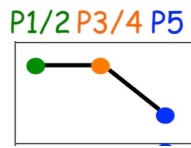

Husk expression

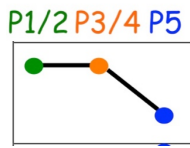

Construct: ZmUBI<sub>pro</sub>:cDNA (ID# 77CC)  
ZmUBI<sub>pro</sub>:gDNA (ID# 77GC)

Four independent T1 lines: This gene has been transformed with both CDS (77CC) and genomic sequence (77GC), but no gene expression was detected in either attempt.

32-1 (77CCSR10 – 5 individuals)

32-2 (77CCSR8 – 6 individuals)

32-3 (77GCS1 – 1 individual)

32-4 (77GCS18 – 1 individual)

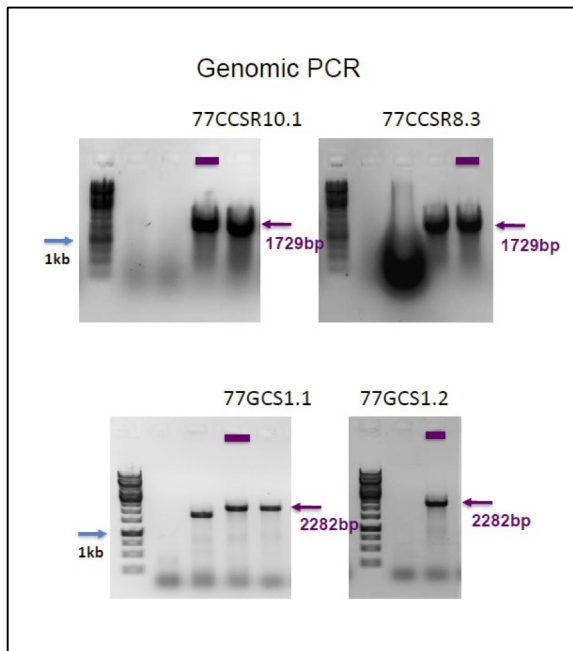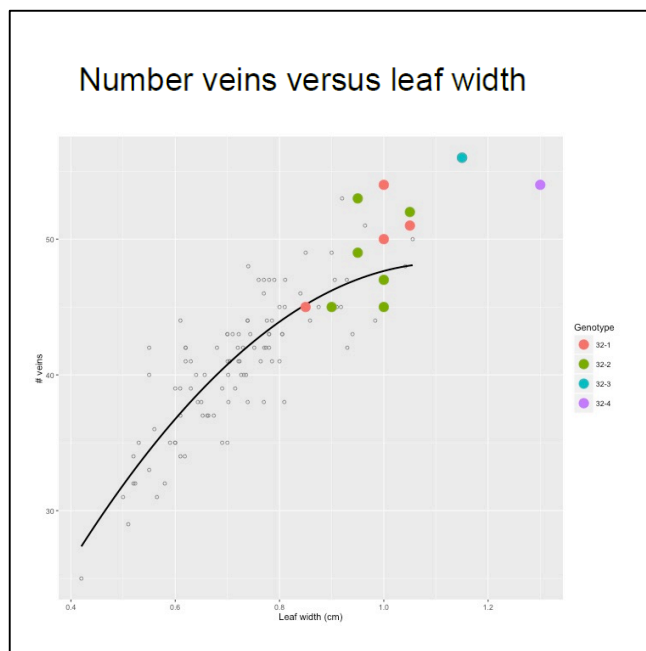

Representative leaf cross sections:

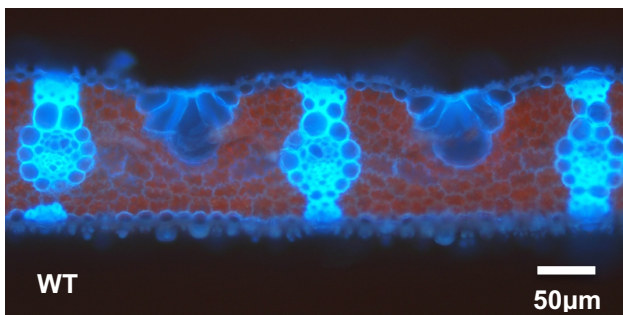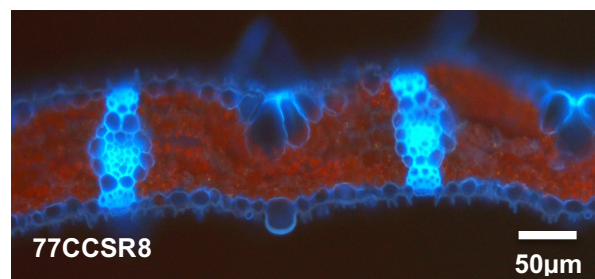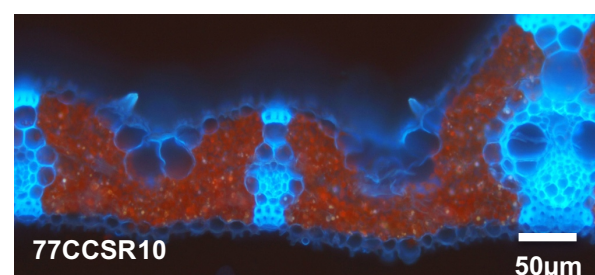

GRMZM2G023051

Unknown

Gene ID: JL35

Foliar expression

Husk expression

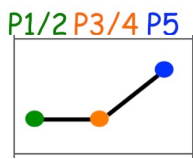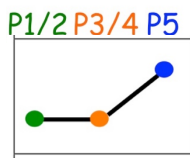

Construct: ZmUBI<sub>pro</sub>:cDNA (ID# 81CC)

Two independent T1 lines:

35-1 (81CCS7 – 8 individuals)

35-2 (81CCS2 – 9 individuals)

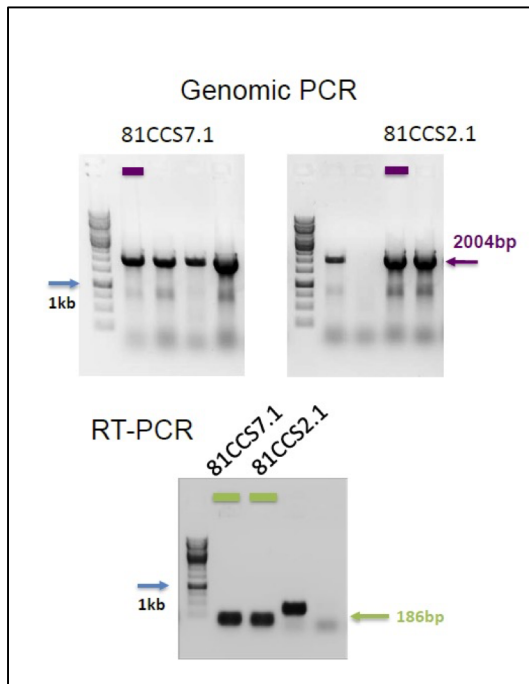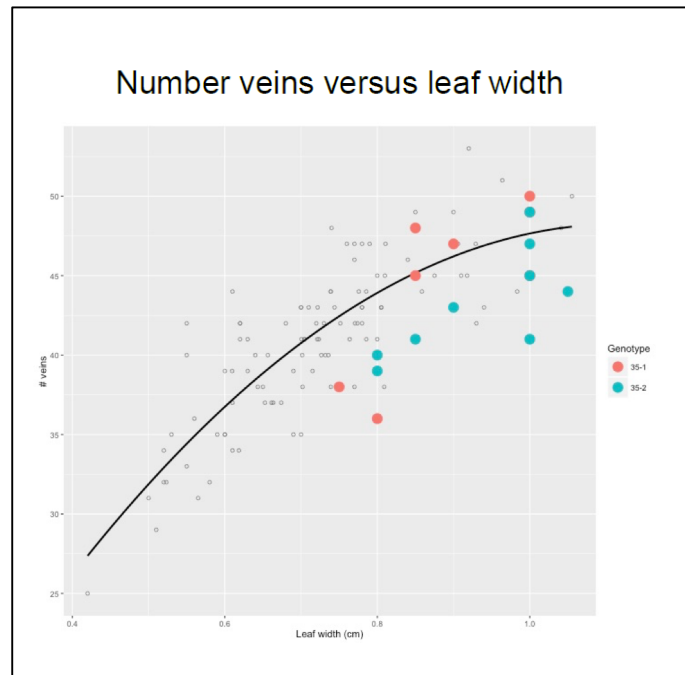

Representative leaf cross sections:

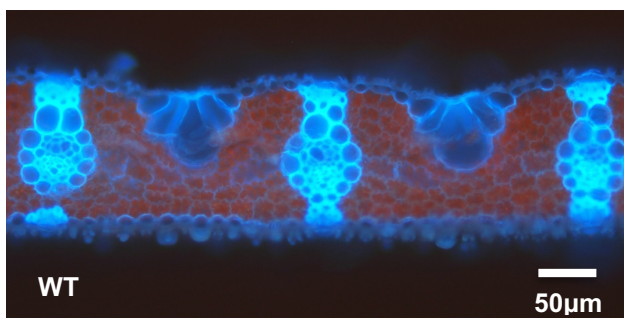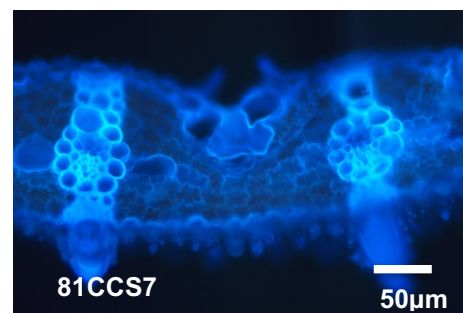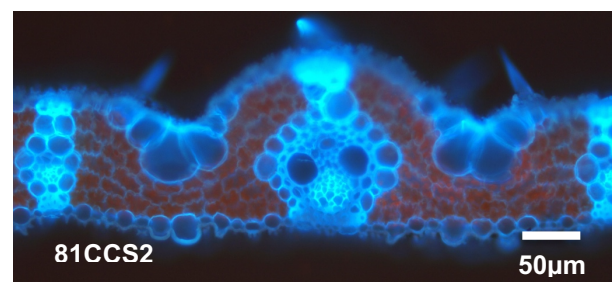



GRMZM2G109480

Unknown

Gene ID: JL36

Foliar expression

P1/2 P3/4 P5



Husk expression

P1/2 P3/4 P5

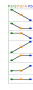

Construct: ZmUBI<sub>pro</sub>:cDNA (ID# 82CC)

Two independent T1 lines:

36-1 (82CCS1 – 3 individuals)

36-2 (82CCS2 – 4 individuals)

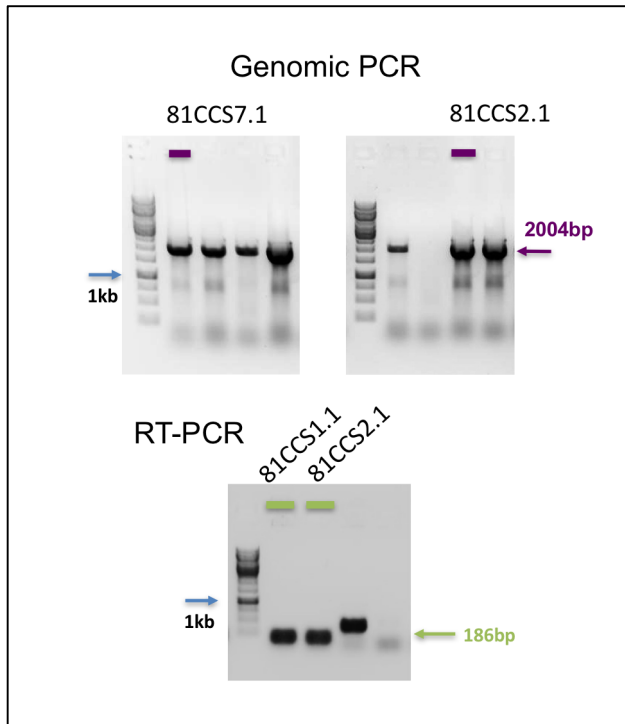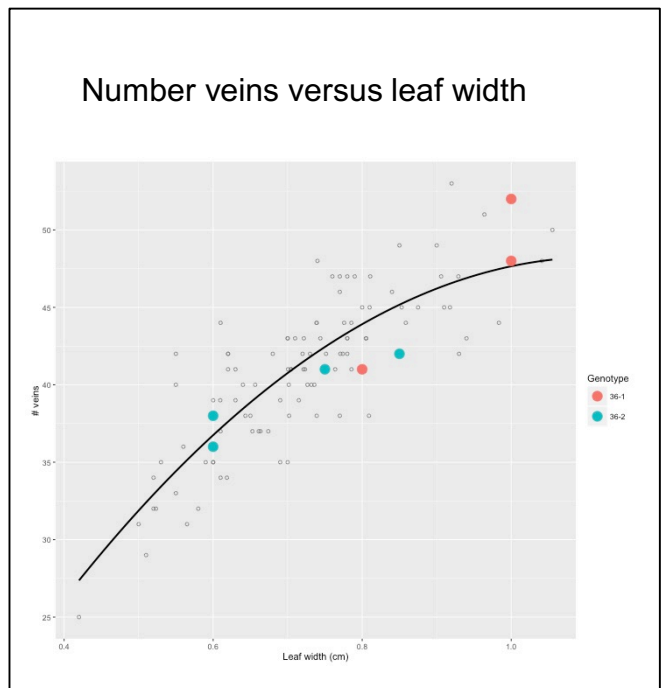

Representative leaf cross sections:

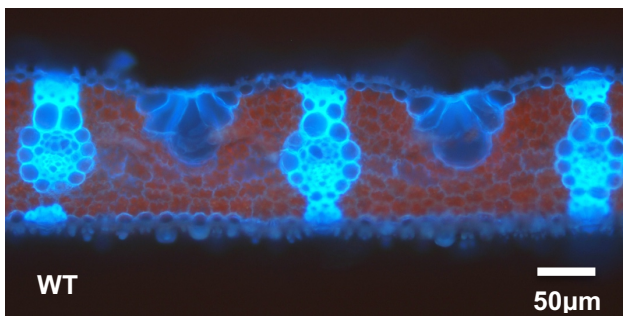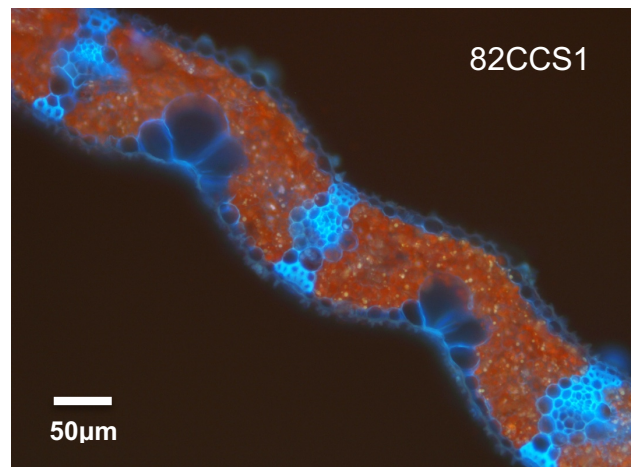

GRMZM2G097275

SBP

Gene ID: JL47

Foliar expression

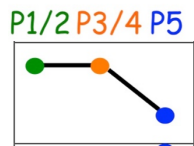

Husk expression

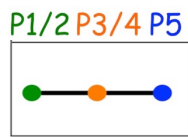

Construct: ZmUBI<sub>pro</sub>:cDNA (ID# 89CC)

Two independent T1 lines:

47-1 (89CCS105 – 4 individuals)

47-2 (89CCS107 – 2 individuals)

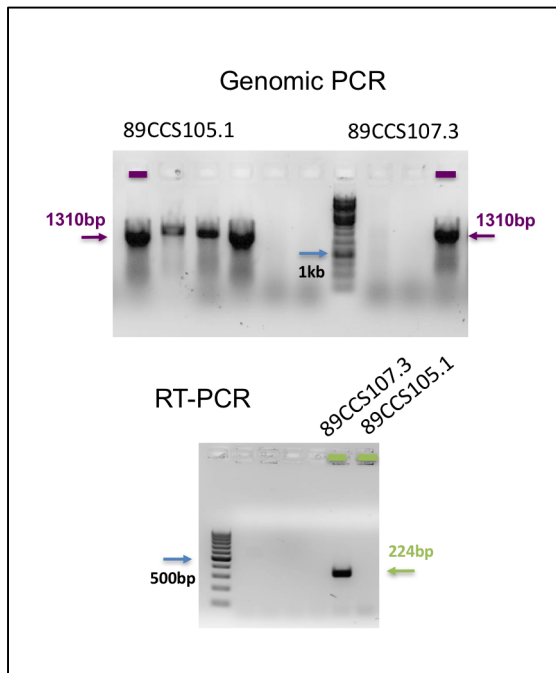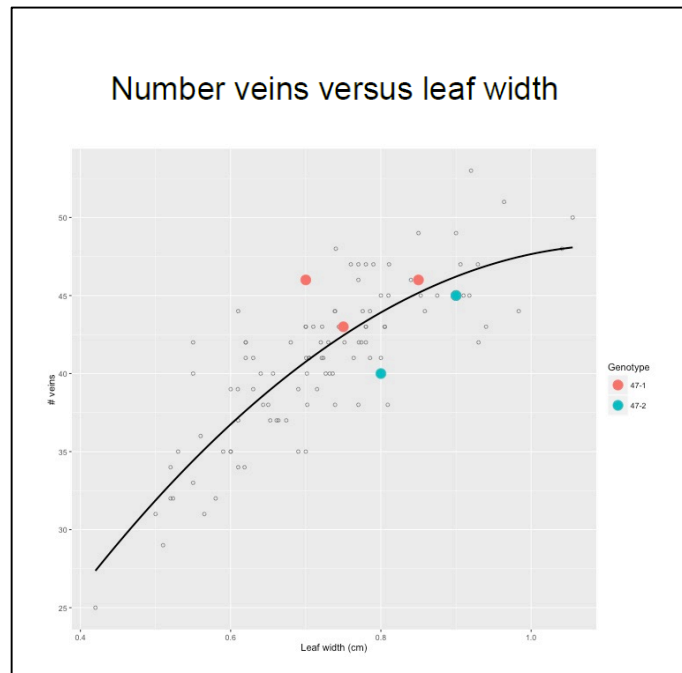

Representative leaf cross sections:

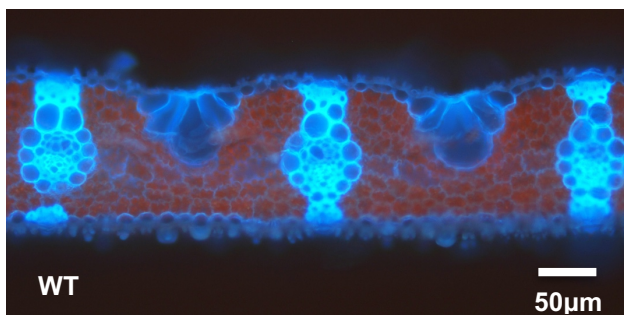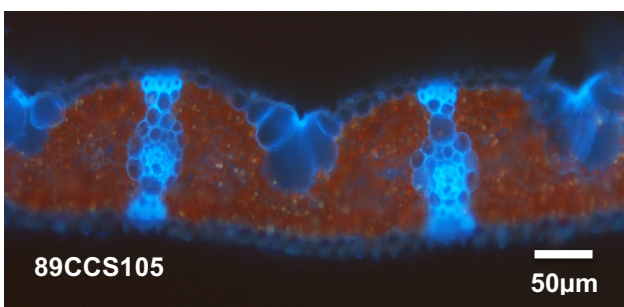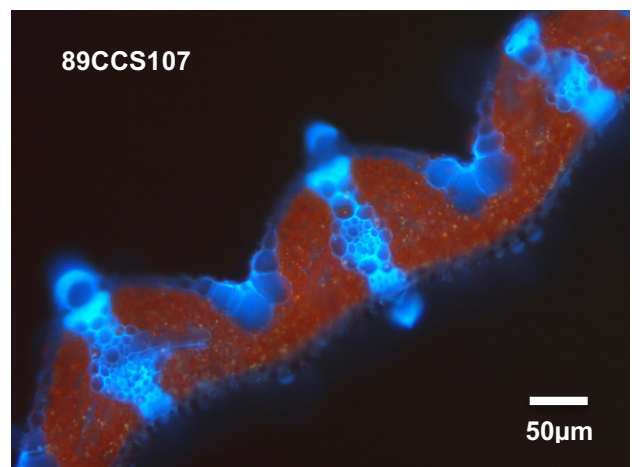

GRMZM2G148467

SBP

Gene ID: JL48

Foliar expression

Husk expression

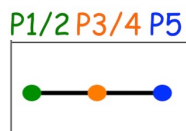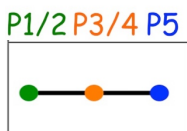

Construct: ZmUBI<sub>pro</sub>:cDNA (ID# 88CC)

Two independent T1 lines:

48-1 (88CCS1 – 2 individuals)

48-2 (82CCS3 – 7 individuals)

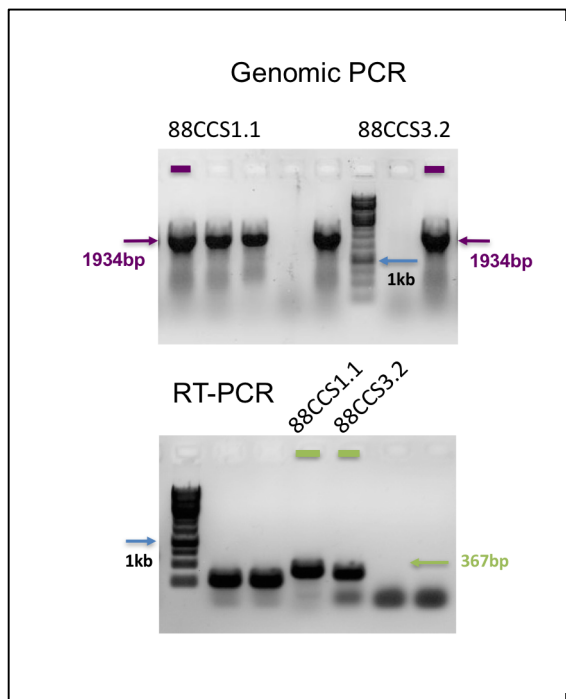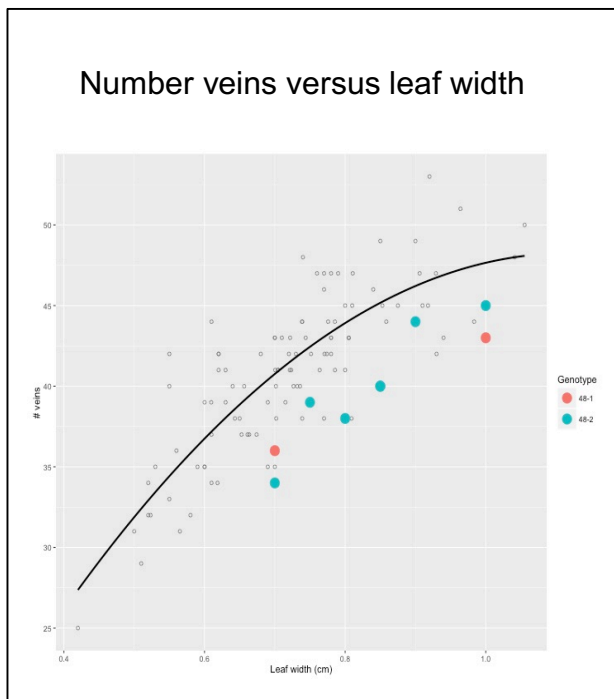

Representative leaf cross sections:

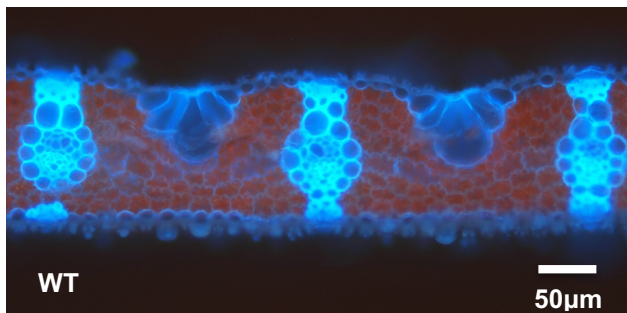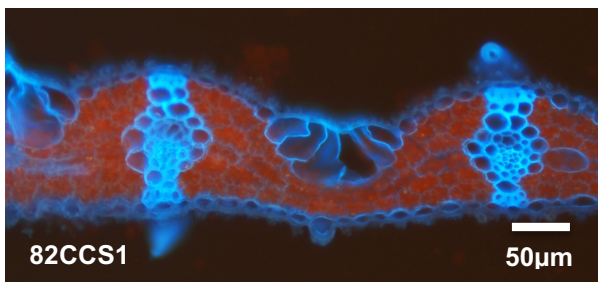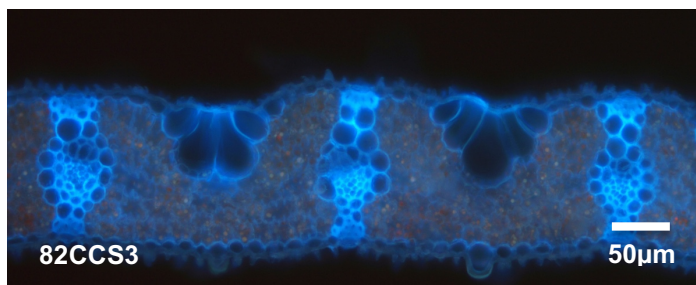

GRMZM2G028643

LRR kinase

Gene ID: JL49

Foliar expression

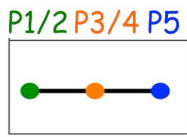

Husk expression



Construct: ZmUBI<sub>pro</sub>:cDNA (ID# 86CC)

Two independent T1 lines:

49-1 (86CCS1 – 6 individuals)

49-2 (86CCSR3 – 5 individuals)

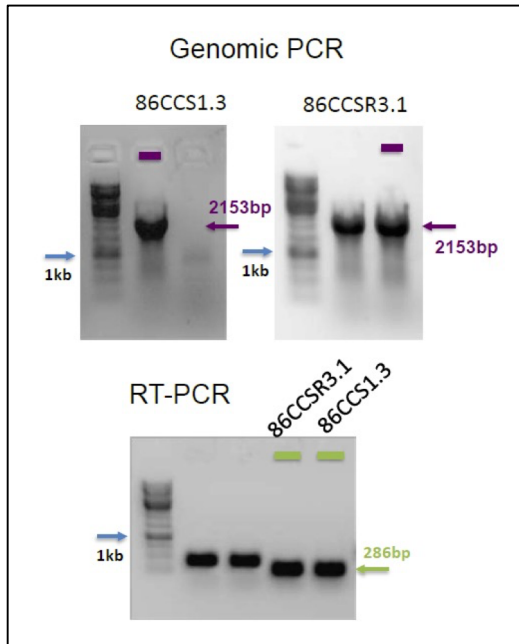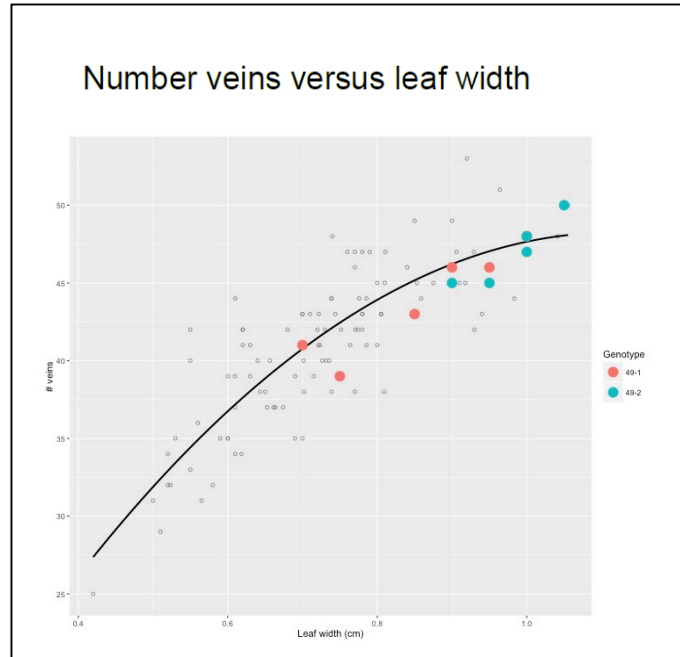

Representative leaf cross sections:

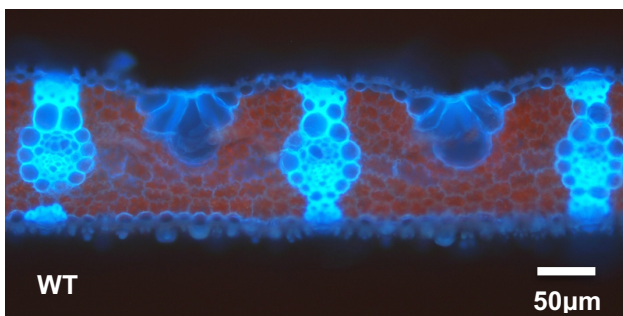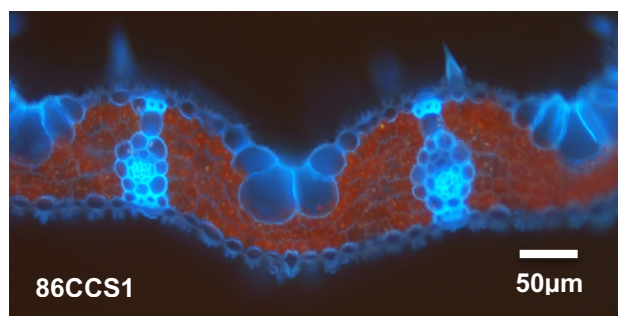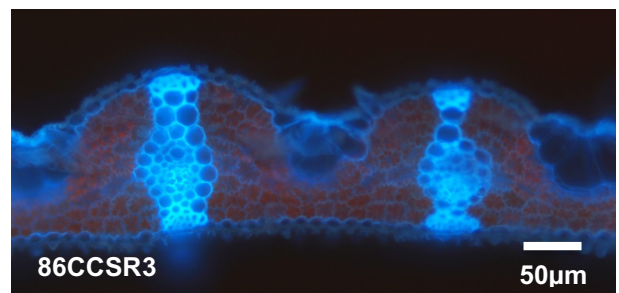

GRMZM2G178102

Class III-HD ZIP

Gene ID: JL51

Foliar expression

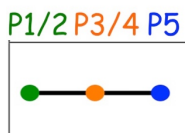

Husk expression

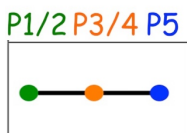

Construct: ZmUBI<sub>pro</sub>:cDNA (ID# 87CC)

Two independent T1 lines:

51-1 (87CCS1 – 3 individuals)

51-2 (87CCS2 – 2 individuals)

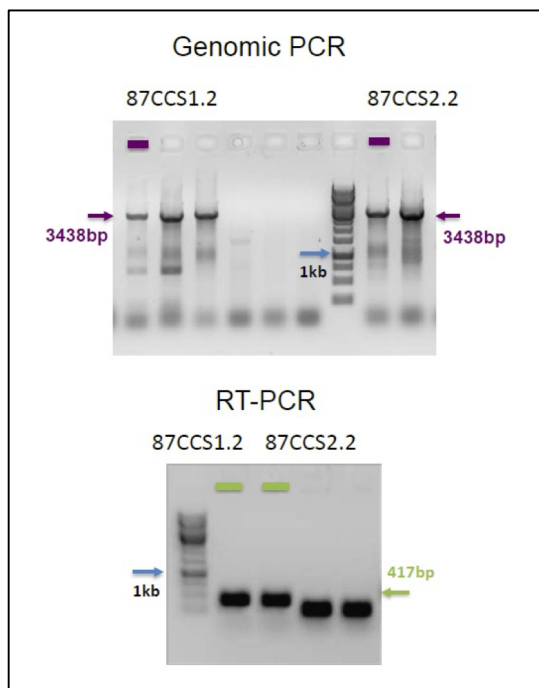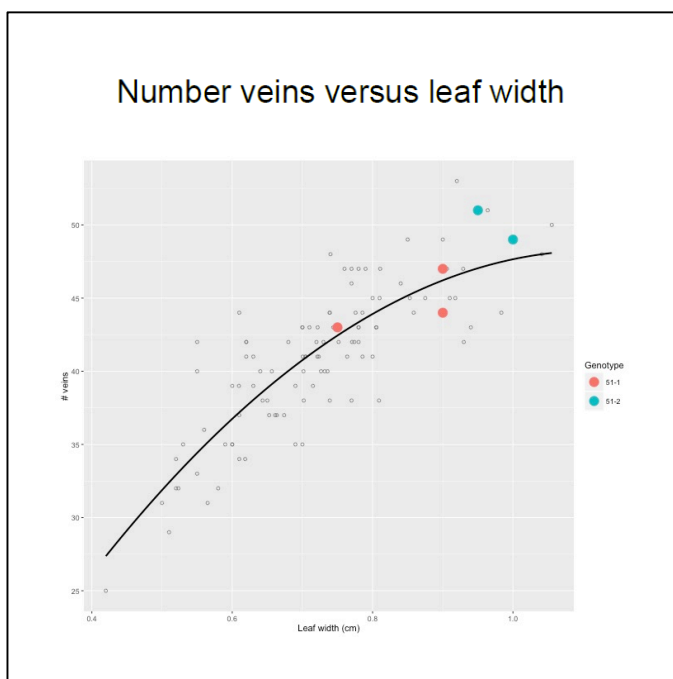

Representative leaf cross sections:

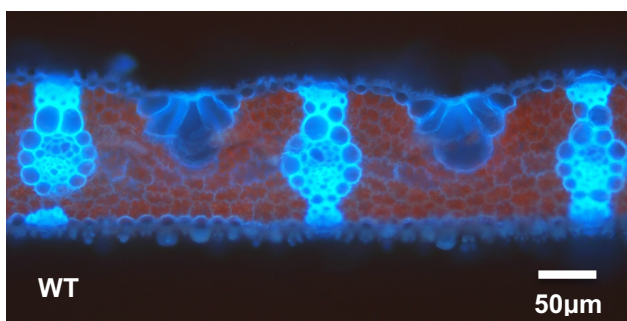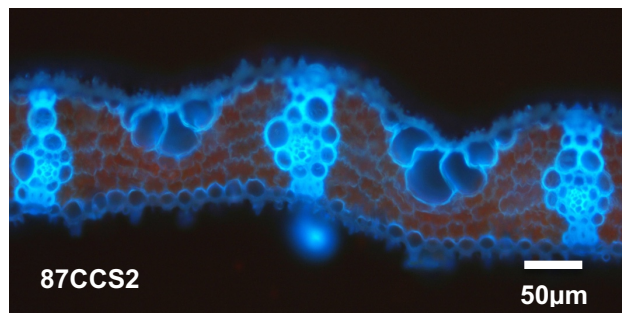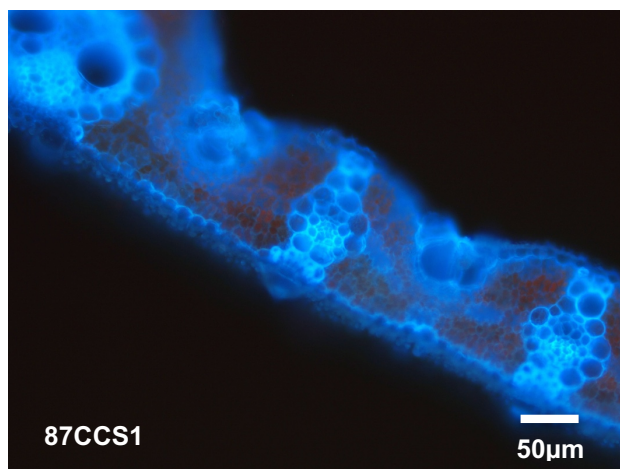

GRMZM2G061314

LRR binding protein

Gene ID: JL60

Foliar expression

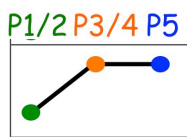

Husk expression

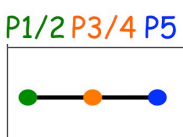

Construct: ZmUBI<sub>pro</sub>:cDNA (ID# 945)

Three independent T1 lines:  
60-1 (IRS945-19 – 1 individual)  
60-2 (IRS945-20 – 1 individual)  
60-3 (IRS945-11 – 1 individual)

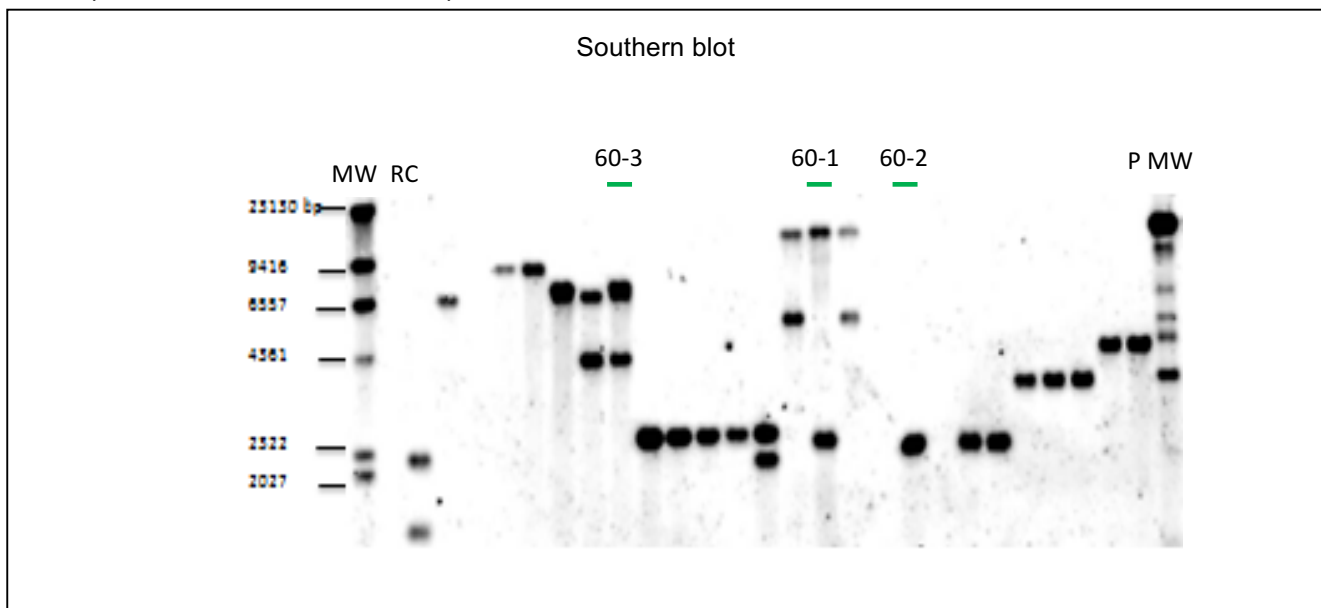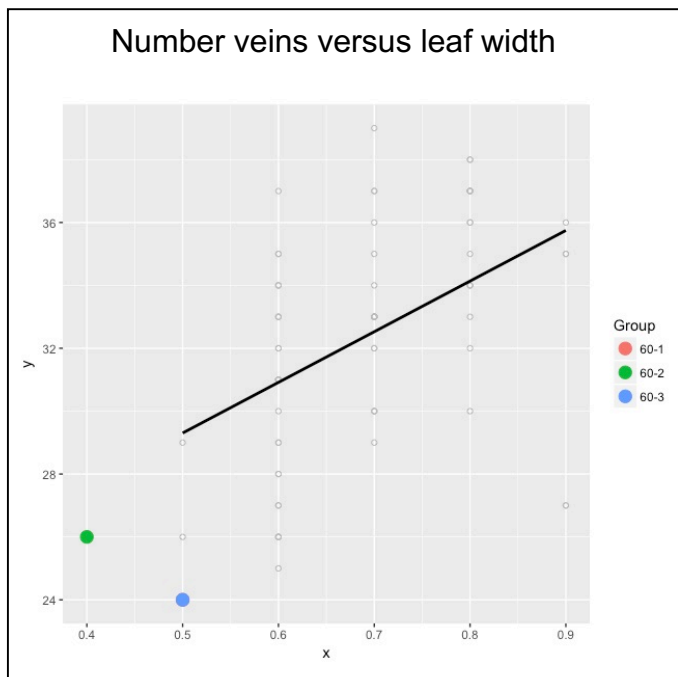

Representative cross section of segregating WT leaf

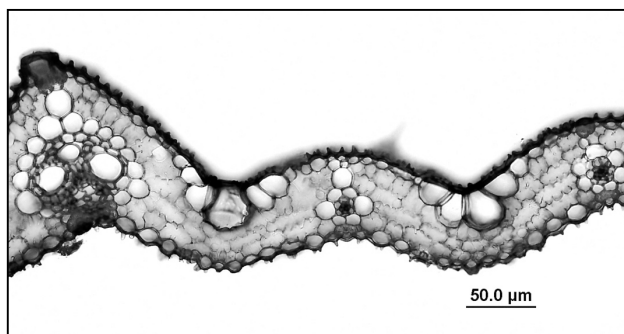

Representative cross section of line 60-3 leaf

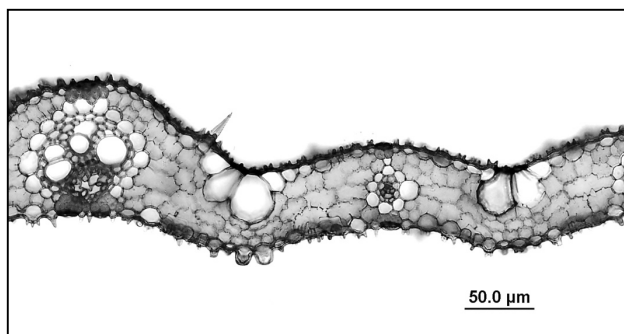

GRMZM2G089819

Brassinosteroid LRR RLK

Gene ID: JL68

Foliar expression

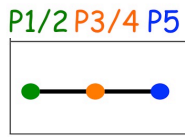

Husk expression

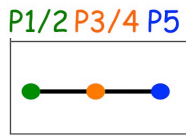

Construct: ZmUBI<sub>pro</sub>:cDNA (ID# 953)

Six independent T1 lines:

- |                                 |                                 |
|---------------------------------|---------------------------------|
| 68-1 (IRS953-1 – 1 individual)  | 68-4 (IRS953-6 – 2 individuals) |
| 68-2 (IRS953-2 – 1 individual)  | 68-5 (IRS953-7 – 1 individual)  |
| 68-3 (IRS953-3 – 3 individuals) | 68-6 (IRS953-10 – 1 individual) |

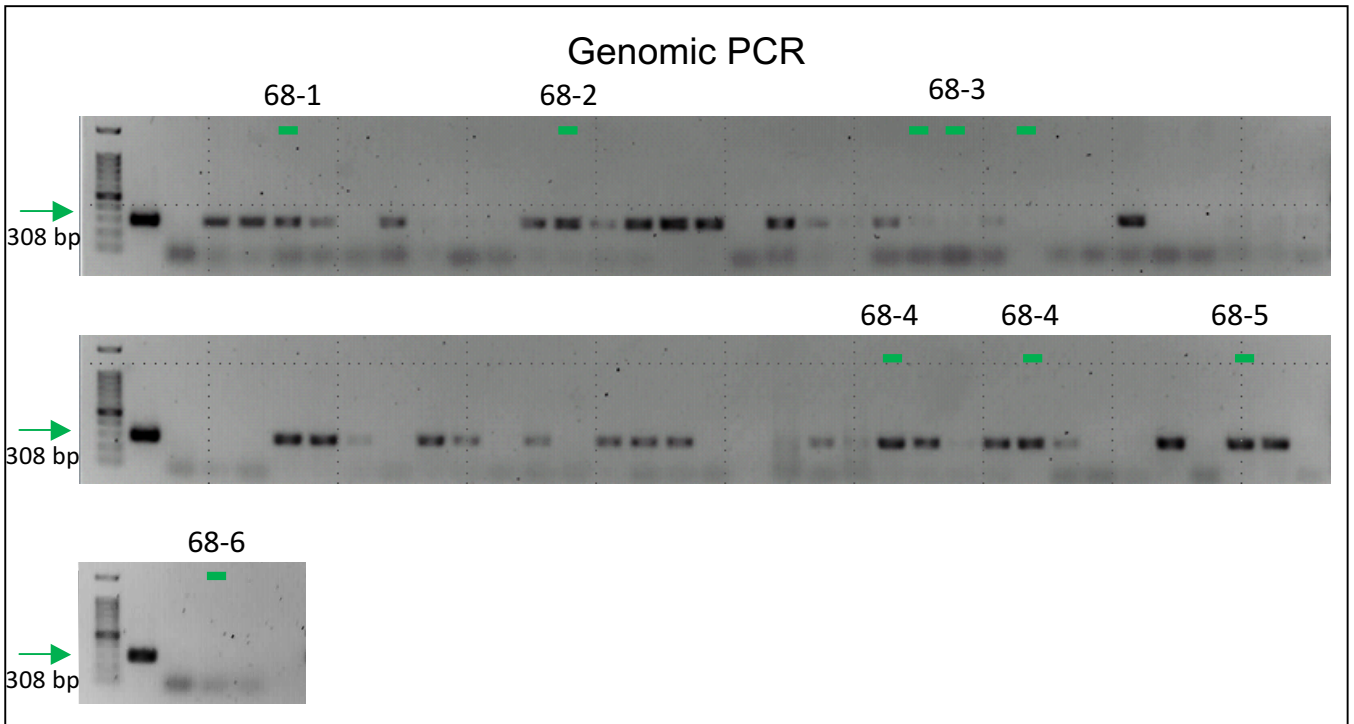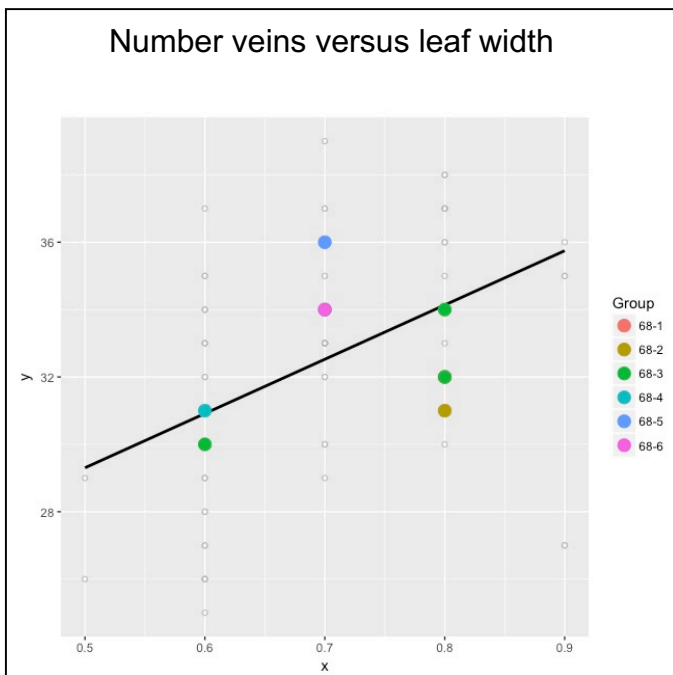

Representative cross section of segregating WT leaf

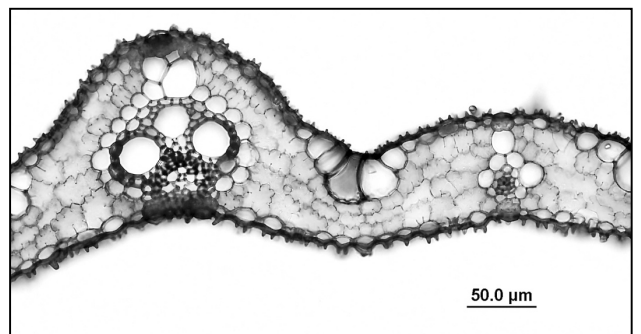

Representative cross section of line 68-6 leaf

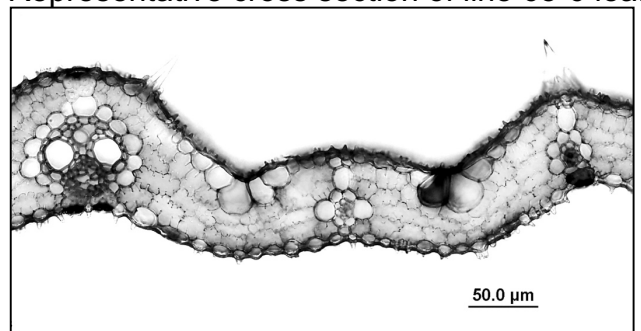

GRMZM5G850129

Growth Regulatory Factor

Gene ID: JL75

Foliar expression

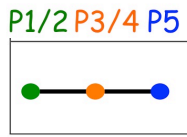

Husk expression

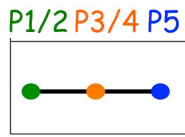

Construct: ZmUBI<sub>pro</sub>:cDNA (ID# 948)

Two independent T1 lines:

75-1 (IRS948-19 – 6 individuals)

75-2 (IRS948-23 – 2 individuals)

### Genomic PCR

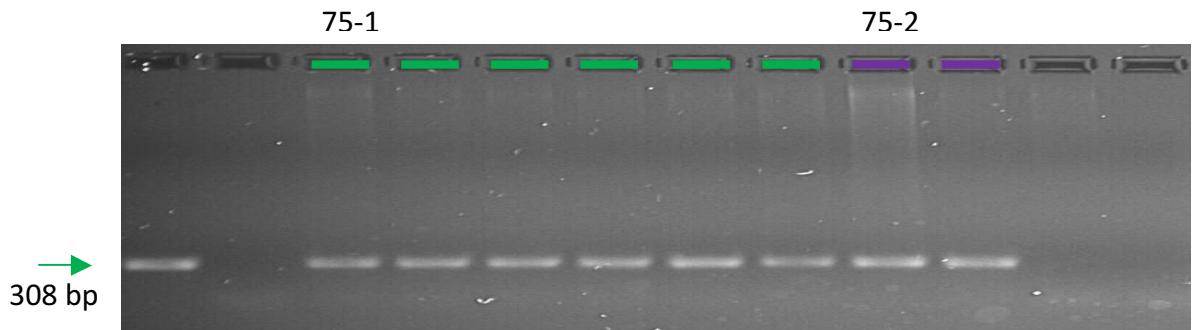

### Number veins versus leaf width

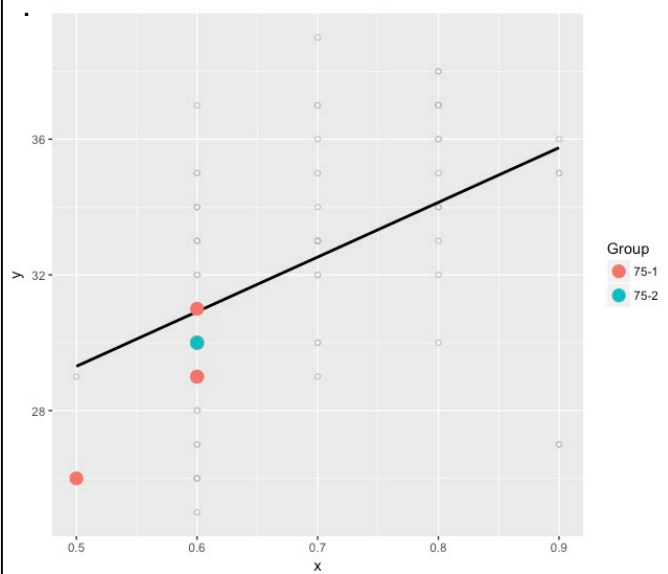

Representative cross section of segregating WT leaf

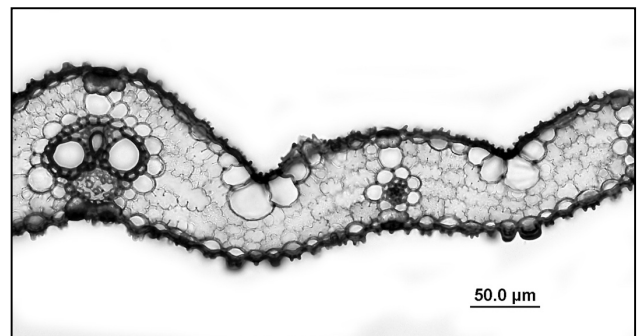

Representative cross section of line 75-2 leaf

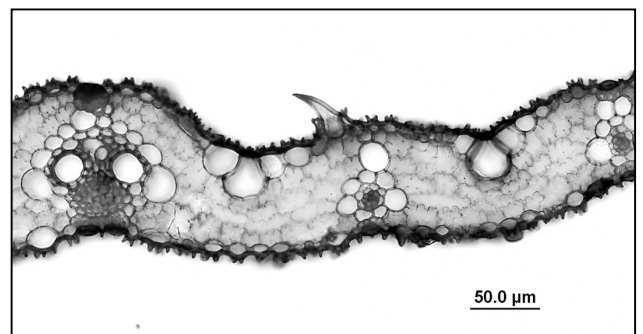



GRMZM2G061734

SBP domain

Gene ID: JL76

Foliar expression

P1/2 P3/4 P5

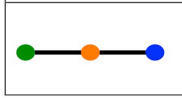

Husk expression

P1/2 P3/4 P5



Construct: ZmUBI<sub>pro</sub>:cDNA (ID# 960)

Two independent T1 lines:

76-1 (IRS960-20 – 2 individuals)

76-2 (IRS960-22 – 2 individuals)

### Genomic PCR

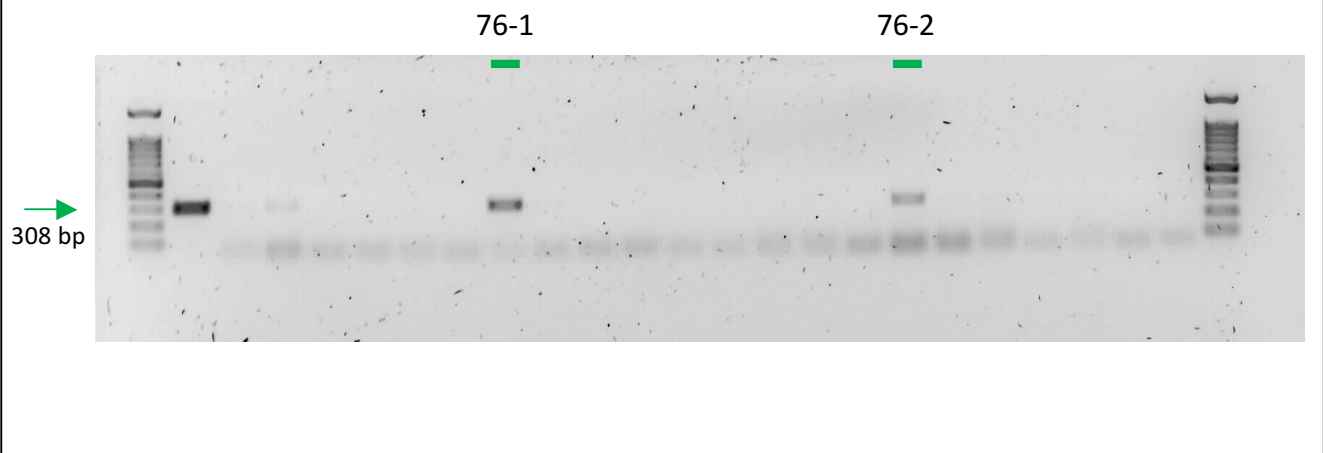

### Number veins versus leaf width

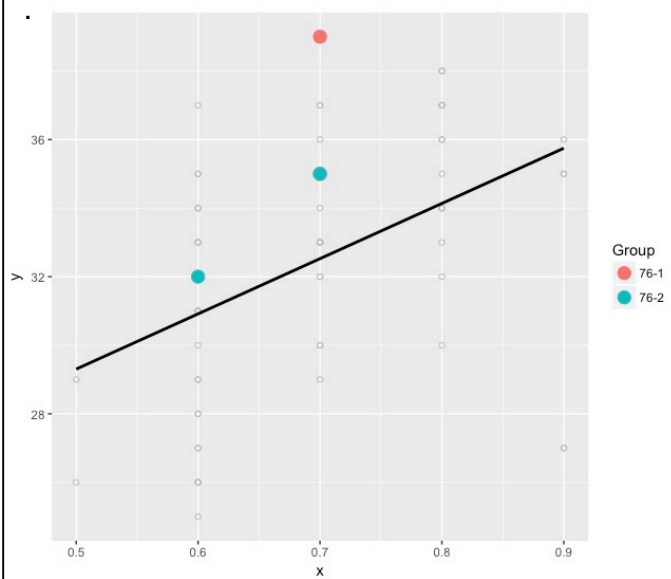

Representative cross section of segregating WT leaf

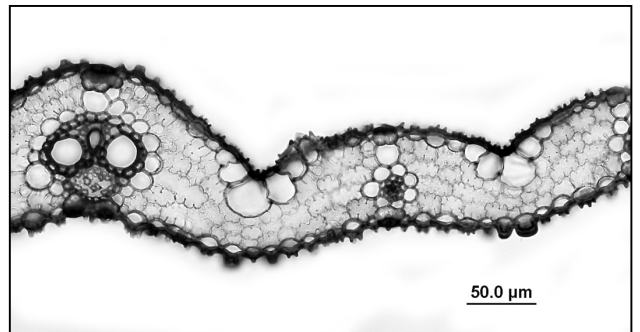

Representative cross section of line 76-2 leaf

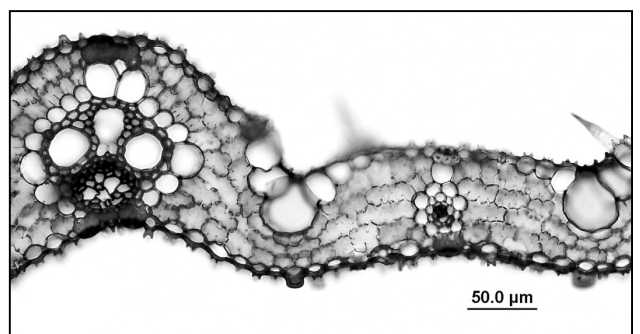

GRMZM2G126018

SBP domain

Gene ID: JL80

Foliar expression

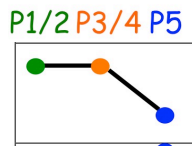

Husk expression

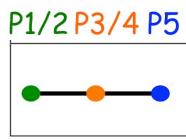

Construct: ZmUBI<sub>pro</sub>:cDNA (ID# 954)

Two independent T1 lines:

80-1 (IRS954-3 – 1 individual)

80-2 (IRS954-10 – 1 individual)

### Genomic PCR

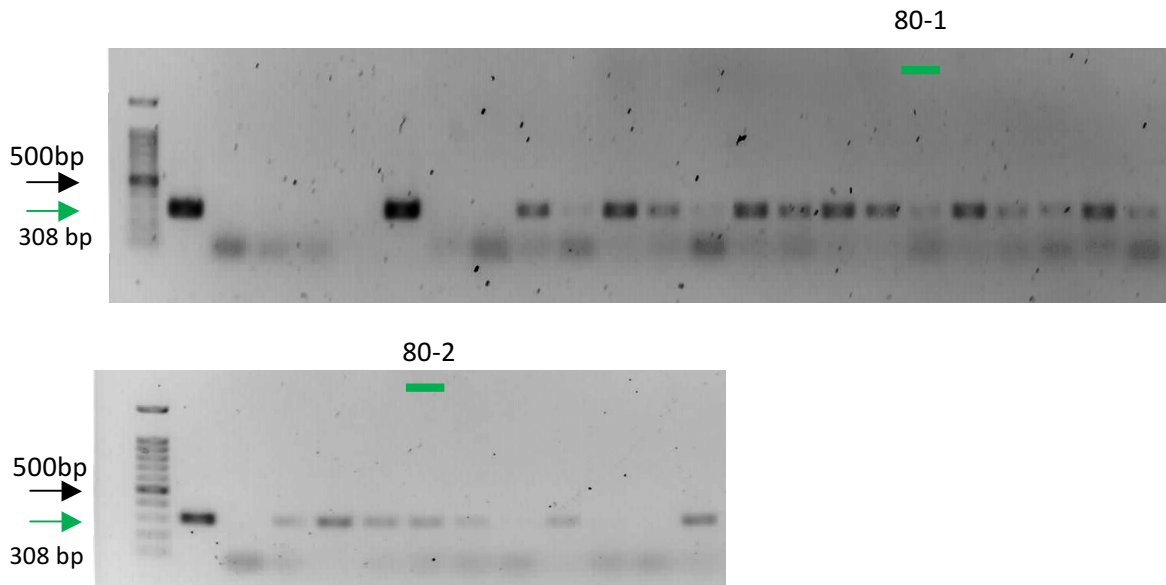

### Number veins versus leaf width

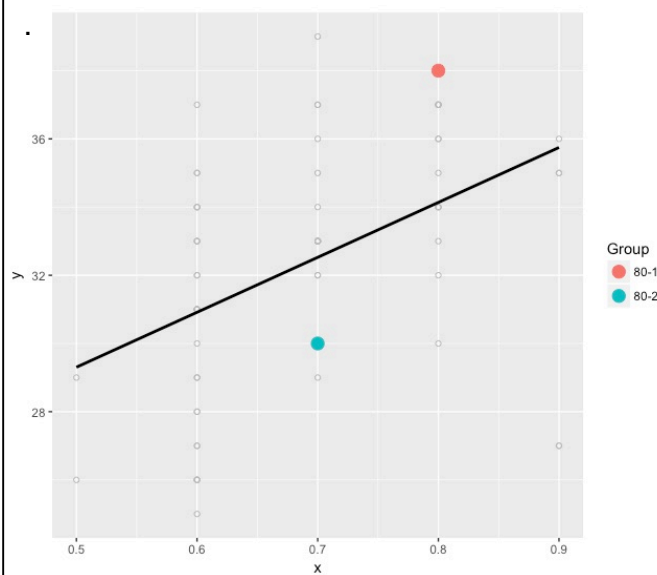

### Representative cross section of segregating WT leaf

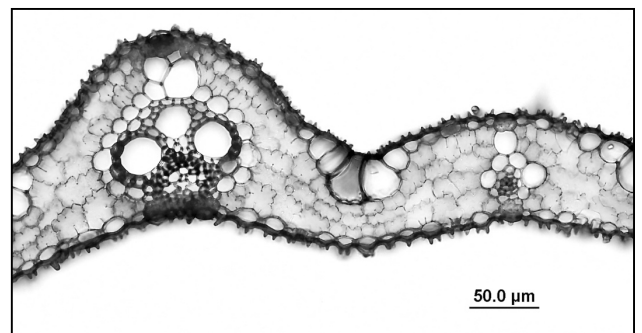

### Representative cross section of line 80-2 leaf

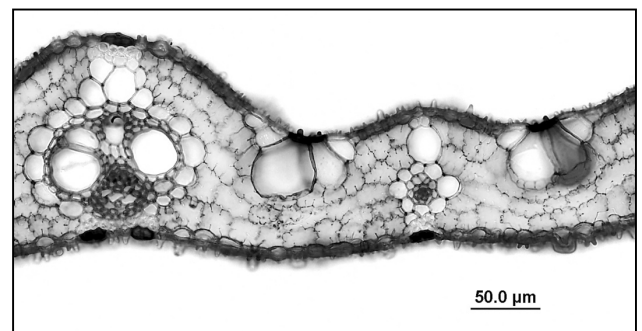

GRMZM2G312419

R2R3 Myb

Gene ID: JL81

Foliar expression

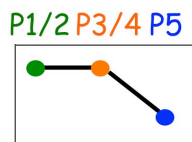

Husk expression

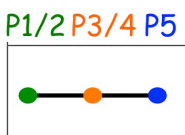

Construct: ZmUBI<sub>pro</sub>:cDNA (ID# 961)

Three independent T1 lines:

81-1 (IRS961-1 – 1 individual)

81-2 (IRS961-6 – 3 individuals)

81-3 (IRS961-9 – 1 individual)

### Southern blot

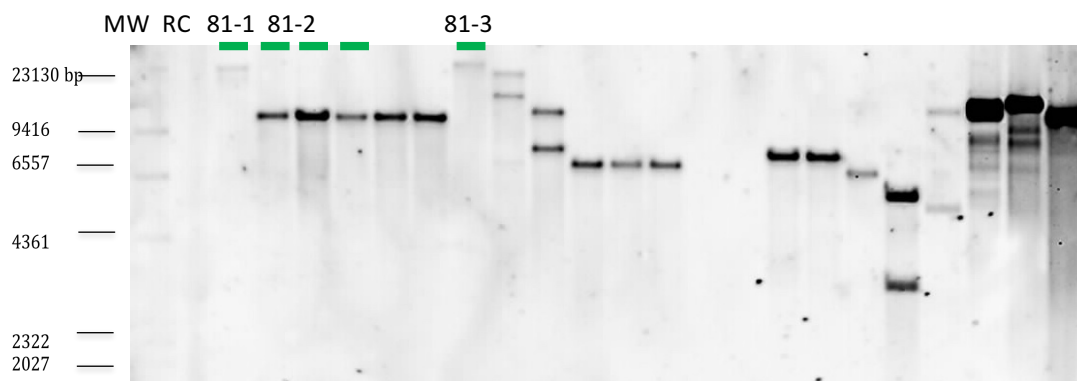

### Number veins versus leaf width

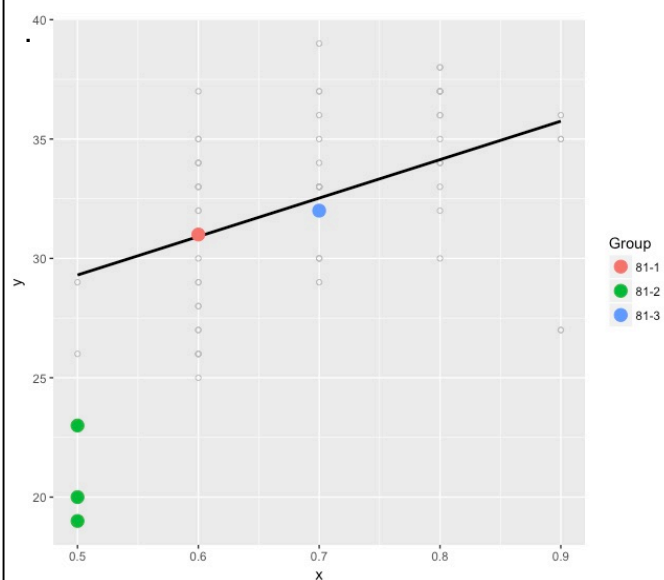

Representative cross section of segregating WT leaf

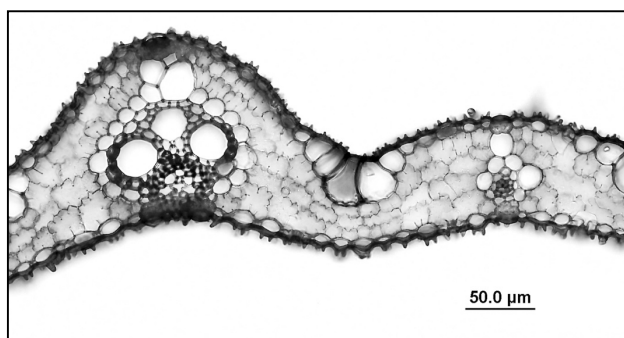

Representative cross section of line 81-3 leaf

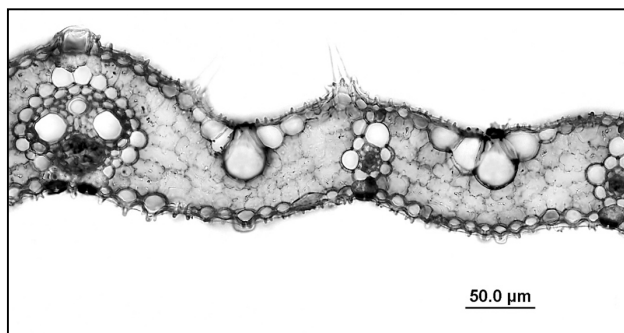

GRMZM2G478876

Serine threonine kinase

Gene ID: JL82

Foliar expression

P1/2 P3/4 P5

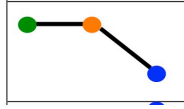

Husk expression

P1/2 P3/4 P5

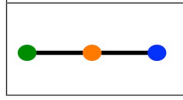

Construct: ZmUBI<sub>pro</sub>:cDNA (ID# 940)

Nine independent T1 lines:

82-1 (IRS940-4–6 individuals) 82-4 (IRS940-10–7 individuals) 82-7 (IRS940-17–3 individuals)  
82-2 (IRS940-5– 1 individual) 82-5 (IRS940-11–6 individuals) 82-8 (IRS940-19– 2 individuals)  
82-3 (IRS940-7– 1 individual) 82-6 (IRS940-15 –2 individuals) 82-9 (IRS940-35– 6 individuals)

### Southern blot

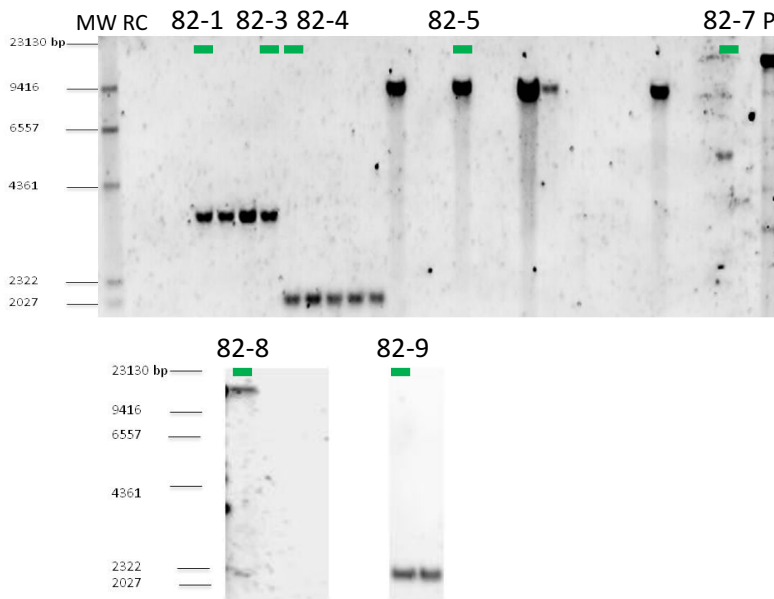

MW: DNA Molecular weight marker II, P- plasmid, RC- non-transgenic rice control

### Number veins versus leaf width

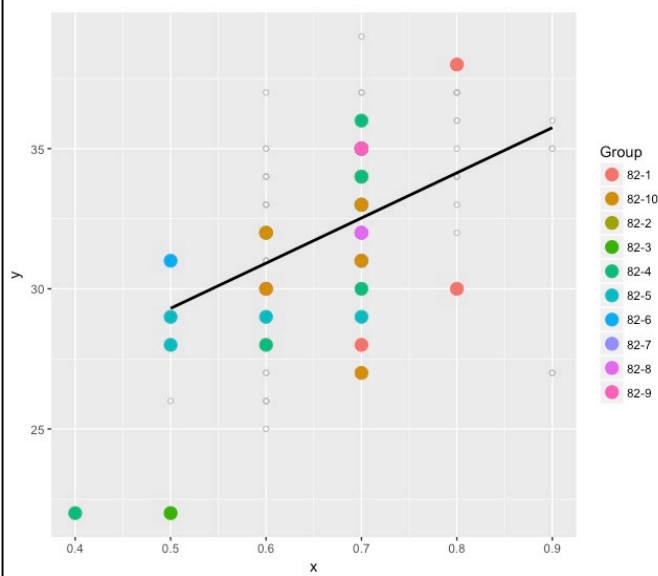

### Representative cross section of segregating WT leaf

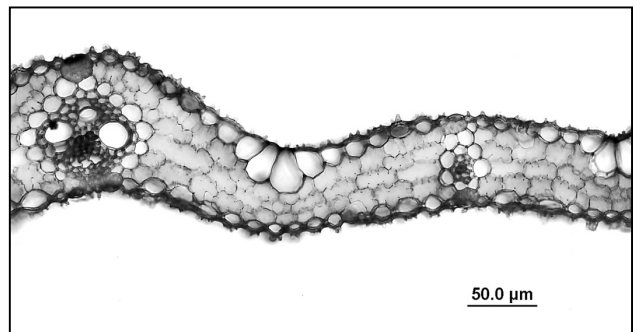

### Representative cross section of line 82-8 leaf

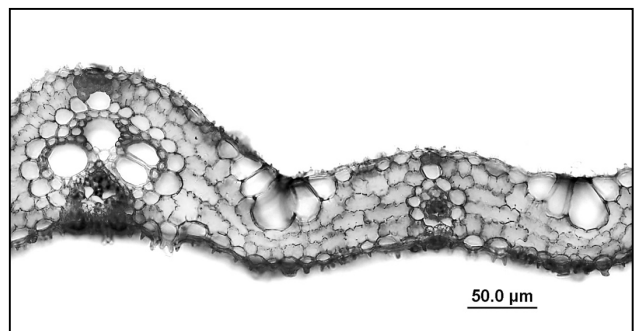

**Figure S1.** Phylogenetic tree of GRMZM2G074032 (*ZmIDD16*). Maximum-likelihood tree of the GRMZM2G074032 orthogroup (as defined by Orthofinder<sup>2</sup>). Numbers at each node are support values based on the consensus tree of 10 bootstrap replicates. Arabidopsis and rice proteins, plus the maize protein encoded by the gene analysed in this study are highlighted in yellow. Branch lengths reflect the number of amino acid substitutions per site.

**Figure S2.** Phylogenetic tree of GRMZM2G027068 (*ZmHLH106*). Maximum-likelihood tree of the GRMZM2G027068 orthogroup (as defined by Orthofinder<sup>2</sup>). Numbers at each node are support values based on the consensus tree of 10 bootstrap replicates. Arabidopsis proteins, plus the maize protein encoded by the gene analysed in this study are highlighted in yellow. Branch lengths reflect the number of amino acid substitutions per site.

**Figure S3.** Phylogenetic tree of GRMZM2G140694 (*ZmHCA2*). Maximum-likelihood tree of one of the sub-groups of the GRMZM2G140694 orthogroup (as defined by Orthofinder<sup>2</sup>). Numbers at each node are support values based on the consensus tree of 10 bootstrap replicates. Arabidopsis HCA2, plus the maize protein encoded by the gene analysed in this study are highlighted in yellow. Branch lengths reflect the number of amino acid substitutions per site.

**Figure S4.** Phylogenetic tree of GRMZM2G480386 (*YUCCA*). Maximum-likelihood tree of the GRMZM2G480386 orthogroup (as defined by Orthofinder<sup>2</sup>). Numbers at each node are support values based on the consensus tree of 10 bootstrap replicates. Rice YUCCA8 plus the maize protein encoded by the gene analysed in this study are highlighted in yellow. Branch lengths reflect the number of amino acid substitutions per site.

**Figure S5.** Phylogenetic tree of GRMZM2G011463 (*ZmSAUR60*). Maximum-likelihood tree of the GRMZM2G011463 orthogroup (as defined by Orthofinder<sup>2</sup>). Numbers at each node

are support values based on the consensus tree of 10 bootstrap replicates. Rice and Arabidopsis proteins, plus the maize protein encoded by the gene analysed in this study are highlighted in yellow. Branch lengths reflect the number of amino acid substitutions per site.

**Figure S6.** Phylogenetic tree of GRMZM2G098988 (*ZmSACL3*). Maximum-likelihood tree of the GRMZM2G098988 orthogroup (as defined by Orthofinder<sup>2</sup>). Numbers at each node are support values based on the consensus tree of 10 bootstrap replicates. Arabidopsis SACL3, plus the maize protein encoded by the gene analysed in this study are highlighted in yellow. Branch lengths reflect the number of amino acid substitutions per site.

**Figure S7.** Phylogenetic tree of GRMZM2G163724 (LRR kinase). Maximum-likelihood tree of the GRMZM2G163724 orthogroup (as defined by Orthofinder<sup>2</sup>). Numbers at each node are support values based on the consensus tree of 10 bootstrap replicates. Arabidopsis RDK1, plus the maize protein encoded by the gene analysed in this study are highlighted in yellow. Branch lengths reflect the number of amino acid substitutions per site.

**Figure S8.** Phylogenetic tree of GRMZM2G111045 (R2R3 MYB). Maximum-likelihood tree of the GRMZM2G111045 orthogroup (as defined by Orthofinder<sup>2</sup>). Numbers at each node are support values based on the consensus tree of 10 bootstrap replicates. Arabidopsis LMI2, plus the maize protein encoded by the gene analysed in this study are highlighted in yellow. Branch lengths reflect the number of amino acid substitutions per site.

**Figure S9.** Phylogenetic tree of GRMZM2G114893 (Unknown). Maximum-likelihood tree of the GRMZM2G114893 orthogroup (as defined by Orthofinder<sup>2</sup>). Numbers at each node are support values based on the consensus tree of 10 bootstrap replicates. The maize protein encoded by the gene analysed in this study is highlighted in yellow. Branch lengths reflect the number of amino acid substitutions per site.

**Figure S10.** Phylogenetic tree of GRMZM2G377217 (*ZmWRKY12*). Maximum-likelihood tree of one of the sub-groups of the GRMZM2G377217 orthogroup (as defined by Orthofinder<sup>2</sup>). Numbers at each node are support values based on the consensus tree of 10 bootstrap replicates. Arabidopsis proteins plus the maize protein encoded by the gene analysed in this study are highlighted in yellow. Branch lengths reflect the number of amino acid substitutions per site.

**Figure S11.** Details of activation tagged line M0094935. **a)** Schematic of rice chromosome 3 showing insertion site of T-DNA (red arrow) upstream of Os03g50920 in line M0094935. **b)** Gel images of RT-PCR reactions showing transcript levels of 03g50920 relative to actin in 21 day old seedling shoots of wild-type (WT) and the insertion line (M0094935).

# SUPPLEMENTARY FIGURE S1

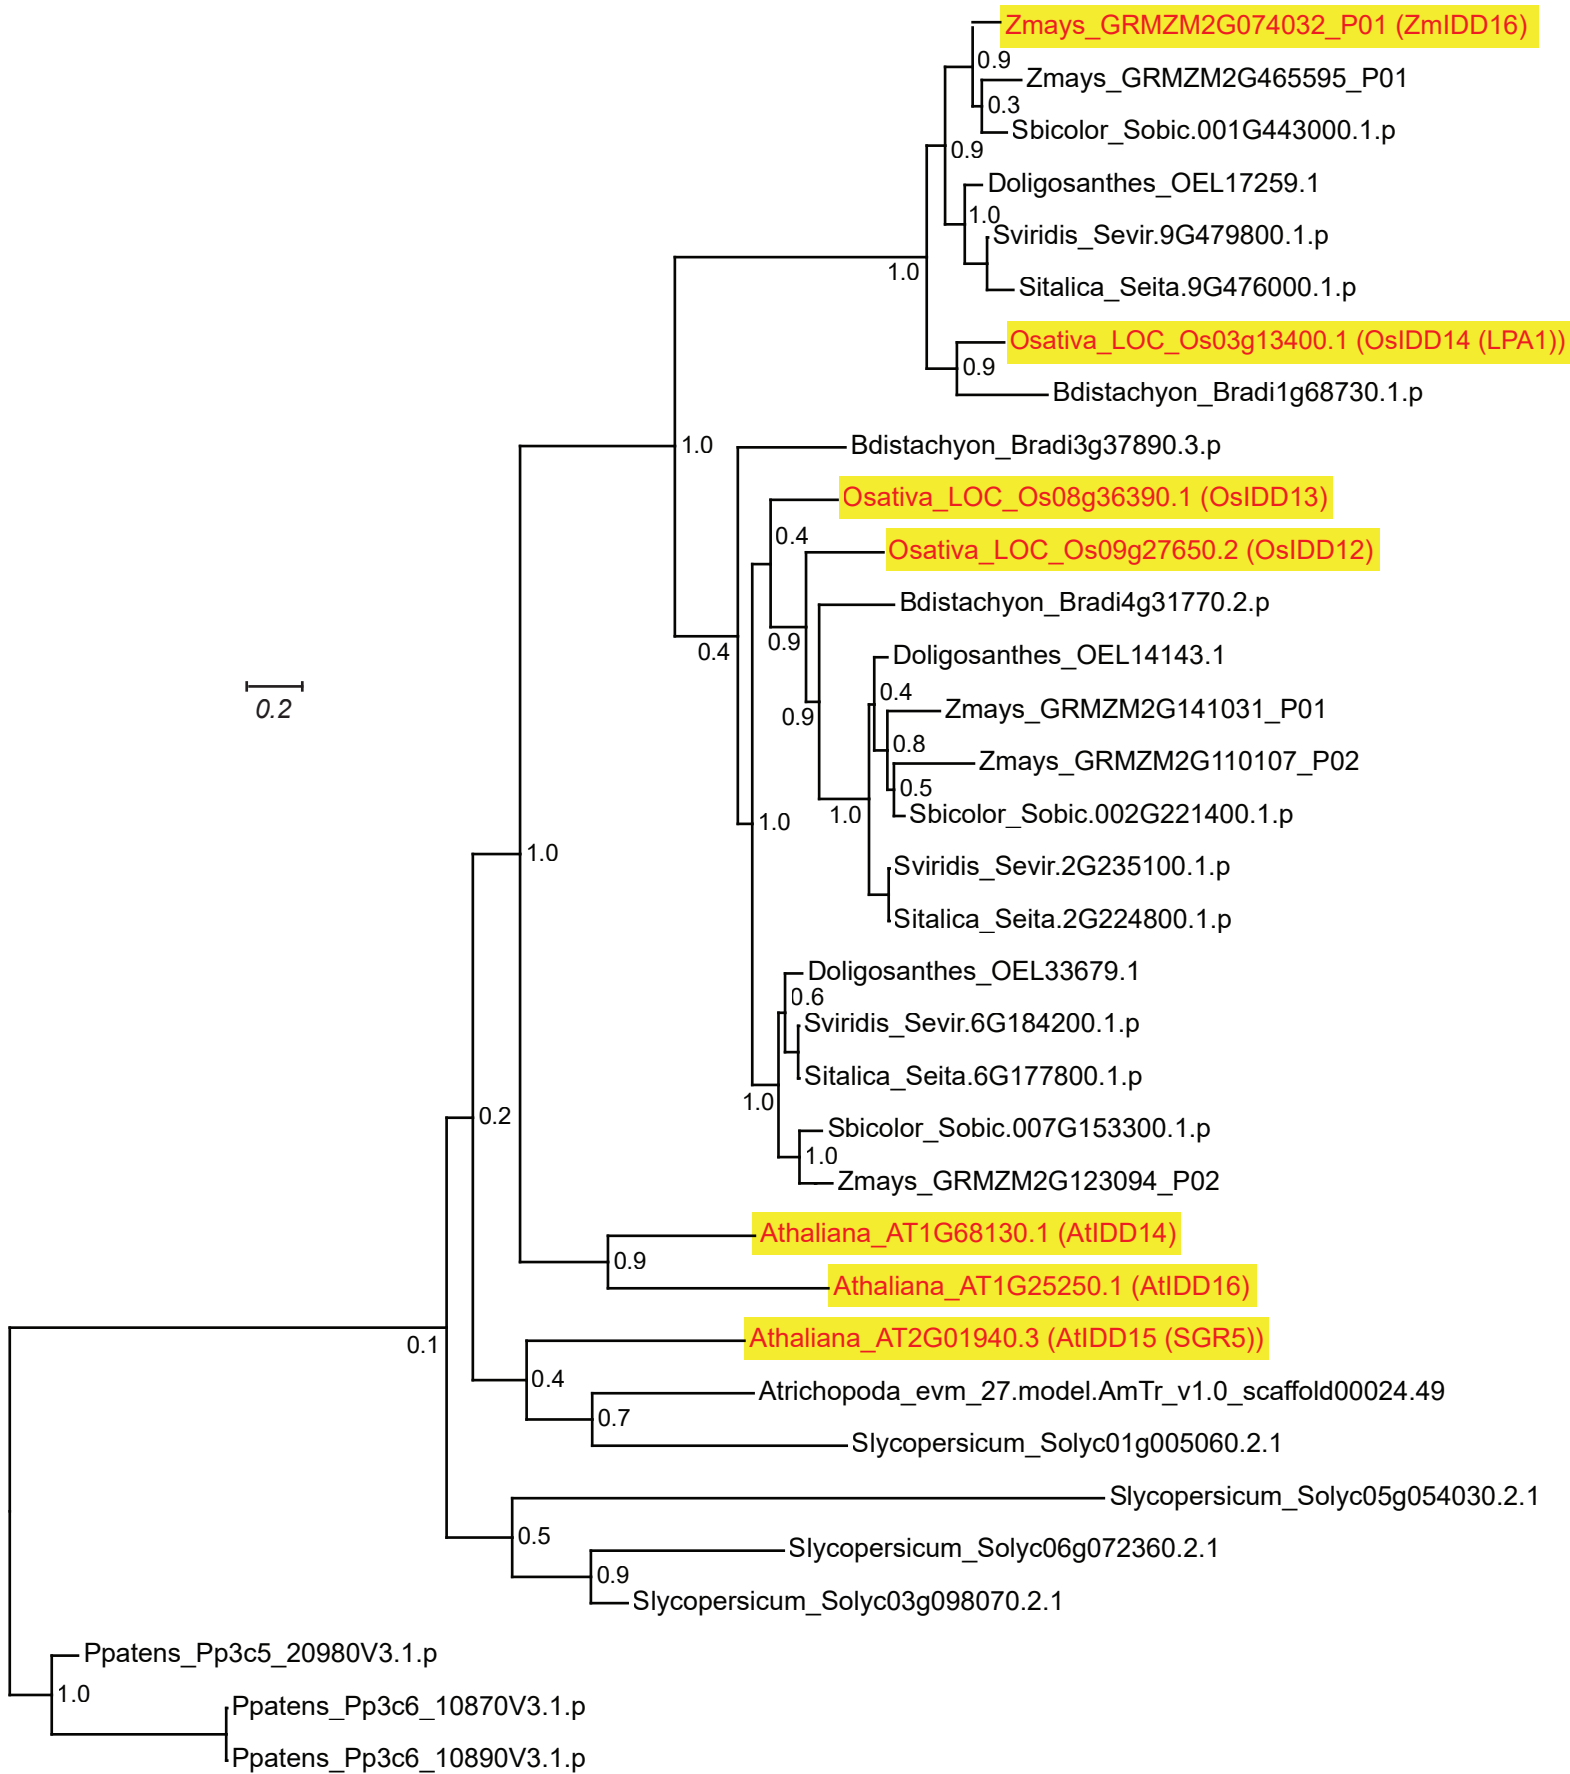



## SUPPLEMENTARY FIGURE S2

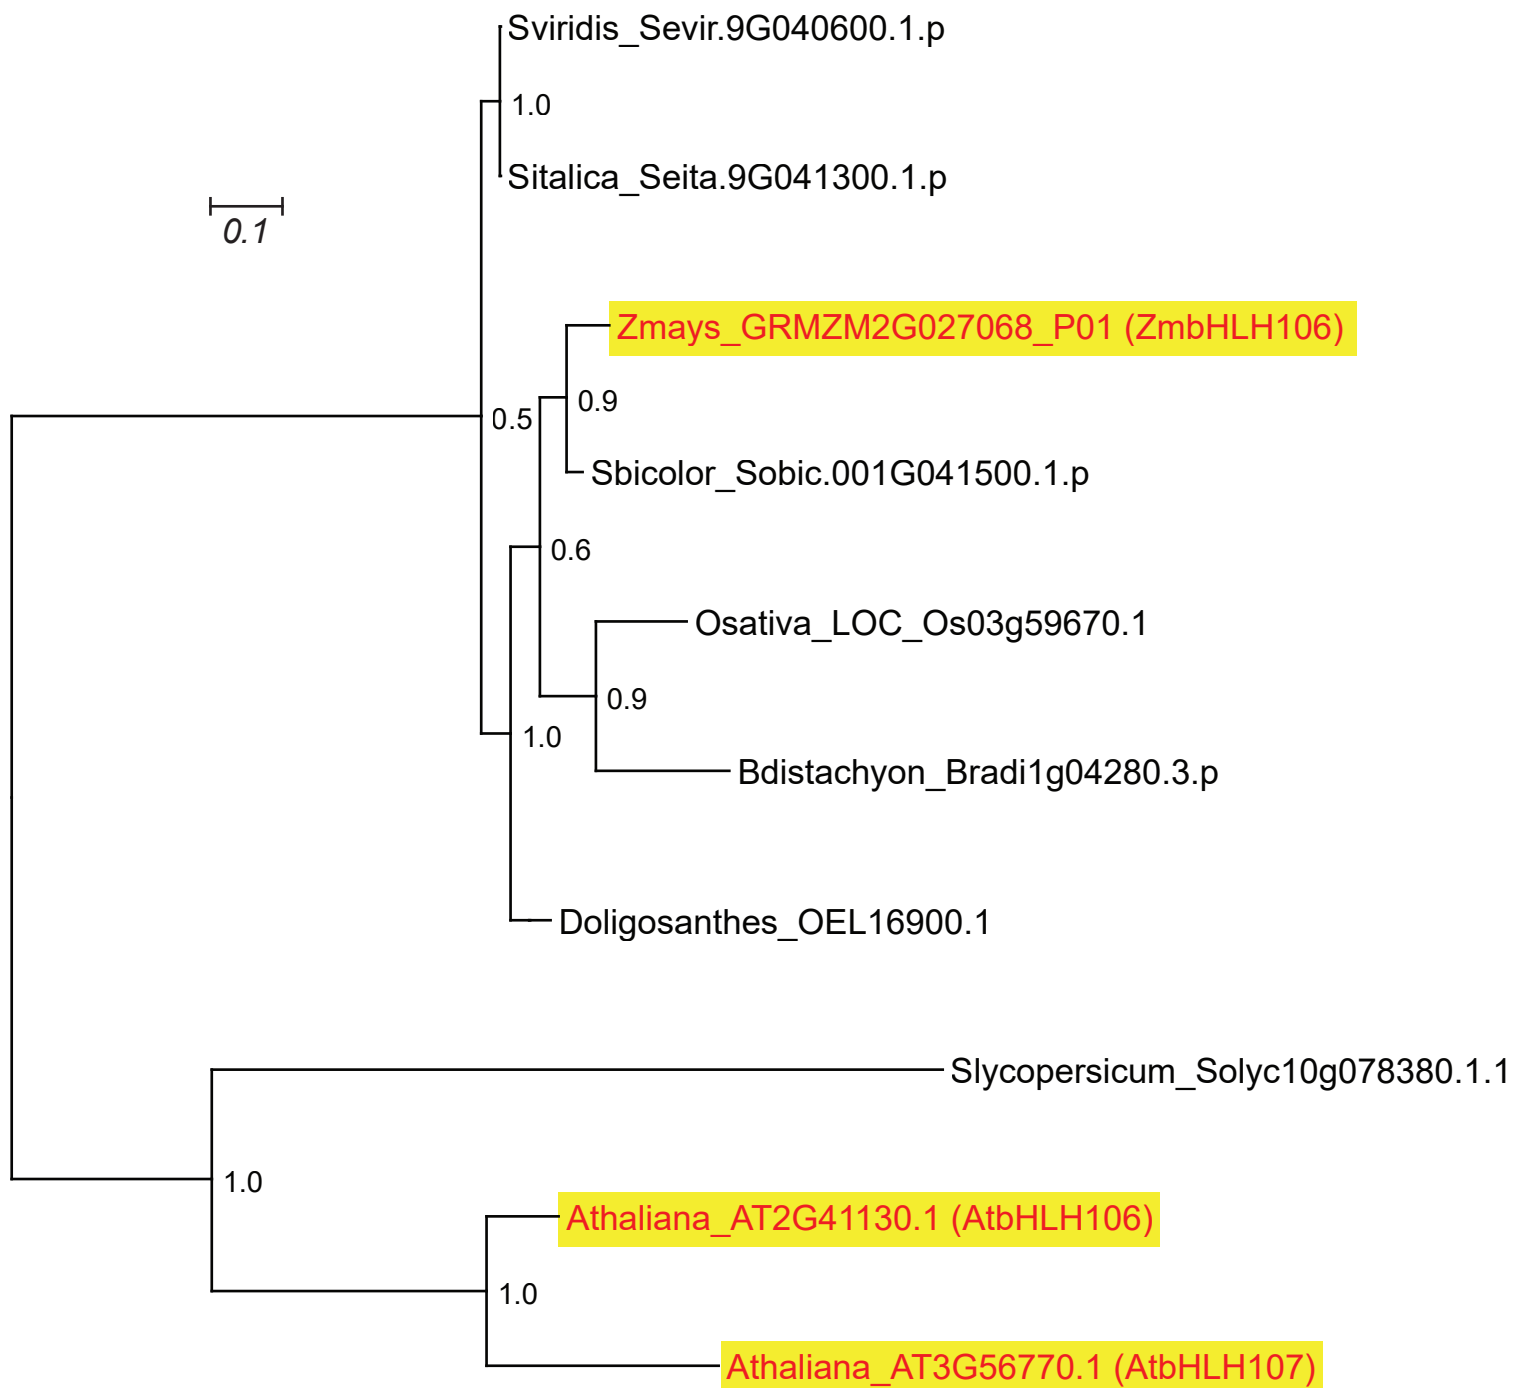

**SUPPLEMENTARY FIGURE S3**

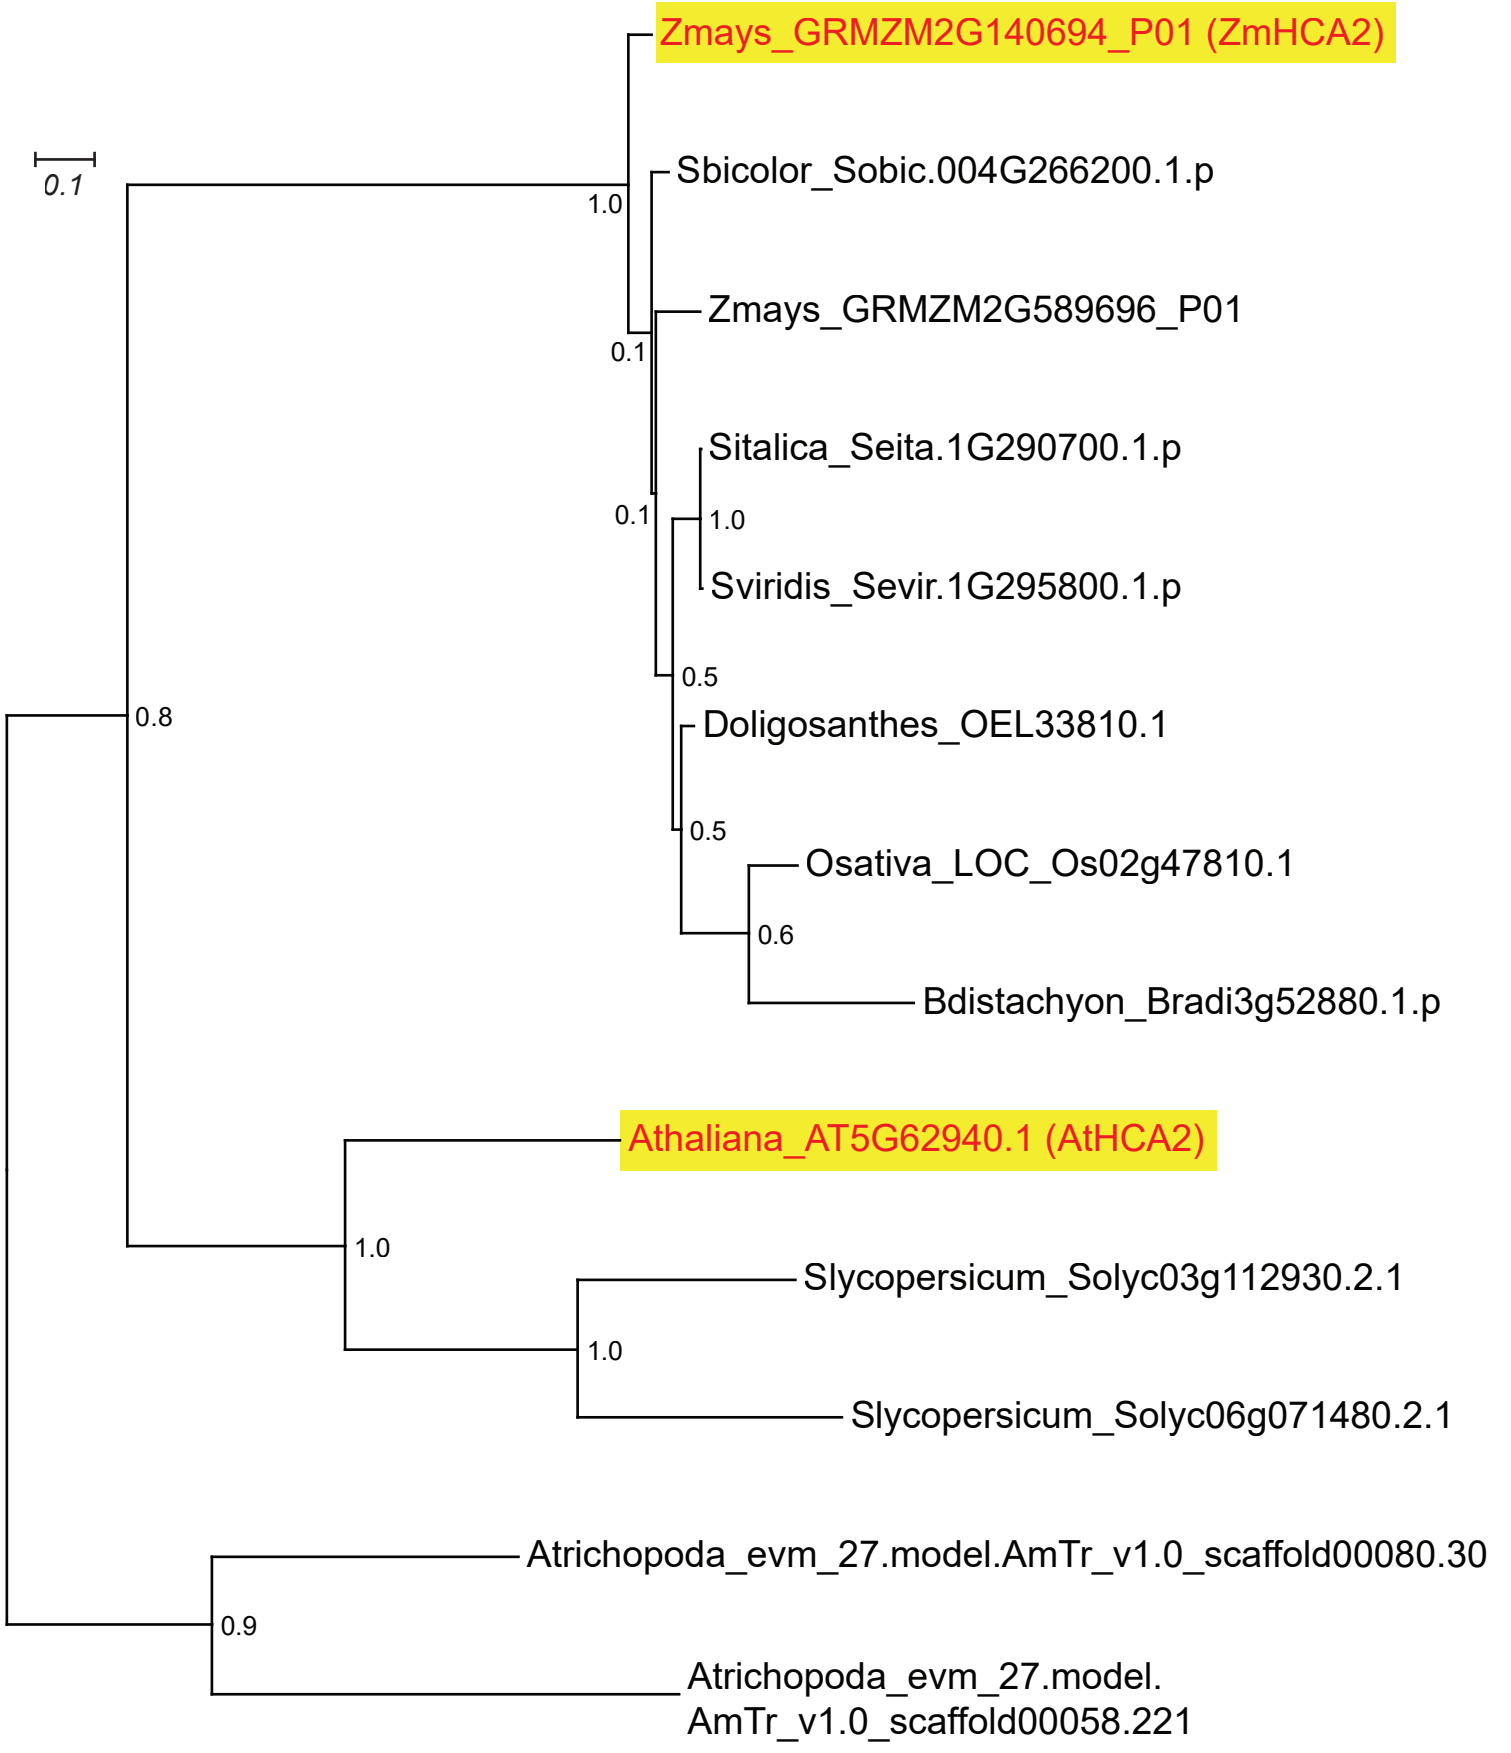

## SUPPLEMENTARY FIGURE S4

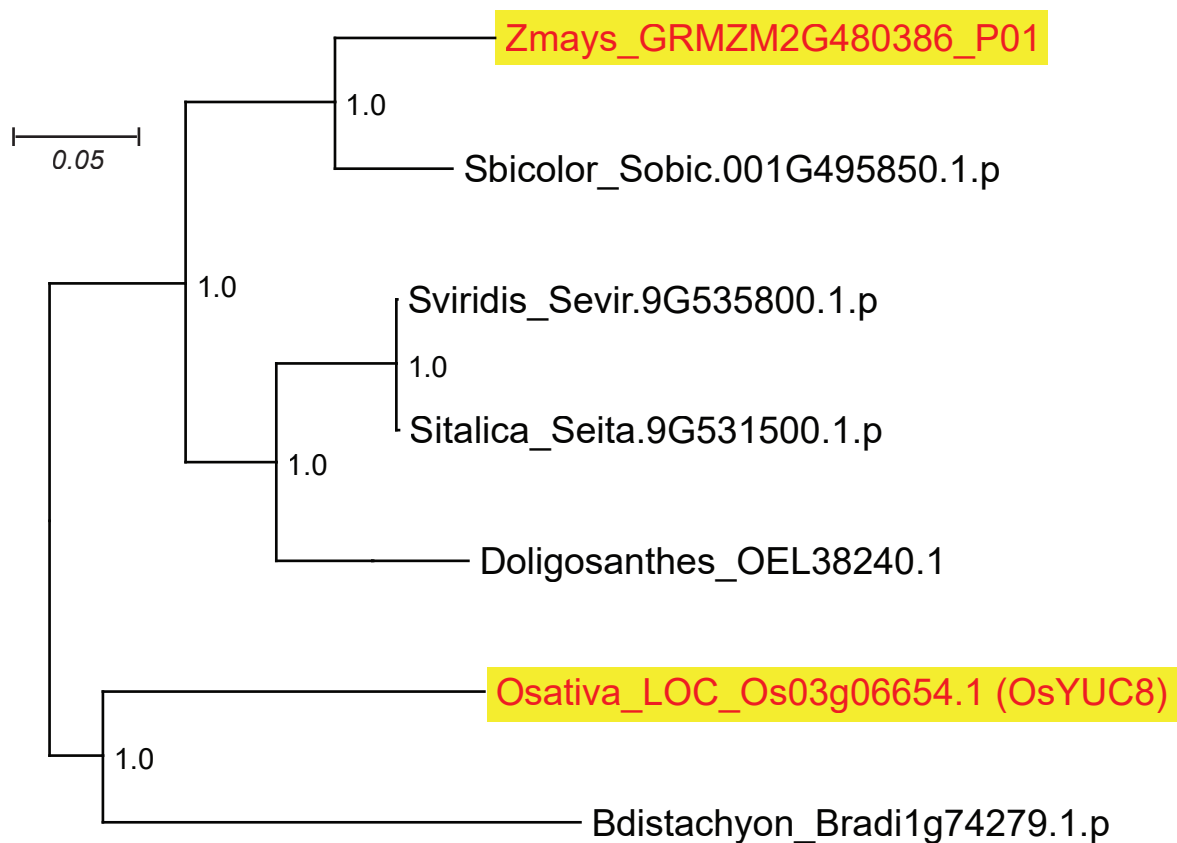

# SUPPLEMENTARY FIGURE S5

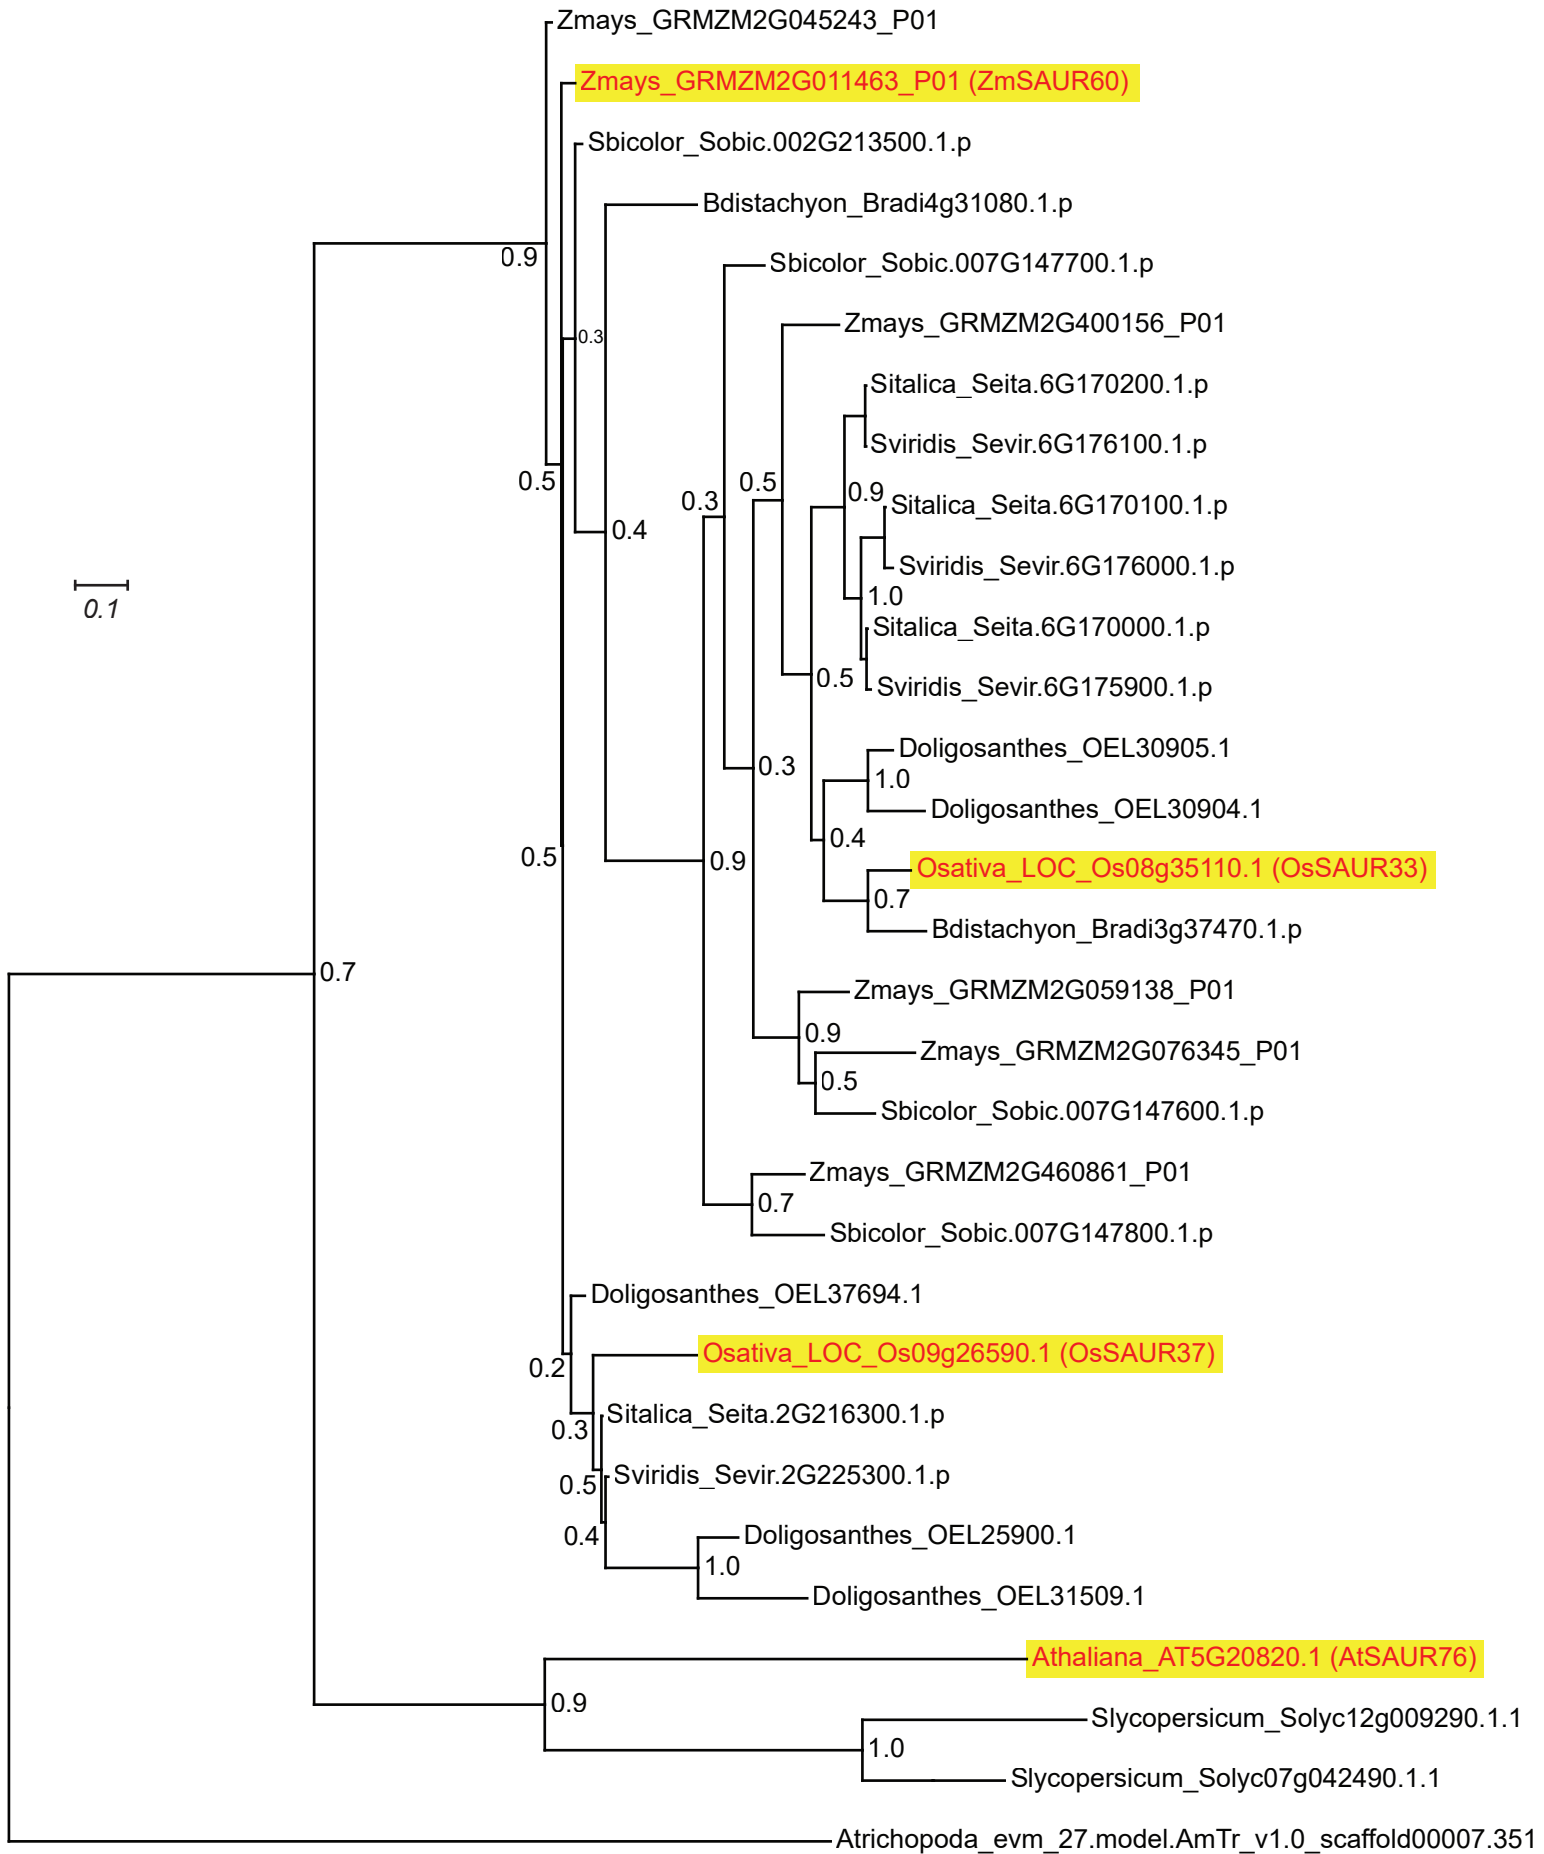

# SUPPLEMENTARY FIGURE S6

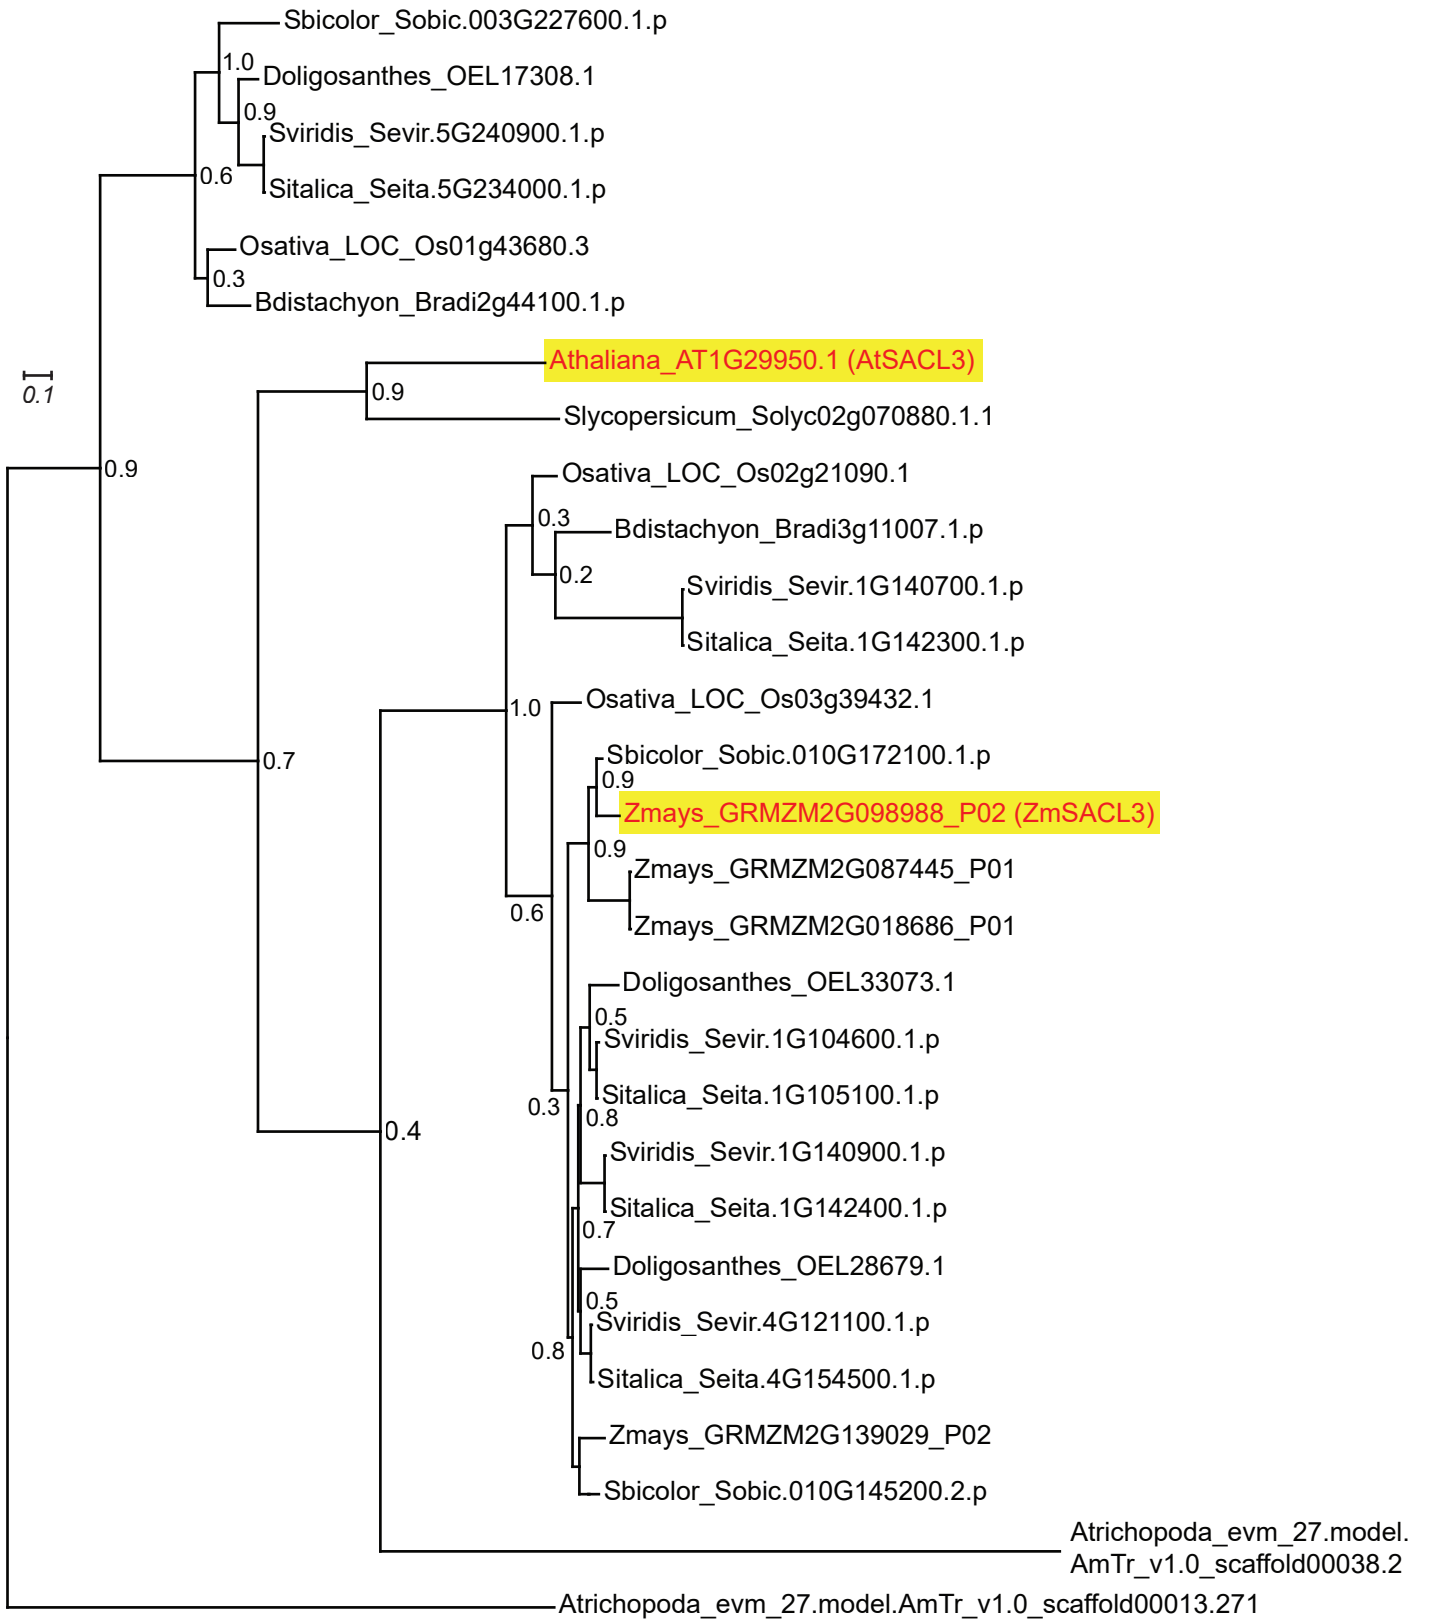

# SUPPLEMENTARY FIGURE S7

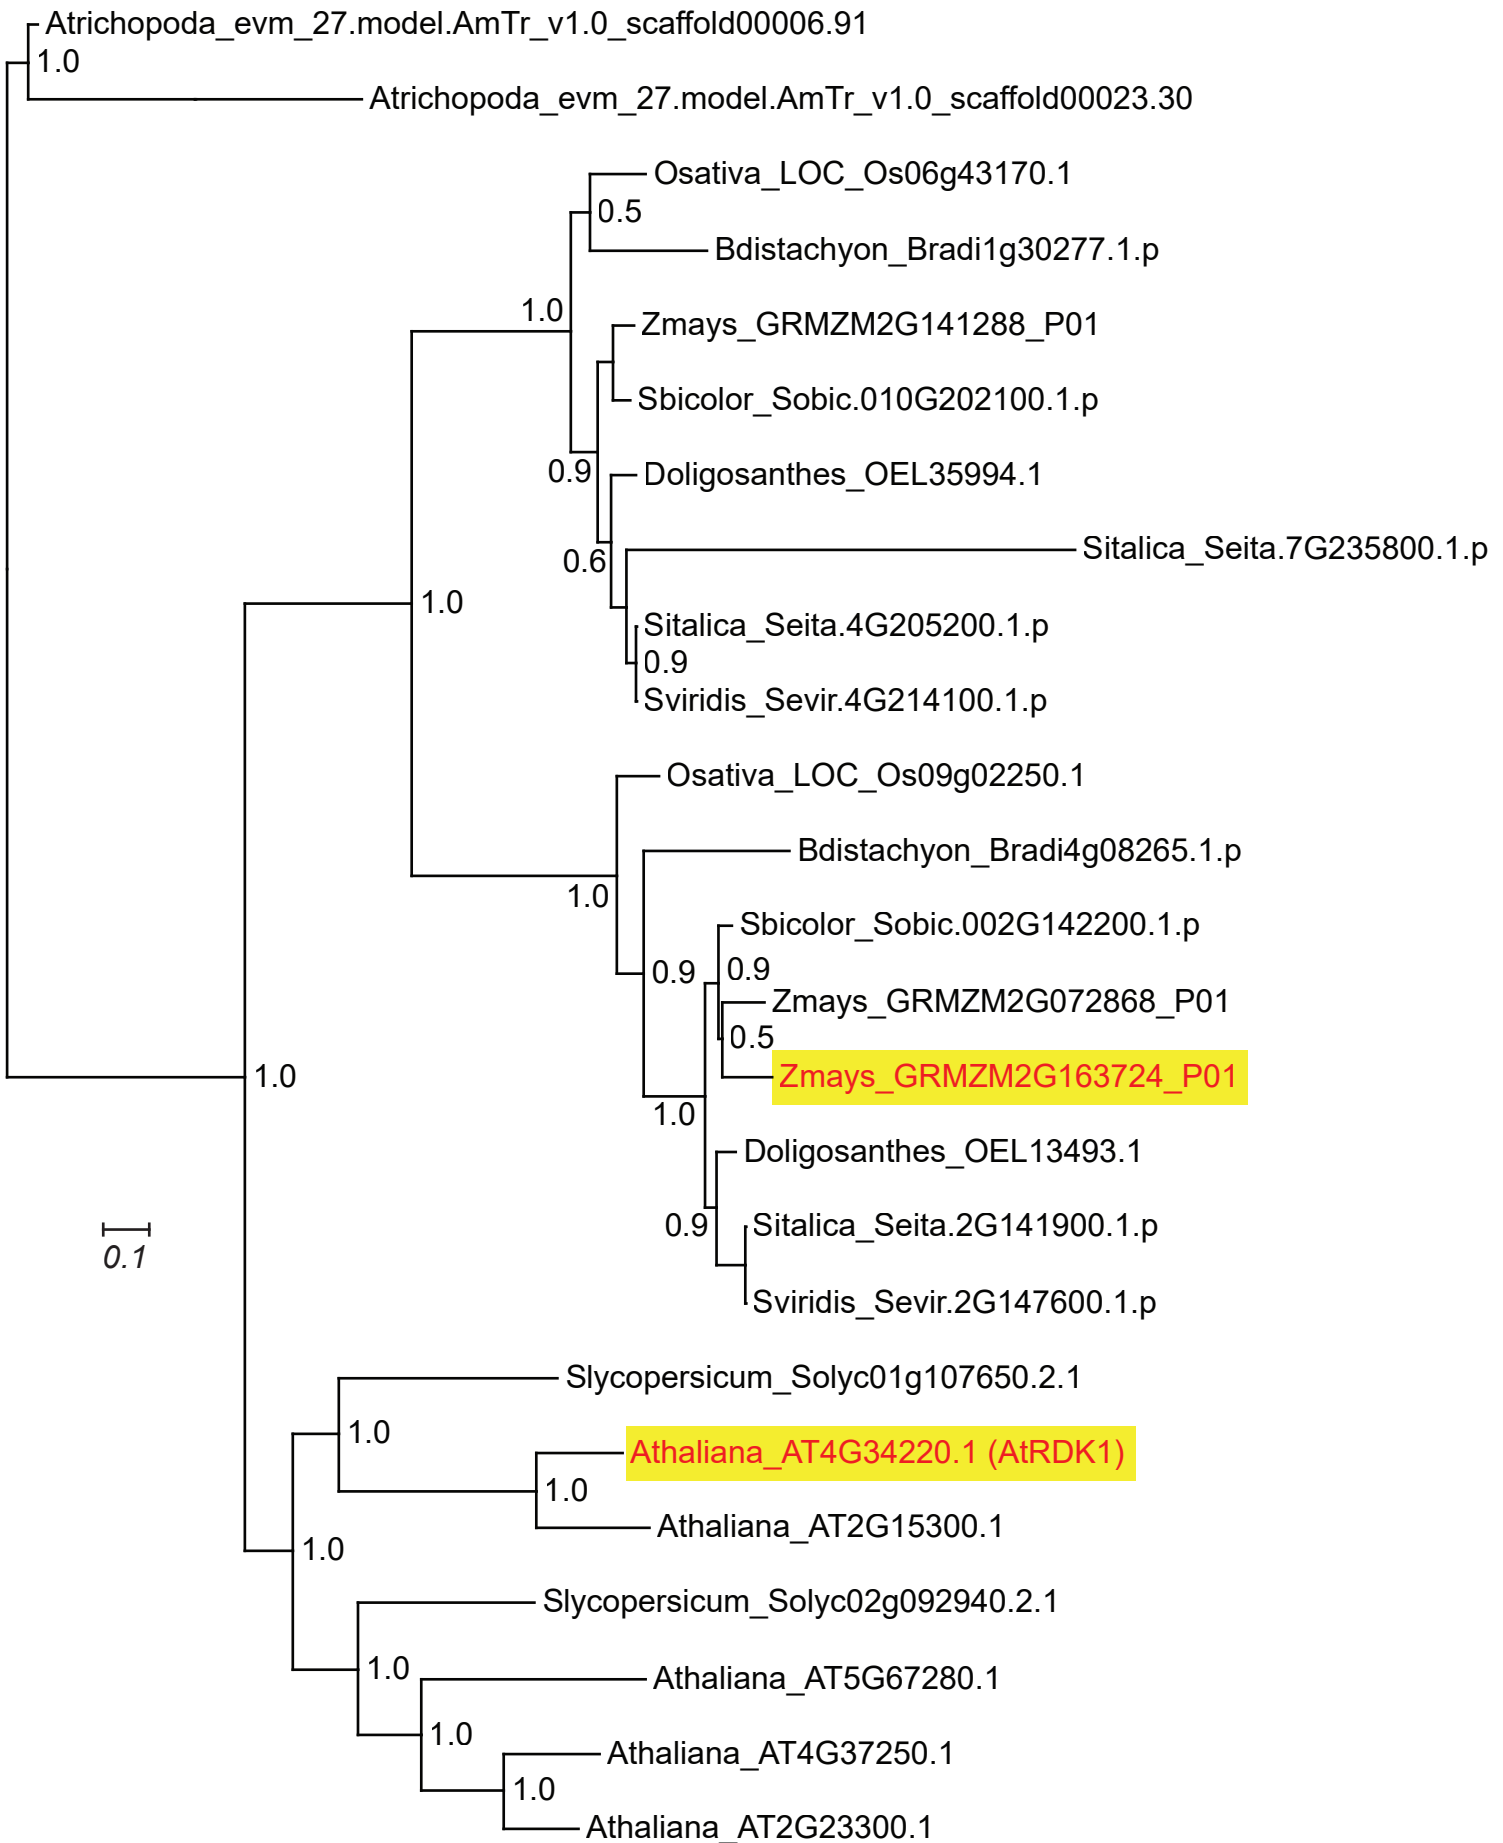

# SUPPLEMENTARY FIGURE S8

0.1

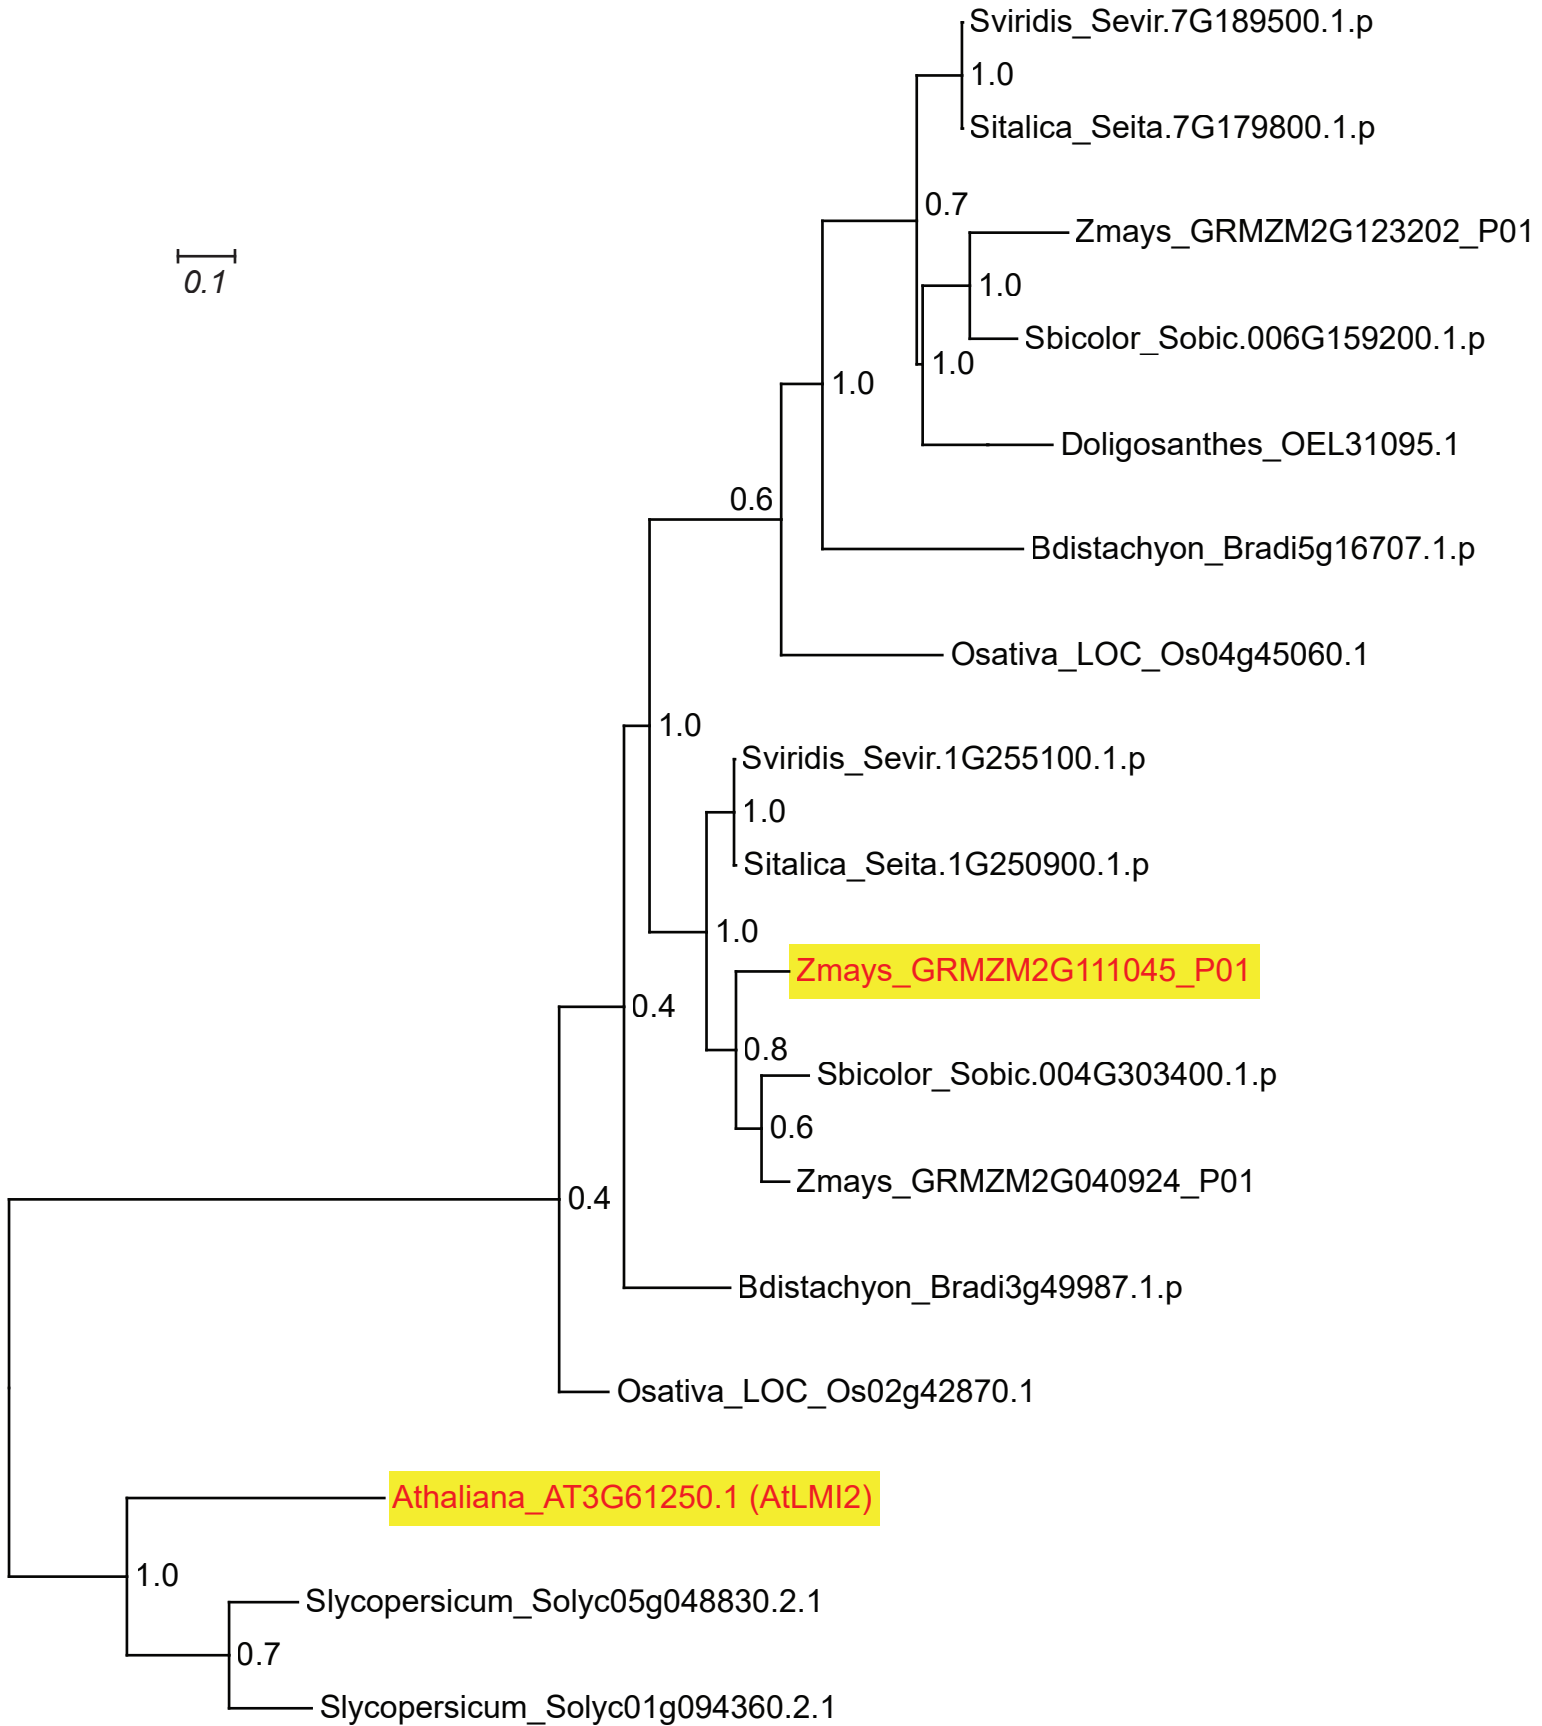

# SUPPLEMENTARY FIGURE S9

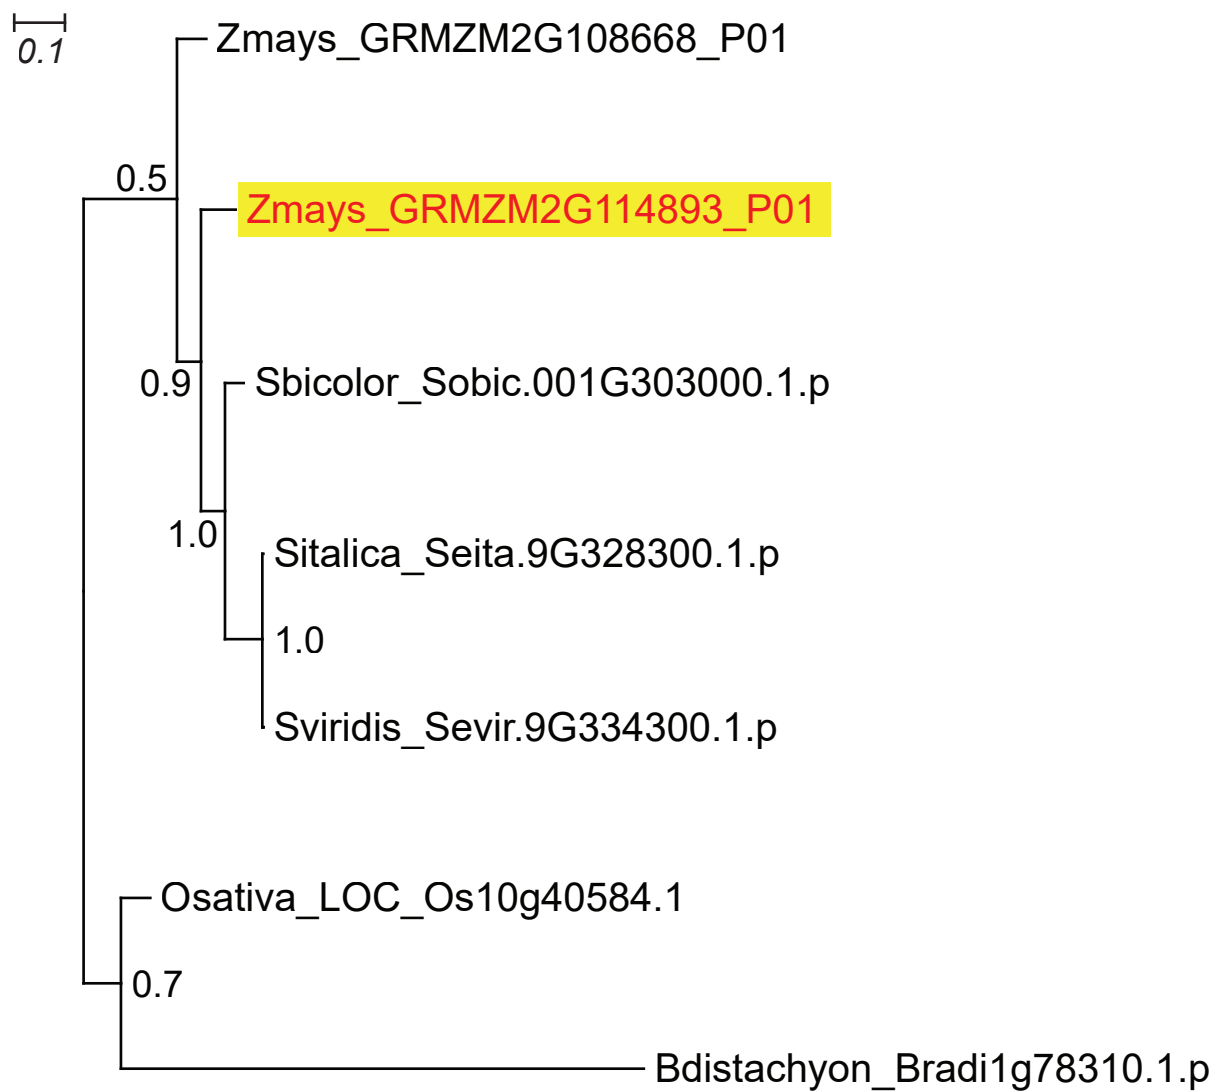



# SUPPLEMENTARY FIGURE S10

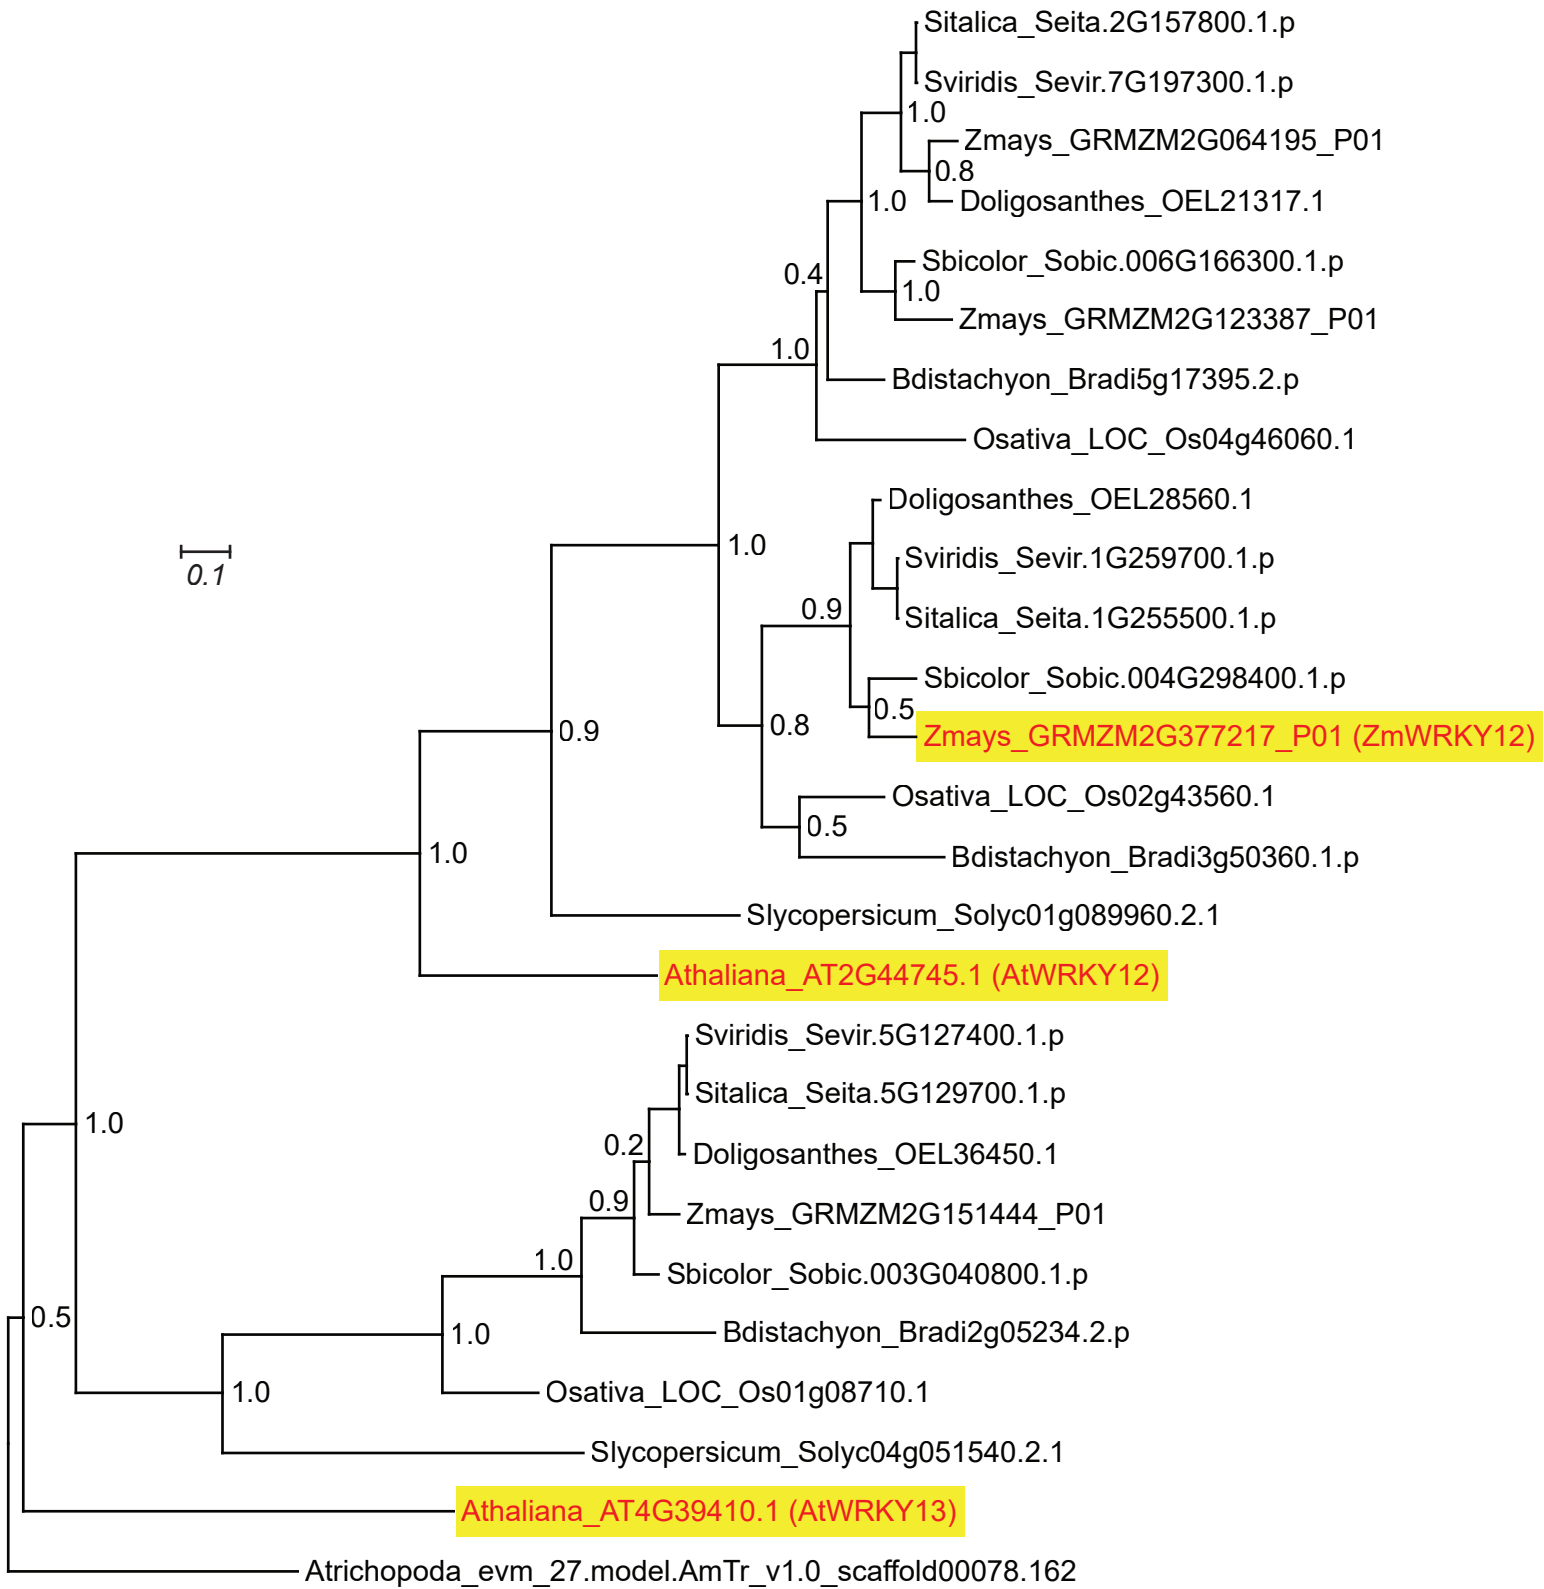

# SUPPLEMENTARY FIGURE S11

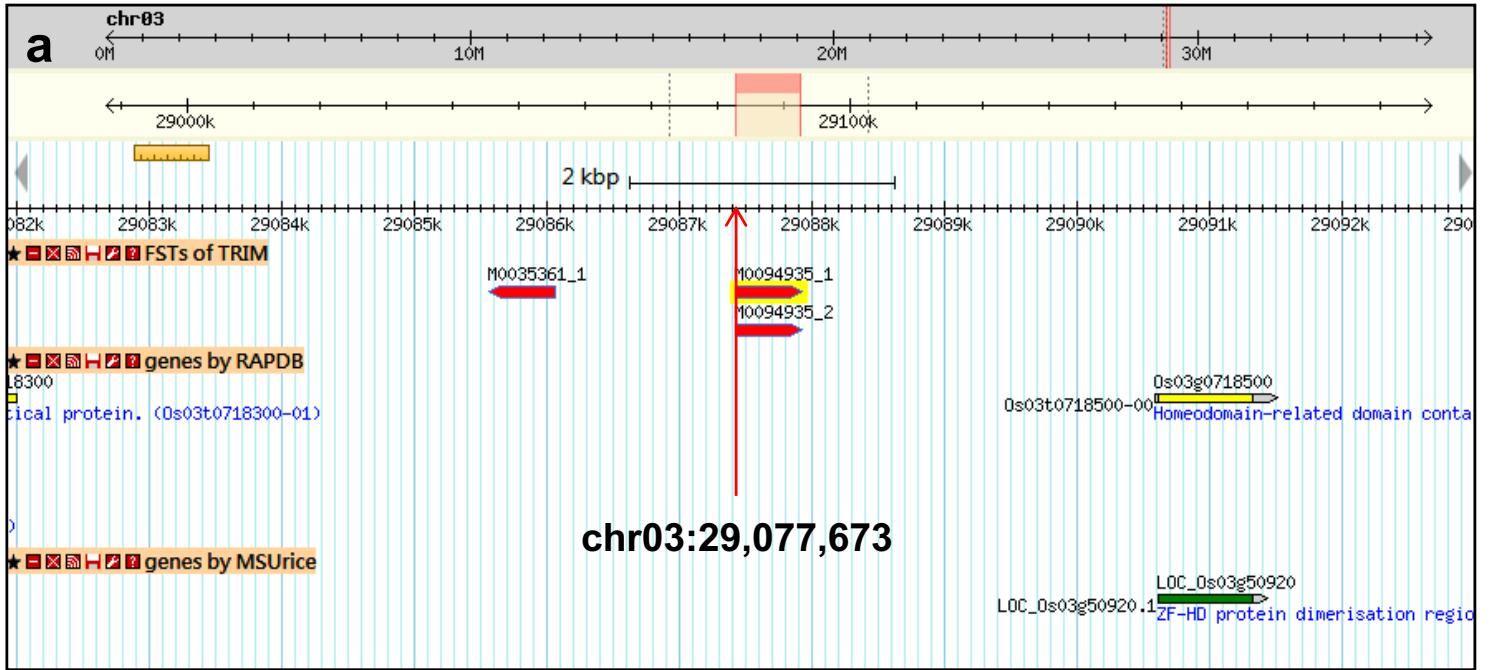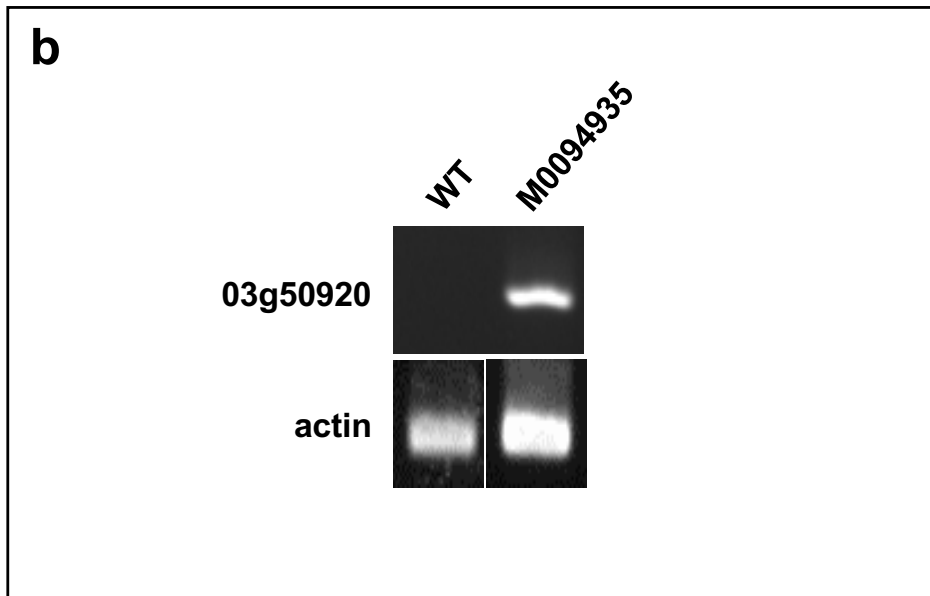

Supplement: 41598_2017_4361_MOESM1_ESM.pdf [file 41598_2017_4361_MOESM1_ESM.pdf]
